# Supplementary material for: Intraspecific leaf trait variability along a boreal-to-tropical community diversity gradient
Source: PLoS One. 2017 Feb 27;12(2):e0172495. doi: 10.1371/journal.pone.0172495 (PMC5328268; doi:10.1371/journal.pone.0172495)
Supplement: S1 Dataset — The first sheet contains leaf trait data for each individual within each species and type of forest. The second sheet contains data from the rarefaction analyses: the rarefied mean, the rarefied coefficient of variation (CV; Fig 2) and the rarefied standard error (sd) for both leaf size (LS) and SLA at species level. Also, it contains the sample size (n) per each species and the species richness for each community (SR). The third sheet presents the overlap data assuming normal trait distribution for both leaf size (LS) and SLA: median, proportion of low (< 0.25) and high (> 0.75) values of degree of trait overlap between species per each type of forest (Fig 3). The last sheet presents the overlap data under a kernel approach for both leaf size (LS) and SLA: median, proportion of low (< 0.25) and high (> 0.75) values of degree of trait overlap between species per each type of forest (S6 Fig). (XLSX) [file pone.0172495.s001.xlsx]

## Sheet: 5ind sps
site	richness	sps	la	sla	obs	ind
Evergreen_tropical_rainf_(Ecuador)	251	GUARMA	69.656	193.062	1	1
Evergreen_tropical_rainf_(Ecuador)	251	GUARMA	43.897	196.821	1	2
Evergreen_tropical_rainf_(Ecuador)	251	GUARMA	41.6263	186.168	1	3
Evergreen_tropical_rainf_(Ecuador)	251	GUARMA	134.914	172.525	1	4
Evergreen_tropical_rainf_(Ecuador)	251	GUARMA	94.9145	211.693	1	5
Evergreen_tropical_rainf_(Ecuador)	251	INGAMA	42.0547	199.395	1	1
Evergreen_tropical_rainf_(Ecuador)	251	INGAMA	60.652	209.746	1	2
Evergreen_tropical_rainf_(Ecuador)	251	INGAMA	38.7863	200.352	1	3
Evergreen_tropical_rainf_(Ecuador)	251	INGAMA	40.7393	166.272	1	4
Evergreen_tropical_rainf_(Ecuador)	251	INGAMA	49.718	170.419	1	5
Evergreen_tropical_rainf_(Ecuador)	251	PSEPSU	0.341667	NA	1	1
Evergreen_tropical_rainf_(Ecuador)	251	PSEPSU	1.772	360.976	1	2
Evergreen_tropical_rainf_(Ecuador)	251	PSEPSU	1.449	276.388	1	3
Evergreen_tropical_rainf_(Ecuador)	251	PSEPSU	0.660667	NA	1	4
Evergreen_tropical_rainf_(Ecuador)	251	PSEPSU	0.450667	NA	1	5
Lowland_trop_rainf_(Acarouany_FG)	148	Mouriri.sagotiana	45.3	114	1	1
Lowland_trop_rainf_(Acarouany_FG)	148	Mouriri.sagotiana	29	98.4	1	2
Lowland_trop_rainf_(Acarouany_FG)	148	Mouriri.sagotiana	48.5	110.6	1	3
Lowland_trop_rainf_(Acarouany_FG)	148	Mouriri.sagotiana	44.8	128.2	1	4
Lowland_trop_rainf_(Acarouany_FG)	148	Mouriri.sagotiana	42	163.1	1	5
Lowland_trop_rainf_(BAFOG_FG)	156	Poecilanthe.effusa	26.2	170	1	1
Lowland_trop_rainf_(BAFOG_FG)	156	Poecilanthe.effusa	28.1	193.1	1	2
Lowland_trop_rainf_(BAFOG_FG)	156	Poecilanthe.effusa	46.6	162.4	1	3
Lowland_trop_rainf_(BAFOG_FG)	156	Poecilanthe.effusa	29.3	226	1	4
Lowland_trop_rainf_(BAFOG_FG)	156	Poecilanthe.effusa	40.8	150.5	1	5
Lowland_trop_rainf_(BAFOG_FG)	156	Eschweilera.grandiflora	57.5	47.9	1	1
Lowland_trop_rainf_(BAFOG_FG)	156	Eschweilera.grandiflora	231.5	67.5	1	2
Lowland_trop_rainf_(BAFOG_FG)	156	Eschweilera.grandiflora	212.8	81.6	1	3
Lowland_trop_rainf_(BAFOG_FG)	156	Eschweilera.grandiflora	122.6	69.3	1	4
Lowland_trop_rainf_(BAFOG_FG)	156	Eschweilera.grandiflora	191.2	59.4	1	5
Lowland_trop_rainf_(BAFOG_FG)	156	Eschweilera.micrantha	52	117.6	1	1
Lowland_trop_rainf_(BAFOG_FG)	156	Eschweilera.micrantha	75.8	91.1	1	2
Lowland_trop_rainf_(BAFOG_FG)	156	Eschweilera.micrantha	47.2	124	1	3
Lowland_trop_rainf_(BAFOG_FG)	156	Eschweilera.micrantha	48.3	120	1	4
Lowland_trop_rainf_(BAFOG_FG)	156	Eschweilera.micrantha	74.9	94.3	1	5
Lowland_trop_rainf_(BAFOG_FG)	156	Gustavia.hexapetala	74.6	125.2	1	1
Lowland_trop_rainf_(BAFOG_FG)	156	Gustavia.hexapetala	67.6	142.1	1	2
Lowland_trop_rainf_(BAFOG_FG)	156	Gustavia.hexapetala	37.2	159.1	1	3
Lowland_trop_rainf_(BAFOG_FG)	156	Gustavia.hexapetala	71	158	1	4
Lowland_trop_rainf_(BAFOG_FG)	156	Gustavia.hexapetala	43.9	108.5	1	5
Lowland_trop_rainf_(BAFOG_FG)	156	Siparuna.decipiens	43.4	146.4	1	1
Lowland_trop_rainf_(BAFOG_FG)	156	Siparuna.decipiens	31.4	137	1	2
Lowland_trop_rainf_(BAFOG_FG)	156	Siparuna.decipiens	30.1	203.4	1	3
Lowland_trop_rainf_(BAFOG_FG)	156	Siparuna.decipiens	36.4	144.4	1	4
Lowland_trop_rainf_(BAFOG_FG)	156	Siparuna.decipiens	49.7	131.8	1	5
Lowland_trop_rainf_(Brazil)	284	Conh	139.284	102.049	1	1
Lowland_trop_rainf_(Brazil)	284	Conh	233.204	99.9688	1	2
Lowland_trop_rainf_(Brazil)	284	Conh	336.614	88.5158	1	3
Lowland_trop_rainf_(Brazil)	284	Conh	352.012	120.677	1	4
Lowland_trop_rainf_(Brazil)	284	Conh	346.522	136.854	1	5
Lowland_trop_rainf_(Brazil)	284	Escg	126.506	96.1464	1	1
Lowland_trop_rainf_(Brazil)	284	Escg	162.776	84.0489	1	2
Lowland_trop_rainf_(Brazil)	284	Escg	119.95	90.7392	1	3
Lowland_trop_rainf_(Brazil)	284	Escg	212.608	95.6292	1	4
Lowland_trop_rainf_(Brazil)	284	Escg	108.55	99.7768	1	5
Lowland_trop_rainf_(Brazil)	284	Escm	54	136.345	1	1
Lowland_trop_rainf_(Brazil)	284	Escm	59.846	112.902	1	2
Lowland_trop_rainf_(Brazil)	284	Escm	26.44	108.911	1	3
Lowland_trop_rainf_(Brazil)	284	Escm	55.916	153.146	1	4
Lowland_trop_rainf_(Brazil)	284	Escm	50.444	98.5431	1	5
Lowland_trop_rainf_(Brazil)	284	Escp	56.344	148.795	1	1
Lowland_trop_rainf_(Brazil)	284	Escp	50.642	135.152	1	2
Lowland_trop_rainf_(Brazil)	284	Escp	46.468	122.215	1	3
Lowland_trop_rainf_(Brazil)	284	Escp	57.776	105.814	1	4
Lowland_trop_rainf_(Brazil)	284	Escp	55.874	106.505	1	5
Lowland_trop_rainf_(Brazil)	284	Escu	87.762	109.486	1	1
Lowland_trop_rainf_(Brazil)	284	Escu	56.496	73.7442	1	2
Lowland_trop_rainf_(Brazil)	284	Escu	56.152	81.6238	1	3
Lowland_trop_rainf_(Brazil)	284	Escu	63.7233	51.6568	1	4
Lowland_trop_rainf_(Brazil)	284	Escu	70.832	104.308	1	5
Lowland_trop_rainf_(Brazil)	284	Fusl	80.612	98.6981	1	1
Lowland_trop_rainf_(Brazil)	284	Fusl	92.524	105.035	1	2
Lowland_trop_rainf_(Brazil)	284	Fusl	101.658	94.7994	1	3
Lowland_trop_rainf_(Brazil)	284	Fusl	78.2	97.397	1	4
Lowland_trop_rainf_(Brazil)	284	Fusl	85.756	101.938	1	5
Lowland_trop_rainf_(Brazil)	284	Lecp	130.57	140.833	1	1
Lowland_trop_rainf_(Brazil)	284	Lecp	145.182	NA	1	2
Lowland_trop_rainf_(Brazil)	284	Lecp	249.594	118.426	1	3
Lowland_trop_rainf_(Brazil)	284	Lecp	255.592	106.522	1	4
Lowland_trop_rainf_(Brazil)	284	Lecp	154.494	121.217	1	5
Lowland_trop_rainf_(Brazil)	284	Manb	21.776	92.7428	1	1
Lowland_trop_rainf_(Brazil)	284	Manb	37.738	90.2477	1	2
Lowland_trop_rainf_(Brazil)	284	Manb	31.142	90.1029	1	3
Lowland_trop_rainf_(Brazil)	284	Manb	61.322	103.498	1	4
Lowland_trop_rainf_(Brazil)	284	Manb	33.85	106.449	1	5
Lowland_trop_rainf_(Brazil)	284	Paro	28.7626	127.466	1	1
Lowland_trop_rainf_(Brazil)	284	Paro	34.1232	129.492	1	2
Lowland_trop_rainf_(Brazil)	284	Paro	48.29	128.056	1	3
Lowland_trop_rainf_(Brazil)	284	Paro	47.0821	131.824	1	4
Lowland_trop_rainf_(Brazil)	284	Paro	38.0772	152.557	1	5
Lowland_trop_rainf_(Brazil)	284	Poua	48.266	83.0859	1	1
Lowland_trop_rainf_(Brazil)	284	Poua	41.17	104.046	1	2
Lowland_trop_rainf_(Brazil)	284	Poua	46.428	108.047	1	3
Lowland_trop_rainf_(Brazil)	284	Poua	42.634	98.5347	1	4
Lowland_trop_rainf_(Brazil)	284	Poua	61.614	95.8073	1	5
Lowland_trop_rainf_(Brazil)	284	Psel	76.006	157.594	1	1
Lowland_trop_rainf_(Brazil)	284	Psel	31.666	106.615	1	2
Lowland_trop_rainf_(Brazil)	284	Psel	63.888	86.0633	1	3
Lowland_trop_rainf_(Brazil)	284	Psel	53.144	147.799	1	4
Lowland_trop_rainf_(Brazil)	284	Psel	69.622	115.538	1	5
Lowland_trop_rainf_(Brazil)	284	Swae	152.343	95.9836	1	1
Lowland_trop_rainf_(Brazil)	284	Swae	124.476	83.5076	1	2
Lowland_trop_rainf_(Brazil)	284	Swae	94.2944	104.497	1	3
Lowland_trop_rainf_(Brazil)	284	Swae	93.4032	124.784	1	4
Lowland_trop_rainf_(Brazil)	284	Swae	135.642	118.385	1	5
Lowland_trop_rainf_(Montagne_Tortue_FG)	213	Poraqueiba.guianensis	124	81.9	1	1
Lowland_trop_rainf_(Montagne_Tortue_FG)	213	Poraqueiba.guianensis	87	103.9	1	2
Lowland_trop_rainf_(Montagne_Tortue_FG)	213	Poraqueiba.guianensis	94.4	110.8	1	3
Lowland_trop_rainf_(Montagne_Tortue_FG)	213	Poraqueiba.guianensis	78.5	98.2	1	4
Lowland_trop_rainf_(Montagne_Tortue_FG)	213	Poraqueiba.guianensis	134.6	108.1	1	5
Lowland_trop_rainf_(Montagne_Tortue_FG)	213	Theobroma.subincanum	74	95	1	1
Lowland_trop_rainf_(Montagne_Tortue_FG)	213	Theobroma.subincanum	104.9	156.2	1	2
Lowland_trop_rainf_(Montagne_Tortue_FG)	213	Theobroma.subincanum	75.7	111.2	1	3
Lowland_trop_rainf_(Montagne_Tortue_FG)	213	Theobroma.subincanum	65.4	106.3	1	4
Lowland_trop_rainf_(Montagne_Tortue_FG)	213	Theobroma.subincanum	110.5	118.1	1	5
Lowland_trop_rainf_(Montagne_Tortue_FG)	213	Casearia.javitensis	91.6	97.4	1	1
Lowland_trop_rainf_(Montagne_Tortue_FG)	213	Casearia.javitensis	120.3	143.9	1	2
Lowland_trop_rainf_(Montagne_Tortue_FG)	213	Casearia.javitensis	74.8	129.7	1	3
Lowland_trop_rainf_(Montagne_Tortue_FG)	213	Casearia.javitensis	79.2	172	1	4
Lowland_trop_rainf_(Montagne_Tortue_FG)	213	Casearia.javitensis	51.5	142	1	5
Lowland_trop_rainf_(Montagne_Tortue_FG)	213	Cupania.scrobiculata	47.4	162	1	1
Lowland_trop_rainf_(Montagne_Tortue_FG)	213	Cupania.scrobiculata	69.9	166.4	1	2
Lowland_trop_rainf_(Montagne_Tortue_FG)	213	Cupania.scrobiculata	34.6	173.4	1	3
Lowland_trop_rainf_(Montagne_Tortue_FG)	213	Cupania.scrobiculata	48.1	188.4	1	4
Lowland_trop_rainf_(Montagne_Tortue_FG)	213	Cupania.scrobiculata	62	173.6	1	5
Lowland_trop_rainf_(Montagne_Tortue_FG)	213	Micropholis.guyanensis	40.5	87.1	1	1
Lowland_trop_rainf_(Montagne_Tortue_FG)	213	Micropholis.guyanensis	66.1	100.9	1	2
Lowland_trop_rainf_(Montagne_Tortue_FG)	213	Micropholis.guyanensis	39.9	110.2	1	3
Lowland_trop_rainf_(Montagne_Tortue_FG)	213	Micropholis.guyanensis	39.7	109.2	1	4
Lowland_trop_rainf_(Montagne_Tortue_FG)	213	Micropholis.guyanensis	60	105.1	1	5
Lowland_trop_rainf_(Montagne_Tortue_FG)	213	Qualea.rosea	15.3	116.2	1	1
Lowland_trop_rainf_(Montagne_Tortue_FG)	213	Qualea.rosea	15.3	96	1	2
Lowland_trop_rainf_(Montagne_Tortue_FG)	213	Qualea.rosea	16.2	154.6	1	3
Lowland_trop_rainf_(Montagne_Tortue_FG)	213	Qualea.rosea	19.2	123.8	1	4
Lowland_trop_rainf_(Montagne_Tortue_FG)	213	Qualea.rosea	19.2	144.6	1	5
Lowland_trop_rainf_(Nouragues_FG)	197	Amphirrhox.longifolia	33.9	242.1	1	1
Lowland_trop_rainf_(Nouragues_FG)	197	Amphirrhox.longifolia	22.8	231.1	1	2
Lowland_trop_rainf_(Nouragues_FG)	197	Amphirrhox.longifolia	25	188.7	1	3
Lowland_trop_rainf_(Nouragues_FG)	197	Amphirrhox.longifolia	28.7	168.8	1	4
Lowland_trop_rainf_(Nouragues_FG)	197	Amphirrhox.longifolia	28.6	197	1	5
Lowland_trop_rainf_(Nouragues_FG)	197	Conceveiba.guianensis	188.7	109	1	1
Lowland_trop_rainf_(Nouragues_FG)	197	Conceveiba.guianensis	103.8	114.7	1	2
Lowland_trop_rainf_(Nouragues_FG)	197	Conceveiba.guianensis	113.2	206.9	1	3
Lowland_trop_rainf_(Nouragues_FG)	197	Conceveiba.guianensis	91.7	117.1	1	4
Lowland_trop_rainf_(Nouragues_FG)	197	Conceveiba.guianensis	190.4	123.7	1	5
Lowland_trop_rainf_(Nouragues_FG)	197	Cupania.scrobiculata	41.5	147.6	1	1
Lowland_trop_rainf_(Nouragues_FG)	197	Cupania.scrobiculata	66.5	240.4	1	2
Lowland_trop_rainf_(Nouragues_FG)	197	Cupania.scrobiculata	51.3	161.1	1	3
Lowland_trop_rainf_(Nouragues_FG)	197	Cupania.scrobiculata	29.9	158.2	1	4
Lowland_trop_rainf_(Nouragues_FG)	197	Cupania.scrobiculata	45.5	280.1	1	5
Lowland_trop_rainf_(Nouragues_FG)	197	Ocotea.subterminalis	129.3	97.4	1	1
Lowland_trop_rainf_(Nouragues_FG)	197	Ocotea.subterminalis	113	102.4	1	2
Lowland_trop_rainf_(Nouragues_FG)	197	Ocotea.subterminalis	43.8	55.3	1	3
Lowland_trop_rainf_(Nouragues_FG)	197	Ocotea.subterminalis	130.1	75.9	1	4
Lowland_trop_rainf_(Nouragues_FG)	197	Ocotea.subterminalis	55	65.2	1	5
Lowland_trop_rainf_(Paracaou_FG)	150	Chaetocarpus_schomburgkianus	49.2	52.8	1	1
Lowland_trop_rainf_(Paracaou_FG)	150	Chaetocarpus_schomburgkianus	31.5	64	1	2
Lowland_trop_rainf_(Paracaou_FG)	150	Chaetocarpus_schomburgkianus	101.9	57.6	1	3
Lowland_trop_rainf_(Paracaou_FG)	150	Chaetocarpus_schomburgkianus	81	60.1	1	4
Lowland_trop_rainf_(Paracaou_FG)	150	Chaetocarpus_schomburgkianus	75.7	57.8	1	5
Lowland_trop_rainf_(Paracaou_FG)	150	Conceveiba_guianensis	49.2	81.9	1	1
Lowland_trop_rainf_(Paracaou_FG)	150	Conceveiba_guianensis	90.4	101.3	1	2
Lowland_trop_rainf_(Paracaou_FG)	150	Conceveiba_guianensis	118.8	113.1	1	3
Lowland_trop_rainf_(Paracaou_FG)	150	Conceveiba_guianensis	118.7	85.9	1	4
Lowland_trop_rainf_(Paracaou_FG)	150	Conceveiba_guianensis	80.8	102.6	1	5
Lowland_trop_rainf_(Paracaou_FG)	150	Dicorynia_guianensis	89.3	98.3	1	1
Lowland_trop_rainf_(Paracaou_FG)	150	Dicorynia_guianensis	53.4	138.2	1	2
Lowland_trop_rainf_(Paracaou_FG)	150	Dicorynia_guianensis	123	130.6	1	3
Lowland_trop_rainf_(Paracaou_FG)	150	Dicorynia_guianensis	158.4	173.7	1	4
Lowland_trop_rainf_(Paracaou_FG)	150	Dicorynia_guianensis	30.4	100.7	1	5
Lowland_trop_rainf_(Paracaou_FG)	150	Eschweilera_sagotiana	43.8	75.9	1	1
Lowland_trop_rainf_(Paracaou_FG)	150	Eschweilera_sagotiana	102.7	73.6	1	2
Lowland_trop_rainf_(Paracaou_FG)	150	Eschweilera_sagotiana	53.4	85.2	1	3
Lowland_trop_rainf_(Paracaou_FG)	150	Eschweilera_sagotiana	73.5	69.5	1	4
Lowland_trop_rainf_(Paracaou_FG)	150	Eschweilera_sagotiana	65.8	75.5	1	5
Lowland_trop_rainf_(Paracaou_FG)	150	Miconia_acuminata	70	97.5	1	1
Lowland_trop_rainf_(Paracaou_FG)	150	Miconia_acuminata	51.2	121.8	1	2
Lowland_trop_rainf_(Paracaou_FG)	150	Miconia_acuminata	79	96.2	1	3
Lowland_trop_rainf_(Paracaou_FG)	150	Miconia_acuminata	46.5	112.5	1	4
Lowland_trop_rainf_(Paracaou_FG)	150	Miconia_acuminata	51.9	116.1	1	5
Lowland_trop_rainf_(Paracaou_FG)	150	Protium_opacum	71.3	93.7	1	1
Lowland_trop_rainf_(Paracaou_FG)	150	Protium_opacum	75.6	66	1	2
Lowland_trop_rainf_(Paracaou_FG)	150	Protium_opacum	40	85	1	3
Lowland_trop_rainf_(Paracaou_FG)	150	Protium_opacum	224.7	263.3	1	4
Lowland_trop_rainf_(Paracaou_FG)	150	Protium_opacum	143.9	114	1	5
Lowland_trop_rainf_(Saut_Lavilette_FG)	224	Lecythis.persistens	116.2	88.5	1	1
Lowland_trop_rainf_(Saut_Lavilette_FG)	224	Lecythis.persistens	131.8	71.2	1	2
Lowland_trop_rainf_(Saut_Lavilette_FG)	224	Lecythis.persistens	170.3	70.6	1	3
Lowland_trop_rainf_(Saut_Lavilette_FG)	224	Lecythis.persistens	124.8	69.4	1	4
Lowland_trop_rainf_(Saut_Lavilette_FG)	224	Lecythis.persistens	124.7	82.6	1	5
Lowland_trop_rainf_(Saut_Lavilette_FG)	224	Naucleopsis.guianensis	40.1	124	1	1
Lowland_trop_rainf_(Saut_Lavilette_FG)	224	Naucleopsis.guianensis	21	145.5	1	2
Lowland_trop_rainf_(Saut_Lavilette_FG)	224	Naucleopsis.guianensis	36	109.7	1	3
Lowland_trop_rainf_(Saut_Lavilette_FG)	224	Naucleopsis.guianensis	28	106.1	1	4
Lowland_trop_rainf_(Saut_Lavilette_FG)	224	Naucleopsis.guianensis	21.4	116.5	1	5
Lowland_trop_rainf_(Saut_Lavilette_FG)	224	Pouteria.singularis	47	105.7	1	1
Lowland_trop_rainf_(Saut_Lavilette_FG)	224	Pouteria.singularis	45.5	125.1	1	2
Lowland_trop_rainf_(Saut_Lavilette_FG)	224	Pouteria.singularis	35.3	161.6	1	3
Lowland_trop_rainf_(Saut_Lavilette_FG)	224	Pouteria.singularis	50.5	161	1	4
Lowland_trop_rainf_(Saut_Lavilette_FG)	224	Pouteria.singularis	86.8	150.6	1	5
Medit_mixed_(Spain)	3	Q.faginea	3.65	80.4003	1	1
Medit_mixed_(Spain)	3	Q.faginea	2.67333	91.1429	1	2
Medit_mixed_(Spain)	3	Q.faginea	2.81	100.994	1	3
Medit_mixed_(Spain)	3	Q.faginea	3.87	88.5538	1	4
Medit_mixed_(Spain)	3	Q.faginea	3.59333	86.8056	1	5
Mount_beech_(Romania)	4	acps	108.323	353.051	1	1
Mount_beech_(Romania)	4	acps	35.6423	357.743	1	2
Mount_beech_(Romania)	4	acps	42.8593	354.011	1	3
Mount_beech_(Romania)	4	acps	68.06	402.3	1	4
Mount_beech_(Romania)	4	acps	65.16	278.967	1	5
Trop_dry_deciduous_(Bolivia)	34	Anadenanthera.colubrina.................	0.0263188	147.772	1	1
Trop_dry_deciduous_(Bolivia)	34	Anadenanthera.colubrina.................	0.0263188	161.522	1	2
Trop_dry_deciduous_(Bolivia)	34	Anadenanthera.colubrina.................	0.0306444	157.6	1	3
Trop_dry_deciduous_(Bolivia)	34	Anadenanthera.colubrina.................	0.0311643	172.283	1	4
Trop_dry_deciduous_(Bolivia)	34	Anadenanthera.colubrina.................	0.0244483	144.331	1	5
Trop_dry_deciduous_(Bolivia)	34	Cariniana.ianeirensis	46.4971	259.95	1	1
Trop_dry_deciduous_(Bolivia)	34	Cariniana.ianeirensis	60.5007	169.355	1	2
Trop_dry_deciduous_(Bolivia)	34	Cariniana.ianeirensis	103.092	180.66	1	3
Trop_dry_deciduous_(Bolivia)	34	Cariniana.ianeirensis	76.1602	220.447	1	4
Trop_dry_deciduous_(Bolivia)	34	Cariniana.ianeirensis	66.5489	233.633	1	5
Trop_dry_deciduous_(Bolivia)	34	Cecropia.concolor.......................	207.804	164.924	1	1
Trop_dry_deciduous_(Bolivia)	34	Cecropia.concolor.......................	158.455	163.355	1	2
Trop_dry_deciduous_(Bolivia)	34	Cecropia.concolor.......................	30.476	156.287	1	3
Trop_dry_deciduous_(Bolivia)	34	Cecropia.concolor.......................	78.8707	203.725	1	4
Trop_dry_deciduous_(Bolivia)	34	Cecropia.concolor.......................	131.085	182.062	1	5
Trop_dry_deciduous_(Bolivia)	34	Ceiba.boliviana	19.1742	182.385	1	1
Trop_dry_deciduous_(Bolivia)	34	Ceiba.boliviana	23.0715	148.623	1	2
Trop_dry_deciduous_(Bolivia)	34	Ceiba.boliviana	16.6901	216.155	1	3
Trop_dry_deciduous_(Bolivia)	34	Ceiba.boliviana	19.6918	181.435	1	4
Trop_dry_deciduous_(Bolivia)	34	Ceiba.boliviana	19.706	167.405	1	5
Trop_dry_deciduous_(Bolivia)	34	Ceiba.speciosa..........................	17.9268	193.803	1	1
Trop_dry_deciduous_(Bolivia)	34	Ceiba.speciosa..........................	13.6956	280.935	1	2
Trop_dry_deciduous_(Bolivia)	34	Ceiba.speciosa..........................	18.3464	268.484	1	3
Trop_dry_deciduous_(Bolivia)	34	Ceiba.speciosa..........................	10.9586	246.568	1	4
Trop_dry_deciduous_(Bolivia)	34	Ceiba.speciosa..........................	12.4627	260.848	1	5
Trop_dry_deciduous_(Bolivia)	34	Chrysophyllum.gonocarpon	27.3161	237.24	1	1
Trop_dry_deciduous_(Bolivia)	34	Chrysophyllum.gonocarpon	20.5078	191.612	1	2
Trop_dry_deciduous_(Bolivia)	34	Chrysophyllum.gonocarpon	26.6694	171.273	1	3
Trop_dry_deciduous_(Bolivia)	34	Chrysophyllum.gonocarpon	16.269	236.89	1	4
Trop_dry_deciduous_(Bolivia)	34	Chrysophyllum.gonocarpon	12.2065	364.588	1	5
Trop_dry_deciduous_(Bolivia)	34	Copaifera.chodatiana....................	14.6117	111.176	1	1
Trop_dry_deciduous_(Bolivia)	34	Copaifera.chodatiana....................	8.05369	126.332	1	2
Trop_dry_deciduous_(Bolivia)	34	Copaifera.chodatiana....................	10.1719	133.402	1	3
Trop_dry_deciduous_(Bolivia)	34	Copaifera.chodatiana....................	13.2075	144.457	1	4
Trop_dry_deciduous_(Bolivia)	34	Copaifera.chodatiana....................	17.103	142.525	1	5
Trop_dry_deciduous_(Bolivia)	34	Eriotheca.roseorum	72.6381	208.31	1	1
Trop_dry_deciduous_(Bolivia)	34	Eriotheca.roseorum	94.2473	153.95	1	2
Trop_dry_deciduous_(Bolivia)	34	Eriotheca.roseorum	135.496	214.99	1	3
Trop_dry_deciduous_(Bolivia)	34	Eriotheca.roseorum	62.2712	151.127	1	4
Trop_dry_deciduous_(Bolivia)	34	Eriotheca.roseorum	74.8173	167.642	1	5
Trop_dry_deciduous_(Bolivia)	34	Esenbeckia.almawillia	8.27613	129.155	1	1
Trop_dry_deciduous_(Bolivia)	34	Esenbeckia.almawillia	10.68	133.17	1	2
Trop_dry_deciduous_(Bolivia)	34	Esenbeckia.almawillia	8.77685	199.087	1	3
Trop_dry_deciduous_(Bolivia)	34	Esenbeckia.almawillia	7.48588	152.385	1	4
Trop_dry_deciduous_(Bolivia)	34	Esenbeckia.almawillia	8.25978	169.175	1	5
Trop_dry_deciduous_(Bolivia)	34	Guibourtia.chodatiana	20.8458	136.967	1	1
Trop_dry_deciduous_(Bolivia)	34	Guibourtia.chodatiana	12.6551	132.343	1	2
Trop_dry_deciduous_(Bolivia)	34	Guibourtia.chodatiana	16.1573	116.782	1	3
Trop_dry_deciduous_(Bolivia)	34	Guibourtia.chodatiana	21.0555	126.017	1	4
Trop_dry_deciduous_(Bolivia)	34	Guibourtia.chodatiana	10.9233	122.707	1	5
Trop_dry_deciduous_(Bolivia)	34	Hymenaea.courbaril......................	45.3363	132.369	1	1
Trop_dry_deciduous_(Bolivia)	34	Hymenaea.courbaril......................	27.2588	132.97	1	2
Trop_dry_deciduous_(Bolivia)	34	Hymenaea.courbaril......................	26.4219	113.643	1	3
Trop_dry_deciduous_(Bolivia)	34	Hymenaea.courbaril......................	21.5812	124.03	1	4
Trop_dry_deciduous_(Bolivia)	34	Hymenaea.courbaril......................	24.133	135.579	1	5
Trop_dry_deciduous_(Bolivia)	34	Machaerium.scleroxylon	3.30197	125.789	1	1
Trop_dry_deciduous_(Bolivia)	34	Machaerium.scleroxylon	2.84612	149.998	1	2
Trop_dry_deciduous_(Bolivia)	34	Machaerium.scleroxylon	3.33373	115.956	1	3
Trop_dry_deciduous_(Bolivia)	34	Machaerium.scleroxylon	3.76152	139.03	1	4
Trop_dry_deciduous_(Bolivia)	34	Machaerium.scleroxylon	3.63625	111.124	1	5
Trop_dry_deciduous_(Bolivia)	34	Myrciaria.sp.	4.3476	154.667	1	1
Trop_dry_deciduous_(Bolivia)	34	Myrciaria.sp.	3.64272	261.255	1	2
Trop_dry_deciduous_(Bolivia)	34	Myrciaria.sp.	6.26265	461.745	1	3
Trop_dry_deciduous_(Bolivia)	34	Myrciaria.sp.	6.67964	304.592	1	4
Trop_dry_deciduous_(Bolivia)	34	Myrciaria.sp.	9.67283	278.15	1	5
Trop_dry_deciduous_(Bolivia)	34	Neea.cf..steinbachii....................	23.17	171.629	1	1
Trop_dry_deciduous_(Bolivia)	34	Neea.cf..steinbachii....................	26.068	142.839	1	2
Trop_dry_deciduous_(Bolivia)	34	Neea.cf..steinbachii....................	25.4475	137.554	1	3
Trop_dry_deciduous_(Bolivia)	34	Neea.cf..steinbachii....................	28.4578	121.097	1	4
Trop_dry_deciduous_(Bolivia)	34	Neea.cf..steinbachii....................	24.0273	171.624	1	5
Trop_dry_deciduous_(Bolivia)	34	Neea.sp.	18.3228	180.093	1	1
Trop_dry_deciduous_(Bolivia)	34	Neea.sp.	20.4997	164.8	1	2
Trop_dry_deciduous_(Bolivia)	34	Neea.sp.	28.7096	156.762	1	3
Trop_dry_deciduous_(Bolivia)	34	Neea.sp.	27.0333	153.448	1	4
Trop_dry_deciduous_(Bolivia)	34	Neea.sp.	24.3781	92.3925	1	5
Trop_dry_deciduous_(Bolivia)	34	Phyllanthus.sp.	15.1055	318.58	1	1
Trop_dry_deciduous_(Bolivia)	34	Phyllanthus.sp.	20.3885	271.353	1	2
Trop_dry_deciduous_(Bolivia)	34	Phyllanthus.sp.	17.4715	296.477	1	3
Trop_dry_deciduous_(Bolivia)	34	Phyllanthus.sp.	30.3995	296.595	1	4
Trop_dry_deciduous_(Bolivia)	34	Phyllanthus.sp.	15.2899	308.928	1	5
Trop_dry_deciduous_(Bolivia)	34	Phyllanthus.sp..nov.	8.84486	242.119	1	1
Trop_dry_deciduous_(Bolivia)	34	Phyllanthus.sp..nov.	6.29081	221.951	1	2
Trop_dry_deciduous_(Bolivia)	34	Phyllanthus.sp..nov.	7.40803	231.663	1	3
Trop_dry_deciduous_(Bolivia)	34	Phyllanthus.sp..nov.	9.98394	272.129	1	4
Trop_dry_deciduous_(Bolivia)	34	Phyllanthus.sp..nov.	9.45453	241.359	1	5
Trop_dry_deciduous_(Bolivia)	34	Platymiscium.ulei	24.4745	182.275	1	1
Trop_dry_deciduous_(Bolivia)	34	Platymiscium.ulei	24.6435	174.2	1	2
Trop_dry_deciduous_(Bolivia)	34	Platymiscium.ulei	23.2489	207.007	1	3
Trop_dry_deciduous_(Bolivia)	34	Platymiscium.ulei	10.8404	165.292	1	4
Trop_dry_deciduous_(Bolivia)	34	Platymiscium.ulei	6.52472	121.668	1	5
Trop_dry_deciduous_(Bolivia)	34	Psidium.sartorianum	8.89376	177.875	1	1
Trop_dry_deciduous_(Bolivia)	34	Psidium.sartorianum	12.7744	177.423	1	2
Trop_dry_deciduous_(Bolivia)	34	Psidium.sartorianum	9.88273	164.948	1	3
Trop_dry_deciduous_(Bolivia)	34	Psidium.sartorianum	11.9103	170.081	1	4
Trop_dry_deciduous_(Bolivia)	34	Psidium.sartorianum	10.8653	170.318	1	5
Trop_dry_deciduous_(Bolivia)	34	Pterogyne.nitens........................	21.462	235.559	1	1
Trop_dry_deciduous_(Bolivia)	34	Pterogyne.nitens........................	15.0255	150.255	1	2
Trop_dry_deciduous_(Bolivia)	34	Pterogyne.nitens........................	13.2844	177.125	1	3
Trop_dry_deciduous_(Bolivia)	34	Pterogyne.nitens........................	16.8159	166.083	1	4
Trop_dry_deciduous_(Bolivia)	34	Pterogyne.nitens........................	14.0512	205.628	1	5
Trop_dry_deciduous_(Bolivia)	34	Rollinia.herzogii.......................	36.2929	93.5383	1	1
Trop_dry_deciduous_(Bolivia)	34	Rollinia.herzogii.......................	26.4885	105.954	1	2
Trop_dry_deciduous_(Bolivia)	34	Rollinia.herzogii.......................	40.6981	141.97	1	3
Trop_dry_deciduous_(Bolivia)	34	Rollinia.herzogii.......................	35.3584	122.986	1	4
Trop_dry_deciduous_(Bolivia)	34	Rollinia.herzogii.......................	49.2758	104.842	1	5
Trop_dry_deciduous_(Bolivia)	34	Schinopsis.brasiliensis	2.93301	195.534	1	1
Trop_dry_deciduous_(Bolivia)	34	Schinopsis.brasiliensis	2.47113	176.509	1	2
Trop_dry_deciduous_(Bolivia)	34	Schinopsis.brasiliensis	2.58124	157.743	1	3
Trop_dry_deciduous_(Bolivia)	34	Schinopsis.brasiliensis	2.04058	177.296	1	4
Trop_dry_deciduous_(Bolivia)	34	Schinopsis.brasiliensis	2.50881	179.201	1	5
Trop_dry_deciduous_(Bolivia)	34	Talisia.esculenta	22.3455	175.772	1	1
Trop_dry_deciduous_(Bolivia)	34	Talisia.esculenta	18.6032	183.67	1	2
Trop_dry_deciduous_(Bolivia)	34	Talisia.esculenta	28.7605	152.735	1	3
Trop_dry_deciduous_(Bolivia)	34	Talisia.esculenta	23.3412	175.54	1	4
Trop_dry_deciduous_(Bolivia)	34	Talisia.esculenta	19.235	210.585	1	5
Trop_semi-deciduous_seasonal_moist_(Panama)	131	Alseis.blackiana	74.3	144.4	1	1
Trop_semi-deciduous_seasonal_moist_(Panama)	131	Alseis.blackiana	72.71	158.08	1	2
Trop_semi-deciduous_seasonal_moist_(Panama)	131	Alseis.blackiana	86.29	159.6	1	3
Trop_semi-deciduous_seasonal_moist_(Panama)	131	Alseis.blackiana	74.3	148.96	1	4
Trop_semi-deciduous_seasonal_moist_(Panama)	131	Alseis.blackiana	76.7	153.52	1	5
Trop_semi-deciduous_seasonal_moist_(Panama)	131	Croton.billbergianus	219.9	223.71	1	1
Trop_semi-deciduous_seasonal_moist_(Panama)	131	Croton.billbergianus	218.69	266.15	1	2
Trop_semi-deciduous_seasonal_moist_(Panama)	131	Croton.billbergianus	235.92	297.77	1	3
Trop_semi-deciduous_seasonal_moist_(Panama)	131	Croton.billbergianus	181.77	275.42	1	4
Trop_semi-deciduous_seasonal_moist_(Panama)	131	Croton.billbergianus	181.77	275.42	1	5
Trop_semi-deciduous_seasonal_moist_(Panama)	131	Erythrina.costaricensis	206.1	265.36	1	1
Trop_semi-deciduous_seasonal_moist_(Panama)	131	Erythrina.costaricensis	209.16	471.78	1	2
Trop_semi-deciduous_seasonal_moist_(Panama)	131	Erythrina.costaricensis	301.18	358.54	1	3
Trop_semi-deciduous_seasonal_moist_(Panama)	131	Erythrina.costaricensis	170.52	390.5	1	4
Trop_semi-deciduous_seasonal_moist_(Panama)	131	Erythrina.costaricensis	123.61	353.17	1	5
Trop_semi-deciduous_seasonal_moist_(Panama)	131	Eugenia.nesiotica	13.34	205.88	1	1
Trop_semi-deciduous_seasonal_moist_(Panama)	131	Eugenia.nesiotica	15.15	189.99	1	2
Trop_semi-deciduous_seasonal_moist_(Panama)	131	Eugenia.nesiotica	7.65	236.95	1	3
Trop_semi-deciduous_seasonal_moist_(Panama)	131	Eugenia.nesiotica	10.18	226.3	1	4
Trop_semi-deciduous_seasonal_moist_(Panama)	131	Eugenia.nesiotica	12.16	195.45	1	5
Trop_semi-deciduous_seasonal_moist_(Panama)	131	Gustavia.superba	260.65	127.14	1	1
Trop_semi-deciduous_seasonal_moist_(Panama)	131	Gustavia.superba	236.39	150.57	1	2
Trop_semi-deciduous_seasonal_moist_(Panama)	131	Gustavia.superba	223.02	178.41	1	3
Trop_semi-deciduous_seasonal_moist_(Panama)	131	Gustavia.superba	278.33	189.34	1	4
Trop_semi-deciduous_seasonal_moist_(Panama)	131	Gustavia.superba	359.07	171.8	1	5
Trop_semi-deciduous_seasonal_moist_(Panama)	131	Inga.vera	163.5	181.66	1	1
Trop_semi-deciduous_seasonal_moist_(Panama)	131	Inga.vera	164.18	183.45	1	2
Trop_semi-deciduous_seasonal_moist_(Panama)	131	Inga.vera	203.22	181.58	1	3
Trop_semi-deciduous_seasonal_moist_(Panama)	131	Inga.vera	151.96	194.84	1	4
Trop_semi-deciduous_seasonal_moist_(Panama)	131	Inga.vera	174.41	228.59	1	5
Trop_semi-deciduous_seasonal_moist_(Panama)	131	Luehea.seemannii	53.51	185.22	1	1
Trop_semi-deciduous_seasonal_moist_(Panama)	131	Luehea.seemannii	51.92	200.34	1	2
Trop_semi-deciduous_seasonal_moist_(Panama)	131	Luehea.seemannii	50.33	204.12	1	3
Trop_semi-deciduous_seasonal_moist_(Panama)	131	Luehea.seemannii	55.63	207.9	1	4
Trop_semi-deciduous_seasonal_moist_(Panama)	131	Luehea.seemannii	57.22	179.55	1	5
Trop_semi-deciduous_seasonal_moist_(Panama)	131	Miconia.argentea	130.48	152.32	1	1
Trop_semi-deciduous_seasonal_moist_(Panama)	131	Miconia.argentea	281.57	164.13	1	2
Trop_semi-deciduous_seasonal_moist_(Panama)	131	Miconia.argentea	379.03	169.69	1	3
Trop_semi-deciduous_seasonal_moist_(Panama)	131	Miconia.argentea	310.27	139.4	1	4
Trop_semi-deciduous_seasonal_moist_(Panama)	131	Miconia.argentea	302.27	136.05	1	5
Trop_semi-deciduous_seasonal_moist_(Panama)	131	Terminalia.amazonia	25.66	210.33	1	1
Trop_semi-deciduous_seasonal_moist_(Panama)	131	Terminalia.amazonia	29.37	222.88	1	2
Trop_semi-deciduous_seasonal_moist_(Panama)	131	Terminalia.amazonia	28.64	179.88	1	3
Trop_semi-deciduous_seasonal_moist_(Panama)	131	Terminalia.amazonia	21.88	258.81	1	4
Trop_semi-deciduous_seasonal_moist_(Panama)	131	Terminalia.amazonia	26.12	231.06	1	5
Trop_semi-deciduous_seasonal_moist_(Panama)	131	Xylopia.panamensis	10.01	238.8	1	1
Trop_semi-deciduous_seasonal_moist_(Panama)	131	Xylopia.panamensis	6.22	229.9	1	2
Trop_semi-deciduous_seasonal_moist_(Panama)	131	Xylopia.panamensis	5.89	226.12	1	3
Trop_semi-deciduous_seasonal_moist_(Panama)	131	Xylopia.panamensis	6.52	232.78	1	4
Trop_semi-deciduous_seasonal_moist_(Panama)	131	Xylopia.panamensis	5.22	231.9	1	5
Trop_semi-deciduous_seasonal_moist_(Panama)	131	Zuelania.guidonia	146.05	150.44	1	1
Trop_semi-deciduous_seasonal_moist_(Panama)	131	Zuelania.guidonia	131.87	154.7	1	2
Trop_semi-deciduous_seasonal_moist_(Panama)	131	Zuelania.guidonia	143.22	136.25	1	3
Trop_semi-deciduous_seasonal_moist_(Panama)	131	Zuelania.guidonia	136.13	139.09	1	4
Trop_semi-deciduous_seasonal_moist_(Panama)	131	Zuelania.guidonia	155.98	149.03	1	5

## Sheet: Hoja4
	Valores
Rótulos de fila	Promedio de LA	Desvest de LA
Boreal_(Finland)	7.09044	8.45281
1	7.92802	8.84687
BEPE	15.3246	6.44196
PIAB	0.115173	0.0210806
PISY	0.497888	0.134756
2	6.29694	8.02006
BEPE	14.2087	5.87861
PIAB	0.115895	0.0283175
Evergreen_tropical_rainf_(Ecuador)	130.979	181.928
251	130.979	181.928
ACALCU	80.9475	27.596
ACIDNI	39.312	8.18796
ALLOGL	68.4154	30.8256
ANIBRI	78.1487	32.5025
APEIME	66.3502	25.8446
APHECR	210.443	48.6082
BROWGR	61.0527	19.7925
CAPPSO	86.4176	32.5757
COCCDE	84.4945	19.0809
ESCHCO	107.842	30.3175
EUGEFL	38.5669	11.008
FARACA	45.3554	9.84374
GUAPCL	69.8072	19.8526
GUARGR	261.746	156.854
GUARSI	133.261	32.5299
INGAUM	45.7556	20.4645
IRYAHO	113.501	37.2636
LICANE	81.1084	35.8154
LOZAKL	26.3501	8.66097
MARMBA	1.17643	0.831046
MICOEL	305.303	175.6
MICOTI	227.765	77.2153
MYRCBL	78.1867	19.6578
NECTVI	165.764	35.7697
NEEABA	70.4079	19.5447
NEEAPO	109.951	35.6976
PENTSU	962.831	709.677
PEREXA	80.1664	33.6042
POUTVE	75.1475	25.1877
PRESSC	152.737	57.6031
PROTNO	232.823	83.2389
RINOVI	32.7331	9.06955
SALAAT	155.604	46.9649
SIPABI	214.81	105.751
SIPADE	83.6908	42.7711
SOROST	63.3553	30.8037
UNONVE	191.418	44.59
Lowland_trop_rainf_(Acarouany_FG)	39.6684	28.0943
148	39.6684	28.0943
Poraqueiba.guianensis	70.8688	10.9957
Protium.gallicum	16.9773	4.81653
Lowland_trop_rainf_(BAFOG_FG)	24.9578	15.0133
156	24.9578	15.0133
Iryanthera.sagotiana	38.935	11.7095
Protium.gallicum	13.776	3.4119
Lowland_trop_rainf_(Montagne_Tortue_FG)	433.61	792.904
213	433.61	792.904
Astrocaryum.sciophilum	1170.72	1096.82
Eschweilera.coriacea	88.12	17.2348
Protium.opacum	77.5909	31.6009
Lowland_trop_rainf_(Nouragues_FG)	189.347	270.65
197	189.347	270.65
Astrocaryum.sciophilum	616.057	367.934
Bocoa.prouacensis	55.5692	18.7363
Eschweilera.coriacea	91.9944	29.2289
Gustavia.hexapetala	78.75	25.1622
Jessenia.bataua	635.4	286.766
Lecythis.persistens	124.464	46.6643
Licania.canescens	25.728	6.374
Pouteria.gonggrijpii	63.7	16.356
Quararibea.duckei	97.7286	27.8769
Lowland_trop_rainf_(Paracaou_FG)	54.4004	38.3878
150	54.4004	38.3878
Eperua_falcata	41.4636	10.2601
Eperua_grandiflora	44.79	16.1085
Gustavia_hexapetala	71.5783	27.5388
Iryanthera_hostmannii	66.8083	19.8626
Iryanthera_sagotiana	39.3857	12.9537
Lecythis_persistens	109.438	26.575
Oxandra_asbeckii	23.7538	6.25998
Pogonophora_schomburgkiana	41.25	15.06
Rheedia_madruno	163.12	64.5446
Sandwithia_guianensis	55.6811	25.7867
Tapura_capitulifera	25.5786	7.99896
Tovomita_sp._B1	46.8538	14.1057
Lowland_trop_rainf_(Saut_Lavilette_FG)	21.7679	4.00167
224	21.7679	4.00167
Oxandra.asbeckii	21.7679	4.00167
Medit_mixed_(Spain)	1.33253	1.38998
1	0.794444	0.145823
P.nigra	0.794444	0.145823
2	1.57588	1.63252
P.nigra	0.785857	0.179614
P.sylvestris	0.356923	0.102835
Q.faginea	3.09738	0.884325
Q.ilex	3.96906	2.01874
3	0.992667	0.21252
P.nigra	0.992667	0.21252
Mount_beech_(Romania)	13.6219	16.3427
1	19.1422	24.4613
abal	0.343659	0.0653836
acps	68.9491	23.4034
fasy	14.0672	2.83382
PIAB	0.122865	0.0221503
2	9.98408	7.64912
abal	0.431444	0.100231
fasy	14.5213	4.52412
PIAB	0.134074	0.038535
3	9.4185	7.47575
abal	0.448848	0.14366
fasy	14.5879	3.55165
PIAB	0.158474	0.0433477
4	15.873	2.25408
fasy	15.873	2.25408
Riparian_chaparral_evergreen_(California)	9.31723	10.3676
54	9.31723	10.3676
Acer_negundo_var._californicum	20.0117	5.21582
Adenostoma_fasciculatum	0.0627982	0.0156961
Aesculus_californica	19.4773	8.46232
Artemisia_californica	0.248017	0.158215
Baccharis_pilularis	1.48568	0.687391
Ceanothus_cuneatus_var._cuneatus	0.907992	0.383525
Cercocarpus_betuloides_var._betuloides	1.41447	0.290065
Clematis_lasiantha	6.25047	4.18558
Cotoneaster_pannosa	1.15669	0.337542
Dirca_occidentalis	12.1611	5.6046
Genista_monspessulana	0.888189	0.577752
Heteromeles_arbutifolia	13.9737	6.05166
Lepechinia_calycina	12.1592	10.4899
Lonicera_hispidula_var._vacillans	6.25022	5.07033
Mimulus_aurantiacus	2.33888	1.31524
Prunus_ilicifolia_ssp._ilicifolia	6.94589	3.7847
Quercus_agrifolia__var._agrifolia	11.0448	5.19418
Quercus_douglasii	10.3504	4.32992
Quercus_durata_var._durata	3.1655	1.33751
Quercus_kelloggii	43.6725	13.4161
Quercus_lobata	26.82	22.8022
Rhamnus_californica_ssp._californica	11.4204	2.85309
Rhamnus_crocea	1.14329	0.940939
Ribes_californicum_var._californicum	3.00534	2.80227
Ribes_sanguineum_var._glutinosum	32.4578	16.62
Rubus_ursinus	15.865	7.45137
Salix_lucida_ssp._lasiandra	19.7487	6.81122
Sambucus_mexicana	10.9679	10.0791
Symphoricarpos_albus_var._laevigatus	5.36284	2.76634
Symphoricarpos_mollis	4.87851	3.24558
Toxicodendron_diversilobum	10.5302	5.61162
Umbellularia_californica	16.6304	4.71007
Trop_dry_deciduous_(Bolivia)	49.9153	60.9045
34	49.9153	60.9045
Acosmium.cardenasii	1.12729	0.520938
Actinostemon.concepcionis	8.79102	11.2041
Ampelocera.ruizii	42.5295	7.60293
Aspidosperma.cylindrocarpon	37.8587	9.99325
Aspidosperma.tomentosum	28.9129	12.2548
Astronium.urundeuva	16.4045	5.08226
Bougainvillea.modesta	26.3735	10.2313
Caesalpinia.pluviosa	4.35294	3.56286
Capparis.prisca	108.77	51.5162
Casearia.gossypiosperma	24.3478	7.14813
Ceiba.samauma	17.7006	8.46366
Centrolobium.microchaete	32.7273	17.9102
Combretum.leprosum	156.666	93.9198
Erythroxylum.daphnites	9.58093	3.8702
Gallesia.integrifolia	50.1341	16.4111
Jacaratia.sp.	102.603	23.4113
Manihot.guaranitica	154.631	78.4764
Myrciaria.cauliflora	2.99296	1.16308
Ouratea.sp.	65.1719	56.8898
Phyllostylon.rhamnoides	12.742	4.51875
Pogonopus.tubulosus	151.299	67.2848
Simira.rubescens	62.8506	30.072
Solanum.riparium	111.113	67.2897
Spondias.mombin	30.0017	9.91401
Sweetia.fruticosa	5.41893	1.95931
Trichilia.elegans	15.0984	5.70126
Zanthoxylum.monogynum...................	15.1553	6.23168
Total general	56.9878	152.854
Boreal_(Finland)	7.09044	8.45281
1	7.92802	8.84687
BEPE	15.3246	6.44196
PIAB	0.115173	0.0210806
PISY	0.497888	0.134756
2	6.29694	8.02006
BEPE	14.2087	5.87861
PIAB	0.115895	0.0283175
Evergreen_tropical_rainf_(Ecuador)	130.979	181.928
251	130.979	181.928
ACALCU	80.9475	27.596
ACIDNI	39.312	8.18796
ALLOGL	68.4154	30.8256
ANIBRI	78.1487	32.5025
APEIME	66.3502	25.8446
APHECR	210.443	48.6082
BROWGR	61.0527	19.7925
CAPPSO	86.4176	32.5757
COCCDE	84.4945	19.0809
ESCHCO	107.842	30.3175
EUGEFL	38.5669	11.008
FARACA	45.3554	9.84374
GUAPCL	69.8072	19.8526
GUARGR	261.746	156.854
GUARSI	133.261	32.5299
INGAUM	45.7556	20.4645
IRYAHO	113.501	37.2636
LICANE	81.1084	35.8154
LOZAKL	26.3501	8.66097
MARMBA	1.17643	0.831046
MICOEL	305.303	175.6
MICOTI	227.765	77.2153
MYRCBL	78.1867	19.6578
NECTVI	165.764	35.7697
NEEABA	70.4079	19.5447
NEEAPO	109.951	35.6976
PENTSU	962.831	709.677
PEREXA	80.1664	33.6042
POUTVE	75.1475	25.1877
PRESSC	152.737	57.6031
PROTNO	232.823	83.2389
RINOVI	32.7331	9.06955
SALAAT	155.604	46.9649
SIPABI	214.81	105.751
SIPADE	83.6908	42.7711
SOROST	63.3553	30.8037
UNONVE	191.418	44.59
Lowland_trop_rainf_(Acarouany_FG)	39.6684	28.0943
148	39.6684	28.0943
Poraqueiba.guianensis	70.8688	10.9957
Protium.gallicum	16.9773	4.81653
Lowland_trop_rainf_(BAFOG_FG)	24.9578	15.0133
156	24.9578	15.0133
Iryanthera.sagotiana	38.935	11.7095
Protium.gallicum	13.776	3.4119
Lowland_trop_rainf_(Montagne_Tortue_FG)	433.61	792.904
213	433.61	792.904
Astrocaryum.sciophilum	1170.72	1096.82
Eschweilera.coriacea	88.12	17.2348
Protium.opacum	77.5909	31.6009
Lowland_trop_rainf_(Nouragues_FG)	189.347	270.65
197	189.347	270.65
Astrocaryum.sciophilum	616.057	367.934
Bocoa.prouacensis	55.5692	18.7363
Eschweilera.coriacea	91.9944	29.2289
Gustavia.hexapetala	78.75	25.1622
Jessenia.bataua	635.4	286.766
Lecythis.persistens	124.464	46.6643
Licania.canescens	25.728	6.374
Pouteria.gonggrijpii	63.7	16.356
Quararibea.duckei	97.7286	27.8769
Lowland_trop_rainf_(Paracaou_FG)	54.4004	38.3878
150	54.4004	38.3878
Eperua_falcata	41.4636	10.2601
Eperua_grandiflora	44.79	16.1085
Gustavia_hexapetala	71.5783	27.5388
Iryanthera_hostmannii	66.8083	19.8626
Iryanthera_sagotiana	39.3857	12.9537
Lecythis_persistens	109.438	26.575
Oxandra_asbeckii	23.7538	6.25998
Pogonophora_schomburgkiana	41.25	15.06
Rheedia_madruno	163.12	64.5446
Sandwithia_guianensis	55.6811	25.7867
Tapura_capitulifera	25.5786	7.99896
Tovomita_sp._B1	46.8538	14.1057
Lowland_trop_rainf_(Saut_Lavilette_FG)	21.7679	4.00167
224	21.7679	4.00167
Oxandra.asbeckii	21.7679	4.00167
Medit_mixed_(Spain)	1.33253	1.38998
1	0.794444	0.145823
P.nigra	0.794444	0.145823
2	1.57588	1.63252
P.nigra	0.785857	0.179614
P.sylvestris	0.356923	0.102835
Q.faginea	3.09738	0.884325
Q.ilex	3.96906	2.01874
3	0.992667	0.21252
P.nigra	0.992667	0.21252
Mount_beech_(Romania)	13.6219	16.3427
1	19.1422	24.4613
abal	0.343659	0.0653836
acps	68.9491	23.4034
fasy	14.0672	2.83382
PIAB	0.122865	0.0221503
2	9.98408	7.64912
abal	0.431444	0.100231
fasy	14.5213	4.52412
PIAB	0.134074	0.038535
3	9.4185	7.47575
abal	0.448848	0.14366
fasy	14.5879	3.55165
PIAB	0.158474	0.0433477
4	15.873	2.25408
fasy	15.873	2.25408
Riparian_chaparral_evergreen_(California)	9.31723	10.3676
54	9.31723	10.3676
Acer_negundo_var._californicum	20.0117	5.21582
Adenostoma_fasciculatum	0.0627982	0.0156961
Aesculus_californica	19.4773	8.46232
Artemisia_californica	0.248017	0.158215
Baccharis_pilularis	1.48568	0.687391
Ceanothus_cuneatus_var._cuneatus	0.907992	0.383525
Cercocarpus_betuloides_var._betuloides	1.41447	0.290065
Clematis_lasiantha	6.25047	4.18558
Cotoneaster_pannosa	1.15669	0.337542
Dirca_occidentalis	12.1611	5.6046
Genista_monspessulana	0.888189	0.577752
Heteromeles_arbutifolia	13.9737	6.05166
Lepechinia_calycina	12.1592	10.4899
Lonicera_hispidula_var._vacillans	6.25022	5.07033
Mimulus_aurantiacus	2.33888	1.31524
Prunus_ilicifolia_ssp._ilicifolia	6.94589	3.7847
Quercus_agrifolia__var._agrifolia	11.0448	5.19418
Quercus_douglasii	10.3504	4.32992
Quercus_durata_var._durata	3.1655	1.33751
Quercus_kelloggii	43.6725	13.4161
Quercus_lobata	26.82	22.8022
Rhamnus_californica_ssp._californica	11.4204	2.85309
Rhamnus_crocea	1.14329	0.940939
Ribes_californicum_var._californicum	3.00534	2.80227
Ribes_sanguineum_var._glutinosum	32.4578	16.62
Rubus_ursinus	15.865	7.45137
Salix_lucida_ssp._lasiandra	19.7487	6.81122
Sambucus_mexicana	10.9679	10.0791
Symphoricarpos_albus_var._laevigatus	5.36284	2.76634
Symphoricarpos_mollis	4.87851	3.24558
Toxicodendron_diversilobum	10.5302	5.61162
Umbellularia_californica	16.6304	4.71007
Trop_dry_deciduous_(Bolivia)	49.9153	60.9045
34	49.9153	60.9045
Acosmium.cardenasii	1.12729	0.520938
Actinostemon.concepcionis	8.79102	11.2041
Ampelocera.ruizii	42.5295	7.60293
Aspidosperma.cylindrocarpon	37.8587	9.99325
Aspidosperma.tomentosum	28.9129	12.2548
Astronium.urundeuva	16.4045	5.08226
Bougainvillea.modesta	26.3735	10.2313
Caesalpinia.pluviosa	4.35294	3.56286
Capparis.prisca	108.77	51.5162
Casearia.gossypiosperma	24.3478	7.14813
Ceiba.samauma	17.7006	8.46366
Centrolobium.microchaete	32.7273	17.9102
Combretum.leprosum	156.666	93.9198
Erythroxylum.daphnites	9.58093	3.8702
Gallesia.integrifolia	50.1341	16.4111
Jacaratia.sp.	102.603	23.4113
Manihot.guaranitica	154.631	78.4764
Myrciaria.cauliflora	2.99296	1.16308
Ouratea.sp.	65.1719	56.8898
Phyllostylon.rhamnoides	12.742	4.51875
Pogonopus.tubulosus	151.299	67.2848
Simira.rubescens	62.8506	30.072
Solanum.riparium	111.113	67.2897
Spondias.mombin	30.0017	9.91401
Sweetia.fruticosa	5.41893	1.95931
Trichilia.elegans	15.0984	5.70126
Zanthoxylum.monogynum...................	15.1553	6.23168
Total general	56.9878	152.854

## Sheet: >10ind
site	richness	sps	LA	SLA		site	richness	sps	SLA
Boreal_(Finland)	1	BEPE	12.9762	198.984		Boreal_(Finland)	1	BEPE	198.984
Boreal_(Finland)	1	BEPE	33.503	240.243		Boreal_(Finland)	1	BEPE	240.243
Boreal_(Finland)	1	BEPE	17.3703	216.579		Boreal_(Finland)	1	BEPE	216.579
Boreal_(Finland)	1	BEPE	26.5335	244.01		Boreal_(Finland)	1	BEPE	244.01
Boreal_(Finland)	1	PISY	0.7956	68.8424		Boreal_(Finland)	1	PISY	68.8424
Boreal_(Finland)	1	BEPE	17.3711	275.742		Boreal_(Finland)	1	BEPE	275.742
Boreal_(Finland)	1	PIAB	0.127697	70.9426		Boreal_(Finland)	1	PIAB	70.9426
Boreal_(Finland)	1	BEPE	37.9083	239.18		Boreal_(Finland)	1	BEPE	239.18
Boreal_(Finland)	1	PISY	0.382423	61.2709		Boreal_(Finland)	1	PISY	61.2709
Boreal_(Finland)	1	BEPE	26.9258	322.799		Boreal_(Finland)	1	BEPE	322.799
Boreal_(Finland)	1	PISY	0.370233	37.0233		Boreal_(Finland)	1	PISY	37.0233
Boreal_(Finland)	1	BEPE	11.9817	155.603		Boreal_(Finland)	1	BEPE	155.603
Boreal_(Finland)	1	PIAB	0.09299	51.6611		Boreal_(Finland)	1	PIAB	51.6611
Boreal_(Finland)	1	BEPE	14.7477	204.275		Boreal_(Finland)	1	BEPE	204.275
Boreal_(Finland)	1	BEPE	18.7483	232.786		Boreal_(Finland)	1	BEPE	232.786
Boreal_(Finland)	1	BEPE	31.2563	268.804		Boreal_(Finland)	1	BEPE	268.804
Boreal_(Finland)	1	BEPE	20.5622	232.073		Boreal_(Finland)	1	BEPE	232.073
Boreal_(Finland)	1	PIAB	0.13208	82.55		Boreal_(Finland)	1	PIAB	82.55
Boreal_(Finland)	1	BEPE	19.101	268.708		Boreal_(Finland)	1	BEPE	268.708
Boreal_(Finland)	1	PIAB	0.110973	55.4863		Boreal_(Finland)	1	PIAB	55.4863
Boreal_(Finland)	1	BEPE	12.9625	250.211		Boreal_(Finland)	1	BEPE	250.211
Boreal_(Finland)	1	BEPE	9.34953	201.808		Boreal_(Finland)	1	BEPE	201.808
Boreal_(Finland)	1	PIAB	0.134287	47.9595		Boreal_(Finland)	1	PIAB	47.9595
Boreal_(Finland)	1	BEPE	11.2682	238.485		Boreal_(Finland)	1	BEPE	238.485
Boreal_(Finland)	1	BEPE	10.9017	217.746		Boreal_(Finland)	1	BEPE	217.746
Boreal_(Finland)	1	PIAB	0.132417	47.2917		Boreal_(Finland)	1	PIAB	47.2917
Boreal_(Finland)	1	PISY	0.774493	77.3692		Boreal_(Finland)	1	PISY	77.3692
Boreal_(Finland)	1	PIAB	0.124993	56.8152		Boreal_(Finland)	1	PIAB	56.8152
Boreal_(Finland)	1	PISY	0.4485	72.1077		Boreal_(Finland)	1	PISY	72.1077
Boreal_(Finland)	1	BEPE	10.9222	190.502		Boreal_(Finland)	1	BEPE	190.502
Boreal_(Finland)	1	PIAB	0.11315	70.7188		Boreal_(Finland)	1	PIAB	70.7188
Boreal_(Finland)	1	BEPE	24.5302	288.141		Boreal_(Finland)	1	BEPE	288.141
Boreal_(Finland)	1	PIAB	0.116907	53.1394		Boreal_(Finland)	1	PIAB	53.1394
Boreal_(Finland)	1	BEPE	25.5067	231.569		Boreal_(Finland)	1	BEPE	231.569
Boreal_(Finland)	1	PIAB	0.104174	57.8744		Boreal_(Finland)	1	PIAB	57.8744
Boreal_(Finland)	1	PISY	0.489106	68.988		Boreal_(Finland)	1	PISY	68.988
Boreal_(Finland)	1	BEPE	19.6094	251.387		Boreal_(Finland)	1	BEPE	251.387
Boreal_(Finland)	1	BEPE	11.1378	282.834		Boreal_(Finland)	1	BEPE	282.834
Boreal_(Finland)	1	BEPE	12.017	174.638		Boreal_(Finland)	1	BEPE	174.638
Boreal_(Finland)	1	BEPE	16.4888	239.176		Boreal_(Finland)	1	BEPE	239.176
Boreal_(Finland)	1	BEPE	10.8933	211.544		Boreal_(Finland)	1	BEPE	211.544
Boreal_(Finland)	1	BEPE	10.1526	205.184		Boreal_(Finland)	1	BEPE	205.184
Boreal_(Finland)	1	BEPE	15.6897	240.152		Boreal_(Finland)	1	BEPE	240.152
Boreal_(Finland)	1	BEPE	13.4871	209.092		Boreal_(Finland)	1	BEPE	209.092
Boreal_(Finland)	1	PIAB	0.110783	92.3194		Boreal_(Finland)	1	PIAB	92.3194
Boreal_(Finland)	1	PIAB	0.136583	85.3646		Boreal_(Finland)	1	PIAB	85.3646
Boreal_(Finland)	1	PISY	0.370263	81.7164		Boreal_(Finland)	1	PISY	81.7164
Boreal_(Finland)	1	PISY	0.567683	68.9845		Boreal_(Finland)	1	PISY	68.9845
Boreal_(Finland)	1	BEPE	12.5284	219.701		Boreal_(Finland)	1	BEPE	219.701
Boreal_(Finland)	1	PIAB	0.150303	46.9698		Boreal_(Finland)	1	PIAB	46.9698
Boreal_(Finland)	1	BEPE	11.873	294.587		Boreal_(Finland)	1	BEPE	294.587
Boreal_(Finland)	1	BEPE	14.641	319.405		Boreal_(Finland)	1	BEPE	319.405
Boreal_(Finland)	1	PIAB	0.0713267	59.4389		Boreal_(Finland)	1	PIAB	59.4389
Boreal_(Finland)	1	BEPE	17.3274	300.086		Boreal_(Finland)	1	BEPE	300.086
Boreal_(Finland)	1	PIAB	0.103343	51.6717		Boreal_(Finland)	1	PIAB	51.6717
Boreal_(Finland)	1	PIAB	0.0982	61.375		Boreal_(Finland)	1	PIAB	61.375
Boreal_(Finland)	1	PISY	0.38453	70.1475		Boreal_(Finland)	1	PISY	70.1475
Boreal_(Finland)	1	PIAB	0.100757	65.8794		Boreal_(Finland)	1	PIAB	65.8794
Boreal_(Finland)	1	BEPE	8.6192	243.425		Boreal_(Finland)	1	BEPE	243.425
Boreal_(Finland)	1	BEPE	12.751	187.093		Boreal_(Finland)	1	BEPE	187.093
Boreal_(Finland)	1	BEPE	11.9958	187.978		Boreal_(Finland)	1	BEPE	187.978
Boreal_(Finland)	1	BEPE	12.3756	178.75		Boreal_(Finland)	1	BEPE	178.75
Boreal_(Finland)	1	BEPE	15.1566	236.435		Boreal_(Finland)	1	BEPE	236.435
Boreal_(Finland)	1	PIAB	0.121863	60.9317		Boreal_(Finland)	1	PIAB	60.9317
Boreal_(Finland)	1	BEPE	12.3887	213.586		Boreal_(Finland)	1	BEPE	213.586
Boreal_(Finland)	1	PIAB	0.0999133	83.2611		Boreal_(Finland)	1	PIAB	83.2611
Boreal_(Finland)	1	PIAB	0.143387	71.6933		Boreal_(Finland)	1	PIAB	71.6933
Boreal_(Finland)	1	PIAB	0.101263	50.6317		Boreal_(Finland)	1	PIAB	50.6317
Boreal_(Finland)	1	PIAB	0.103407	64.6292		Boreal_(Finland)	1	PIAB	64.6292
Boreal_(Finland)	1	PISY	0.580067	79.4555		Boreal_(Finland)	1	PISY	79.4555
Boreal_(Finland)	1	PIAB	0.139737	58.2236		Boreal_(Finland)	1	PIAB	58.2236
Boreal_(Finland)	1	BEPE	12.9265	212.493		Boreal_(Finland)	1	BEPE	212.493
Boreal_(Finland)	1	BEPE	10.109	341.11		Boreal_(Finland)	1	BEPE	341.11
Boreal_(Finland)	1	PIAB	0.146657	91.6604		Boreal_(Finland)	1	PIAB	91.6604
Boreal_(Finland)	1	BEPE	11.0303	284.533		Boreal_(Finland)	1	BEPE	284.533
Boreal_(Finland)	1	PIAB	0.12283	46.0613		Boreal_(Finland)	1	PIAB	46.0613
Boreal_(Finland)	1	PISY	0.6163	87.1304		Boreal_(Finland)	1	PISY	87.1304
Boreal_(Finland)	1	PIAB	0.136673	52.5667		Boreal_(Finland)	1	PIAB	52.5667
Boreal_(Finland)	1	BEPE	13.686	242.25		Boreal_(Finland)	1	BEPE	242.25
Boreal_(Finland)	1	BEPE	14.1947	257.033		Boreal_(Finland)	1	BEPE	257.033
Boreal_(Finland)	1	BEPE	9.25488	218.995		Boreal_(Finland)	1	BEPE	218.995
Boreal_(Finland)	1	BEPE	9.57113	319.884		Boreal_(Finland)	1	BEPE	319.884
Boreal_(Finland)	1	BEPE	19.8689	221.227		Boreal_(Finland)	1	BEPE	221.227
Boreal_(Finland)	1	PISY	0.473455	92.0446		Boreal_(Finland)	1	PISY	92.0446
Boreal_(Finland)	1	BEPE	13.7075	224.247		Boreal_(Finland)	1	BEPE	224.247
Boreal_(Finland)	1	BEPE	15.7904	231.108		Boreal_(Finland)	1	BEPE	231.108
Boreal_(Finland)	1	BEPE	11.9921	285.26		Boreal_(Finland)	1	BEPE	285.26
Boreal_(Finland)	1	PIAB	0.05394	67.425		Boreal_(Finland)	1	PIAB	67.425
Boreal_(Finland)	1	PISY	0.301033	79.1409		Boreal_(Finland)	1	PISY	79.1409
Boreal_(Finland)	1	PIAB	0.108767	45.3194		Boreal_(Finland)	1	PIAB	45.3194
Boreal_(Finland)	1	PISY	0.562468	91.4904		Boreal_(Finland)	1	PISY	91.4904
Boreal_(Finland)	1	BEPE	15.9206	224.73		Boreal_(Finland)	1	BEPE	224.73
Boreal_(Finland)	1	PIAB	0.105253	65.7833		Boreal_(Finland)	1	PIAB	65.7833
Boreal_(Finland)	1	PISY	0.4182	84.0812		Boreal_(Finland)	1	PISY	84.0812
Boreal_(Finland)	1	PISY	0.495853	91.9939		Boreal_(Finland)	1	PISY	91.9939
Boreal_(Finland)	1	PIAB	0.136607	48.7881		Boreal_(Finland)	1	PIAB	48.7881
Boreal_(Finland)	1	PIAB	0.117577	83.9833		Boreal_(Finland)	1	PIAB	83.9833
Boreal_(Finland)	1	BEPE	8.7069	362.787		Boreal_(Finland)	1	BEPE	362.787
Boreal_(Finland)	1	BEPE	12.0951	208.117		Boreal_(Finland)	1	BEPE	208.117
Boreal_(Finland)	1	PIAB	0.103217	86.0139		Boreal_(Finland)	1	PIAB	86.0139
Boreal_(Finland)	1	PIAB	0.09276	51.5333		Boreal_(Finland)	1	PIAB	51.5333
Boreal_(Finland)	1	BEPE	9.10005	252.845		Boreal_(Finland)	1	BEPE	252.845
Boreal_(Finland)	1	PISY	0.497363	87.2894		Boreal_(Finland)	1	PISY	87.2894
Boreal_(Finland)	1	PISY	0.573167	77.7894		Boreal_(Finland)	1	PISY	77.7894
Boreal_(Finland)	1	BEPE	7.23061	200.528		Boreal_(Finland)	1	BEPE	200.528
Boreal_(Finland)	1	PISY	0.359137	99.0013		Boreal_(Finland)	1	PISY	99.0013
Boreal_(Finland)	1	BEPE	14.1069	304.32		Boreal_(Finland)	1	BEPE	304.32
Boreal_(Finland)	1	PIAB	0.12106	151.325		Boreal_(Finland)	1	PIAB	151.325
Boreal_(Finland)	2	BEPE	12.1721	203.294		Boreal_(Finland)	2	BEPE	203.294
Boreal_(Finland)	2	BEPE	8.03787	211.571		Boreal_(Finland)	2	BEPE	211.571
Boreal_(Finland)	2	BEPE	10.7036	208.731		Boreal_(Finland)	2	BEPE	208.731
Boreal_(Finland)	2	BEPE	12.6785	204.888		Boreal_(Finland)	2	BEPE	204.888
Boreal_(Finland)	2	PIAB	0.13854	69.27		Boreal_(Finland)	2	PIAB	69.27
Boreal_(Finland)	2	BEPE	12.2467	274.732		Boreal_(Finland)	2	BEPE	274.732
Boreal_(Finland)	2	BEPE	14.0671	239.142		Boreal_(Finland)	2	BEPE	239.142
Boreal_(Finland)	2	BEPE	12.2592	213.79		Boreal_(Finland)	2	BEPE	213.79
Boreal_(Finland)	2	BEPE	9.76187	220.993		Boreal_(Finland)	2	BEPE	220.993
Boreal_(Finland)	2	BEPE	12.126	210.951		Boreal_(Finland)	2	BEPE	210.951
Boreal_(Finland)	2	BEPE	10.8901	277.574		Boreal_(Finland)	2	BEPE	277.574
Boreal_(Finland)	2	BEPE	9.26572	229.233		Boreal_(Finland)	2	BEPE	229.233
Boreal_(Finland)	2	PIAB	0.07877	98.4625		Boreal_(Finland)	2	PIAB	98.4625
Boreal_(Finland)	2	PIAB	0.10532	75.2286		Boreal_(Finland)	2	PIAB	75.2286
Boreal_(Finland)	2	BEPE	11.947	211.446		Boreal_(Finland)	2	BEPE	211.446
Boreal_(Finland)	2	BEPE	9.51497	204.993		Boreal_(Finland)	2	BEPE	204.993
Boreal_(Finland)	2	PIAB	0.0691667	38.4259		Boreal_(Finland)	2	PIAB	38.4259
Boreal_(Finland)	2	BEPE	10.0036	197.408		Boreal_(Finland)	2	BEPE	197.408
Boreal_(Finland)	2	BEPE	12.1249	189.878		Boreal_(Finland)	2	BEPE	189.878
Boreal_(Finland)	2	PIAB	0.106933	53.4667		Boreal_(Finland)	2	PIAB	53.4667
Boreal_(Finland)	2	PIAB	0.145867	60.7778		Boreal_(Finland)	2	PIAB	60.7778
Boreal_(Finland)	2	PIAB	0.10716	59.5333		Boreal_(Finland)	2	PIAB	59.5333
Boreal_(Finland)	2	BEPE	9.55647	171.462		Boreal_(Finland)	2	BEPE	171.462
Boreal_(Finland)	2	BEPE	11.1074	212.784		Boreal_(Finland)	2	BEPE	212.784
Boreal_(Finland)	2	BEPE	16.7604	203.882		Boreal_(Finland)	2	BEPE	203.882
Boreal_(Finland)	2	PIAB	0.179	55.9375		Boreal_(Finland)	2	PIAB	55.9375
Boreal_(Finland)	2	BEPE	12.6707	226.357		Boreal_(Finland)	2	BEPE	226.357
Boreal_(Finland)	2	BEPE	14.5396	260.016		Boreal_(Finland)	2	BEPE	260.016
Boreal_(Finland)	2	PIAB	0.133617	83.5104		Boreal_(Finland)	2	PIAB	83.5104
Boreal_(Finland)	2	PIAB	0.208267	61.2549		Boreal_(Finland)	2	PIAB	61.2549
Boreal_(Finland)	2	BEPE	10.7357	251.281		Boreal_(Finland)	2	BEPE	251.281
Boreal_(Finland)	2	PIAB	0.140108	77.8376		Boreal_(Finland)	2	PIAB	77.8376
Boreal_(Finland)	2	PIAB	0.12234	61.17		Boreal_(Finland)	2	PIAB	61.17
Boreal_(Finland)	2	BEPE	24.2558	231.787		Boreal_(Finland)	2	BEPE	231.787
Boreal_(Finland)	2	BEPE	8.41207	211.89		Boreal_(Finland)	2	BEPE	211.89
Boreal_(Finland)	2	BEPE	23.6602	194.218		Boreal_(Finland)	2	BEPE	194.218
Boreal_(Finland)	2	PIAB	0.14963	53.4393		Boreal_(Finland)	2	PIAB	53.4393
Boreal_(Finland)	2	BEPE	8.84133	191.029		Boreal_(Finland)	2	BEPE	191.029
Boreal_(Finland)	2	PIAB	0.137703	62.5924		Boreal_(Finland)	2	PIAB	62.5924
Boreal_(Finland)	2	PIAB	0.105425	65.8904		Boreal_(Finland)	2	PIAB	65.8904
Boreal_(Finland)	2	PIAB	0.131023	65.8409		Boreal_(Finland)	2	PIAB	65.8409
Boreal_(Finland)	2	PIAB	0.07358	61.3167		Boreal_(Finland)	2	PIAB	61.3167
Boreal_(Finland)	2	BEPE	11.9818	242.459		Boreal_(Finland)	2	BEPE	242.459
Boreal_(Finland)	2	PIAB	0.16169	53.8967		Boreal_(Finland)	2	PIAB	53.8967
Boreal_(Finland)	2	BEPE	11.9667	245.474		Boreal_(Finland)	2	BEPE	245.474
Boreal_(Finland)	2	PIAB	0.128733	53.6389		Boreal_(Finland)	2	PIAB	53.6389
Boreal_(Finland)	2	BEPE	9.76633	212.518		Boreal_(Finland)	2	BEPE	212.518
Boreal_(Finland)	2	PIAB	0.069	115		Boreal_(Finland)	2	PIAB	115
Boreal_(Finland)	2	PIAB	0.104467	65.2917		Boreal_(Finland)	2	PIAB	65.2917
Boreal_(Finland)	2	BEPE	9.2066	209.965		Boreal_(Finland)	2	BEPE	209.965
Boreal_(Finland)	2	BEPE	23.3067	196.542		Boreal_(Finland)	2	BEPE	196.542
Boreal_(Finland)	2	PIAB	0.14464	60.2667		Boreal_(Finland)	2	PIAB	60.2667
Boreal_(Finland)	2	PIAB	0.143893	89.9333		Boreal_(Finland)	2	PIAB	89.9333
Boreal_(Finland)	2	PIAB	0.102287	85.2389		Boreal_(Finland)	2	PIAB	85.2389
Boreal_(Finland)	2	PIAB	0.102897	64.3104		Boreal_(Finland)	2	PIAB	64.3104
Boreal_(Finland)	2	BEPE	22.294	248.951		Boreal_(Finland)	2	BEPE	248.951
Boreal_(Finland)	2	BEPE	20.964	213.941		Boreal_(Finland)	2	BEPE	213.941
Boreal_(Finland)	2	PIAB	0.0905567	50.3093		Boreal_(Finland)	2	PIAB	50.3093
Boreal_(Finland)	2	BEPE	16.1148	289.635		Boreal_(Finland)	2	BEPE	289.635
Boreal_(Finland)	2	PIAB	0.103777	47.1712		Boreal_(Finland)	2	PIAB	47.1712
Boreal_(Finland)	2	PIAB	0.17229	61.5321		Boreal_(Finland)	2	PIAB	61.5321
Boreal_(Finland)	2	BEPE	13.3221	269.319		Boreal_(Finland)	2	BEPE	269.319
Boreal_(Finland)	2	PIAB	0.11353	70.9562		Boreal_(Finland)	2	PIAB	70.9562
Boreal_(Finland)	2	BEPE	12.6921	232.682		Boreal_(Finland)	2	BEPE	232.682
Boreal_(Finland)	2	PIAB	0.102118	72.9414		Boreal_(Finland)	2	PIAB	72.9414
Boreal_(Finland)	2	PIAB	0.12306	68.3667		Boreal_(Finland)	2	PIAB	68.3667
Boreal_(Finland)	2	PIAB	0.130243	59.2015		Boreal_(Finland)	2	PIAB	59.2015
Boreal_(Finland)	2	BEPE	26.1986	338.948		Boreal_(Finland)	2	BEPE	338.948
Boreal_(Finland)	2	PIAB	0.159033	79.5167		Boreal_(Finland)	2	PIAB	79.5167
Boreal_(Finland)	2	PIAB	0.135987	67.9933		Boreal_(Finland)	2	PIAB	67.9933
Boreal_(Finland)	2	PIAB	0.121647	67.5815		Boreal_(Finland)	2	PIAB	67.5815
Boreal_(Finland)	2	PIAB	0.1184	74		Boreal_(Finland)	2	PIAB	74
Boreal_(Finland)	2	PIAB	0.1049	57.9558		Boreal_(Finland)	2	PIAB	57.9558
Boreal_(Finland)	2	PIAB	0.12265	68.1389		Boreal_(Finland)	2	PIAB	68.1389
Boreal_(Finland)	2	PIAB	0.0950333	67.881		Boreal_(Finland)	2	PIAB	67.881
Boreal_(Finland)	2	PIAB	0.0808467	101.058		Boreal_(Finland)	2	PIAB	101.058
Boreal_(Finland)	2	BEPE	7.69393	206.91		Boreal_(Finland)	2	BEPE	206.91
Boreal_(Finland)	2	PIAB	0.0891867	55.7417		Boreal_(Finland)	2	PIAB	55.7417
Boreal_(Finland)	2	PIAB	0.129117	64.5583		Boreal_(Finland)	2	PIAB	64.5583
Boreal_(Finland)	2	PIAB	0.12535	69.6389		Boreal_(Finland)	2	PIAB	69.6389
Boreal_(Finland)	2	PIAB	0.119633	59.8167		Boreal_(Finland)	2	PIAB	59.8167
Boreal_(Finland)	2	PIAB	0.143167	69.8374		Boreal_(Finland)	2	PIAB	69.8374
Boreal_(Finland)	2	BEPE	16.7633	193.387		Boreal_(Finland)	2	BEPE	193.387
Boreal_(Finland)	2	PIAB	0.15545	111.036		Boreal_(Finland)	2	PIAB	111.036
Boreal_(Finland)	2	PIAB	0.101233	63.2708		Boreal_(Finland)	2	PIAB	63.2708
Boreal_(Finland)	2	BEPE	4.90693	185.843		Boreal_(Finland)	2	BEPE	185.843
Boreal_(Finland)	2	BEPE	11.0081	239.914		Boreal_(Finland)	2	BEPE	239.914
Boreal_(Finland)	2	BEPE	20.0037	268.448		Boreal_(Finland)	2	BEPE	268.448
Boreal_(Finland)	2	PIAB	0.101077	72.1976		Boreal_(Finland)	2	PIAB	72.1976
Boreal_(Finland)	2	BEPE	8.47724	223.563		Boreal_(Finland)	2	BEPE	223.563
Boreal_(Finland)	2	PIAB	0.101753	84.7944		Boreal_(Finland)	2	PIAB	84.7944
Boreal_(Finland)	2	PIAB	0.1382	69.1		Boreal_(Finland)	2	PIAB	69.1
Boreal_(Finland)	2	PIAB	0.1332	66.6		Boreal_(Finland)	2	PIAB	66.6
Boreal_(Finland)	2	PIAB	0.105157	65.7229		Boreal_(Finland)	2	PIAB	65.7229
Boreal_(Finland)	2	PIAB	0.107067	66.9167		Boreal_(Finland)	2	PIAB	66.9167
Boreal_(Finland)	2	BEPE	18.6587	370.648		Boreal_(Finland)	2	BEPE	370.648
Boreal_(Finland)	2	PIAB	0.0702467	70.2467		Boreal_(Finland)	2	PIAB	70.2467
Boreal_(Finland)	2	BEPE	12.1257	347.16		Boreal_(Finland)	2	BEPE	347.16
Boreal_(Finland)	2	BEPE	21.1276	309.51		Boreal_(Finland)	2	BEPE	309.51
Boreal_(Finland)	2	PIAB	0.0961233	68.6595		Boreal_(Finland)	2	PIAB	68.6595
Boreal_(Finland)	2	PIAB	0.0934993	77.9161		Boreal_(Finland)	2	PIAB	77.9161
Boreal_(Finland)	2	PIAB	0.07485	62.375		Boreal_(Finland)	2	PIAB	62.375
Boreal_(Finland)	2	PIAB	0.10127	84.3917		Boreal_(Finland)	2	PIAB	84.3917
Boreal_(Finland)	2	PIAB	0.105977	58.8759		Boreal_(Finland)	2	PIAB	58.8759
Boreal_(Finland)	2	PIAB	0.0916633	57.2896		Boreal_(Finland)	2	PIAB	57.2896
Boreal_(Finland)	2	BEPE	24.8061	282.455		Boreal_(Finland)	2	BEPE	282.455
Boreal_(Finland)	2	PIAB	0.100773	71.981		Boreal_(Finland)	2	PIAB	71.981
Boreal_(Finland)	2	BEPE	31.5709	301.157		Boreal_(Finland)	2	BEPE	301.157
Boreal_(Finland)	2	PIAB	0.0978	81.5		Boreal_(Finland)	2	PIAB	81.5
Boreal_(Finland)	2	BEPE	20.3938	324.653		Boreal_(Finland)	2	BEPE	324.653
Boreal_(Finland)	2	BEPE	19.6384	296.464		Boreal_(Finland)	2	BEPE	296.464
Boreal_(Finland)	2	PIAB	0.0927367	66.2405		Boreal_(Finland)	2	PIAB	66.2405
Boreal_(Finland)	2	PIAB	0.0786333	131.056		Boreal_(Finland)	2	PIAB	131.056
Boreal_(Finland)	2	BEPE	7.10703	249.432		Boreal_(Finland)	2	BEPE	249.432
Mount_beech_(Romania)	1	abal	0.413	96.7388		Mount_beech_(Romania)	1	abal	96.7388
Mount_beech_(Romania)	1	acps	78.7423	332.804		Mount_beech_(Romania)	1	acps	332.804
Mount_beech_(Romania)	1	acps	103.54	322.686		Mount_beech_(Romania)	1	acps	322.686
Mount_beech_(Romania)	1	acps	124.597	328.683		Mount_beech_(Romania)	1	acps	328.683
Mount_beech_(Romania)	1	acps	74.6097	347.488		Mount_beech_(Romania)	1	acps	347.488
Mount_beech_(Romania)	1	fasy	17.6843	362.153		Mount_beech_(Romania)	1	fasy	362.153
Mount_beech_(Romania)	1	fasy	17.2127	399.357		Mount_beech_(Romania)	1	fasy	399.357
Mount_beech_(Romania)	1	fasy	12.8723	301.901		Mount_beech_(Romania)	1	fasy	301.901
Mount_beech_(Romania)	1	fasy	15.49	384.273		Mount_beech_(Romania)	1	fasy	384.273
Mount_beech_(Romania)	1	fasy	13.1057	403.911		Mount_beech_(Romania)	1	fasy	403.911
Mount_beech_(Romania)	1	fasy	10.9753	357.262		Mount_beech_(Romania)	1	fasy	357.262
Mount_beech_(Romania)	1	fasy	13.148	352.52		Mount_beech_(Romania)	1	fasy	352.52
Mount_beech_(Romania)	1	abal	0.363667	73.8679		Mount_beech_(Romania)	1	abal	73.8679
Mount_beech_(Romania)	1	abal	0.332	81.9526		Mount_beech_(Romania)	1	abal	81.9526
Mount_beech_(Romania)	1	acps	83.852	296.429		Mount_beech_(Romania)	1	acps	296.429
Mount_beech_(Romania)	1	acps	80.6003	302.739		Mount_beech_(Romania)	1	acps	302.739
Mount_beech_(Romania)	1	acps	45.096	364.258		Mount_beech_(Romania)	1	acps	364.258
Mount_beech_(Romania)	1	acps	59.183	311.521		Mount_beech_(Romania)	1	acps	311.521
Mount_beech_(Romania)	1	acps	68.4727	339.625		Mount_beech_(Romania)	1	acps	339.625
Mount_beech_(Romania)	1	acps	61.576	365.734		Mount_beech_(Romania)	1	acps	365.734
Mount_beech_(Romania)	1	acps	58.5637	309.351		Mount_beech_(Romania)	1	acps	309.351
Mount_beech_(Romania)	1	acps	64.9337	343.526		Mount_beech_(Romania)	1	acps	343.526
Mount_beech_(Romania)	1	fasy	14.6317	333.725		Mount_beech_(Romania)	1	fasy	333.725
Mount_beech_(Romania)	1	fasy	15.4287	318.056		Mount_beech_(Romania)	1	fasy	318.056
Mount_beech_(Romania)	1	fasy	14.196	339.073		Mount_beech_(Romania)	1	fasy	339.073
Mount_beech_(Romania)	1	fasy	8.44933	352.698		Mount_beech_(Romania)	1	fasy	352.698
Mount_beech_(Romania)	1	fasy	14.121	306.233		Mount_beech_(Romania)	1	fasy	306.233
Mount_beech_(Romania)	1	fasy	17.8667	375.579		Mount_beech_(Romania)	1	fasy	375.579
Mount_beech_(Romania)	1	fasy	13.255	343.251		Mount_beech_(Romania)	1	fasy	343.251
Mount_beech_(Romania)	1	fasy	16.2957	274.21		Mount_beech_(Romania)	1	fasy	274.21
Mount_beech_(Romania)	1	fasy	12.778	315.478		Mount_beech_(Romania)	1	fasy	315.478
Mount_beech_(Romania)	1	acps	35.6413	399.278		Mount_beech_(Romania)	1	acps	399.278
Mount_beech_(Romania)	1	fasy	11.5747	404.282		Mount_beech_(Romania)	1	fasy	404.282
Mount_beech_(Romania)	1	fasy	12.7927	406.366		Mount_beech_(Romania)	1	fasy	406.366
Mount_beech_(Romania)	1	fasy	14.624	476.989		Mount_beech_(Romania)	1	fasy	476.989
Mount_beech_(Romania)	1	fasy	9.58867	411.561		Mount_beech_(Romania)	1	fasy	411.561
Mount_beech_(Romania)	1	fasy	16.6625	424.481		Mount_beech_(Romania)	1	fasy	424.481
Mount_beech_(Romania)	1	fasy	11.4261	422.884		Mount_beech_(Romania)	1	fasy	422.884
Mount_beech_(Romania)	1	fasy	14.0611	411.67		Mount_beech_(Romania)	1	fasy	411.67
Mount_beech_(Romania)	1	abal	0.3935	84.4003		Mount_beech_(Romania)	1	abal	84.4003
Mount_beech_(Romania)	1	abal	0.302433	97.4811		Mount_beech_(Romania)	1	abal	97.4811
Mount_beech_(Romania)	1	abal	0.423957	64.7708		Mount_beech_(Romania)	1	abal	64.7708
Mount_beech_(Romania)	1	fasy	17.292	403.912		Mount_beech_(Romania)	1	fasy	403.912
Mount_beech_(Romania)	1	fasy	21.6201	382.157		Mount_beech_(Romania)	1	fasy	382.157
Mount_beech_(Romania)	1	fasy	13.0362	327.101		Mount_beech_(Romania)	1	fasy	327.101
Mount_beech_(Romania)	1	fasy	16.2642	377.113		Mount_beech_(Romania)	1	fasy	377.113
Mount_beech_(Romania)	1	fasy	17.6427	406.037		Mount_beech_(Romania)	1	fasy	406.037
Mount_beech_(Romania)	1	fasy	12.7463	406.713		Mount_beech_(Romania)	1	fasy	406.713
Mount_beech_(Romania)	1	fasy	11.5783	423.329		Mount_beech_(Romania)	1	fasy	423.329
Mount_beech_(Romania)	1	fasy	18.4873	413.793		Mount_beech_(Romania)	1	fasy	413.793
Mount_beech_(Romania)	1	fasy	12.8292	312.693		Mount_beech_(Romania)	1	fasy	312.693
Mount_beech_(Romania)	1	piab	0.0835	104.375		Mount_beech_(Romania)	1	piab	104.375
Mount_beech_(Romania)	1	piab	0.105133	105.133		Mount_beech_(Romania)	1	piab	105.133
Mount_beech_(Romania)	1	piab	0.136567	97.5476		Mount_beech_(Romania)	1	piab	97.5476
Mount_beech_(Romania)	1	piab	0.1599	99.9375		Mount_beech_(Romania)	1	piab	99.9375
Mount_beech_(Romania)	1	piab	0.138	124.2		Mount_beech_(Romania)	1	piab	124.2
Mount_beech_(Romania)	1	piab	0.11621	96.8417		Mount_beech_(Romania)	1	piab	96.8417
Mount_beech_(Romania)	1	piab	0.112333	112.333		Mount_beech_(Romania)	1	piab	112.333
Mount_beech_(Romania)	1	piab	0.10486	104.86		Mount_beech_(Romania)	1	piab	104.86
Mount_beech_(Romania)	1	piab	0.146	91.25		Mount_beech_(Romania)	1	piab	91.25
Mount_beech_(Romania)	1	piab	0.118933	118.933		Mount_beech_(Romania)	1	piab	118.933
Mount_beech_(Romania)	1	fasy	10.103	367.737		Mount_beech_(Romania)	1	fasy	367.737
Mount_beech_(Romania)	1	fasy	11.5677	380.887		Mount_beech_(Romania)	1	fasy	380.887
Mount_beech_(Romania)	1	fasy	13.3404	349.093		Mount_beech_(Romania)	1	fasy	349.093
Mount_beech_(Romania)	1	fasy	15.9374	352.661		Mount_beech_(Romania)	1	fasy	352.661
Mount_beech_(Romania)	1	fasy	11.178	322.347		Mount_beech_(Romania)	1	fasy	322.347
Mount_beech_(Romania)	1	fasy	19.7299	356.786		Mount_beech_(Romania)	1	fasy	356.786
Mount_beech_(Romania)	1	fasy	14.5101	388.057		Mount_beech_(Romania)	1	fasy	388.057
Mount_beech_(Romania)	1	fasy	18.0985	367.421		Mount_beech_(Romania)	1	fasy	367.421
Mount_beech_(Romania)	1	fasy	10.7584	406.21		Mount_beech_(Romania)	1	fasy	406.21
Mount_beech_(Romania)	1	piab	0.132833	110.694		Mount_beech_(Romania)	1	piab	110.694
Mount_beech_(Romania)	1	fasy	8.9714	395.988		Mount_beech_(Romania)	1	fasy	395.988
Mount_beech_(Romania)	1	fasy	15.955	438.535		Mount_beech_(Romania)	1	fasy	438.535
Mount_beech_(Romania)	1	fasy	16.014	386.581		Mount_beech_(Romania)	1	fasy	386.581
Mount_beech_(Romania)	1	fasy	15.558	438.023		Mount_beech_(Romania)	1	fasy	438.023
Mount_beech_(Romania)	1	fasy	14.2853	433.329		Mount_beech_(Romania)	1	fasy	433.329
Mount_beech_(Romania)	1	fasy	17.1633	401.811		Mount_beech_(Romania)	1	fasy	401.811
Mount_beech_(Romania)	1	fasy	11.7469	410.721		Mount_beech_(Romania)	1	fasy	410.721
Mount_beech_(Romania)	1	abal	0.279963	109.325		Mount_beech_(Romania)	1	abal	109.325
Mount_beech_(Romania)	1	abal	0.273567	127.243		Mount_beech_(Romania)	1	abal	127.243
Mount_beech_(Romania)	1	abal	0.31727	80.9916		Mount_beech_(Romania)	1	abal	80.9916
Mount_beech_(Romania)	1	abal	0.248013	107.56		Mount_beech_(Romania)	1	abal	107.56
Mount_beech_(Romania)	1	abal	0.432877	126.774		Mount_beech_(Romania)	1	abal	126.774
Mount_beech_(Romania)	1	acps	45.2651	398.669		Mount_beech_(Romania)	1	acps	398.669
Mount_beech_(Romania)	1	acps	49.5633	383.134		Mount_beech_(Romania)	1	acps	383.134
Mount_beech_(Romania)	1	fasy	10.8665	345.862		Mount_beech_(Romania)	1	fasy	345.862
Mount_beech_(Romania)	1	fasy	11.8616	370.83		Mount_beech_(Romania)	1	fasy	370.83
Mount_beech_(Romania)	1	fasy	11.4619	382.414		Mount_beech_(Romania)	1	fasy	382.414
Mount_beech_(Romania)	1	fasy	11.9944	377.796		Mount_beech_(Romania)	1	fasy	377.796
Mount_beech_(Romania)	1	fasy	15.9074	442.997		Mount_beech_(Romania)	1	fasy	442.997
Mount_beech_(Romania)	1	fasy	12.8829	373.705		Mount_beech_(Romania)	1	fasy	373.705
Mount_beech_(Romania)	1	piab	0.130353	97.765		Mount_beech_(Romania)	1	piab	97.765
Mount_beech_(Romania)	1	piab	0.145017	103.583		Mount_beech_(Romania)	1	piab	103.583
Mount_beech_(Romania)	1	piab	0.0904667	99.5133		Mount_beech_(Romania)	1	piab	99.5133
Mount_beech_(Romania)	2	fasy	9.15433	392.324		Mount_beech_(Romania)	2	fasy	392.324
Mount_beech_(Romania)	2	fasy	9.813	430.963		Mount_beech_(Romania)	2	fasy	430.963
Mount_beech_(Romania)	2	fasy	7.899	409.572		Mount_beech_(Romania)	2	fasy	409.572
Mount_beech_(Romania)	2	fasy	11.1887	432.553		Mount_beech_(Romania)	2	fasy	432.553
Mount_beech_(Romania)	2	fasy	10.326	378.517		Mount_beech_(Romania)	2	fasy	378.517
Mount_beech_(Romania)	2	fasy	11.9937	391.698		Mount_beech_(Romania)	2	fasy	391.698
Mount_beech_(Romania)	2	fasy	8.94467	384.963		Mount_beech_(Romania)	2	fasy	384.963
Mount_beech_(Romania)	2	fasy	9.79833	361.081		Mount_beech_(Romania)	2	fasy	361.081
Mount_beech_(Romania)	2	fasy	11.2797	371.523		Mount_beech_(Romania)	2	fasy	371.523
Mount_beech_(Romania)	2	fasy	11.4613	399.765		Mount_beech_(Romania)	2	fasy	399.765
Mount_beech_(Romania)	2	abal	0.460667	100.636		Mount_beech_(Romania)	2	abal	100.636
Mount_beech_(Romania)	2	abal	0.283333	91.028		Mount_beech_(Romania)	2	abal	91.028
Mount_beech_(Romania)	2	abal	0.338333	102.3		Mount_beech_(Romania)	2	abal	102.3
Mount_beech_(Romania)	2	fasy	17.0013	425.053		Mount_beech_(Romania)	2	fasy	425.053
Mount_beech_(Romania)	2	fasy	20.3977	406.397		Mount_beech_(Romania)	2	fasy	406.397
Mount_beech_(Romania)	2	fasy	11.9073	414.662		Mount_beech_(Romania)	2	fasy	414.662
Mount_beech_(Romania)	2	fasy	7.93333	459.108		Mount_beech_(Romania)	2	fasy	459.108
Mount_beech_(Romania)	2	fasy	17.2367	388.224		Mount_beech_(Romania)	2	fasy	388.224
Mount_beech_(Romania)	2	fasy	17.009	494.207		Mount_beech_(Romania)	2	fasy	494.207
Mount_beech_(Romania)	2	fasy	10.5793	353.543		Mount_beech_(Romania)	2	fasy	353.543
Mount_beech_(Romania)	2	fasy	16.8563	339.784		Mount_beech_(Romania)	2	fasy	339.784
Mount_beech_(Romania)	2	fasy	16.928	361.225		Mount_beech_(Romania)	2	fasy	361.225
Mount_beech_(Romania)	2	piab	0.125667	104.722		Mount_beech_(Romania)	2	piab	104.722
Mount_beech_(Romania)	2	piab	0.163667	163.667		Mount_beech_(Romania)	2	piab	163.667
Mount_beech_(Romania)	2	piab	0.113333	127.5		Mount_beech_(Romania)	2	piab	127.5
Mount_beech_(Romania)	2	piab	0.099	82.5		Mount_beech_(Romania)	2	piab	82.5
Mount_beech_(Romania)	2	fasy	16.9823	386.471		Mount_beech_(Romania)	2	fasy	386.471
Mount_beech_(Romania)	2	fasy	14.2957	398.47		Mount_beech_(Romania)	2	fasy	398.47
Mount_beech_(Romania)	2	fasy	12.945	394.509		Mount_beech_(Romania)	2	fasy	394.509
Mount_beech_(Romania)	2	fasy	13.5473	383.838		Mount_beech_(Romania)	2	fasy	383.838
Mount_beech_(Romania)	2	fasy	13.4938	427.055		Mount_beech_(Romania)	2	fasy	427.055
Mount_beech_(Romania)	2	fasy	16.0503	413.641		Mount_beech_(Romania)	2	fasy	413.641
Mount_beech_(Romania)	2	fasy	11.4595	519.212		Mount_beech_(Romania)	2	fasy	519.212
Mount_beech_(Romania)	2	fasy	14.6597	487		Mount_beech_(Romania)	2	fasy	487
Mount_beech_(Romania)	2	fasy	12.1706	405.742		Mount_beech_(Romania)	2	fasy	405.742
Mount_beech_(Romania)	2	fasy	12.2825	467.425		Mount_beech_(Romania)	2	fasy	467.425
Mount_beech_(Romania)	2	fasy	15.4268	447.184		Mount_beech_(Romania)	2	fasy	447.184
Mount_beech_(Romania)	2	fasy	20.4078	438.205		Mount_beech_(Romania)	2	fasy	438.205
Mount_beech_(Romania)	2	fasy	10.7662	425.675		Mount_beech_(Romania)	2	fasy	425.675
Mount_beech_(Romania)	2	piab	0.08423	105.288		Mount_beech_(Romania)	2	piab	105.288
Mount_beech_(Romania)	2	fasy	12.466	382.864		Mount_beech_(Romania)	2	fasy	382.864
Mount_beech_(Romania)	2	fasy	15.3154	369.442		Mount_beech_(Romania)	2	fasy	369.442
Mount_beech_(Romania)	2	fasy	16.333	389.033		Mount_beech_(Romania)	2	fasy	389.033
Mount_beech_(Romania)	2	fasy	19.8423	377.269		Mount_beech_(Romania)	2	fasy	377.269
Mount_beech_(Romania)	2	fasy	15.1717	324.584		Mount_beech_(Romania)	2	fasy	324.584
Mount_beech_(Romania)	2	fasy	15.2253	399.582		Mount_beech_(Romania)	2	fasy	399.582
Mount_beech_(Romania)	2	fasy	17.445	437.709		Mount_beech_(Romania)	2	fasy	437.709
Mount_beech_(Romania)	2	fasy	16.8572	406.571		Mount_beech_(Romania)	2	fasy	406.571
Mount_beech_(Romania)	2	piab	0.109867	109.867		Mount_beech_(Romania)	2	piab	109.867
Mount_beech_(Romania)	2	piab	0.185233	84.197		Mount_beech_(Romania)	2	piab	84.197
Mount_beech_(Romania)	2	piab	0.2232	101.455		Mount_beech_(Romania)	2	piab	101.455
Mount_beech_(Romania)	2	piab	0.154733	85.963		Mount_beech_(Romania)	2	piab	85.963
Mount_beech_(Romania)	2	piab	0.174233	108.896		Mount_beech_(Romania)	2	piab	108.896
Mount_beech_(Romania)	2	abal	0.251233	82.0112		Mount_beech_(Romania)	2	abal	82.0112
Mount_beech_(Romania)	2	fasy	8.75963	313.069		Mount_beech_(Romania)	2	fasy	313.069
Mount_beech_(Romania)	2	fasy	8.07467	327.531		Mount_beech_(Romania)	2	fasy	327.531
Mount_beech_(Romania)	2	fasy	7.4133	327.009		Mount_beech_(Romania)	2	fasy	327.009
Mount_beech_(Romania)	2	fasy	8.59357	359.613		Mount_beech_(Romania)	2	fasy	359.613
Mount_beech_(Romania)	2	fasy	12.9961	391.321		Mount_beech_(Romania)	2	fasy	391.321
Mount_beech_(Romania)	2	fasy	17.565	365.48		Mount_beech_(Romania)	2	fasy	365.48
Mount_beech_(Romania)	2	fasy	16.0805	402.139		Mount_beech_(Romania)	2	fasy	402.139
Mount_beech_(Romania)	2	fasy	10.1983	416.989		Mount_beech_(Romania)	2	fasy	416.989
Mount_beech_(Romania)	2	fasy	12.6166	389.259		Mount_beech_(Romania)	2	fasy	389.259
Mount_beech_(Romania)	2	abal	0.4304	89.3359		Mount_beech_(Romania)	2	abal	89.3359
Mount_beech_(Romania)	2	abal	0.393933	83.4327		Mount_beech_(Romania)	2	abal	83.4327
Mount_beech_(Romania)	2	abal	0.5675	77.3552		Mount_beech_(Romania)	2	abal	77.3552
Mount_beech_(Romania)	2	abal	0.502433	86.9458		Mount_beech_(Romania)	2	abal	86.9458
Mount_beech_(Romania)	2	abal	0.4939	73.9513		Mount_beech_(Romania)	2	abal	73.9513
Mount_beech_(Romania)	2	abal	0.519767	77.0933		Mount_beech_(Romania)	2	abal	77.0933
Mount_beech_(Romania)	2	abal	0.528133	78.3255		Mount_beech_(Romania)	2	abal	78.3255
Mount_beech_(Romania)	2	abal	0.4077	98.7181		Mount_beech_(Romania)	2	abal	98.7181
Mount_beech_(Romania)	2	fasy	20.1327	390.547		Mount_beech_(Romania)	2	fasy	390.547
Mount_beech_(Romania)	2	fasy	18.501	354.991		Mount_beech_(Romania)	2	fasy	354.991
Mount_beech_(Romania)	2	fasy	31.3461	415.639		Mount_beech_(Romania)	2	fasy	415.639
Mount_beech_(Romania)	2	fasy	14.9276	277.238		Mount_beech_(Romania)	2	fasy	277.238
Mount_beech_(Romania)	2	fasy	16.557	315.346		Mount_beech_(Romania)	2	fasy	315.346
Mount_beech_(Romania)	2	fasy	22.3261	408.712		Mount_beech_(Romania)	2	fasy	408.712
Mount_beech_(Romania)	2	fasy	20.0193	423.25		Mount_beech_(Romania)	2	fasy	423.25
Mount_beech_(Romania)	2	fasy	19.9488	372.775		Mount_beech_(Romania)	2	fasy	372.775
Mount_beech_(Romania)	2	piab	0.144633	90.3958		Mount_beech_(Romania)	2	piab	90.3958
Mount_beech_(Romania)	2	piab	0.109767	100.619		Mount_beech_(Romania)	2	piab	100.619
Mount_beech_(Romania)	2	fasy	20.1631	426.391		Mount_beech_(Romania)	2	fasy	426.391
Mount_beech_(Romania)	2	fasy	21.691	384.308		Mount_beech_(Romania)	2	fasy	384.308
Mount_beech_(Romania)	2	fasy	12.5153	398.691		Mount_beech_(Romania)	2	fasy	398.691
Mount_beech_(Romania)	2	piab	0.109667	109.667		Mount_beech_(Romania)	2	piab	109.667
Mount_beech_(Romania)	2	piab	0.0860133	107.517		Mount_beech_(Romania)	2	piab	107.517
Mount_beech_(Romania)	2	piab	0.11738	65.2111		Mount_beech_(Romania)	2	piab	65.2111
Mount_beech_(Romania)	2	piab	0.144567	120.472		Mount_beech_(Romania)	2	piab	120.472
Mount_beech_(Romania)	3	fasy	14.6607	423.107		Mount_beech_(Romania)	3	fasy	423.107
Mount_beech_(Romania)	3	abal	0.468467	99.6358		Mount_beech_(Romania)	3	abal	99.6358
Mount_beech_(Romania)	3	fasy	17.0085	290.868		Mount_beech_(Romania)	3	fasy	290.868
Mount_beech_(Romania)	3	fasy	10.8969	297.236		Mount_beech_(Romania)	3	fasy	297.236
Mount_beech_(Romania)	3	fasy	18.3867	302.087		Mount_beech_(Romania)	3	fasy	302.087
Mount_beech_(Romania)	3	fasy	18.8356	340.754		Mount_beech_(Romania)	3	fasy	340.754
Mount_beech_(Romania)	3	fasy	15.7218	311.081		Mount_beech_(Romania)	3	fasy	311.081
Mount_beech_(Romania)	3	piab	0.1314	82.125		Mount_beech_(Romania)	3	piab	82.125
Mount_beech_(Romania)	3	piab	0.262817	82.1302		Mount_beech_(Romania)	3	piab	82.1302
Mount_beech_(Romania)	3	fasy	9.19413	373.806		Mount_beech_(Romania)	3	fasy	373.806
Mount_beech_(Romania)	3	fasy	6.89403	321.132		Mount_beech_(Romania)	3	fasy	321.132
Mount_beech_(Romania)	3	fasy	13.511	391.762		Mount_beech_(Romania)	3	fasy	391.762
Mount_beech_(Romania)	3	fasy	11.7278	413.081		Mount_beech_(Romania)	3	fasy	413.081
Mount_beech_(Romania)	3	fasy	12.296	389.768		Mount_beech_(Romania)	3	fasy	389.768
Mount_beech_(Romania)	3	fasy	24.2483	395.006		Mount_beech_(Romania)	3	fasy	395.006
Mount_beech_(Romania)	3	fasy	13.4075	412.622		Mount_beech_(Romania)	3	fasy	412.622
Mount_beech_(Romania)	3	fasy	16.5297	392.149		Mount_beech_(Romania)	3	fasy	392.149
Mount_beech_(Romania)	3	fasy	18.9905	425.512		Mount_beech_(Romania)	3	fasy	425.512
Mount_beech_(Romania)	3	piab	0.183867	102.148		Mount_beech_(Romania)	3	piab	102.148
Mount_beech_(Romania)	3	abal	0.355167	73.4412		Mount_beech_(Romania)	3	abal	73.4412
Mount_beech_(Romania)	3	abal	0.4929	111.231		Mount_beech_(Romania)	3	abal	111.231
Mount_beech_(Romania)	3	abal	0.771667	100.708		Mount_beech_(Romania)	3	abal	100.708
Mount_beech_(Romania)	3	abal	0.4899	80.0098		Mount_beech_(Romania)	3	abal	80.0098
Mount_beech_(Romania)	3	fasy	15.509	401.452		Mount_beech_(Romania)	3	fasy	401.452
Mount_beech_(Romania)	3	fasy	11.8763	393.487		Mount_beech_(Romania)	3	fasy	393.487
Mount_beech_(Romania)	3	fasy	17.6756	475.22		Mount_beech_(Romania)	3	fasy	475.22
Mount_beech_(Romania)	3	fasy	14.2478	424.246		Mount_beech_(Romania)	3	fasy	424.246
Mount_beech_(Romania)	3	fasy	18.8403	387.008		Mount_beech_(Romania)	3	fasy	387.008
Mount_beech_(Romania)	3	fasy	9.3986	403.572		Mount_beech_(Romania)	3	fasy	403.572
Mount_beech_(Romania)	3	fasy	14.7327	344.785		Mount_beech_(Romania)	3	fasy	344.785
Mount_beech_(Romania)	3	fasy	18.0507	400.544		Mount_beech_(Romania)	3	fasy	400.544
Mount_beech_(Romania)	3	fasy	18.8366	436.347		Mount_beech_(Romania)	3	fasy	436.347
Mount_beech_(Romania)	3	piab	0.142467	101.762		Mount_beech_(Romania)	3	piab	101.762
Mount_beech_(Romania)	3	piab	0.134933	112.444		Mount_beech_(Romania)	3	piab	112.444
Mount_beech_(Romania)	3	piab	0.134933	96.381		Mount_beech_(Romania)	3	piab	96.381
Mount_beech_(Romania)	3	piab	0.127067	127.067		Mount_beech_(Romania)	3	piab	127.067
Mount_beech_(Romania)	3	piab	0.194443	89.1199		Mount_beech_(Romania)	3	piab	89.1199
Mount_beech_(Romania)	3	abal	0.280467	81.4564		Mount_beech_(Romania)	3	abal	81.4564
Mount_beech_(Romania)	3	abal	0.341633	81.5758		Mount_beech_(Romania)	3	abal	81.5758
Mount_beech_(Romania)	3	abal	0.2592	91.9053		Mount_beech_(Romania)	3	abal	91.9053
Mount_beech_(Romania)	3	fasy	12.5498	409.665		Mount_beech_(Romania)	3	fasy	409.665
Mount_beech_(Romania)	3	fasy	12.8595	458.88		Mount_beech_(Romania)	3	fasy	458.88
Mount_beech_(Romania)	3	fasy	15.8204	481.734		Mount_beech_(Romania)	3	fasy	481.734
Mount_beech_(Romania)	3	fasy	9.5817	399.681		Mount_beech_(Romania)	3	fasy	399.681
Mount_beech_(Romania)	3	fasy	13.0168	361.936		Mount_beech_(Romania)	3	fasy	361.936
Mount_beech_(Romania)	3	fasy	14.1109	509.555		Mount_beech_(Romania)	3	fasy	509.555
Mount_beech_(Romania)	3	fasy	11.3882	449.65		Mount_beech_(Romania)	3	fasy	449.65
Mount_beech_(Romania)	3	fasy	14.9329	457.349		Mount_beech_(Romania)	3	fasy	457.349
Mount_beech_(Romania)	3	abal	0.5457	83.1964		Mount_beech_(Romania)	3	abal	83.1964
Mount_beech_(Romania)	3	abal	0.423733	88.6275		Mount_beech_(Romania)	3	abal	88.6275
Mount_beech_(Romania)	3	abal	0.5085	99.1594		Mount_beech_(Romania)	3	abal	99.1594
Mount_beech_(Romania)	3	fasy	13.7837	369.25		Mount_beech_(Romania)	3	fasy	369.25
Mount_beech_(Romania)	3	fasy	14.939	388.749		Mount_beech_(Romania)	3	fasy	388.749
Mount_beech_(Romania)	3	fasy	14.4945	396.166		Mount_beech_(Romania)	3	fasy	396.166
Mount_beech_(Romania)	3	fasy	11.0213	394.153		Mount_beech_(Romania)	3	fasy	394.153
Mount_beech_(Romania)	3	fasy	19.7756	358.044		Mount_beech_(Romania)	3	fasy	358.044
Mount_beech_(Romania)	3	piab	0.1401	100.071		Mount_beech_(Romania)	3	piab	100.071
Mount_beech_(Romania)	3	piab	0.132713	94.7952		Mount_beech_(Romania)	3	piab	94.7952
Mount_beech_(Romania)	4	fasy	19.4777	406.851		Mount_beech_(Romania)	4	fasy	406.851
Mount_beech_(Romania)	4	fasy	14.3627	430.318		Mount_beech_(Romania)	4	fasy	430.318
Mount_beech_(Romania)	4	fasy	13.206	399.395		Mount_beech_(Romania)	4	fasy	399.395
Mount_beech_(Romania)	4	fasy	13.2033	383.934		Mount_beech_(Romania)	4	fasy	383.934
Mount_beech_(Romania)	4	fasy	19.241	406.564		Mount_beech_(Romania)	4	fasy	406.564
Mount_beech_(Romania)	4	fasy	15.882	397.298		Mount_beech_(Romania)	4	fasy	397.298
Mount_beech_(Romania)	4	fasy	17.7263	438.657		Mount_beech_(Romania)	4	fasy	438.657
Mount_beech_(Romania)	4	fasy	14.507	410.376		Mount_beech_(Romania)	4	fasy	410.376
Mount_beech_(Romania)	4	fasy	11.9103	425.622		Mount_beech_(Romania)	4	fasy	425.622
Mount_beech_(Romania)	4	fasy	15.6481	385.149		Mount_beech_(Romania)	4	fasy	385.149
Mount_beech_(Romania)	4	fasy	14.3108	429.067		Mount_beech_(Romania)	4	fasy	429.067
Mount_beech_(Romania)	4	fasy	13.7157	428.835		Mount_beech_(Romania)	4	fasy	428.835
Mount_beech_(Romania)	4	fasy	17.771	399.407		Mount_beech_(Romania)	4	fasy	399.407
Mount_beech_(Romania)	4	fasy	17.9609	415.053		Mount_beech_(Romania)	4	fasy	415.053
Mount_beech_(Romania)	4	fasy	18.4565	403.94		Mount_beech_(Romania)	4	fasy	403.94
Mount_beech_(Romania)	4	fasy	17.3636	448.698		Mount_beech_(Romania)	4	fasy	448.698
Mount_beech_(Romania)	4	fasy	18.3528	468.014		Mount_beech_(Romania)	4	fasy	468.014
Mount_beech_(Romania)	4	fasy	15.518	431.521		Mount_beech_(Romania)	4	fasy	431.521
Mount_beech_(Romania)	4	fasy	14.7348	461.948		Mount_beech_(Romania)	4	fasy	461.948
Mount_beech_(Romania)	4	fasy	14.112	443.185		Mount_beech_(Romania)	4	fasy	443.185
Medit_mixed_(Spain)	1	P.nigra	1.35333	29.6281		Medit_mixed_(Spain)	1	P.nigra	29.6281
Medit_mixed_(Spain)	1	P.nigra	0.5	44.381		Medit_mixed_(Spain)	1	P.nigra	44.381
Medit_mixed_(Spain)	1	P.nigra	1.03333	44.0476		Medit_mixed_(Spain)	1	P.nigra	44.0476
Medit_mixed_(Spain)	1	P.nigra	0.64	40		Medit_mixed_(Spain)	1	P.nigra	40
Medit_mixed_(Spain)	1	P.nigra	0.926667	59.3333		Medit_mixed_(Spain)	1	P.nigra	59.3333
Medit_mixed_(Spain)	1	P.nigra	0.756667	49.4345		Medit_mixed_(Spain)	1	P.nigra	49.4345
Medit_mixed_(Spain)	1	P.nigra	0.82	50.5556		Medit_mixed_(Spain)	1	P.nigra	50.5556
Medit_mixed_(Spain)	1	P.nigra	0.863333	39.4744		Medit_mixed_(Spain)	1	P.nigra	39.4744
Medit_mixed_(Spain)	1	P.nigra	0.85	51.088		Medit_mixed_(Spain)	1	P.nigra	51.088
Medit_mixed_(Spain)	1	P.nigra	0.863333	47.037		Medit_mixed_(Spain)	1	P.nigra	47.037
Medit_mixed_(Spain)	1	P.nigra	0.926667	42.3308		Medit_mixed_(Spain)	1	P.nigra	42.3308
Medit_mixed_(Spain)	1	P.nigra	0.756667	33.4596		Medit_mixed_(Spain)	1	P.nigra	33.4596
Medit_mixed_(Spain)	1	P.nigra	0.926667	46.3333		Medit_mixed_(Spain)	1	P.nigra	46.3333
Medit_mixed_(Spain)	1	P.nigra	0.75	48.3194		Medit_mixed_(Spain)	1	P.nigra	48.3194
Medit_mixed_(Spain)	1	P.nigra	0.816667	37.1212		Medit_mixed_(Spain)	1	P.nigra	37.1212
Medit_mixed_(Spain)	1	P.nigra	0.82	35.0142		Medit_mixed_(Spain)	1	P.nigra	35.0142
Medit_mixed_(Spain)	1	P.nigra	0.563333	48.6111		Medit_mixed_(Spain)	1	P.nigra	48.6111
Medit_mixed_(Spain)	1	P.nigra	0.713333	31.6799		Medit_mixed_(Spain)	1	P.nigra	31.6799
Medit_mixed_(Spain)	1	P.nigra	0.74	36.625		Medit_mixed_(Spain)	1	P.nigra	36.625
Medit_mixed_(Spain)	1	P.nigra	0.646667	37.338		Medit_mixed_(Spain)	1	P.nigra	37.338
Medit_mixed_(Spain)	1	P.nigra	0.653333	35.1296		Medit_mixed_(Spain)	1	P.nigra	35.1296
Medit_mixed_(Spain)	1	P.nigra	0.68	32.8283		Medit_mixed_(Spain)	1	P.nigra	32.8283
Medit_mixed_(Spain)	1	P.nigra	0.686667	34.537		Medit_mixed_(Spain)	1	P.nigra	34.537
Medit_mixed_(Spain)	1	P.nigra	0.773333	45.6764		Medit_mixed_(Spain)	1	P.nigra	45.6764
Medit_mixed_(Spain)	1	P.nigra	0.726667	37.6481		Medit_mixed_(Spain)	1	P.nigra	37.6481
Medit_mixed_(Spain)	1	P.nigra	0.696667	37.3704		Medit_mixed_(Spain)	1	P.nigra	37.3704
Medit_mixed_(Spain)	1	P.nigra	0.616667	47.0139		Medit_mixed_(Spain)	1	P.nigra	47.0139
Medit_mixed_(Spain)	1	P.nigra	0.853333	38.819		Medit_mixed_(Spain)	1	P.nigra	38.819
Medit_mixed_(Spain)	1	P.nigra	0.953333	44.8182		Medit_mixed_(Spain)	1	P.nigra	44.8182
Medit_mixed_(Spain)	1	P.nigra	0.84	32.0389		Medit_mixed_(Spain)	1	P.nigra	32.0389
Medit_mixed_(Spain)	1	P.nigra	0.743333	39.9583		Medit_mixed_(Spain)	1	P.nigra	39.9583
Medit_mixed_(Spain)	1	P.nigra	0.62	34.4886		Medit_mixed_(Spain)	1	P.nigra	34.4886
Medit_mixed_(Spain)	1	P.nigra	0.94	40.4167		Medit_mixed_(Spain)	1	P.nigra	40.4167
Medit_mixed_(Spain)	1	P.nigra	0.806667	36.7949		Medit_mixed_(Spain)	1	P.nigra	36.7949
Medit_mixed_(Spain)	1	P.nigra	0.84	47.0417		Medit_mixed_(Spain)	1	P.nigra	47.0417
Medit_mixed_(Spain)	1	P.nigra	0.676667	44.7354		Medit_mixed_(Spain)	1	P.nigra	44.7354
Medit_mixed_(Spain)	1	P.nigra	0.876667	48.8889		Medit_mixed_(Spain)	1	P.nigra	48.8889
Medit_mixed_(Spain)	1	P.nigra	0.753333	40.4259		Medit_mixed_(Spain)	1	P.nigra	40.4259
Medit_mixed_(Spain)	1	P.nigra	0.636667	38.0556		Medit_mixed_(Spain)	1	P.nigra	38.0556
Medit_mixed_(Spain)	1	P.nigra	0.886667	40.4823		Medit_mixed_(Spain)	1	P.nigra	40.4823
Medit_mixed_(Spain)	1	P.nigra	0.756667	42.3704		Medit_mixed_(Spain)	1	P.nigra	42.3704
Medit_mixed_(Spain)	1	P.nigra	0.936667	40.2115		Medit_mixed_(Spain)	1	P.nigra	40.2115
Medit_mixed_(Spain)	1	P.nigra	0.663333	37.213		Medit_mixed_(Spain)	1	P.nigra	37.213
Medit_mixed_(Spain)	1	P.nigra	0.436667	44		Medit_mixed_(Spain)	1	P.nigra	44
Medit_mixed_(Spain)	1	P.nigra	0.88	39.7191		Medit_mixed_(Spain)	1	P.nigra	39.7191
Medit_mixed_(Spain)	1	P.nigra	0.876667	38.0536		Medit_mixed_(Spain)	1	P.nigra	38.0536
Medit_mixed_(Spain)	1	P.nigra	0.83	35.1958		Medit_mixed_(Spain)	1	P.nigra	35.1958
Medit_mixed_(Spain)	1	P.nigra	0.956667	33.9136		Medit_mixed_(Spain)	1	P.nigra	33.9136
Medit_mixed_(Spain)	1	P.nigra	0.773333	34.4736		Medit_mixed_(Spain)	1	P.nigra	34.4736
Medit_mixed_(Spain)	1	P.nigra	0.953333	39.6856		Medit_mixed_(Spain)	1	P.nigra	39.6856
Medit_mixed_(Spain)	1	P.nigra	0.826667	42.9856		Medit_mixed_(Spain)	1	P.nigra	42.9856
Medit_mixed_(Spain)	1	P.nigra	0.9	34.6154		Medit_mixed_(Spain)	1	P.nigra	34.6154
Medit_mixed_(Spain)	1	P.nigra	0.783333	42.5694		Medit_mixed_(Spain)	1	P.nigra	42.5694
Medit_mixed_(Spain)	1	P.nigra	0.713333	36.0219		Medit_mixed_(Spain)	1	P.nigra	36.0219
Medit_mixed_(Spain)	1	P.nigra	1.02333	43.9394		Medit_mixed_(Spain)	1	P.nigra	43.9394
Medit_mixed_(Spain)	1	P.nigra	0.773333	42.119		Medit_mixed_(Spain)	1	P.nigra	42.119
Medit_mixed_(Spain)	1	P.nigra	0.673333	38.9167		Medit_mixed_(Spain)	1	P.nigra	38.9167
Medit_mixed_(Spain)	2	P.nigra	0.873333	45.4978		Medit_mixed_(Spain)	2	P.nigra	45.4978
Medit_mixed_(Spain)	2	P.nigra	0.803333	38.0952		Medit_mixed_(Spain)	2	P.nigra	38.0952
Medit_mixed_(Spain)	2	P.nigra	0.816667	56.0438		Medit_mixed_(Spain)	2	P.nigra	56.0438
Medit_mixed_(Spain)	2	P.nigra	0.656667	39.2857		Medit_mixed_(Spain)	2	P.nigra	39.2857
Medit_mixed_(Spain)	2	P.nigra	0.94	45.5909		Medit_mixed_(Spain)	2	P.nigra	45.5909
Medit_mixed_(Spain)	2	P.nigra	1.16	48.3897		Medit_mixed_(Spain)	2	P.nigra	48.3897
Medit_mixed_(Spain)	2	P.sylvestris	0.466667	56.7057		Medit_mixed_(Spain)	2	P.sylvestris	56.7057
Medit_mixed_(Spain)	2	P.sylvestris	0.536667	37.5864		Medit_mixed_(Spain)	2	P.sylvestris	37.5864
Medit_mixed_(Spain)	2	P.sylvestris	0.47	40.111		Medit_mixed_(Spain)	2	P.sylvestris	40.111
Medit_mixed_(Spain)	2	P.sylvestris	0.283333	38.4457		Medit_mixed_(Spain)	2	P.sylvestris	38.4457
Medit_mixed_(Spain)	2	P.sylvestris	0.403333	43.0183		Medit_mixed_(Spain)	2	P.sylvestris	43.0183
Medit_mixed_(Spain)	2	P.sylvestris	0.306667	35.926		Medit_mixed_(Spain)	2	P.sylvestris	35.926
Medit_mixed_(Spain)	2	P.sylvestris	0.38	45.4244		Medit_mixed_(Spain)	2	P.sylvestris	45.4244
Medit_mixed_(Spain)	2	P.nigra	0.746667	37.6326		Medit_mixed_(Spain)	2	P.nigra	37.6326
Medit_mixed_(Spain)	2	Q.faginea	3.92667	83.3404		Medit_mixed_(Spain)	2	Q.faginea	83.3404
Medit_mixed_(Spain)	2	Q.faginea	3.54	101.536		Medit_mixed_(Spain)	2	Q.faginea	101.536
Medit_mixed_(Spain)	2	Q.faginea	2.45667	116.444		Medit_mixed_(Spain)	2	Q.faginea	116.444
Medit_mixed_(Spain)	2	Q.ilex	5.12333	64.0314		Medit_mixed_(Spain)	2	Q.ilex	64.0314
Medit_mixed_(Spain)	2	P.nigra	0.55	45.8333		Medit_mixed_(Spain)	2	P.nigra	45.8333
Medit_mixed_(Spain)	2	P.nigra	0.956667	36.7949		Medit_mixed_(Spain)	2	P.nigra	36.7949
Medit_mixed_(Spain)	2	P.nigra	0.756667	43.588		Medit_mixed_(Spain)	2	P.nigra	43.588
Medit_mixed_(Spain)	2	P.nigra	0.696667	45.5952		Medit_mixed_(Spain)	2	P.nigra	45.5952
Medit_mixed_(Spain)	2	P.nigra	0.976667	34.3681		Medit_mixed_(Spain)	2	P.nigra	34.3681
Medit_mixed_(Spain)	2	P.nigra	0.866667	43.8426		Medit_mixed_(Spain)	2	P.nigra	43.8426
Medit_mixed_(Spain)	2	P.nigra	0.543333	36.0556		Medit_mixed_(Spain)	2	P.nigra	36.0556
Medit_mixed_(Spain)	2	P.nigra	0.906667	40.1641		Medit_mixed_(Spain)	2	P.nigra	40.1641
Medit_mixed_(Spain)	2	P.nigra	0.623333	44.5238		Medit_mixed_(Spain)	2	P.nigra	44.5238
Medit_mixed_(Spain)	2	P.nigra	0.64	35.5324		Medit_mixed_(Spain)	2	P.nigra	35.5324
Medit_mixed_(Spain)	2	P.sylvestris	0.453333	46.3889		Medit_mixed_(Spain)	2	P.sylvestris	46.3889
Medit_mixed_(Spain)	2	P.sylvestris	0.39	42.0833		Medit_mixed_(Spain)	2	P.sylvestris	42.0833
Medit_mixed_(Spain)	2	P.nigra	0.76	30.8387		Medit_mixed_(Spain)	2	P.nigra	30.8387
Medit_mixed_(Spain)	2	P.nigra	0.886667	37.1853		Medit_mixed_(Spain)	2	P.nigra	37.1853
Medit_mixed_(Spain)	2	P.nigra	0.683333	40.0529		Medit_mixed_(Spain)	2	P.nigra	40.0529
Medit_mixed_(Spain)	2	P.nigra	0.806667	32.9672		Medit_mixed_(Spain)	2	P.nigra	32.9672
Medit_mixed_(Spain)	2	P.nigra	0.96	39.1142		Medit_mixed_(Spain)	2	P.nigra	39.1142
Medit_mixed_(Spain)	2	P.sylvestris	0.21	52.1368		Medit_mixed_(Spain)	2	P.sylvestris	52.1368
Medit_mixed_(Spain)	2	P.sylvestris	0.306667	44.1729		Medit_mixed_(Spain)	2	P.sylvestris	44.1729
Medit_mixed_(Spain)	2	P.sylvestris	0.63	31.9675		Medit_mixed_(Spain)	2	P.sylvestris	31.9675
Medit_mixed_(Spain)	2	P.sylvestris	0.403333	30.2899		Medit_mixed_(Spain)	2	P.sylvestris	30.2899
Medit_mixed_(Spain)	2	P.sylvestris	0.366667	35.4996		Medit_mixed_(Spain)	2	P.sylvestris	35.4996
Medit_mixed_(Spain)	2	P.sylvestris	0.29	37.4633		Medit_mixed_(Spain)	2	P.sylvestris	37.4633
Medit_mixed_(Spain)	2	P.nigra	1.07333	34.9851		Medit_mixed_(Spain)	2	P.nigra	34.9851
Medit_mixed_(Spain)	2	P.nigra	1.00667	34.0093		Medit_mixed_(Spain)	2	P.nigra	34.0093
Medit_mixed_(Spain)	2	P.nigra	0.9	37.4231		Medit_mixed_(Spain)	2	P.nigra	37.4231
Medit_mixed_(Spain)	2	P.nigra	0.576667	46.9213		Medit_mixed_(Spain)	2	P.nigra	46.9213
Medit_mixed_(Spain)	2	Q.faginea	2.745	114.913		Medit_mixed_(Spain)	2	Q.faginea	114.913
Medit_mixed_(Spain)	2	P.nigra	0.666667	47.2718		Medit_mixed_(Spain)	2	P.nigra	47.2718
Medit_mixed_(Spain)	2	P.nigra	0.606667	38.1085		Medit_mixed_(Spain)	2	P.nigra	38.1085
Medit_mixed_(Spain)	2	P.nigra	0.78	40.9028		Medit_mixed_(Spain)	2	P.nigra	40.9028
Medit_mixed_(Spain)	2	P.nigra	0.856667	42.7381		Medit_mixed_(Spain)	2	P.nigra	42.7381
Medit_mixed_(Spain)	2	P.nigra	0.676667	35.1684		Medit_mixed_(Spain)	2	P.nigra	35.1684
Medit_mixed_(Spain)	2	P.nigra	0.793333	47.7315		Medit_mixed_(Spain)	2	P.nigra	47.7315
Medit_mixed_(Spain)	2	P.nigra	0.91	35.8317		Medit_mixed_(Spain)	2	P.nigra	35.8317
Medit_mixed_(Spain)	2	Q.faginea	3.43	95.2778		Medit_mixed_(Spain)	2	Q.faginea	95.2778
Medit_mixed_(Spain)	2	Q.faginea	2.85667	90.6415		Medit_mixed_(Spain)	2	Q.faginea	90.6415
Medit_mixed_(Spain)	2	Q.faginea	4.28667	97.8634		Medit_mixed_(Spain)	2	Q.faginea	97.8634
Medit_mixed_(Spain)	2	Q.ilex	3.03667	53.2336		Medit_mixed_(Spain)	2	Q.ilex	53.2336
Medit_mixed_(Spain)	2	P.nigra	0.756667	35.5		Medit_mixed_(Spain)	2	P.nigra	35.5
Medit_mixed_(Spain)	2	P.nigra	0.933333	41.835		Medit_mixed_(Spain)	2	P.nigra	41.835
Medit_mixed_(Spain)	2	P.nigra	0.663333	33.1061		Medit_mixed_(Spain)	2	P.nigra	33.1061
Medit_mixed_(Spain)	2	P.nigra	0.796667	37.5295		Medit_mixed_(Spain)	2	P.nigra	37.5295
Medit_mixed_(Spain)	2	P.nigra	0.686667	39.6065		Medit_mixed_(Spain)	2	P.nigra	39.6065
Medit_mixed_(Spain)	2	P.nigra	0.74	35.7576		Medit_mixed_(Spain)	2	P.nigra	35.7576
Medit_mixed_(Spain)	2	P.nigra	0.873333	36.7424		Medit_mixed_(Spain)	2	P.nigra	36.7424
Medit_mixed_(Spain)	2	Q.faginea	4.59	132.144		Medit_mixed_(Spain)	2	Q.faginea	132.144
Medit_mixed_(Spain)	2	Q.faginea	2.12667	100.375		Medit_mixed_(Spain)	2	Q.faginea	100.375
Medit_mixed_(Spain)	2	Q.faginea	2.19	118.303		Medit_mixed_(Spain)	2	Q.faginea	118.303
Medit_mixed_(Spain)	2	Q.ilex	4.42	51.9475		Medit_mixed_(Spain)	2	Q.ilex	51.9475
Medit_mixed_(Spain)	2	P.nigra	0.606667	44.8333		Medit_mixed_(Spain)	2	P.nigra	44.8333
Medit_mixed_(Spain)	2	P.nigra	0.65	41.8295		Medit_mixed_(Spain)	2	P.nigra	41.8295
Medit_mixed_(Spain)	2	P.nigra	0.813333	41.3426		Medit_mixed_(Spain)	2	P.nigra	41.3426
Medit_mixed_(Spain)	2	P.nigra	0.756667	41.0833		Medit_mixed_(Spain)	2	P.nigra	41.0833
Medit_mixed_(Spain)	2	P.nigra	0.72	51.7956		Medit_mixed_(Spain)	2	P.nigra	51.7956
Medit_mixed_(Spain)	2	P.nigra	1.11333	35.5999		Medit_mixed_(Spain)	2	P.nigra	35.5999
Medit_mixed_(Spain)	2	P.nigra	0.816667	38.5438		Medit_mixed_(Spain)	2	P.nigra	38.5438
Medit_mixed_(Spain)	2	P.nigra	0.76	37.5231		Medit_mixed_(Spain)	2	P.nigra	37.5231
Medit_mixed_(Spain)	2	P.nigra	0.436667	44.4444		Medit_mixed_(Spain)	2	P.nigra	44.4444
Medit_mixed_(Spain)	2	P.nigra	0.73	37.7098		Medit_mixed_(Spain)	2	P.nigra	37.7098
Medit_mixed_(Spain)	2	P.sylvestris	0.286667	44.5833		Medit_mixed_(Spain)	2	P.sylvestris	44.5833
Medit_mixed_(Spain)	2	P.sylvestris	0.396667	33.1508		Medit_mixed_(Spain)	2	P.sylvestris	33.1508
Medit_mixed_(Spain)	2	P.sylvestris	0.316667	33.8889		Medit_mixed_(Spain)	2	P.sylvestris	33.8889
Medit_mixed_(Spain)	2	P.sylvestris	0.37	42.6389		Medit_mixed_(Spain)	2	P.sylvestris	42.6389
Medit_mixed_(Spain)	2	Q.ilex	4.13333	59.801		Medit_mixed_(Spain)	2	Q.ilex	59.801
Medit_mixed_(Spain)	2	P.nigra	0.693333	37.3194		Medit_mixed_(Spain)	2	P.nigra	37.3194
Medit_mixed_(Spain)	2	P.nigra	0.446667	44.1389		Medit_mixed_(Spain)	2	P.nigra	44.1389
Medit_mixed_(Spain)	2	P.nigra	0.61	38.6667		Medit_mixed_(Spain)	2	P.nigra	38.6667
Medit_mixed_(Spain)	2	P.sylvestris	0.206667	51.3234		Medit_mixed_(Spain)	2	P.sylvestris	51.3234
Medit_mixed_(Spain)	2	P.sylvestris	0.353333	43.0654		Medit_mixed_(Spain)	2	P.sylvestris	43.0654
Medit_mixed_(Spain)	2	P.sylvestris	0.24	33.6749		Medit_mixed_(Spain)	2	P.sylvestris	33.6749
Medit_mixed_(Spain)	2	P.nigra	1.09667	NA		Medit_mixed_(Spain)	2	P.nigra	NA
Medit_mixed_(Spain)	2	P.nigra	0.646667	34.8485		Medit_mixed_(Spain)	2	P.nigra	34.8485
Medit_mixed_(Spain)	2	P.nigra	0.686667	49.0476		Medit_mixed_(Spain)	2	P.nigra	49.0476
Medit_mixed_(Spain)	2	P.nigra	0.67	38.5185		Medit_mixed_(Spain)	2	P.nigra	38.5185
Medit_mixed_(Spain)	2	P.nigra	0.46	53.3333		Medit_mixed_(Spain)	2	P.nigra	53.3333
Medit_mixed_(Spain)	2	P.nigra	0.573333	51.3333		Medit_mixed_(Spain)	2	P.nigra	51.3333
Medit_mixed_(Spain)	2	P.nigra	0.943333	34.7495		Medit_mixed_(Spain)	2	P.nigra	34.7495
Medit_mixed_(Spain)	2	P.nigra	0.8	40.6818		Medit_mixed_(Spain)	2	P.nigra	40.6818
Medit_mixed_(Spain)	2	P.nigra	0.973333	36.3889		Medit_mixed_(Spain)	2	P.nigra	36.3889
Medit_mixed_(Spain)	2	P.nigra	1.25333	32.7368		Medit_mixed_(Spain)	2	P.nigra	32.7368
Medit_mixed_(Spain)	2	P.nigra	0.576667	41.7917		Medit_mixed_(Spain)	2	P.nigra	41.7917
Medit_mixed_(Spain)	2	P.nigra	0.766667	38.4461		Medit_mixed_(Spain)	2	P.nigra	38.4461
Medit_mixed_(Spain)	2	P.nigra	0.593333	39.1667		Medit_mixed_(Spain)	2	P.nigra	39.1667
Medit_mixed_(Spain)	2	P.sylvestris	0.313333	44.7697		Medit_mixed_(Spain)	2	P.sylvestris	44.7697
Medit_mixed_(Spain)	2	P.sylvestris	0.22	39.9079		Medit_mixed_(Spain)	2	P.sylvestris	39.9079
Medit_mixed_(Spain)	2	P.sylvestris	0.253333	50.734		Medit_mixed_(Spain)	2	P.sylvestris	50.734
Medit_mixed_(Spain)	2	P.sylvestris	0.426667	38.2742		Medit_mixed_(Spain)	2	P.sylvestris	38.2742
Medit_mixed_(Spain)	2	Q.faginea	3.40667	110.198		Medit_mixed_(Spain)	2	Q.faginea	110.198
Medit_mixed_(Spain)	2	Q.ilex	4.74333	46.5268		Medit_mixed_(Spain)	2	Q.ilex	46.5268
Medit_mixed_(Spain)	2	Q.ilex	5.18	51.9789		Medit_mixed_(Spain)	2	Q.ilex	51.9789
Medit_mixed_(Spain)	2	Q.ilex	3.83	66.8441		Medit_mixed_(Spain)	2	Q.ilex	66.8441
Medit_mixed_(Spain)	2	Q.faginea	2.45333	99.715		Medit_mixed_(Spain)	2	Q.faginea	99.715
Medit_mixed_(Spain)	2	Q.faginea	3.07	118.41		Medit_mixed_(Spain)	2	Q.faginea	118.41
Medit_mixed_(Spain)	2	Q.faginea	2.73333	110.897		Medit_mixed_(Spain)	2	Q.faginea	110.897
Medit_mixed_(Spain)	2	Q.faginea	4.37333	116.946		Medit_mixed_(Spain)	2	Q.faginea	116.946
Medit_mixed_(Spain)	2	Q.ilex	12.3967	52.8719		Medit_mixed_(Spain)	2	Q.ilex	52.8719
Medit_mixed_(Spain)	2	Q.ilex	4.33333	45.7396		Medit_mixed_(Spain)	2	Q.ilex	45.7396
Medit_mixed_(Spain)	2	Q.ilex	3.46333	43.8839		Medit_mixed_(Spain)	2	Q.ilex	43.8839
Medit_mixed_(Spain)	2	P.nigra	1.31	37.1156		Medit_mixed_(Spain)	2	P.nigra	37.1156
Medit_mixed_(Spain)	2	P.nigra	0.856667	41.6667		Medit_mixed_(Spain)	2	P.nigra	41.6667
Medit_mixed_(Spain)	2	Q.faginea	1.76333	120.268		Medit_mixed_(Spain)	2	Q.faginea	120.268
Medit_mixed_(Spain)	2	Q.faginea	4.61333	136.67		Medit_mixed_(Spain)	2	Q.faginea	136.67
Medit_mixed_(Spain)	2	Q.ilex	2.05667	36.3315		Medit_mixed_(Spain)	2	Q.ilex	36.3315
Medit_mixed_(Spain)	2	Q.ilex	2.93333	61.5046		Medit_mixed_(Spain)	2	Q.ilex	61.5046
Medit_mixed_(Spain)	2	Q.ilex	2.4	42.3892		Medit_mixed_(Spain)	2	Q.ilex	42.3892
Medit_mixed_(Spain)	2	Q.ilex	2.885	51.4679		Medit_mixed_(Spain)	2	Q.ilex	51.4679
Medit_mixed_(Spain)	2	Q.ilex	4.14667	55.4255		Medit_mixed_(Spain)	2	Q.ilex	55.4255
Medit_mixed_(Spain)	2	Q.ilex	4.23	44.613		Medit_mixed_(Spain)	2	Q.ilex	44.613
Medit_mixed_(Spain)	2	Q.ilex	3.51333	58.9555		Medit_mixed_(Spain)	2	Q.ilex	58.9555
Medit_mixed_(Spain)	2	Q.ilex	3.03	52.7465		Medit_mixed_(Spain)	2	Q.ilex	52.7465
Medit_mixed_(Spain)	2	P.nigra	0.946667	32.4493		Medit_mixed_(Spain)	2	P.nigra	32.4493
Medit_mixed_(Spain)	2	P.nigra	0.796667	38.697		Medit_mixed_(Spain)	2	P.nigra	38.697
Medit_mixed_(Spain)	2	Q.faginea	2.08	113.737		Medit_mixed_(Spain)	2	Q.faginea	113.737
Medit_mixed_(Spain)	2	Q.faginea	2.21	133.929		Medit_mixed_(Spain)	2	Q.faginea	133.929
Medit_mixed_(Spain)	2	Q.faginea	3.58333	116.758		Medit_mixed_(Spain)	2	Q.faginea	116.758
Medit_mixed_(Spain)	2	Q.faginea	2.61	122.333		Medit_mixed_(Spain)	2	Q.faginea	122.333
Medit_mixed_(Spain)	2	Q.ilex	3.03333	46.5734		Medit_mixed_(Spain)	2	Q.ilex	46.5734
Medit_mixed_(Spain)	2	Q.ilex	2.67	42.1719		Medit_mixed_(Spain)	2	Q.ilex	42.1719
Medit_mixed_(Spain)	2	Q.ilex	3.37667	55.3761		Medit_mixed_(Spain)	2	Q.ilex	55.3761
Medit_mixed_(Spain)	2	Q.ilex	3.19333	49.5216		Medit_mixed_(Spain)	2	Q.ilex	49.5216
Medit_mixed_(Spain)	2	Q.ilex	3.16	50.9429		Medit_mixed_(Spain)	2	Q.ilex	50.9429
Medit_mixed_(Spain)	3	P.nigra	0.833333	41.6835		Medit_mixed_(Spain)	3	P.nigra	41.6835
Medit_mixed_(Spain)	3	P.nigra	1.33333	36.5523		Medit_mixed_(Spain)	3	P.nigra	36.5523
Medit_mixed_(Spain)	3	P.nigra	0.82	47.4074		Medit_mixed_(Spain)	3	P.nigra	47.4074
Medit_mixed_(Spain)	3	P.nigra	1.15	39.246		Medit_mixed_(Spain)	3	P.nigra	39.246
Medit_mixed_(Spain)	3	P.nigra	0.943333	44.2879		Medit_mixed_(Spain)	3	P.nigra	44.2879
Medit_mixed_(Spain)	3	P.nigra	0.913333	38.0556		Medit_mixed_(Spain)	3	P.nigra	38.0556
Medit_mixed_(Spain)	3	P.nigra	0.796667	41.4646		Medit_mixed_(Spain)	3	P.nigra	41.4646
Medit_mixed_(Spain)	3	P.nigra	1.36667	51.2821		Medit_mixed_(Spain)	3	P.nigra	51.2821
Medit_mixed_(Spain)	3	P.nigra	0.896667	36.2734		Medit_mixed_(Spain)	3	P.nigra	36.2734
Medit_mixed_(Spain)	3	P.nigra	0.873333	41.3839		Medit_mixed_(Spain)	3	P.nigra	41.3839
Trop_dry_deciduous_(Bolivia)	34	Acosmium.cardenasii	2.14403	193.195		Trop_dry_deciduous_(Bolivia)	34	Acosmium.cardenasii	193.195
Trop_dry_deciduous_(Bolivia)	34	Acosmium.cardenasii	1.83787	183.798		Trop_dry_deciduous_(Bolivia)	34	Acosmium.cardenasii	183.798
Trop_dry_deciduous_(Bolivia)	34	Acosmium.cardenasii	1.48163	197.382		Trop_dry_deciduous_(Bolivia)	34	Acosmium.cardenasii	197.382
Trop_dry_deciduous_(Bolivia)	34	Acosmium.cardenasii	1.06138	138.825		Trop_dry_deciduous_(Bolivia)	34	Acosmium.cardenasii	138.825
Trop_dry_deciduous_(Bolivia)	34	Acosmium.cardenasii	0.687977	152.083		Trop_dry_deciduous_(Bolivia)	34	Acosmium.cardenasii	152.083
Trop_dry_deciduous_(Bolivia)	34	Acosmium.cardenasii	0.661983	180.541		Trop_dry_deciduous_(Bolivia)	34	Acosmium.cardenasii	180.541
Trop_dry_deciduous_(Bolivia)	34	Acosmium.cardenasii	1.02712	196.087		Trop_dry_deciduous_(Bolivia)	34	Acosmium.cardenasii	196.087
Trop_dry_deciduous_(Bolivia)	34	Acosmium.cardenasii	0.736382	184.096		Trop_dry_deciduous_(Bolivia)	34	Acosmium.cardenasii	184.096
Trop_dry_deciduous_(Bolivia)	34	Acosmium.cardenasii	0.74948	149.896		Trop_dry_deciduous_(Bolivia)	34	Acosmium.cardenasii	149.896
Trop_dry_deciduous_(Bolivia)	34	Acosmium.cardenasii	0.885001	147.5		Trop_dry_deciduous_(Bolivia)	34	Acosmium.cardenasii	147.5
Trop_dry_deciduous_(Bolivia)	34	Actinostemon.concepcionis	30.7779	295.9		Trop_dry_deciduous_(Bolivia)	34	Actinostemon.concepcionis	295.9
Trop_dry_deciduous_(Bolivia)	34	Actinostemon.concepcionis	27.7286	489.288		Trop_dry_deciduous_(Bolivia)	34	Actinostemon.concepcionis	489.288
Trop_dry_deciduous_(Bolivia)	34	Actinostemon.concepcionis	7.71921	310.077		Trop_dry_deciduous_(Bolivia)	34	Actinostemon.concepcionis	310.077
Trop_dry_deciduous_(Bolivia)	34	Actinostemon.concepcionis	8.85692	209.817		Trop_dry_deciduous_(Bolivia)	34	Actinostemon.concepcionis	209.817
Trop_dry_deciduous_(Bolivia)	34	Actinostemon.concepcionis	6.31634	232.983		Trop_dry_deciduous_(Bolivia)	34	Actinostemon.concepcionis	232.983
Trop_dry_deciduous_(Bolivia)	34	Actinostemon.concepcionis	1.23968	253.921		Trop_dry_deciduous_(Bolivia)	34	Actinostemon.concepcionis	253.921
Trop_dry_deciduous_(Bolivia)	34	Actinostemon.concepcionis	1.38273	273.602		Trop_dry_deciduous_(Bolivia)	34	Actinostemon.concepcionis	273.602
Trop_dry_deciduous_(Bolivia)	34	Actinostemon.concepcionis	1.42784	267.77		Trop_dry_deciduous_(Bolivia)	34	Actinostemon.concepcionis	267.77
Trop_dry_deciduous_(Bolivia)	34	Actinostemon.concepcionis	1.26264	251.033		Trop_dry_deciduous_(Bolivia)	34	Actinostemon.concepcionis	251.033
Trop_dry_deciduous_(Bolivia)	34	Actinostemon.concepcionis	1.19828	263.8		Trop_dry_deciduous_(Bolivia)	34	Actinostemon.concepcionis	263.8
Trop_dry_deciduous_(Bolivia)	34	Ampelocera.ruizii	41.8595	172.942		Trop_dry_deciduous_(Bolivia)	34	Ampelocera.ruizii	172.942
Trop_dry_deciduous_(Bolivia)	34	Ampelocera.ruizii	57.9476	164.655		Trop_dry_deciduous_(Bolivia)	34	Ampelocera.ruizii	164.655
Trop_dry_deciduous_(Bolivia)	34	Ampelocera.ruizii	37.5806	169.887		Trop_dry_deciduous_(Bolivia)	34	Ampelocera.ruizii	169.887
Trop_dry_deciduous_(Bolivia)	34	Ampelocera.ruizii	30.5027	169.083		Trop_dry_deciduous_(Bolivia)	34	Ampelocera.ruizii	169.083
Trop_dry_deciduous_(Bolivia)	34	Ampelocera.ruizii	43.2259	169.597		Trop_dry_deciduous_(Bolivia)	34	Ampelocera.ruizii	169.597
Trop_dry_deciduous_(Bolivia)	34	Ampelocera.ruizii	48.3933	163.491		Trop_dry_deciduous_(Bolivia)	34	Ampelocera.ruizii	163.491
Trop_dry_deciduous_(Bolivia)	34	Ampelocera.ruizii	36.4994	182.497		Trop_dry_deciduous_(Bolivia)	34	Ampelocera.ruizii	182.497
Trop_dry_deciduous_(Bolivia)	34	Ampelocera.ruizii	38.3933	153.143		Trop_dry_deciduous_(Bolivia)	34	Ampelocera.ruizii	153.143
Trop_dry_deciduous_(Bolivia)	34	Ampelocera.ruizii	43.4994	143.135		Trop_dry_deciduous_(Bolivia)	34	Ampelocera.ruizii	143.135
Trop_dry_deciduous_(Bolivia)	34	Ampelocera.ruizii	47.3933	163.491		Trop_dry_deciduous_(Bolivia)	34	Ampelocera.ruizii	163.491
Trop_dry_deciduous_(Bolivia)	34	Aspidosperma.cylindrocarpon	23.6711	148.453		Trop_dry_deciduous_(Bolivia)	34	Aspidosperma.cylindrocarpon	148.453
Trop_dry_deciduous_(Bolivia)	34	Aspidosperma.cylindrocarpon	48.5163	167.85		Trop_dry_deciduous_(Bolivia)	34	Aspidosperma.cylindrocarpon	167.85
Trop_dry_deciduous_(Bolivia)	34	Aspidosperma.cylindrocarpon	24.0951	140.105		Trop_dry_deciduous_(Bolivia)	34	Aspidosperma.cylindrocarpon	140.105
Trop_dry_deciduous_(Bolivia)	34	Aspidosperma.cylindrocarpon	42.2034	190.64		Trop_dry_deciduous_(Bolivia)	34	Aspidosperma.cylindrocarpon	190.64
Trop_dry_deciduous_(Bolivia)	34	Aspidosperma.cylindrocarpon	39.3079	142.915		Trop_dry_deciduous_(Bolivia)	34	Aspidosperma.cylindrocarpon	142.915
Trop_dry_deciduous_(Bolivia)	34	Aspidosperma.cylindrocarpon	44.8312	98.5301		Trop_dry_deciduous_(Bolivia)	34	Aspidosperma.cylindrocarpon	98.5301
Trop_dry_deciduous_(Bolivia)	34	Aspidosperma.cylindrocarpon	50.4454	101.398		Trop_dry_deciduous_(Bolivia)	34	Aspidosperma.cylindrocarpon	101.398
Trop_dry_deciduous_(Bolivia)	34	Aspidosperma.cylindrocarpon	39.7643	83.7143		Trop_dry_deciduous_(Bolivia)	34	Aspidosperma.cylindrocarpon	83.7143
Trop_dry_deciduous_(Bolivia)	34	Aspidosperma.cylindrocarpon	40.3986	171.181		Trop_dry_deciduous_(Bolivia)	34	Aspidosperma.cylindrocarpon	171.181
Trop_dry_deciduous_(Bolivia)	34	Aspidosperma.cylindrocarpon	25.3538	117.924		Trop_dry_deciduous_(Bolivia)	34	Aspidosperma.cylindrocarpon	117.924
Trop_dry_deciduous_(Bolivia)	34	Aspidosperma.tomentosum	28.9284	124.615		Trop_dry_deciduous_(Bolivia)	34	Aspidosperma.tomentosum	124.615
Trop_dry_deciduous_(Bolivia)	34	Aspidosperma.tomentosum	22.106	152.87		Trop_dry_deciduous_(Bolivia)	34	Aspidosperma.tomentosum	152.87
Trop_dry_deciduous_(Bolivia)	34	Aspidosperma.tomentosum	38.1491	131.233		Trop_dry_deciduous_(Bolivia)	34	Aspidosperma.tomentosum	131.233
Trop_dry_deciduous_(Bolivia)	34	Aspidosperma.tomentosum	35.3858	149.635		Trop_dry_deciduous_(Bolivia)	34	Aspidosperma.tomentosum	149.635
Trop_dry_deciduous_(Bolivia)	34	Aspidosperma.tomentosum	37.1085	106.543		Trop_dry_deciduous_(Bolivia)	34	Aspidosperma.tomentosum	106.543
Trop_dry_deciduous_(Bolivia)	34	Aspidosperma.tomentosum	35.67	160.314		Trop_dry_deciduous_(Bolivia)	34	Aspidosperma.tomentosum	160.314
Trop_dry_deciduous_(Bolivia)	34	Aspidosperma.tomentosum	13.2459	174.288		Trop_dry_deciduous_(Bolivia)	34	Aspidosperma.tomentosum	174.288
Trop_dry_deciduous_(Bolivia)	34	Aspidosperma.tomentosum	20.8753	202.019		Trop_dry_deciduous_(Bolivia)	34	Aspidosperma.tomentosum	202.019
Trop_dry_deciduous_(Bolivia)	34	Aspidosperma.tomentosum	9.39821	163.447		Trop_dry_deciduous_(Bolivia)	34	Aspidosperma.tomentosum	163.447
Trop_dry_deciduous_(Bolivia)	34	Aspidosperma.tomentosum	48.2614	170.837		Trop_dry_deciduous_(Bolivia)	34	Aspidosperma.tomentosum	170.837
Trop_dry_deciduous_(Bolivia)	34	Astronium.urundeuva	16.3336	121.685		Trop_dry_deciduous_(Bolivia)	34	Astronium.urundeuva	121.685
Trop_dry_deciduous_(Bolivia)	34	Astronium.urundeuva	24.0247	98.44		Trop_dry_deciduous_(Bolivia)	34	Astronium.urundeuva	98.44
Trop_dry_deciduous_(Bolivia)	34	Astronium.urundeuva	13.7713	127.005		Trop_dry_deciduous_(Bolivia)	34	Astronium.urundeuva	127.005
Trop_dry_deciduous_(Bolivia)	34	Astronium.urundeuva	10.6916	114.297		Trop_dry_deciduous_(Bolivia)	34	Astronium.urundeuva	114.297
Trop_dry_deciduous_(Bolivia)	34	Astronium.urundeuva	17.2725	95.7075		Trop_dry_deciduous_(Bolivia)	34	Astronium.urundeuva	95.7075
Trop_dry_deciduous_(Bolivia)	34	Astronium.urundeuva	16.6231	127.87		Trop_dry_deciduous_(Bolivia)	34	Astronium.urundeuva	127.87
Trop_dry_deciduous_(Bolivia)	34	Astronium.urundeuva	13.3529	197.821		Trop_dry_deciduous_(Bolivia)	34	Astronium.urundeuva	197.821
Trop_dry_deciduous_(Bolivia)	34	Astronium.urundeuva	26.3494	188.21		Trop_dry_deciduous_(Bolivia)	34	Astronium.urundeuva	188.21
Trop_dry_deciduous_(Bolivia)	34	Astronium.urundeuva	12.8648	227.025		Trop_dry_deciduous_(Bolivia)	34	Astronium.urundeuva	227.025
Trop_dry_deciduous_(Bolivia)	34	Astronium.urundeuva	12.7609	159.512		Trop_dry_deciduous_(Bolivia)	34	Astronium.urundeuva	159.512
Trop_dry_deciduous_(Bolivia)	34	Bougainvillea.modesta	34.0351	182.582		Trop_dry_deciduous_(Bolivia)	34	Bougainvillea.modesta	182.582
Trop_dry_deciduous_(Bolivia)	34	Bougainvillea.modesta	34.0896	199.445		Trop_dry_deciduous_(Bolivia)	34	Bougainvillea.modesta	199.445
Trop_dry_deciduous_(Bolivia)	34	Bougainvillea.modesta	17.7525	167.407		Trop_dry_deciduous_(Bolivia)	34	Bougainvillea.modesta	167.407
Trop_dry_deciduous_(Bolivia)	34	Bougainvillea.modesta	45.9828	143.972		Trop_dry_deciduous_(Bolivia)	34	Bougainvillea.modesta	143.972
Trop_dry_deciduous_(Bolivia)	34	Bougainvillea.modesta	34.2872	171.89		Trop_dry_deciduous_(Bolivia)	34	Bougainvillea.modesta	171.89
Trop_dry_deciduous_(Bolivia)	34	Bougainvillea.modesta	19.8056	112.532		Trop_dry_deciduous_(Bolivia)	34	Bougainvillea.modesta	112.532
Trop_dry_deciduous_(Bolivia)	34	Bougainvillea.modesta	21.4149	167.96		Trop_dry_deciduous_(Bolivia)	34	Bougainvillea.modesta	167.96
Trop_dry_deciduous_(Bolivia)	34	Bougainvillea.modesta	24.8454	149.671		Trop_dry_deciduous_(Bolivia)	34	Bougainvillea.modesta	149.671
Trop_dry_deciduous_(Bolivia)	34	Bougainvillea.modesta	13.8782	138.782		Trop_dry_deciduous_(Bolivia)	34	Bougainvillea.modesta	138.782
Trop_dry_deciduous_(Bolivia)	34	Bougainvillea.modesta	17.6437	187.699		Trop_dry_deciduous_(Bolivia)	34	Bougainvillea.modesta	187.699
Trop_dry_deciduous_(Bolivia)	34	Caesalpinia.pluviosa	6.01168	151.708		Trop_dry_deciduous_(Bolivia)	34	Caesalpinia.pluviosa	151.708
Trop_dry_deciduous_(Bolivia)	34	Caesalpinia.pluviosa	7.53688	200.71		Trop_dry_deciduous_(Bolivia)	34	Caesalpinia.pluviosa	200.71
Trop_dry_deciduous_(Bolivia)	34	Caesalpinia.pluviosa	10.2897	130.59		Trop_dry_deciduous_(Bolivia)	34	Caesalpinia.pluviosa	130.59
Trop_dry_deciduous_(Bolivia)	34	Caesalpinia.pluviosa	5.55394	138.248		Trop_dry_deciduous_(Bolivia)	34	Caesalpinia.pluviosa	138.248
Trop_dry_deciduous_(Bolivia)	34	Caesalpinia.pluviosa	7.96878	163.205		Trop_dry_deciduous_(Bolivia)	34	Caesalpinia.pluviosa	163.205
Trop_dry_deciduous_(Bolivia)	34	Caesalpinia.pluviosa	0.450009	160.003		Trop_dry_deciduous_(Bolivia)	34	Caesalpinia.pluviosa	160.003
Trop_dry_deciduous_(Bolivia)	34	Caesalpinia.pluviosa	0.813229	137.623		Trop_dry_deciduous_(Bolivia)	34	Caesalpinia.pluviosa	137.623
Trop_dry_deciduous_(Bolivia)	34	Caesalpinia.pluviosa	1.61052	161.052		Trop_dry_deciduous_(Bolivia)	34	Caesalpinia.pluviosa	161.052
Trop_dry_deciduous_(Bolivia)	34	Caesalpinia.pluviosa	0.733146	196.616		Trop_dry_deciduous_(Bolivia)	34	Caesalpinia.pluviosa	196.616
Trop_dry_deciduous_(Bolivia)	34	Caesalpinia.pluviosa	2.56151	216.743		Trop_dry_deciduous_(Bolivia)	34	Caesalpinia.pluviosa	216.743
Trop_dry_deciduous_(Bolivia)	34	Capparis.prisca	125.316	86.725		Trop_dry_deciduous_(Bolivia)	34	Capparis.prisca	86.725
Trop_dry_deciduous_(Bolivia)	34	Capparis.prisca	186.468	109.102		Trop_dry_deciduous_(Bolivia)	34	Capparis.prisca	109.102
Trop_dry_deciduous_(Bolivia)	34	Capparis.prisca	195.446	105.745		Trop_dry_deciduous_(Bolivia)	34	Capparis.prisca	105.745
Trop_dry_deciduous_(Bolivia)	34	Capparis.prisca	83.644	103.665		Trop_dry_deciduous_(Bolivia)	34	Capparis.prisca	103.665
Trop_dry_deciduous_(Bolivia)	34	Capparis.prisca	131.749	87.7175		Trop_dry_deciduous_(Bolivia)	34	Capparis.prisca	87.7175
Trop_dry_deciduous_(Bolivia)	34	Capparis.prisca	91.8464	119.281		Trop_dry_deciduous_(Bolivia)	34	Capparis.prisca	119.281
Trop_dry_deciduous_(Bolivia)	34	Capparis.prisca	95.7158	75.6647		Trop_dry_deciduous_(Bolivia)	34	Capparis.prisca	75.6647
Trop_dry_deciduous_(Bolivia)	34	Capparis.prisca	40.0566	134.644		Trop_dry_deciduous_(Bolivia)	34	Capparis.prisca	134.644
Trop_dry_deciduous_(Bolivia)	34	Capparis.prisca	52.6438	112.607		Trop_dry_deciduous_(Bolivia)	34	Capparis.prisca	112.607
Trop_dry_deciduous_(Bolivia)	34	Capparis.prisca	84.812	104.384		Trop_dry_deciduous_(Bolivia)	34	Capparis.prisca	104.384
Trop_dry_deciduous_(Bolivia)	34	Casearia.gossypiosperma	31.4337	174.873		Trop_dry_deciduous_(Bolivia)	34	Casearia.gossypiosperma	174.873
Trop_dry_deciduous_(Bolivia)	34	Casearia.gossypiosperma	28.2188	198.55		Trop_dry_deciduous_(Bolivia)	34	Casearia.gossypiosperma	198.55
Trop_dry_deciduous_(Bolivia)	34	Casearia.gossypiosperma	26.0046	212.43		Trop_dry_deciduous_(Bolivia)	34	Casearia.gossypiosperma	212.43
Trop_dry_deciduous_(Bolivia)	34	Casearia.gossypiosperma	34.3608	193.625		Trop_dry_deciduous_(Bolivia)	34	Casearia.gossypiosperma	193.625
Trop_dry_deciduous_(Bolivia)	34	Casearia.gossypiosperma	27.067	208.14		Trop_dry_deciduous_(Bolivia)	34	Casearia.gossypiosperma	208.14
Trop_dry_deciduous_(Bolivia)	34	Casearia.gossypiosperma	27.7163	257.826		Trop_dry_deciduous_(Bolivia)	34	Casearia.gossypiosperma	257.826
Trop_dry_deciduous_(Bolivia)	34	Casearia.gossypiosperma	20.1971	230.824		Trop_dry_deciduous_(Bolivia)	34	Casearia.gossypiosperma	230.824
Trop_dry_deciduous_(Bolivia)	34	Casearia.gossypiosperma	13.4097	253.928		Trop_dry_deciduous_(Bolivia)	34	Casearia.gossypiosperma	253.928
Trop_dry_deciduous_(Bolivia)	34	Casearia.gossypiosperma	12.8862	247.271		Trop_dry_deciduous_(Bolivia)	34	Casearia.gossypiosperma	247.271
Trop_dry_deciduous_(Bolivia)	34	Casearia.gossypiosperma	22.1835	232.693		Trop_dry_deciduous_(Bolivia)	34	Casearia.gossypiosperma	232.693
Trop_dry_deciduous_(Bolivia)	34	Ceiba.samauma	14.9131	130.145		Trop_dry_deciduous_(Bolivia)	34	Ceiba.samauma	130.145
Trop_dry_deciduous_(Bolivia)	34	Ceiba.samauma	21.0246	115.04		Trop_dry_deciduous_(Bolivia)	34	Ceiba.samauma	115.04
Trop_dry_deciduous_(Bolivia)	34	Ceiba.samauma	28.2961	118.89		Trop_dry_deciduous_(Bolivia)	34	Ceiba.samauma	118.89
Trop_dry_deciduous_(Bolivia)	34	Ceiba.samauma	13.6135	133.137		Trop_dry_deciduous_(Bolivia)	34	Ceiba.samauma	133.137
Trop_dry_deciduous_(Bolivia)	34	Ceiba.samauma	35.816	132.73		Trop_dry_deciduous_(Bolivia)	34	Ceiba.samauma	132.73
Trop_dry_deciduous_(Bolivia)	34	Ceiba.samauma	10.9219	256.987		Trop_dry_deciduous_(Bolivia)	34	Ceiba.samauma	256.987
Trop_dry_deciduous_(Bolivia)	34	Ceiba.samauma	11.2685	243.644		Trop_dry_deciduous_(Bolivia)	34	Ceiba.samauma	243.644
Trop_dry_deciduous_(Bolivia)	34	Ceiba.samauma	16.0374	200.468		Trop_dry_deciduous_(Bolivia)	34	Ceiba.samauma	200.468
Trop_dry_deciduous_(Bolivia)	34	Ceiba.samauma	8.969	218.756		Trop_dry_deciduous_(Bolivia)	34	Ceiba.samauma	218.756
Trop_dry_deciduous_(Bolivia)	34	Ceiba.samauma	16.1456	242.184		Trop_dry_deciduous_(Bolivia)	34	Ceiba.samauma	242.184
Trop_dry_deciduous_(Bolivia)	34	Centrolobium.microchaete	27.3161	237.24		Trop_dry_deciduous_(Bolivia)	34	Centrolobium.microchaete	237.24
Trop_dry_deciduous_(Bolivia)	34	Centrolobium.microchaete	20.5078	191.612		Trop_dry_deciduous_(Bolivia)	34	Centrolobium.microchaete	191.612
Trop_dry_deciduous_(Bolivia)	34	Centrolobium.microchaete	26.6694	171.273		Trop_dry_deciduous_(Bolivia)	34	Centrolobium.microchaete	171.273
Trop_dry_deciduous_(Bolivia)	34	Centrolobium.microchaete	16.269	236.89		Trop_dry_deciduous_(Bolivia)	34	Centrolobium.microchaete	236.89
Trop_dry_deciduous_(Bolivia)	34	Centrolobium.microchaete	12.2065	364.588		Trop_dry_deciduous_(Bolivia)	34	Centrolobium.microchaete	364.588
Trop_dry_deciduous_(Bolivia)	34	Centrolobium.microchaete	32.5761	176.087		Trop_dry_deciduous_(Bolivia)	34	Centrolobium.microchaete	176.087
Trop_dry_deciduous_(Bolivia)	34	Centrolobium.microchaete	46.3231	236.342		Trop_dry_deciduous_(Bolivia)	34	Centrolobium.microchaete	236.342
Trop_dry_deciduous_(Bolivia)	34	Centrolobium.microchaete	33.9979	309.072		Trop_dry_deciduous_(Bolivia)	34	Centrolobium.microchaete	309.072
Trop_dry_deciduous_(Bolivia)	34	Centrolobium.microchaete	74.9051	209.525		Trop_dry_deciduous_(Bolivia)	34	Centrolobium.microchaete	209.525
Trop_dry_deciduous_(Bolivia)	34	Centrolobium.microchaete	36.5022	270.387		Trop_dry_deciduous_(Bolivia)	34	Centrolobium.microchaete	270.387
Trop_dry_deciduous_(Bolivia)	34	Combretum.leprosum	78.5581	171.235		Trop_dry_deciduous_(Bolivia)	34	Combretum.leprosum	171.235
Trop_dry_deciduous_(Bolivia)	34	Combretum.leprosum	60.5627	175.632		Trop_dry_deciduous_(Bolivia)	34	Combretum.leprosum	175.632
Trop_dry_deciduous_(Bolivia)	34	Combretum.leprosum	47.5103	163.593		Trop_dry_deciduous_(Bolivia)	34	Combretum.leprosum	163.593
Trop_dry_deciduous_(Bolivia)	34	Combretum.leprosum	83.7697	147.558		Trop_dry_deciduous_(Bolivia)	34	Combretum.leprosum	147.558
Trop_dry_deciduous_(Bolivia)	34	Combretum.leprosum	177.686	182.935		Trop_dry_deciduous_(Bolivia)	34	Combretum.leprosum	182.935
Trop_dry_deciduous_(Bolivia)	34	Combretum.leprosum	155.536	178.777		Trop_dry_deciduous_(Bolivia)	34	Combretum.leprosum	178.777
Trop_dry_deciduous_(Bolivia)	34	Combretum.leprosum	162.57	143.868		Trop_dry_deciduous_(Bolivia)	34	Combretum.leprosum	143.868
Trop_dry_deciduous_(Bolivia)	34	Combretum.leprosum	323.206	117.958		Trop_dry_deciduous_(Bolivia)	34	Combretum.leprosum	117.958
Trop_dry_deciduous_(Bolivia)	34	Combretum.leprosum	289.489	121.634		Trop_dry_deciduous_(Bolivia)	34	Combretum.leprosum	121.634
Trop_dry_deciduous_(Bolivia)	34	Combretum.leprosum	187.77	131.308		Trop_dry_deciduous_(Bolivia)	34	Combretum.leprosum	131.308
Trop_dry_deciduous_(Bolivia)	34	Erythroxylum.daphnites	12.004	238.52		Trop_dry_deciduous_(Bolivia)	34	Erythroxylum.daphnites	238.52
Trop_dry_deciduous_(Bolivia)	34	Erythroxylum.daphnites	9.91513	269.515		Trop_dry_deciduous_(Bolivia)	34	Erythroxylum.daphnites	269.515
Trop_dry_deciduous_(Bolivia)	34	Erythroxylum.daphnites	9.89534	256.495		Trop_dry_deciduous_(Bolivia)	34	Erythroxylum.daphnites	256.495
Trop_dry_deciduous_(Bolivia)	34	Erythroxylum.daphnites	12.4712	262.618		Trop_dry_deciduous_(Bolivia)	34	Erythroxylum.daphnites	262.618
Trop_dry_deciduous_(Bolivia)	34	Erythroxylum.daphnites	10.5415	250.095		Trop_dry_deciduous_(Bolivia)	34	Erythroxylum.daphnites	250.095
Trop_dry_deciduous_(Bolivia)	34	Erythroxylum.daphnites	6.84486	140.008		Trop_dry_deciduous_(Bolivia)	34	Erythroxylum.daphnites	140.008
Trop_dry_deciduous_(Bolivia)	34	Erythroxylum.daphnites	4.29081	112.916		Trop_dry_deciduous_(Bolivia)	34	Erythroxylum.daphnites	112.916
Trop_dry_deciduous_(Bolivia)	34	Erythroxylum.daphnites	17.408	145.067		Trop_dry_deciduous_(Bolivia)	34	Erythroxylum.daphnites	145.067
Trop_dry_deciduous_(Bolivia)	34	Erythroxylum.daphnites	5.98394	163.198		Trop_dry_deciduous_(Bolivia)	34	Erythroxylum.daphnites	163.198
Trop_dry_deciduous_(Bolivia)	34	Erythroxylum.daphnites	6.45453	197.222		Trop_dry_deciduous_(Bolivia)	34	Erythroxylum.daphnites	197.222
Trop_dry_deciduous_(Bolivia)	34	Gallesia.integrifolia	27.1692	197.108		Trop_dry_deciduous_(Bolivia)	34	Gallesia.integrifolia	197.108
Trop_dry_deciduous_(Bolivia)	34	Gallesia.integrifolia	41.1812	188.945		Trop_dry_deciduous_(Bolivia)	34	Gallesia.integrifolia	188.945
Trop_dry_deciduous_(Bolivia)	34	Gallesia.integrifolia	61.0614	282.282		Trop_dry_deciduous_(Bolivia)	34	Gallesia.integrifolia	282.282
Trop_dry_deciduous_(Bolivia)	34	Gallesia.integrifolia	48.6227	140.303		Trop_dry_deciduous_(Bolivia)	34	Gallesia.integrifolia	140.303
Trop_dry_deciduous_(Bolivia)	34	Gallesia.integrifolia	39.024	244.61		Trop_dry_deciduous_(Bolivia)	34	Gallesia.integrifolia	244.61
Trop_dry_deciduous_(Bolivia)	34	Gallesia.integrifolia	55.0483	344.052		Trop_dry_deciduous_(Bolivia)	34	Gallesia.integrifolia	344.052
Trop_dry_deciduous_(Bolivia)	34	Gallesia.integrifolia	26.8181	148.989		Trop_dry_deciduous_(Bolivia)	34	Gallesia.integrifolia	148.989
Trop_dry_deciduous_(Bolivia)	34	Gallesia.integrifolia	61.3624	211.594		Trop_dry_deciduous_(Bolivia)	34	Gallesia.integrifolia	211.594
Trop_dry_deciduous_(Bolivia)	34	Gallesia.integrifolia	65.7487	246.558		Trop_dry_deciduous_(Bolivia)	34	Gallesia.integrifolia	246.558
Trop_dry_deciduous_(Bolivia)	34	Gallesia.integrifolia	75.3053	147.658		Trop_dry_deciduous_(Bolivia)	34	Gallesia.integrifolia	147.658
Trop_dry_deciduous_(Bolivia)	34	Jacaratia.sp.	93.9669	460.308		Trop_dry_deciduous_(Bolivia)	34	Jacaratia.sp.	460.308
Trop_dry_deciduous_(Bolivia)	34	Jacaratia.sp.	120.538	479.582		Trop_dry_deciduous_(Bolivia)	34	Jacaratia.sp.	479.582
Trop_dry_deciduous_(Bolivia)	34	Jacaratia.sp.	50.2007	505.67		Trop_dry_deciduous_(Bolivia)	34	Jacaratia.sp.	505.67
Trop_dry_deciduous_(Bolivia)	34	Jacaratia.sp.	135.732	554.365		Trop_dry_deciduous_(Bolivia)	34	Jacaratia.sp.	554.365
Trop_dry_deciduous_(Bolivia)	34	Jacaratia.sp.	93.7601	513.357		Trop_dry_deciduous_(Bolivia)	34	Jacaratia.sp.	513.357
Trop_dry_deciduous_(Bolivia)	34	Jacaratia.sp.	106.436	507.617		Trop_dry_deciduous_(Bolivia)	34	Jacaratia.sp.	507.617
Trop_dry_deciduous_(Bolivia)	34	Jacaratia.sp.	102.348	682.319		Trop_dry_deciduous_(Bolivia)	34	Jacaratia.sp.	682.319
Trop_dry_deciduous_(Bolivia)	34	Jacaratia.sp.	117.585	534.479		Trop_dry_deciduous_(Bolivia)	34	Jacaratia.sp.	534.479
Trop_dry_deciduous_(Bolivia)	34	Jacaratia.sp.	89.0289	545.075		Trop_dry_deciduous_(Bolivia)	34	Jacaratia.sp.	545.075
Trop_dry_deciduous_(Bolivia)	34	Jacaratia.sp.	116.436	436.403		Trop_dry_deciduous_(Bolivia)	34	Jacaratia.sp.	436.403
Trop_dry_deciduous_(Bolivia)	34	Manihot.guaranitica	119.547	239.093		Trop_dry_deciduous_(Bolivia)	34	Manihot.guaranitica	239.093
Trop_dry_deciduous_(Bolivia)	34	Manihot.guaranitica	179.913	196.626		Trop_dry_deciduous_(Bolivia)	34	Manihot.guaranitica	196.626
Trop_dry_deciduous_(Bolivia)	34	Manihot.guaranitica	90.1677	222.636		Trop_dry_deciduous_(Bolivia)	34	Manihot.guaranitica	222.636
Trop_dry_deciduous_(Bolivia)	34	Manihot.guaranitica	79.6054	234.134		Trop_dry_deciduous_(Bolivia)	34	Manihot.guaranitica	234.134
Trop_dry_deciduous_(Bolivia)	34	Manihot.guaranitica	62.946	242.1		Trop_dry_deciduous_(Bolivia)	34	Manihot.guaranitica	242.1
Trop_dry_deciduous_(Bolivia)	34	Manihot.guaranitica	360.884	206.06		Trop_dry_deciduous_(Bolivia)	34	Manihot.guaranitica	206.06
Trop_dry_deciduous_(Bolivia)	34	Manihot.guaranitica	225.098	284.38		Trop_dry_deciduous_(Bolivia)	34	Manihot.guaranitica	284.38
Trop_dry_deciduous_(Bolivia)	34	Manihot.guaranitica	175.444	281.59		Trop_dry_deciduous_(Bolivia)	34	Manihot.guaranitica	281.59
Trop_dry_deciduous_(Bolivia)	34	Manihot.guaranitica	209.111	276.32		Trop_dry_deciduous_(Bolivia)	34	Manihot.guaranitica	276.32
Trop_dry_deciduous_(Bolivia)	34	Manihot.guaranitica	154.955	254.668		Trop_dry_deciduous_(Bolivia)	34	Manihot.guaranitica	254.668
Trop_dry_deciduous_(Bolivia)	34	Manihot.guaranitica	120.13	201.06		Trop_dry_deciduous_(Bolivia)	34	Manihot.guaranitica	201.06
Trop_dry_deciduous_(Bolivia)	34	Manihot.guaranitica	67.0213	205.215		Trop_dry_deciduous_(Bolivia)	34	Manihot.guaranitica	205.215
Trop_dry_deciduous_(Bolivia)	34	Manihot.guaranitica	119.758	201.665		Trop_dry_deciduous_(Bolivia)	34	Manihot.guaranitica	201.665
Trop_dry_deciduous_(Bolivia)	34	Manihot.guaranitica	132.004	221.495		Trop_dry_deciduous_(Bolivia)	34	Manihot.guaranitica	221.495
Trop_dry_deciduous_(Bolivia)	34	Manihot.guaranitica	222.879	231.745		Trop_dry_deciduous_(Bolivia)	34	Manihot.guaranitica	231.745
Trop_dry_deciduous_(Bolivia)	34	Myrciaria.cauliflora	5.64624	114.248		Trop_dry_deciduous_(Bolivia)	34	Myrciaria.cauliflora	114.248
Trop_dry_deciduous_(Bolivia)	34	Myrciaria.cauliflora	3.84789	156.282		Trop_dry_deciduous_(Bolivia)	34	Myrciaria.cauliflora	156.282
Trop_dry_deciduous_(Bolivia)	34	Myrciaria.cauliflora	2.53075	213.5		Trop_dry_deciduous_(Bolivia)	34	Myrciaria.cauliflora	213.5
Trop_dry_deciduous_(Bolivia)	34	Myrciaria.cauliflora	2.75075	169.435		Trop_dry_deciduous_(Bolivia)	34	Myrciaria.cauliflora	169.435
Trop_dry_deciduous_(Bolivia)	34	Myrciaria.cauliflora	2.38029	170.7		Trop_dry_deciduous_(Bolivia)	34	Myrciaria.cauliflora	170.7
Trop_dry_deciduous_(Bolivia)	34	Myrciaria.cauliflora	3.74477	130.253		Trop_dry_deciduous_(Bolivia)	34	Myrciaria.cauliflora	130.253
Trop_dry_deciduous_(Bolivia)	34	Myrciaria.cauliflora	3.12117	158.32		Trop_dry_deciduous_(Bolivia)	34	Myrciaria.cauliflora	158.32
Trop_dry_deciduous_(Bolivia)	34	Myrciaria.cauliflora	1.85431	130.893		Trop_dry_deciduous_(Bolivia)	34	Myrciaria.cauliflora	130.893
Trop_dry_deciduous_(Bolivia)	34	Myrciaria.cauliflora	1.95313	154.194		Trop_dry_deciduous_(Bolivia)	34	Myrciaria.cauliflora	154.194
Trop_dry_deciduous_(Bolivia)	34	Myrciaria.cauliflora	2.10028	140.957		Trop_dry_deciduous_(Bolivia)	34	Myrciaria.cauliflora	140.957
Trop_dry_deciduous_(Bolivia)	34	Ouratea.sp.	46.3244	78.3175		Trop_dry_deciduous_(Bolivia)	34	Ouratea.sp.	78.3175
Trop_dry_deciduous_(Bolivia)	34	Ouratea.sp.	82.2092	87.1		Trop_dry_deciduous_(Bolivia)	34	Ouratea.sp.	87.1
Trop_dry_deciduous_(Bolivia)	34	Ouratea.sp.	89.7201	76.705		Trop_dry_deciduous_(Bolivia)	34	Ouratea.sp.	76.705
Trop_dry_deciduous_(Bolivia)	34	Ouratea.sp.	35.844	99.3		Trop_dry_deciduous_(Bolivia)	34	Ouratea.sp.	99.3
Trop_dry_deciduous_(Bolivia)	34	Ouratea.sp.	50.3822	98.8725		Trop_dry_deciduous_(Bolivia)	34	Ouratea.sp.	98.8725
Trop_dry_deciduous_(Bolivia)	34	Ouratea.sp.	47.4588	101.697		Trop_dry_deciduous_(Bolivia)	34	Ouratea.sp.	101.697
Trop_dry_deciduous_(Bolivia)	34	Ouratea.sp.	33.6406	101.941		Trop_dry_deciduous_(Bolivia)	34	Ouratea.sp.	101.941
Trop_dry_deciduous_(Bolivia)	34	Ouratea.sp.	17.3157	102.866		Trop_dry_deciduous_(Bolivia)	34	Ouratea.sp.	102.866
Trop_dry_deciduous_(Bolivia)	34	Ouratea.sp.	34.4565	103.629		Trop_dry_deciduous_(Bolivia)	34	Ouratea.sp.	103.629
Trop_dry_deciduous_(Bolivia)	34	Ouratea.sp.	214.368	104.57		Trop_dry_deciduous_(Bolivia)	34	Ouratea.sp.	104.57
Trop_dry_deciduous_(Bolivia)	34	Phyllostylon.rhamnoides	7.54946	115.632		Trop_dry_deciduous_(Bolivia)	34	Phyllostylon.rhamnoides	115.632
Trop_dry_deciduous_(Bolivia)	34	Phyllostylon.rhamnoides	18.6141	182.14		Trop_dry_deciduous_(Bolivia)	34	Phyllostylon.rhamnoides	182.14
Trop_dry_deciduous_(Bolivia)	34	Phyllostylon.rhamnoides	21.5834	142.947		Trop_dry_deciduous_(Bolivia)	34	Phyllostylon.rhamnoides	142.947
Trop_dry_deciduous_(Bolivia)	34	Phyllostylon.rhamnoides	7.72502	154.5		Trop_dry_deciduous_(Bolivia)	34	Phyllostylon.rhamnoides	154.5
Trop_dry_deciduous_(Bolivia)	34	Phyllostylon.rhamnoides	15.1075	118.972		Trop_dry_deciduous_(Bolivia)	34	Phyllostylon.rhamnoides	118.972
Trop_dry_deciduous_(Bolivia)	34	Phyllostylon.rhamnoides	10.0877	183.412		Trop_dry_deciduous_(Bolivia)	34	Phyllostylon.rhamnoides	183.412
Trop_dry_deciduous_(Bolivia)	34	Phyllostylon.rhamnoides	11.0293	187.772		Trop_dry_deciduous_(Bolivia)	34	Phyllostylon.rhamnoides	187.772
Trop_dry_deciduous_(Bolivia)	34	Phyllostylon.rhamnoides	10.9928	189.191		Trop_dry_deciduous_(Bolivia)	34	Phyllostylon.rhamnoides	189.191
Trop_dry_deciduous_(Bolivia)	34	Phyllostylon.rhamnoides	12.5534	188.837		Trop_dry_deciduous_(Bolivia)	34	Phyllostylon.rhamnoides	188.837
Trop_dry_deciduous_(Bolivia)	34	Phyllostylon.rhamnoides	12.1773	182.206		Trop_dry_deciduous_(Bolivia)	34	Phyllostylon.rhamnoides	182.206
Trop_dry_deciduous_(Bolivia)	34	Pogonopus.tubulosus	83.1708	228.78		Trop_dry_deciduous_(Bolivia)	34	Pogonopus.tubulosus	228.78
Trop_dry_deciduous_(Bolivia)	34	Pogonopus.tubulosus	130.534	231.41		Trop_dry_deciduous_(Bolivia)	34	Pogonopus.tubulosus	231.41
Trop_dry_deciduous_(Bolivia)	34	Pogonopus.tubulosus	79.4733	274.638		Trop_dry_deciduous_(Bolivia)	34	Pogonopus.tubulosus	274.638
Trop_dry_deciduous_(Bolivia)	34	Pogonopus.tubulosus	127.996	247.49		Trop_dry_deciduous_(Bolivia)	34	Pogonopus.tubulosus	247.49
Trop_dry_deciduous_(Bolivia)	34	Pogonopus.tubulosus	84.9437	233.605		Trop_dry_deciduous_(Bolivia)	34	Pogonopus.tubulosus	233.605
Trop_dry_deciduous_(Bolivia)	34	Pogonopus.tubulosus	126.838	283.965		Trop_dry_deciduous_(Bolivia)	34	Pogonopus.tubulosus	283.965
Trop_dry_deciduous_(Bolivia)	34	Pogonopus.tubulosus	201.375	278.195		Trop_dry_deciduous_(Bolivia)	34	Pogonopus.tubulosus	278.195
Trop_dry_deciduous_(Bolivia)	34	Pogonopus.tubulosus	287.099	219.16		Trop_dry_deciduous_(Bolivia)	34	Pogonopus.tubulosus	219.16
Trop_dry_deciduous_(Bolivia)	34	Pogonopus.tubulosus	190.188	297.168		Trop_dry_deciduous_(Bolivia)	34	Pogonopus.tubulosus	297.168
Trop_dry_deciduous_(Bolivia)	34	Pogonopus.tubulosus	201.375	265.069		Trop_dry_deciduous_(Bolivia)	34	Pogonopus.tubulosus	265.069
Trop_dry_deciduous_(Bolivia)	34	Simira.rubescens	74.0057	303.143		Trop_dry_deciduous_(Bolivia)	34	Simira.rubescens	303.143
Trop_dry_deciduous_(Bolivia)	34	Simira.rubescens	57.1556	188.772		Trop_dry_deciduous_(Bolivia)	34	Simira.rubescens	188.772
Trop_dry_deciduous_(Bolivia)	34	Simira.rubescens	60.5442	174.28		Trop_dry_deciduous_(Bolivia)	34	Simira.rubescens	174.28
Trop_dry_deciduous_(Bolivia)	34	Simira.rubescens	69.2392	169.755		Trop_dry_deciduous_(Bolivia)	34	Simira.rubescens	169.755
Trop_dry_deciduous_(Bolivia)	34	Simira.rubescens	70.0352	221.63		Trop_dry_deciduous_(Bolivia)	34	Simira.rubescens	221.63
Trop_dry_deciduous_(Bolivia)	34	Simira.rubescens	135.777	159.738		Trop_dry_deciduous_(Bolivia)	34	Simira.rubescens	159.738
Trop_dry_deciduous_(Bolivia)	34	Simira.rubescens	35.2937	162.27		Trop_dry_deciduous_(Bolivia)	34	Simira.rubescens	162.27
Trop_dry_deciduous_(Bolivia)	34	Simira.rubescens	50.7015	149.122		Trop_dry_deciduous_(Bolivia)	34	Simira.rubescens	149.122
Trop_dry_deciduous_(Bolivia)	34	Simira.rubescens	23.5295	177.581		Trop_dry_deciduous_(Bolivia)	34	Simira.rubescens	177.581
Trop_dry_deciduous_(Bolivia)	34	Simira.rubescens	52.224	157.065		Trop_dry_deciduous_(Bolivia)	34	Simira.rubescens	157.065
Trop_dry_deciduous_(Bolivia)	34	Solanum.riparium	59.2091	150.36		Trop_dry_deciduous_(Bolivia)	34	Solanum.riparium	150.36
Trop_dry_deciduous_(Bolivia)	34	Solanum.riparium	174.437	117.782		Trop_dry_deciduous_(Bolivia)	34	Solanum.riparium	117.782
Trop_dry_deciduous_(Bolivia)	34	Solanum.riparium	59.2091	134.417		Trop_dry_deciduous_(Bolivia)	34	Solanum.riparium	134.417
Trop_dry_deciduous_(Bolivia)	34	Solanum.riparium	116.597	189.8		Trop_dry_deciduous_(Bolivia)	34	Solanum.riparium	189.8
Trop_dry_deciduous_(Bolivia)	34	Solanum.riparium	67.5501	175.985		Trop_dry_deciduous_(Bolivia)	34	Solanum.riparium	175.985
Trop_dry_deciduous_(Bolivia)	34	Solanum.riparium	51.3767	262.126		Trop_dry_deciduous_(Bolivia)	34	Solanum.riparium	262.126
Trop_dry_deciduous_(Bolivia)	34	Solanum.riparium	256.882	251.845		Trop_dry_deciduous_(Bolivia)	34	Solanum.riparium	251.845
Trop_dry_deciduous_(Bolivia)	34	Solanum.riparium	80.1709	229.06		Trop_dry_deciduous_(Bolivia)	34	Solanum.riparium	229.06
Trop_dry_deciduous_(Bolivia)	34	Solanum.riparium	163.93	230.887		Trop_dry_deciduous_(Bolivia)	34	Solanum.riparium	230.887
Trop_dry_deciduous_(Bolivia)	34	Solanum.riparium	81.7656	227.127		Trop_dry_deciduous_(Bolivia)	34	Solanum.riparium	227.127
Trop_dry_deciduous_(Bolivia)	34	Spondias.mombin	35.1589	160.14		Trop_dry_deciduous_(Bolivia)	34	Spondias.mombin	160.14
Trop_dry_deciduous_(Bolivia)	34	Spondias.mombin	30.8367	159.338		Trop_dry_deciduous_(Bolivia)	34	Spondias.mombin	159.338
Trop_dry_deciduous_(Bolivia)	34	Spondias.mombin	20.3841	163.653		Trop_dry_deciduous_(Bolivia)	34	Spondias.mombin	163.653
Trop_dry_deciduous_(Bolivia)	34	Spondias.mombin	18.2505	189.798		Trop_dry_deciduous_(Bolivia)	34	Spondias.mombin	189.798
Trop_dry_deciduous_(Bolivia)	34	Spondias.mombin	18.777	215.018		Trop_dry_deciduous_(Bolivia)	34	Spondias.mombin	215.018
Trop_dry_deciduous_(Bolivia)	34	Spondias.mombin	19.1892	198.509		Trop_dry_deciduous_(Bolivia)	34	Spondias.mombin	198.509
Trop_dry_deciduous_(Bolivia)	34	Spondias.mombin	44.2092	238.969		Trop_dry_deciduous_(Bolivia)	34	Spondias.mombin	238.969
Trop_dry_deciduous_(Bolivia)	34	Spondias.mombin	37.8916	208.196		Trop_dry_deciduous_(Bolivia)	34	Spondias.mombin	208.196
Trop_dry_deciduous_(Bolivia)	34	Spondias.mombin	36.5637	232.151		Trop_dry_deciduous_(Bolivia)	34	Spondias.mombin	232.151
Trop_dry_deciduous_(Bolivia)	34	Spondias.mombin	38.756	195.409		Trop_dry_deciduous_(Bolivia)	34	Spondias.mombin	195.409
Trop_dry_deciduous_(Bolivia)	34	Sweetia.fruticosa	5.02401	136.715		Trop_dry_deciduous_(Bolivia)	34	Sweetia.fruticosa	136.715
Trop_dry_deciduous_(Bolivia)	34	Sweetia.fruticosa	3.60866	152.733		Trop_dry_deciduous_(Bolivia)	34	Sweetia.fruticosa	152.733
Trop_dry_deciduous_(Bolivia)	34	Sweetia.fruticosa	4.55795	147.537		Trop_dry_deciduous_(Bolivia)	34	Sweetia.fruticosa	147.537
Trop_dry_deciduous_(Bolivia)	34	Sweetia.fruticosa	6.08002	169.665		Trop_dry_deciduous_(Bolivia)	34	Sweetia.fruticosa	169.665
Trop_dry_deciduous_(Bolivia)	34	Sweetia.fruticosa	3.50681	210.005		Trop_dry_deciduous_(Bolivia)	34	Sweetia.fruticosa	210.005
Trop_dry_deciduous_(Bolivia)	34	Sweetia.fruticosa	4.83556	174.617		Trop_dry_deciduous_(Bolivia)	34	Sweetia.fruticosa	174.617
Trop_dry_deciduous_(Bolivia)	34	Sweetia.fruticosa	5.07451	177.608		Trop_dry_deciduous_(Bolivia)	34	Sweetia.fruticosa	177.608
Trop_dry_deciduous_(Bolivia)	34	Sweetia.fruticosa	10.4796	145.102		Trop_dry_deciduous_(Bolivia)	34	Sweetia.fruticosa	145.102
Trop_dry_deciduous_(Bolivia)	34	Sweetia.fruticosa	5.19786	191.5		Trop_dry_deciduous_(Bolivia)	34	Sweetia.fruticosa	191.5
Trop_dry_deciduous_(Bolivia)	34	Sweetia.fruticosa	5.82432	291.216		Trop_dry_deciduous_(Bolivia)	34	Sweetia.fruticosa	291.216
Trop_dry_deciduous_(Bolivia)	34	Trichilia.elegans	15.1111	138.947		Trop_dry_deciduous_(Bolivia)	34	Trichilia.elegans	138.947
Trop_dry_deciduous_(Bolivia)	34	Trichilia.elegans	14.0002	128.875		Trop_dry_deciduous_(Bolivia)	34	Trichilia.elegans	128.875
Trop_dry_deciduous_(Bolivia)	34	Trichilia.elegans	10.5918	161.213		Trop_dry_deciduous_(Bolivia)	34	Trichilia.elegans	161.213
Trop_dry_deciduous_(Bolivia)	34	Trichilia.elegans	6.9177	208.158		Trop_dry_deciduous_(Bolivia)	34	Trichilia.elegans	208.158
Trop_dry_deciduous_(Bolivia)	34	Trichilia.elegans	14.7379	176.495		Trop_dry_deciduous_(Bolivia)	34	Trichilia.elegans	176.495
Trop_dry_deciduous_(Bolivia)	34	Trichilia.elegans	9.86453	204.736		Trop_dry_deciduous_(Bolivia)	34	Trichilia.elegans	204.736
Trop_dry_deciduous_(Bolivia)	34	Trichilia.elegans	22.9641	205.036		Trop_dry_deciduous_(Bolivia)	34	Trichilia.elegans	205.036
Trop_dry_deciduous_(Bolivia)	34	Trichilia.elegans	14.8885	165.428		Trop_dry_deciduous_(Bolivia)	34	Trichilia.elegans	165.428
Trop_dry_deciduous_(Bolivia)	34	Trichilia.elegans	16.1534	152.802		Trop_dry_deciduous_(Bolivia)	34	Trichilia.elegans	152.802
Trop_dry_deciduous_(Bolivia)	34	Trichilia.elegans	25.7544	183.96		Trop_dry_deciduous_(Bolivia)	34	Trichilia.elegans	183.96
Trop_dry_deciduous_(Bolivia)	34	Zanthoxylum.monogynum...................	8.74715	224.517		Trop_dry_deciduous_(Bolivia)	34	Zanthoxylum.monogynum...................	224.517
Trop_dry_deciduous_(Bolivia)	34	Zanthoxylum.monogynum...................	12.5316	267.83		Trop_dry_deciduous_(Bolivia)	34	Zanthoxylum.monogynum...................	267.83
Trop_dry_deciduous_(Bolivia)	34	Zanthoxylum.monogynum...................	8.3949	202.61		Trop_dry_deciduous_(Bolivia)	34	Zanthoxylum.monogynum...................	202.61
Trop_dry_deciduous_(Bolivia)	34	Zanthoxylum.monogynum...................	11.4584	234.428		Trop_dry_deciduous_(Bolivia)	34	Zanthoxylum.monogynum...................	234.428
Trop_dry_deciduous_(Bolivia)	34	Zanthoxylum.monogynum...................	11.6549	237.078		Trop_dry_deciduous_(Bolivia)	34	Zanthoxylum.monogynum...................	237.078
Trop_dry_deciduous_(Bolivia)	34	Zanthoxylum.monogynum...................	15.0315	193.954		Trop_dry_deciduous_(Bolivia)	34	Zanthoxylum.monogynum...................	193.954
Trop_dry_deciduous_(Bolivia)	34	Zanthoxylum.monogynum...................	27.5798	196.998		Trop_dry_deciduous_(Bolivia)	34	Zanthoxylum.monogynum...................	196.998
Trop_dry_deciduous_(Bolivia)	34	Zanthoxylum.monogynum...................	16.142	166.986		Trop_dry_deciduous_(Bolivia)	34	Zanthoxylum.monogynum...................	166.986
Trop_dry_deciduous_(Bolivia)	34	Zanthoxylum.monogynum...................	16.2977	148.161		Trop_dry_deciduous_(Bolivia)	34	Zanthoxylum.monogynum...................	148.161
Trop_dry_deciduous_(Bolivia)	34	Zanthoxylum.monogynum...................	23.7152	128.887		Trop_dry_deciduous_(Bolivia)	34	Zanthoxylum.monogynum...................	128.887
Riparian_chaparral_evergreen_(California)	54	Acer_negundo_var._californicum	26.4064	NA		Riparian_chaparral_evergreen_(California)	54	Adenostoma_fasciculatum	50.7659
Riparian_chaparral_evergreen_(California)	54	Acer_negundo_var._californicum	14.9133	NA		Riparian_chaparral_evergreen_(California)	54	Adenostoma_fasciculatum	65.0241
Riparian_chaparral_evergreen_(California)	54	Acer_negundo_var._californicum	17.0017	NA		Riparian_chaparral_evergreen_(California)	54	Adenostoma_fasciculatum	52.674
Riparian_chaparral_evergreen_(California)	54	Acer_negundo_var._californicum	10.145	NA		Riparian_chaparral_evergreen_(California)	54	Adenostoma_fasciculatum	51.8318
Riparian_chaparral_evergreen_(California)	54	Acer_negundo_var._californicum	20.8547	NA		Riparian_chaparral_evergreen_(California)	54	Adenostoma_fasciculatum	53.5954
Riparian_chaparral_evergreen_(California)	54	Acer_negundo_var._californicum	29.265	NA		Riparian_chaparral_evergreen_(California)	54	Adenostoma_fasciculatum	63.0494
Riparian_chaparral_evergreen_(California)	54	Acer_negundo_var._californicum	22.5167	NA		Riparian_chaparral_evergreen_(California)	54	Adenostoma_fasciculatum	54.8724
Riparian_chaparral_evergreen_(California)	54	Acer_negundo_var._californicum	20.3658	NA		Riparian_chaparral_evergreen_(California)	54	Adenostoma_fasciculatum	52.6805
Riparian_chaparral_evergreen_(California)	54	Acer_negundo_var._californicum	22.9778	NA		Riparian_chaparral_evergreen_(California)	54	Adenostoma_fasciculatum	52.0131
Riparian_chaparral_evergreen_(California)	54	Acer_negundo_var._californicum	17.1827	NA		Riparian_chaparral_evergreen_(California)	54	Adenostoma_fasciculatum	53.917
Riparian_chaparral_evergreen_(California)	54	Acer_negundo_var._californicum	25.66	NA		Riparian_chaparral_evergreen_(California)	54	Adenostoma_fasciculatum	86.0213
Riparian_chaparral_evergreen_(California)	54	Acer_negundo_var._californicum	15.98	NA		Riparian_chaparral_evergreen_(California)	54	Adenostoma_fasciculatum	56.9164
Riparian_chaparral_evergreen_(California)	54	Acer_negundo_var._californicum	15.4658	NA		Riparian_chaparral_evergreen_(California)	54	Adenostoma_fasciculatum	54.387
Riparian_chaparral_evergreen_(California)	54	Acer_negundo_var._californicum	21.4283	NA		Riparian_chaparral_evergreen_(California)	54	Adenostoma_fasciculatum	64.052
Riparian_chaparral_evergreen_(California)	54	Adenostoma_fasciculatum	0.0591944	50.7659		Riparian_chaparral_evergreen_(California)	54	Adenostoma_fasciculatum	51.2096
Riparian_chaparral_evergreen_(California)	54	Adenostoma_fasciculatum	0.0598321	65.0241		Riparian_chaparral_evergreen_(California)	54	Adenostoma_fasciculatum	64.6904
Riparian_chaparral_evergreen_(California)	54	Adenostoma_fasciculatum	0.0607368	52.674		Riparian_chaparral_evergreen_(California)	54	Adenostoma_fasciculatum	52.9289
Riparian_chaparral_evergreen_(California)	54	Adenostoma_fasciculatum	0.0570267	51.8318		Riparian_chaparral_evergreen_(California)	54	Artemisia_californica	99.0171
Riparian_chaparral_evergreen_(California)	54	Adenostoma_fasciculatum	0.0501466	53.5954		Riparian_chaparral_evergreen_(California)	54	Artemisia_californica	112.784
Riparian_chaparral_evergreen_(California)	54	Adenostoma_fasciculatum	0.0816929	63.0494		Riparian_chaparral_evergreen_(California)	54	Artemisia_californica	155.191
Riparian_chaparral_evergreen_(California)	54	Adenostoma_fasciculatum	0.0920026	54.8724		Riparian_chaparral_evergreen_(California)	54	Artemisia_californica	134.677
Riparian_chaparral_evergreen_(California)	54	Adenostoma_fasciculatum	0.0403321	52.6805		Riparian_chaparral_evergreen_(California)	54	Artemisia_californica	108.464
Riparian_chaparral_evergreen_(California)	54	Adenostoma_fasciculatum	0.0669127	52.0131		Riparian_chaparral_evergreen_(California)	54	Artemisia_californica	102.377
Riparian_chaparral_evergreen_(California)	54	Adenostoma_fasciculatum	0.0585268	53.917		Riparian_chaparral_evergreen_(California)	54	Artemisia_californica	119.366
Riparian_chaparral_evergreen_(California)	54	Adenostoma_fasciculatum	0.0750702	86.0213		Riparian_chaparral_evergreen_(California)	54	Artemisia_californica	65.2896
Riparian_chaparral_evergreen_(California)	54	Adenostoma_fasciculatum	0.0649382	56.9164		Riparian_chaparral_evergreen_(California)	54	Artemisia_californica	79.6887
Riparian_chaparral_evergreen_(California)	54	Adenostoma_fasciculatum	0.0441361	54.387		Riparian_chaparral_evergreen_(California)	54	Artemisia_californica	111.34
Riparian_chaparral_evergreen_(California)	54	Adenostoma_fasciculatum	0.0506323	64.052		Riparian_chaparral_evergreen_(California)	54	Artemisia_californica	107.996
Riparian_chaparral_evergreen_(California)	54	Adenostoma_fasciculatum	0.0611207	51.2096		Riparian_chaparral_evergreen_(California)	54	Artemisia_californica	90.5258
Riparian_chaparral_evergreen_(California)	54	Adenostoma_fasciculatum	0.0489173	64.6904		Riparian_chaparral_evergreen_(California)	54	Artemisia_californica	124.099
Riparian_chaparral_evergreen_(California)	54	Adenostoma_fasciculatum	0.09635	52.9289		Riparian_chaparral_evergreen_(California)	54	Artemisia_californica	128.172
Riparian_chaparral_evergreen_(California)	54	Aesculus_californica	31.2768	NA		Riparian_chaparral_evergreen_(California)	54	Artemisia_californica	102.479
Riparian_chaparral_evergreen_(California)	54	Aesculus_californica	21.9668	NA		Riparian_chaparral_evergreen_(California)	54	Baccharis_pilularis	81.767
Riparian_chaparral_evergreen_(California)	54	Aesculus_californica	26.0905	NA		Riparian_chaparral_evergreen_(California)	54	Baccharis_pilularis	93.1454
Riparian_chaparral_evergreen_(California)	54	Aesculus_californica	21.7373	NA		Riparian_chaparral_evergreen_(California)	54	Baccharis_pilularis	94.3544
Riparian_chaparral_evergreen_(California)	54	Aesculus_californica	8.7995	NA		Riparian_chaparral_evergreen_(California)	54	Baccharis_pilularis	95.7074
Riparian_chaparral_evergreen_(California)	54	Aesculus_californica	7.5224	NA		Riparian_chaparral_evergreen_(California)	54	Baccharis_pilularis	74.5078
Riparian_chaparral_evergreen_(California)	54	Aesculus_californica	5.38612	NA		Riparian_chaparral_evergreen_(California)	54	Baccharis_pilularis	172.834
Riparian_chaparral_evergreen_(California)	54	Aesculus_californica	8.5845	NA		Riparian_chaparral_evergreen_(California)	54	Baccharis_pilularis	190.026
Riparian_chaparral_evergreen_(California)	54	Aesculus_californica	24.5443	NA		Riparian_chaparral_evergreen_(California)	54	Baccharis_pilularis	132.09
Riparian_chaparral_evergreen_(California)	54	Aesculus_californica	17.454	NA		Riparian_chaparral_evergreen_(California)	54	Baccharis_pilularis	81.8886
Riparian_chaparral_evergreen_(California)	54	Aesculus_californica	24.1862	NA		Riparian_chaparral_evergreen_(California)	54	Baccharis_pilularis	142.484
Riparian_chaparral_evergreen_(California)	54	Aesculus_californica	23.91	NA		Riparian_chaparral_evergreen_(California)	54	Baccharis_pilularis	129.935
Riparian_chaparral_evergreen_(California)	54	Aesculus_californica	22.814	NA		Riparian_chaparral_evergreen_(California)	54	Baccharis_pilularis	83.3373
Riparian_chaparral_evergreen_(California)	54	Aesculus_californica	28.4103	NA		Riparian_chaparral_evergreen_(California)	54	Baccharis_pilularis	117.006
Riparian_chaparral_evergreen_(California)	54	Artemisia_californica	0.582364	99.0171		Riparian_chaparral_evergreen_(California)	54	Baccharis_pilularis	86.7978
Riparian_chaparral_evergreen_(California)	54	Artemisia_californica	0.499433	112.784		Riparian_chaparral_evergreen_(California)	54	Baccharis_pilularis	240.575
Riparian_chaparral_evergreen_(California)	54	Artemisia_californica	0.118849	155.191		Riparian_chaparral_evergreen_(California)	54	Baccharis_pilularis	204.56
Riparian_chaparral_evergreen_(California)	54	Artemisia_californica	0.0990108	134.677		Riparian_chaparral_evergreen_(California)	54	Baccharis_pilularis	124.093
Riparian_chaparral_evergreen_(California)	54	Artemisia_californica	0.0850308	108.464		Riparian_chaparral_evergreen_(California)	54	Baccharis_pilularis	149.719
Riparian_chaparral_evergreen_(California)	54	Artemisia_californica	0.22659	102.377		Riparian_chaparral_evergreen_(California)	54	Baccharis_pilularis	133.581
Riparian_chaparral_evergreen_(California)	54	Artemisia_californica	0.108105	119.366		Riparian_chaparral_evergreen_(California)	54	Baccharis_pilularis	176.057
Riparian_chaparral_evergreen_(California)	54	Artemisia_californica	0.108953	65.2896		Riparian_chaparral_evergreen_(California)	54	Baccharis_pilularis	143.23
Riparian_chaparral_evergreen_(California)	54	Artemisia_californica	0.150364	79.6887		Riparian_chaparral_evergreen_(California)	54	Baccharis_pilularis	113.252
Riparian_chaparral_evergreen_(California)	54	Artemisia_californica	0.192708	111.34		Riparian_chaparral_evergreen_(California)	54	Baccharis_pilularis	97.106
Riparian_chaparral_evergreen_(California)	54	Artemisia_californica	0.166971	107.996		Riparian_chaparral_evergreen_(California)	54	Baccharis_pilularis	84.332
Riparian_chaparral_evergreen_(California)	54	Artemisia_californica	0.322554	90.5258		Riparian_chaparral_evergreen_(California)	54	Baccharis_pilularis	163.385
Riparian_chaparral_evergreen_(California)	54	Artemisia_californica	0.274656	124.099		Riparian_chaparral_evergreen_(California)	54	Baccharis_pilularis	78.1917
Riparian_chaparral_evergreen_(California)	54	Artemisia_californica	0.434423	128.172		Riparian_chaparral_evergreen_(California)	54	Baccharis_pilularis	82.1538
Riparian_chaparral_evergreen_(California)	54	Artemisia_californica	0.350247	102.479		Riparian_chaparral_evergreen_(California)	54	Baccharis_pilularis	90.8395
Riparian_chaparral_evergreen_(California)	54	Baccharis_pilularis	2.56309	81.767		Riparian_chaparral_evergreen_(California)	54	Baccharis_pilularis	90.0414
Riparian_chaparral_evergreen_(California)	54	Baccharis_pilularis	2.0198	93.1454		Riparian_chaparral_evergreen_(California)	54	Baccharis_pilularis	207.485
Riparian_chaparral_evergreen_(California)	54	Baccharis_pilularis	1.95029	94.3544		Riparian_chaparral_evergreen_(California)	54	Baccharis_pilularis	146.83
Riparian_chaparral_evergreen_(California)	54	Baccharis_pilularis	1.18836	95.7074		Riparian_chaparral_evergreen_(California)	54	Baccharis_pilularis	NA
Riparian_chaparral_evergreen_(California)	54	Baccharis_pilularis	0.866895	74.5078		Riparian_chaparral_evergreen_(California)	54	Ceanothus_cuneatus_var._cuneatus	51.5989
Riparian_chaparral_evergreen_(California)	54	Baccharis_pilularis	0.747	172.834		Riparian_chaparral_evergreen_(California)	54	Ceanothus_cuneatus_var._cuneatus	40.9421
Riparian_chaparral_evergreen_(California)	54	Baccharis_pilularis	0.874687	190.026		Riparian_chaparral_evergreen_(California)	54	Ceanothus_cuneatus_var._cuneatus	57.2114
Riparian_chaparral_evergreen_(California)	54	Baccharis_pilularis	1.4045	132.09		Riparian_chaparral_evergreen_(California)	54	Ceanothus_cuneatus_var._cuneatus	55.8669
Riparian_chaparral_evergreen_(California)	54	Baccharis_pilularis	1.01193	81.8886		Riparian_chaparral_evergreen_(California)	54	Ceanothus_cuneatus_var._cuneatus	39.4258
Riparian_chaparral_evergreen_(California)	54	Baccharis_pilularis	1.679	142.484		Riparian_chaparral_evergreen_(California)	54	Ceanothus_cuneatus_var._cuneatus	37.5899
Riparian_chaparral_evergreen_(California)	54	Baccharis_pilularis	4.11083	129.935		Riparian_chaparral_evergreen_(California)	54	Ceanothus_cuneatus_var._cuneatus	37.5198
Riparian_chaparral_evergreen_(California)	54	Baccharis_pilularis	0.64084	83.3373		Riparian_chaparral_evergreen_(California)	54	Ceanothus_cuneatus_var._cuneatus	40.6564
Riparian_chaparral_evergreen_(California)	54	Baccharis_pilularis	1.29518	117.006		Riparian_chaparral_evergreen_(California)	54	Ceanothus_cuneatus_var._cuneatus	41.6354
Riparian_chaparral_evergreen_(California)	54	Baccharis_pilularis	1.30865	86.7978		Riparian_chaparral_evergreen_(California)	54	Ceanothus_cuneatus_var._cuneatus	44.6679
Riparian_chaparral_evergreen_(California)	54	Baccharis_pilularis	1.16183	240.575		Riparian_chaparral_evergreen_(California)	54	Ceanothus_cuneatus_var._cuneatus	37.8489
Riparian_chaparral_evergreen_(California)	54	Baccharis_pilularis	0.74835	204.56		Riparian_chaparral_evergreen_(California)	54	Ceanothus_cuneatus_var._cuneatus	40.1422
Riparian_chaparral_evergreen_(California)	54	Baccharis_pilularis	0.753	124.093		Riparian_chaparral_evergreen_(California)	54	Ceanothus_cuneatus_var._cuneatus	47.272
Riparian_chaparral_evergreen_(California)	54	Baccharis_pilularis	1.71807	149.719		Riparian_chaparral_evergreen_(California)	54	Ceanothus_cuneatus_var._cuneatus	40.9179
Riparian_chaparral_evergreen_(California)	54	Baccharis_pilularis	1.52212	133.581		Riparian_chaparral_evergreen_(California)	54	Ceanothus_cuneatus_var._cuneatus	45.7926
Riparian_chaparral_evergreen_(California)	54	Baccharis_pilularis	1.8112	176.057		Riparian_chaparral_evergreen_(California)	54	Ceanothus_cuneatus_var._cuneatus	51.3628
Riparian_chaparral_evergreen_(California)	54	Baccharis_pilularis	1.84318	143.23		Riparian_chaparral_evergreen_(California)	54	Ceanothus_cuneatus_var._cuneatus	44.644
Riparian_chaparral_evergreen_(California)	54	Baccharis_pilularis	1.14438	113.252		Riparian_chaparral_evergreen_(California)	54	Ceanothus_cuneatus_var._cuneatus	36.4891
Riparian_chaparral_evergreen_(California)	54	Baccharis_pilularis	0.993529	97.106		Riparian_chaparral_evergreen_(California)	54	Cercocarpus_betuloides_var._betuloides	55.8791
Riparian_chaparral_evergreen_(California)	54	Baccharis_pilularis	1.34183	84.332		Riparian_chaparral_evergreen_(California)	54	Cercocarpus_betuloides_var._betuloides	73.3684
Riparian_chaparral_evergreen_(California)	54	Baccharis_pilularis	1.2192	163.385		Riparian_chaparral_evergreen_(California)	54	Cercocarpus_betuloides_var._betuloides	65.7638
Riparian_chaparral_evergreen_(California)	54	Baccharis_pilularis	0.978471	78.1917		Riparian_chaparral_evergreen_(California)	54	Cercocarpus_betuloides_var._betuloides	64.9904
Riparian_chaparral_evergreen_(California)	54	Baccharis_pilularis	1.05964	82.1538		Riparian_chaparral_evergreen_(California)	54	Cercocarpus_betuloides_var._betuloides	89.4197
Riparian_chaparral_evergreen_(California)	54	Baccharis_pilularis	2.18433	90.8395		Riparian_chaparral_evergreen_(California)	54	Cercocarpus_betuloides_var._betuloides	76.2023
Riparian_chaparral_evergreen_(California)	54	Baccharis_pilularis	1.83906	90.0414		Riparian_chaparral_evergreen_(California)	54	Cercocarpus_betuloides_var._betuloides	69.5992
Riparian_chaparral_evergreen_(California)	54	Baccharis_pilularis	1.9869	207.485		Riparian_chaparral_evergreen_(California)	54	Cercocarpus_betuloides_var._betuloides	81.3839
Riparian_chaparral_evergreen_(California)	54	Baccharis_pilularis	2.137	146.83		Riparian_chaparral_evergreen_(California)	54	Cercocarpus_betuloides_var._betuloides	59.8054
Riparian_chaparral_evergreen_(California)	54	Baccharis_pilularis	1.43867	NA		Riparian_chaparral_evergreen_(California)	54	Cercocarpus_betuloides_var._betuloides	68.8327
Riparian_chaparral_evergreen_(California)	54	Ceanothus_cuneatus_var._cuneatus	0.37149	51.5989		Riparian_chaparral_evergreen_(California)	54	Dirca_occidentalis	216.841
Riparian_chaparral_evergreen_(California)	54	Ceanothus_cuneatus_var._cuneatus	0.527682	40.9421		Riparian_chaparral_evergreen_(California)	54	Dirca_occidentalis	373.674
Riparian_chaparral_evergreen_(California)	54	Ceanothus_cuneatus_var._cuneatus	0.452436	57.2114		Riparian_chaparral_evergreen_(California)	54	Dirca_occidentalis	355.542
Riparian_chaparral_evergreen_(California)	54	Ceanothus_cuneatus_var._cuneatus	0.74368	55.8669		Riparian_chaparral_evergreen_(California)	54	Dirca_occidentalis	215.428
Riparian_chaparral_evergreen_(California)	54	Ceanothus_cuneatus_var._cuneatus	1.33342	39.4258		Riparian_chaparral_evergreen_(California)	54	Dirca_occidentalis	160.527
Riparian_chaparral_evergreen_(California)	54	Ceanothus_cuneatus_var._cuneatus	0.94428	37.5899		Riparian_chaparral_evergreen_(California)	54	Dirca_occidentalis	255.944
Riparian_chaparral_evergreen_(California)	54	Ceanothus_cuneatus_var._cuneatus	1.91057	37.5198		Riparian_chaparral_evergreen_(California)	54	Dirca_occidentalis	214.401
Riparian_chaparral_evergreen_(California)	54	Ceanothus_cuneatus_var._cuneatus	0.846706	40.6564		Riparian_chaparral_evergreen_(California)	54	Dirca_occidentalis	187.719
Riparian_chaparral_evergreen_(California)	54	Ceanothus_cuneatus_var._cuneatus	1.05555	41.6354		Riparian_chaparral_evergreen_(California)	54	Dirca_occidentalis	242.648
Riparian_chaparral_evergreen_(California)	54	Ceanothus_cuneatus_var._cuneatus	0.945667	44.6679		Riparian_chaparral_evergreen_(California)	54	Dirca_occidentalis	287.704
Riparian_chaparral_evergreen_(California)	54	Ceanothus_cuneatus_var._cuneatus	0.607646	37.8489		Riparian_chaparral_evergreen_(California)	54	Dirca_occidentalis	188.97
Riparian_chaparral_evergreen_(California)	54	Ceanothus_cuneatus_var._cuneatus	0.710854	40.1422		Riparian_chaparral_evergreen_(California)	54	Dirca_occidentalis	191.133
Riparian_chaparral_evergreen_(California)	54	Ceanothus_cuneatus_var._cuneatus	0.848442	47.272		Riparian_chaparral_evergreen_(California)	54	Dirca_occidentalis	177.625
Riparian_chaparral_evergreen_(California)	54	Ceanothus_cuneatus_var._cuneatus	1.56425	40.9179		Riparian_chaparral_evergreen_(California)	54	Dirca_occidentalis	163.763
Riparian_chaparral_evergreen_(California)	54	Ceanothus_cuneatus_var._cuneatus	0.800111	45.7926		Riparian_chaparral_evergreen_(California)	54	Dirca_occidentalis	208.257
Riparian_chaparral_evergreen_(California)	54	Ceanothus_cuneatus_var._cuneatus	1.06399	51.3628		Riparian_chaparral_evergreen_(California)	54	Dirca_occidentalis	318.727
Riparian_chaparral_evergreen_(California)	54	Ceanothus_cuneatus_var._cuneatus	0.815438	44.644		Riparian_chaparral_evergreen_(California)	54	Dirca_occidentalis	231.564
Riparian_chaparral_evergreen_(California)	54	Ceanothus_cuneatus_var._cuneatus	0.80165	36.4891		Riparian_chaparral_evergreen_(California)	54	Dirca_occidentalis	277.627
Riparian_chaparral_evergreen_(California)	54	Cercocarpus_betuloides_var._betuloides	1.2047	55.8791		Riparian_chaparral_evergreen_(California)	54	Dirca_occidentalis	182.649
Riparian_chaparral_evergreen_(California)	54	Cercocarpus_betuloides_var._betuloides	1.49875	73.3684		Riparian_chaparral_evergreen_(California)	54	Heteromeles_arbutifolia	55.5868
Riparian_chaparral_evergreen_(California)	54	Cercocarpus_betuloides_var._betuloides	0.9955	65.7638		Riparian_chaparral_evergreen_(California)	54	Heteromeles_arbutifolia	46.1562
Riparian_chaparral_evergreen_(California)	54	Cercocarpus_betuloides_var._betuloides	1.127	64.9904		Riparian_chaparral_evergreen_(California)	54	Heteromeles_arbutifolia	56.8269
Riparian_chaparral_evergreen_(California)	54	Cercocarpus_betuloides_var._betuloides	1.7658	89.4197		Riparian_chaparral_evergreen_(California)	54	Heteromeles_arbutifolia	45.2833
Riparian_chaparral_evergreen_(California)	54	Cercocarpus_betuloides_var._betuloides	1.15938	76.2023		Riparian_chaparral_evergreen_(California)	54	Heteromeles_arbutifolia	51.6529
Riparian_chaparral_evergreen_(California)	54	Cercocarpus_betuloides_var._betuloides	1.62953	69.5992		Riparian_chaparral_evergreen_(California)	54	Heteromeles_arbutifolia	47.9252
Riparian_chaparral_evergreen_(California)	54	Cercocarpus_betuloides_var._betuloides	1.78425	81.3839		Riparian_chaparral_evergreen_(California)	54	Heteromeles_arbutifolia	56.1727
Riparian_chaparral_evergreen_(California)	54	Cercocarpus_betuloides_var._betuloides	1.3095	59.8054		Riparian_chaparral_evergreen_(California)	54	Heteromeles_arbutifolia	46.7558
Riparian_chaparral_evergreen_(California)	54	Cercocarpus_betuloides_var._betuloides	1.6703	68.8327		Riparian_chaparral_evergreen_(California)	54	Heteromeles_arbutifolia	75.0795
Riparian_chaparral_evergreen_(California)	54	Clematis_lasiantha	3.38238	NA		Riparian_chaparral_evergreen_(California)	54	Heteromeles_arbutifolia	79.3728
Riparian_chaparral_evergreen_(California)	54	Clematis_lasiantha	3.62653	NA		Riparian_chaparral_evergreen_(California)	54	Heteromeles_arbutifolia	64.8777
Riparian_chaparral_evergreen_(California)	54	Clematis_lasiantha	6.82383	NA		Riparian_chaparral_evergreen_(California)	54	Heteromeles_arbutifolia	50.5152
Riparian_chaparral_evergreen_(California)	54	Clematis_lasiantha	17.565	NA		Riparian_chaparral_evergreen_(California)	54	Heteromeles_arbutifolia	91.9241
Riparian_chaparral_evergreen_(California)	54	Clematis_lasiantha	6.6007	NA		Riparian_chaparral_evergreen_(California)	54	Heteromeles_arbutifolia	99.1788
Riparian_chaparral_evergreen_(California)	54	Clematis_lasiantha	6.36878	NA		Riparian_chaparral_evergreen_(California)	54	Heteromeles_arbutifolia	84.7579
Riparian_chaparral_evergreen_(California)	54	Clematis_lasiantha	3.76639	NA		Riparian_chaparral_evergreen_(California)	54	Heteromeles_arbutifolia	46.9825
Riparian_chaparral_evergreen_(California)	54	Clematis_lasiantha	5.49433	NA		Riparian_chaparral_evergreen_(California)	54	Heteromeles_arbutifolia	48.0282
Riparian_chaparral_evergreen_(California)	54	Clematis_lasiantha	3.819	NA		Riparian_chaparral_evergreen_(California)	54	Heteromeles_arbutifolia	81.0476
Riparian_chaparral_evergreen_(California)	54	Clematis_lasiantha	5.05773	NA		Riparian_chaparral_evergreen_(California)	54	Heteromeles_arbutifolia	50.1583
Riparian_chaparral_evergreen_(California)	54	Cotoneaster_pannosa	1.5084	74.3102		Riparian_chaparral_evergreen_(California)	54	Heteromeles_arbutifolia	64.2067
Riparian_chaparral_evergreen_(California)	54	Cotoneaster_pannosa	1.26243	71.3857		Riparian_chaparral_evergreen_(California)	54	Heteromeles_arbutifolia	66.9263
Riparian_chaparral_evergreen_(California)	54	Cotoneaster_pannosa	1.74975	97.8705		Riparian_chaparral_evergreen_(California)	54	Heteromeles_arbutifolia	57.8569
Riparian_chaparral_evergreen_(California)	54	Cotoneaster_pannosa	1.12271	148.769		Riparian_chaparral_evergreen_(California)	54	Heteromeles_arbutifolia	54.0391
Riparian_chaparral_evergreen_(California)	54	Cotoneaster_pannosa	1.42422	124.676		Riparian_chaparral_evergreen_(California)	54	Heteromeles_arbutifolia	61.1756
Riparian_chaparral_evergreen_(California)	54	Cotoneaster_pannosa	0.810933	114.916		Riparian_chaparral_evergreen_(California)	54	Heteromeles_arbutifolia	87.0609
Riparian_chaparral_evergreen_(California)	54	Cotoneaster_pannosa	1.071	154.333		Riparian_chaparral_evergreen_(California)	54	Heteromeles_arbutifolia	57.7148
Riparian_chaparral_evergreen_(California)	54	Cotoneaster_pannosa	0.61835	NA		Riparian_chaparral_evergreen_(California)	54	Heteromeles_arbutifolia	44.4737
Riparian_chaparral_evergreen_(California)	54	Cotoneaster_pannosa	0.998071	NA		Riparian_chaparral_evergreen_(California)	54	Heteromeles_arbutifolia	66.8373
Riparian_chaparral_evergreen_(California)	54	Cotoneaster_pannosa	1.00107	NA		Riparian_chaparral_evergreen_(California)	54	Heteromeles_arbutifolia	42.3088
Riparian_chaparral_evergreen_(California)	54	Dirca_occidentalis	16.6032	216.841		Riparian_chaparral_evergreen_(California)	54	Heteromeles_arbutifolia	NA
Riparian_chaparral_evergreen_(California)	54	Dirca_occidentalis	17.0436	373.674		Riparian_chaparral_evergreen_(California)	54	Heteromeles_arbutifolia	NA
Riparian_chaparral_evergreen_(California)	54	Dirca_occidentalis	22.805	355.542		Riparian_chaparral_evergreen_(California)	54	Heteromeles_arbutifolia	NA
Riparian_chaparral_evergreen_(California)	54	Dirca_occidentalis	20.4943	215.428		Riparian_chaparral_evergreen_(California)	54	Heteromeles_arbutifolia	NA
Riparian_chaparral_evergreen_(California)	54	Dirca_occidentalis	5.7008	160.527		Riparian_chaparral_evergreen_(California)	54	Lepechinia_calycina	156.949
Riparian_chaparral_evergreen_(California)	54	Dirca_occidentalis	6.0405	255.944		Riparian_chaparral_evergreen_(California)	54	Lepechinia_calycina	111.731
Riparian_chaparral_evergreen_(California)	54	Dirca_occidentalis	6.9044	214.401		Riparian_chaparral_evergreen_(California)	54	Lepechinia_calycina	128.449
Riparian_chaparral_evergreen_(California)	54	Dirca_occidentalis	6.725	187.719		Riparian_chaparral_evergreen_(California)	54	Lepechinia_calycina	176.501
Riparian_chaparral_evergreen_(California)	54	Dirca_occidentalis	9.78483	242.648		Riparian_chaparral_evergreen_(California)	54	Lepechinia_calycina	157.677
Riparian_chaparral_evergreen_(California)	54	Dirca_occidentalis	15.5015	287.704		Riparian_chaparral_evergreen_(California)	54	Lepechinia_calycina	118.976
Riparian_chaparral_evergreen_(California)	54	Dirca_occidentalis	12.1693	188.97		Riparian_chaparral_evergreen_(California)	54	Lepechinia_calycina	101.165
Riparian_chaparral_evergreen_(California)	54	Dirca_occidentalis	17.064	191.133		Riparian_chaparral_evergreen_(California)	54	Lepechinia_calycina	109.191
Riparian_chaparral_evergreen_(California)	54	Dirca_occidentalis	10.575	177.625		Riparian_chaparral_evergreen_(California)	54	Lepechinia_calycina	122.2
Riparian_chaparral_evergreen_(California)	54	Dirca_occidentalis	4.271	163.763		Riparian_chaparral_evergreen_(California)	54	Lepechinia_calycina	83.2811
Riparian_chaparral_evergreen_(California)	54	Dirca_occidentalis	4.736	208.257		Riparian_chaparral_evergreen_(California)	54	Lepechinia_calycina	123.364
Riparian_chaparral_evergreen_(California)	54	Dirca_occidentalis	12.9313	318.727		Riparian_chaparral_evergreen_(California)	54	Lepechinia_calycina	108.626
Riparian_chaparral_evergreen_(California)	54	Dirca_occidentalis	11.2435	231.564		Riparian_chaparral_evergreen_(California)	54	Lonicera_hispidula_var._vacillans	151.826
Riparian_chaparral_evergreen_(California)	54	Dirca_occidentalis	18.5244	277.627		Riparian_chaparral_evergreen_(California)	54	Lonicera_hispidula_var._vacillans	123.345
Riparian_chaparral_evergreen_(California)	54	Dirca_occidentalis	11.9423	182.649		Riparian_chaparral_evergreen_(California)	54	Lonicera_hispidula_var._vacillans	105.7
Riparian_chaparral_evergreen_(California)	54	Genista_monspessulana	1.25762	221.91		Riparian_chaparral_evergreen_(California)	54	Lonicera_hispidula_var._vacillans	97.5135
Riparian_chaparral_evergreen_(California)	54	Genista_monspessulana	1.56178	390.067		Riparian_chaparral_evergreen_(California)	54	Lonicera_hispidula_var._vacillans	152.272
Riparian_chaparral_evergreen_(California)	54	Genista_monspessulana	0.9716	462.165		Riparian_chaparral_evergreen_(California)	54	Lonicera_hispidula_var._vacillans	116.494
Riparian_chaparral_evergreen_(California)	54	Genista_monspessulana	0.757053	364.86		Riparian_chaparral_evergreen_(California)	54	Lonicera_hispidula_var._vacillans	121.584
Riparian_chaparral_evergreen_(California)	54	Genista_monspessulana	2.2845	499.392		Riparian_chaparral_evergreen_(California)	54	Lonicera_hispidula_var._vacillans	176.684
Riparian_chaparral_evergreen_(California)	54	Genista_monspessulana	0.463704	NA		Riparian_chaparral_evergreen_(California)	54	Lonicera_hispidula_var._vacillans	171.892
Riparian_chaparral_evergreen_(California)	54	Genista_monspessulana	0.499625	NA		Riparian_chaparral_evergreen_(California)	54	Lonicera_hispidula_var._vacillans	197.912
Riparian_chaparral_evergreen_(California)	54	Genista_monspessulana	1.04017	NA		Riparian_chaparral_evergreen_(California)	54	Lonicera_hispidula_var._vacillans	130.237
Riparian_chaparral_evergreen_(California)	54	Genista_monspessulana	0.463133	NA		Riparian_chaparral_evergreen_(California)	54	Lonicera_hispidula_var._vacillans	117.751
Riparian_chaparral_evergreen_(California)	54	Genista_monspessulana	0.22603	NA		Riparian_chaparral_evergreen_(California)	54	Lonicera_hispidula_var._vacillans	100.446
Riparian_chaparral_evergreen_(California)	54	Genista_monspessulana	0.213625	NA		Riparian_chaparral_evergreen_(California)	54	Lonicera_hispidula_var._vacillans	173.624
Riparian_chaparral_evergreen_(California)	54	Genista_monspessulana	0.824429	NA		Riparian_chaparral_evergreen_(California)	54	Lonicera_hispidula_var._vacillans	133.116
Riparian_chaparral_evergreen_(California)	54	Genista_monspessulana	0.98319	NA		Riparian_chaparral_evergreen_(California)	54	Lonicera_hispidula_var._vacillans	231.288
Riparian_chaparral_evergreen_(California)	54	Heteromeles_arbutifolia	22.358	55.5868		Riparian_chaparral_evergreen_(California)	54	Lonicera_hispidula_var._vacillans	116.37
Riparian_chaparral_evergreen_(California)	54	Heteromeles_arbutifolia	20.7662	46.1562		Riparian_chaparral_evergreen_(California)	54	Lonicera_hispidula_var._vacillans	221.393
Riparian_chaparral_evergreen_(California)	54	Heteromeles_arbutifolia	22.446	56.8269		Riparian_chaparral_evergreen_(California)	54	Lonicera_hispidula_var._vacillans	190.254
Riparian_chaparral_evergreen_(California)	54	Heteromeles_arbutifolia	25.782	45.2833		Riparian_chaparral_evergreen_(California)	54	Lonicera_hispidula_var._vacillans	162.399
Riparian_chaparral_evergreen_(California)	54	Heteromeles_arbutifolia	9.86725	51.6529		Riparian_chaparral_evergreen_(California)	54	Lonicera_hispidula_var._vacillans	159.04
Riparian_chaparral_evergreen_(California)	54	Heteromeles_arbutifolia	7.84075	47.9252		Riparian_chaparral_evergreen_(California)	54	Lonicera_hispidula_var._vacillans	236.901
Riparian_chaparral_evergreen_(California)	54	Heteromeles_arbutifolia	19.0783	56.1727		Riparian_chaparral_evergreen_(California)	54	Lonicera_hispidula_var._vacillans	121.992
Riparian_chaparral_evergreen_(California)	54	Heteromeles_arbutifolia	12.3329	46.7558		Riparian_chaparral_evergreen_(California)	54	Lonicera_hispidula_var._vacillans	116.951
Riparian_chaparral_evergreen_(California)	54	Heteromeles_arbutifolia	7.10343	75.0795		Riparian_chaparral_evergreen_(California)	54	Lonicera_hispidula_var._vacillans	173.57
Riparian_chaparral_evergreen_(California)	54	Heteromeles_arbutifolia	8.04271	79.3728		Riparian_chaparral_evergreen_(California)	54	Lonicera_hispidula_var._vacillans	118.204
Riparian_chaparral_evergreen_(California)	54	Heteromeles_arbutifolia	10.0055	64.8777		Riparian_chaparral_evergreen_(California)	54	Lonicera_hispidula_var._vacillans	83.3644
Riparian_chaparral_evergreen_(California)	54	Heteromeles_arbutifolia	7.41843	50.5152		Riparian_chaparral_evergreen_(California)	54	Lonicera_hispidula_var._vacillans	140.431
Riparian_chaparral_evergreen_(California)	54	Heteromeles_arbutifolia	19.98	91.9241		Riparian_chaparral_evergreen_(California)	54	Lonicera_hispidula_var._vacillans	156.557
Riparian_chaparral_evergreen_(California)	54	Heteromeles_arbutifolia	5.225	99.1788		Riparian_chaparral_evergreen_(California)	54	Lonicera_hispidula_var._vacillans	165.996
Riparian_chaparral_evergreen_(California)	54	Heteromeles_arbutifolia	11.1711	84.7579		Riparian_chaparral_evergreen_(California)	54	Lonicera_hispidula_var._vacillans	213.238
Riparian_chaparral_evergreen_(California)	54	Heteromeles_arbutifolia	4.879	46.9825		Riparian_chaparral_evergreen_(California)	54	Lonicera_hispidula_var._vacillans	264.398
Riparian_chaparral_evergreen_(California)	54	Heteromeles_arbutifolia	10.89	48.0282		Riparian_chaparral_evergreen_(California)	54	Lonicera_hispidula_var._vacillans	413.633
Riparian_chaparral_evergreen_(California)	54	Heteromeles_arbutifolia	5.73211	81.0476		Riparian_chaparral_evergreen_(California)	54	Lonicera_hispidula_var._vacillans	207.89
Riparian_chaparral_evergreen_(California)	54	Heteromeles_arbutifolia	14.7264	50.1583		Riparian_chaparral_evergreen_(California)	54	Lonicera_hispidula_var._vacillans	201.304
Riparian_chaparral_evergreen_(California)	54	Heteromeles_arbutifolia	7.815	64.2067		Riparian_chaparral_evergreen_(California)	54	Lonicera_hispidula_var._vacillans	105.89
Riparian_chaparral_evergreen_(California)	54	Heteromeles_arbutifolia	10.5183	66.9263		Riparian_chaparral_evergreen_(California)	54	Lonicera_hispidula_var._vacillans	104.341
Riparian_chaparral_evergreen_(California)	54	Heteromeles_arbutifolia	18.2523	57.8569		Riparian_chaparral_evergreen_(California)	54	Lonicera_hispidula_var._vacillans	265.234
Riparian_chaparral_evergreen_(California)	54	Heteromeles_arbutifolia	16.8017	54.0391		Riparian_chaparral_evergreen_(California)	54	Lonicera_hispidula_var._vacillans	NA
Riparian_chaparral_evergreen_(California)	54	Heteromeles_arbutifolia	12.0467	61.1756		Riparian_chaparral_evergreen_(California)	54	Lonicera_hispidula_var._vacillans	NA
Riparian_chaparral_evergreen_(California)	54	Heteromeles_arbutifolia	20.0153	87.0609		Riparian_chaparral_evergreen_(California)	54	Lonicera_hispidula_var._vacillans	NA
Riparian_chaparral_evergreen_(California)	54	Heteromeles_arbutifolia	13.38	57.7148		Riparian_chaparral_evergreen_(California)	54	Lonicera_hispidula_var._vacillans	NA
Riparian_chaparral_evergreen_(California)	54	Heteromeles_arbutifolia	8.9851	44.4737		Riparian_chaparral_evergreen_(California)	54	Mimulus_aurantiacus	94.3012
Riparian_chaparral_evergreen_(California)	54	Heteromeles_arbutifolia	18.2617	66.8373		Riparian_chaparral_evergreen_(California)	54	Mimulus_aurantiacus	68.8061
Riparian_chaparral_evergreen_(California)	54	Heteromeles_arbutifolia	15.2844	42.3088		Riparian_chaparral_evergreen_(California)	54	Mimulus_aurantiacus	104.666
Riparian_chaparral_evergreen_(California)	54	Heteromeles_arbutifolia	14.1862	NA		Riparian_chaparral_evergreen_(California)	54	Mimulus_aurantiacus	100.842
Riparian_chaparral_evergreen_(California)	54	Heteromeles_arbutifolia	23.8714	NA		Riparian_chaparral_evergreen_(California)	54	Mimulus_aurantiacus	97.763
Riparian_chaparral_evergreen_(California)	54	Heteromeles_arbutifolia	13.2376	NA		Riparian_chaparral_evergreen_(California)	54	Mimulus_aurantiacus	128.056
Riparian_chaparral_evergreen_(California)	54	Heteromeles_arbutifolia	22.8329	NA		Riparian_chaparral_evergreen_(California)	54	Mimulus_aurantiacus	41.5277
Riparian_chaparral_evergreen_(California)	54	Lepechinia_calycina	17.785	156.949		Riparian_chaparral_evergreen_(California)	54	Mimulus_aurantiacus	32.3001
Riparian_chaparral_evergreen_(California)	54	Lepechinia_calycina	41.99	111.731		Riparian_chaparral_evergreen_(California)	54	Mimulus_aurantiacus	47.4087
Riparian_chaparral_evergreen_(California)	54	Lepechinia_calycina	9.397	128.449		Riparian_chaparral_evergreen_(California)	54	Mimulus_aurantiacus	43.5607
Riparian_chaparral_evergreen_(California)	54	Lepechinia_calycina	2.35789	176.501		Riparian_chaparral_evergreen_(California)	54	Mimulus_aurantiacus	54.0084
Riparian_chaparral_evergreen_(California)	54	Lepechinia_calycina	9.00514	157.677		Riparian_chaparral_evergreen_(California)	54	Mimulus_aurantiacus	71.65
Riparian_chaparral_evergreen_(California)	54	Lepechinia_calycina	4.2965	118.976		Riparian_chaparral_evergreen_(California)	54	Mimulus_aurantiacus	44.9639
Riparian_chaparral_evergreen_(California)	54	Lepechinia_calycina	13.3545	101.165		Riparian_chaparral_evergreen_(California)	54	Mimulus_aurantiacus	122.167
Riparian_chaparral_evergreen_(California)	54	Lepechinia_calycina	8.15871	109.191		Riparian_chaparral_evergreen_(California)	54	Mimulus_aurantiacus	49.1663
Riparian_chaparral_evergreen_(California)	54	Lepechinia_calycina	16.4677	122.2		Riparian_chaparral_evergreen_(California)	54	Mimulus_aurantiacus	81.9846
Riparian_chaparral_evergreen_(California)	54	Lepechinia_calycina	11.0638	83.2811		Riparian_chaparral_evergreen_(California)	54	Mimulus_aurantiacus	57.9257
Riparian_chaparral_evergreen_(California)	54	Lepechinia_calycina	6.6361	123.364		Riparian_chaparral_evergreen_(California)	54	Mimulus_aurantiacus	73.5616
Riparian_chaparral_evergreen_(California)	54	Lepechinia_calycina	5.39775	108.626		Riparian_chaparral_evergreen_(California)	54	Mimulus_aurantiacus	157.855
Riparian_chaparral_evergreen_(California)	54	Lonicera_hispidula_var._vacillans	3.33325	151.826		Riparian_chaparral_evergreen_(California)	54	Mimulus_aurantiacus	41.0298
Riparian_chaparral_evergreen_(California)	54	Lonicera_hispidula_var._vacillans	2.459	123.345		Riparian_chaparral_evergreen_(California)	54	Mimulus_aurantiacus	73.0619
Riparian_chaparral_evergreen_(California)	54	Lonicera_hispidula_var._vacillans	5.62375	105.7		Riparian_chaparral_evergreen_(California)	54	Mimulus_aurantiacus	45.4836
Riparian_chaparral_evergreen_(California)	54	Lonicera_hispidula_var._vacillans	4.0885	97.5135		Riparian_chaparral_evergreen_(California)	54	Mimulus_aurantiacus	98.427
Riparian_chaparral_evergreen_(California)	54	Lonicera_hispidula_var._vacillans	22.7407	152.272		Riparian_chaparral_evergreen_(California)	54	Mimulus_aurantiacus	51.1119
Riparian_chaparral_evergreen_(California)	54	Lonicera_hispidula_var._vacillans	9.19737	116.494		Riparian_chaparral_evergreen_(California)	54	Prunus_ilicifolia_ssp._ilicifolia	67.758
Riparian_chaparral_evergreen_(California)	54	Lonicera_hispidula_var._vacillans	2.6675	121.584		Riparian_chaparral_evergreen_(California)	54	Prunus_ilicifolia_ssp._ilicifolia	99.5818
Riparian_chaparral_evergreen_(California)	54	Lonicera_hispidula_var._vacillans	6.35875	176.684		Riparian_chaparral_evergreen_(California)	54	Prunus_ilicifolia_ssp._ilicifolia	66.8165
Riparian_chaparral_evergreen_(California)	54	Lonicera_hispidula_var._vacillans	3.11167	171.892		Riparian_chaparral_evergreen_(California)	54	Prunus_ilicifolia_ssp._ilicifolia	87.1203
Riparian_chaparral_evergreen_(California)	54	Lonicera_hispidula_var._vacillans	2.72313	197.912		Riparian_chaparral_evergreen_(California)	54	Prunus_ilicifolia_ssp._ilicifolia	87.6542
Riparian_chaparral_evergreen_(California)	54	Lonicera_hispidula_var._vacillans	12.0117	130.237		Riparian_chaparral_evergreen_(California)	54	Prunus_ilicifolia_ssp._ilicifolia	59.0288
Riparian_chaparral_evergreen_(California)	54	Lonicera_hispidula_var._vacillans	7.9325	117.751		Riparian_chaparral_evergreen_(California)	54	Prunus_ilicifolia_ssp._ilicifolia	57.0569
Riparian_chaparral_evergreen_(California)	54	Lonicera_hispidula_var._vacillans	7.309	100.446		Riparian_chaparral_evergreen_(California)	54	Prunus_ilicifolia_ssp._ilicifolia	86.475
Riparian_chaparral_evergreen_(California)	54	Lonicera_hispidula_var._vacillans	12.6282	173.624		Riparian_chaparral_evergreen_(California)	54	Prunus_ilicifolia_ssp._ilicifolia	53.3176
Riparian_chaparral_evergreen_(California)	54	Lonicera_hispidula_var._vacillans	13.243	133.116		Riparian_chaparral_evergreen_(California)	54	Prunus_ilicifolia_ssp._ilicifolia	75.2345
Riparian_chaparral_evergreen_(California)	54	Lonicera_hispidula_var._vacillans	4.04175	231.288		Riparian_chaparral_evergreen_(California)	54	Prunus_ilicifolia_ssp._ilicifolia	47.7728
Riparian_chaparral_evergreen_(California)	54	Lonicera_hispidula_var._vacillans	5.62675	116.37		Riparian_chaparral_evergreen_(California)	54	Prunus_ilicifolia_ssp._ilicifolia	88.1382
Riparian_chaparral_evergreen_(California)	54	Lonicera_hispidula_var._vacillans	5.82764	221.393		Riparian_chaparral_evergreen_(California)	54	Prunus_ilicifolia_ssp._ilicifolia	63.4155
Riparian_chaparral_evergreen_(California)	54	Lonicera_hispidula_var._vacillans	15.5315	190.254		Riparian_chaparral_evergreen_(California)	54	Prunus_ilicifolia_ssp._ilicifolia	66.6236
Riparian_chaparral_evergreen_(California)	54	Lonicera_hispidula_var._vacillans	2.12192	162.399		Riparian_chaparral_evergreen_(California)	54	Prunus_ilicifolia_ssp._ilicifolia	85.5939
Riparian_chaparral_evergreen_(California)	54	Lonicera_hispidula_var._vacillans	2.359	159.04		Riparian_chaparral_evergreen_(California)	54	Prunus_ilicifolia_ssp._ilicifolia	59.0595
Riparian_chaparral_evergreen_(California)	54	Lonicera_hispidula_var._vacillans	4.0685	236.901		Riparian_chaparral_evergreen_(California)	54	Prunus_ilicifolia_ssp._ilicifolia	62.8855
Riparian_chaparral_evergreen_(California)	54	Lonicera_hispidula_var._vacillans	2.63112	121.992		Riparian_chaparral_evergreen_(California)	54	Prunus_ilicifolia_ssp._ilicifolia	61.2429
Riparian_chaparral_evergreen_(California)	54	Lonicera_hispidula_var._vacillans	5.37383	116.951		Riparian_chaparral_evergreen_(California)	54	Prunus_ilicifolia_ssp._ilicifolia	77.2576
Riparian_chaparral_evergreen_(California)	54	Lonicera_hispidula_var._vacillans	2.979	173.57		Riparian_chaparral_evergreen_(California)	54	Prunus_ilicifolia_ssp._ilicifolia	73.6048
Riparian_chaparral_evergreen_(California)	54	Lonicera_hispidula_var._vacillans	14.701	118.204		Riparian_chaparral_evergreen_(California)	54	Prunus_ilicifolia_ssp._ilicifolia	61.7256
Riparian_chaparral_evergreen_(California)	54	Lonicera_hispidula_var._vacillans	3.31775	83.3644		Riparian_chaparral_evergreen_(California)	54	Prunus_ilicifolia_ssp._ilicifolia	52.018
Riparian_chaparral_evergreen_(California)	54	Lonicera_hispidula_var._vacillans	2.21025	140.431		Riparian_chaparral_evergreen_(California)	54	Prunus_ilicifolia_ssp._ilicifolia	76.3972
Riparian_chaparral_evergreen_(California)	54	Lonicera_hispidula_var._vacillans	2.0846	156.557		Riparian_chaparral_evergreen_(California)	54	Prunus_ilicifolia_ssp._ilicifolia	74.6438
Riparian_chaparral_evergreen_(California)	54	Lonicera_hispidula_var._vacillans	2.08126	165.996		Riparian_chaparral_evergreen_(California)	54	Quercus_agrifolia__var._agrifolia	136.207
Riparian_chaparral_evergreen_(California)	54	Lonicera_hispidula_var._vacillans	3.50467	213.238		Riparian_chaparral_evergreen_(California)	54	Quercus_agrifolia__var._agrifolia	105.777
Riparian_chaparral_evergreen_(California)	54	Lonicera_hispidula_var._vacillans	2.666	264.398		Riparian_chaparral_evergreen_(California)	54	Quercus_agrifolia__var._agrifolia	65.8282
Riparian_chaparral_evergreen_(California)	54	Lonicera_hispidula_var._vacillans	6.00133	413.633		Riparian_chaparral_evergreen_(California)	54	Quercus_agrifolia__var._agrifolia	67.858
Riparian_chaparral_evergreen_(California)	54	Lonicera_hispidula_var._vacillans	2.97833	207.89		Riparian_chaparral_evergreen_(California)	54	Quercus_agrifolia__var._agrifolia	63.1564
Riparian_chaparral_evergreen_(California)	54	Lonicera_hispidula_var._vacillans	20.6447	201.304		Riparian_chaparral_evergreen_(California)	54	Quercus_agrifolia__var._agrifolia	72.8158
Riparian_chaparral_evergreen_(California)	54	Lonicera_hispidula_var._vacillans	4.482	105.89		Riparian_chaparral_evergreen_(California)	54	Quercus_agrifolia__var._agrifolia	50.2162
Riparian_chaparral_evergreen_(California)	54	Lonicera_hispidula_var._vacillans	6.54325	104.341		Riparian_chaparral_evergreen_(California)	54	Quercus_agrifolia__var._agrifolia	84.9431
Riparian_chaparral_evergreen_(California)	54	Lonicera_hispidula_var._vacillans	6.472	265.234		Riparian_chaparral_evergreen_(California)	54	Quercus_agrifolia__var._agrifolia	53.6354
Riparian_chaparral_evergreen_(California)	54	Lonicera_hispidula_var._vacillans	2.24852	NA		Riparian_chaparral_evergreen_(California)	54	Quercus_agrifolia__var._agrifolia	67.2981
Riparian_chaparral_evergreen_(California)	54	Lonicera_hispidula_var._vacillans	10.6995	NA		Riparian_chaparral_evergreen_(California)	54	Quercus_agrifolia__var._agrifolia	57.9265
Riparian_chaparral_evergreen_(California)	54	Lonicera_hispidula_var._vacillans	2.68562	NA		Riparian_chaparral_evergreen_(California)	54	Quercus_agrifolia__var._agrifolia	91.1938
Riparian_chaparral_evergreen_(California)	54	Lonicera_hispidula_var._vacillans	3.19917	NA		Riparian_chaparral_evergreen_(California)	54	Quercus_agrifolia__var._agrifolia	47.5242
Riparian_chaparral_evergreen_(California)	54	Mimulus_aurantiacus	2.96	94.3012		Riparian_chaparral_evergreen_(California)	54	Quercus_agrifolia__var._agrifolia	50.0611
Riparian_chaparral_evergreen_(California)	54	Mimulus_aurantiacus	2.23217	68.8061		Riparian_chaparral_evergreen_(California)	54	Quercus_agrifolia__var._agrifolia	93.7211
Riparian_chaparral_evergreen_(California)	54	Mimulus_aurantiacus	5.9426	104.666		Riparian_chaparral_evergreen_(California)	54	Quercus_agrifolia__var._agrifolia	72.6451
Riparian_chaparral_evergreen_(California)	54	Mimulus_aurantiacus	5.40937	100.842		Riparian_chaparral_evergreen_(California)	54	Quercus_agrifolia__var._agrifolia	35.7455
Riparian_chaparral_evergreen_(California)	54	Mimulus_aurantiacus	1.99703	97.763		Riparian_chaparral_evergreen_(California)	54	Quercus_agrifolia__var._agrifolia	40.9907
Riparian_chaparral_evergreen_(California)	54	Mimulus_aurantiacus	1.06342	128.056		Riparian_chaparral_evergreen_(California)	54	Quercus_agrifolia__var._agrifolia	48.4327
Riparian_chaparral_evergreen_(California)	54	Mimulus_aurantiacus	1.56583	41.5277		Riparian_chaparral_evergreen_(California)	54	Quercus_agrifolia__var._agrifolia	53.547
Riparian_chaparral_evergreen_(California)	54	Mimulus_aurantiacus	0.657338	32.3001		Riparian_chaparral_evergreen_(California)	54	Quercus_agrifolia__var._agrifolia	49.0565
Riparian_chaparral_evergreen_(California)	54	Mimulus_aurantiacus	2.73267	47.4087		Riparian_chaparral_evergreen_(California)	54	Quercus_agrifolia__var._agrifolia	73.4913
Riparian_chaparral_evergreen_(California)	54	Mimulus_aurantiacus	1.5235	43.5607		Riparian_chaparral_evergreen_(California)	54	Quercus_agrifolia__var._agrifolia	43.2359
Riparian_chaparral_evergreen_(California)	54	Mimulus_aurantiacus	1.96885	54.0084		Riparian_chaparral_evergreen_(California)	54	Quercus_agrifolia__var._agrifolia	58.1601
Riparian_chaparral_evergreen_(California)	54	Mimulus_aurantiacus	1.7795	71.65		Riparian_chaparral_evergreen_(California)	54	Quercus_agrifolia__var._agrifolia	70.4059
Riparian_chaparral_evergreen_(California)	54	Mimulus_aurantiacus	1.78	44.9639		Riparian_chaparral_evergreen_(California)	54	Quercus_agrifolia__var._agrifolia	41.8991
Riparian_chaparral_evergreen_(California)	54	Mimulus_aurantiacus	1.43391	122.167		Riparian_chaparral_evergreen_(California)	54	Quercus_agrifolia__var._agrifolia	46.4168
Riparian_chaparral_evergreen_(California)	54	Mimulus_aurantiacus	1.39422	49.1663		Riparian_chaparral_evergreen_(California)	54	Quercus_agrifolia__var._agrifolia	67.5348
Riparian_chaparral_evergreen_(California)	54	Mimulus_aurantiacus	2.66529	81.9846		Riparian_chaparral_evergreen_(California)	54	Quercus_agrifolia__var._agrifolia	54.6808
Riparian_chaparral_evergreen_(California)	54	Mimulus_aurantiacus	3.6825	57.9257		Riparian_chaparral_evergreen_(California)	54	Quercus_agrifolia__var._agrifolia	52.8976
Riparian_chaparral_evergreen_(California)	54	Mimulus_aurantiacus	2.3296	73.5616		Riparian_chaparral_evergreen_(California)	54	Quercus_agrifolia__var._agrifolia	56.1472
Riparian_chaparral_evergreen_(California)	54	Mimulus_aurantiacus	1.98775	157.855		Riparian_chaparral_evergreen_(California)	54	Quercus_agrifolia__var._agrifolia	58.996
Riparian_chaparral_evergreen_(California)	54	Mimulus_aurantiacus	1.74805	41.0298		Riparian_chaparral_evergreen_(California)	54	Quercus_agrifolia__var._agrifolia	46.93
Riparian_chaparral_evergreen_(California)	54	Mimulus_aurantiacus	1.12164	73.0619		Riparian_chaparral_evergreen_(California)	54	Quercus_agrifolia__var._agrifolia	64.6208
Riparian_chaparral_evergreen_(California)	54	Mimulus_aurantiacus	1.93243	45.4836		Riparian_chaparral_evergreen_(California)	54	Quercus_agrifolia__var._agrifolia	97.9502
Riparian_chaparral_evergreen_(California)	54	Mimulus_aurantiacus	4.394	98.427		Riparian_chaparral_evergreen_(California)	54	Quercus_agrifolia__var._agrifolia	45.2916
Riparian_chaparral_evergreen_(California)	54	Mimulus_aurantiacus	1.8314	51.1119		Riparian_chaparral_evergreen_(California)	54	Quercus_agrifolia__var._agrifolia	58.6783
Riparian_chaparral_evergreen_(California)	54	Prunus_ilicifolia_ssp._ilicifolia	5.31756	67.758		Riparian_chaparral_evergreen_(California)	54	Quercus_agrifolia__var._agrifolia	73.7326
Riparian_chaparral_evergreen_(California)	54	Prunus_ilicifolia_ssp._ilicifolia	3.81975	99.5818		Riparian_chaparral_evergreen_(California)	54	Quercus_agrifolia__var._agrifolia	NA
Riparian_chaparral_evergreen_(California)	54	Prunus_ilicifolia_ssp._ilicifolia	7.00767	66.8165		Riparian_chaparral_evergreen_(California)	54	Quercus_agrifolia__var._agrifolia	NA
Riparian_chaparral_evergreen_(California)	54	Prunus_ilicifolia_ssp._ilicifolia	6.411	87.1203		Riparian_chaparral_evergreen_(California)	54	Quercus_agrifolia__var._agrifolia	NA
Riparian_chaparral_evergreen_(California)	54	Prunus_ilicifolia_ssp._ilicifolia	4.3762	87.6542		Riparian_chaparral_evergreen_(California)	54	Quercus_douglasii	55.0537
Riparian_chaparral_evergreen_(California)	54	Prunus_ilicifolia_ssp._ilicifolia	4.43278	59.0288		Riparian_chaparral_evergreen_(California)	54	Quercus_douglasii	75.1232
Riparian_chaparral_evergreen_(California)	54	Prunus_ilicifolia_ssp._ilicifolia	3.13083	57.0569		Riparian_chaparral_evergreen_(California)	54	Quercus_douglasii	65.9831
Riparian_chaparral_evergreen_(California)	54	Prunus_ilicifolia_ssp._ilicifolia	3.22475	86.475		Riparian_chaparral_evergreen_(California)	54	Quercus_douglasii	83.153
Riparian_chaparral_evergreen_(California)	54	Prunus_ilicifolia_ssp._ilicifolia	4.6828	53.3176		Riparian_chaparral_evergreen_(California)	54	Quercus_douglasii	68.3322
Riparian_chaparral_evergreen_(California)	54	Prunus_ilicifolia_ssp._ilicifolia	3.79364	75.2345		Riparian_chaparral_evergreen_(California)	54	Quercus_douglasii	100.649
Riparian_chaparral_evergreen_(California)	54	Prunus_ilicifolia_ssp._ilicifolia	3.3725	47.7728		Riparian_chaparral_evergreen_(California)	54	Quercus_douglasii	92.876
Riparian_chaparral_evergreen_(California)	54	Prunus_ilicifolia_ssp._ilicifolia	6.57567	88.1382		Riparian_chaparral_evergreen_(California)	54	Quercus_douglasii	86.122
Riparian_chaparral_evergreen_(California)	54	Prunus_ilicifolia_ssp._ilicifolia	10.7147	63.4155		Riparian_chaparral_evergreen_(California)	54	Quercus_douglasii	69.0408
Riparian_chaparral_evergreen_(California)	54	Prunus_ilicifolia_ssp._ilicifolia	11.9045	66.6236		Riparian_chaparral_evergreen_(California)	54	Quercus_douglasii	64.5276
Riparian_chaparral_evergreen_(California)	54	Prunus_ilicifolia_ssp._ilicifolia	4.5395	85.5939		Riparian_chaparral_evergreen_(California)	54	Quercus_douglasii	NA
Riparian_chaparral_evergreen_(California)	54	Prunus_ilicifolia_ssp._ilicifolia	6.4978	59.0595		Riparian_chaparral_evergreen_(California)	54	Quercus_douglasii	NA
Riparian_chaparral_evergreen_(California)	54	Prunus_ilicifolia_ssp._ilicifolia	7.73325	62.8855		Riparian_chaparral_evergreen_(California)	54	Quercus_durata_var._durata	88.0801
Riparian_chaparral_evergreen_(California)	54	Prunus_ilicifolia_ssp._ilicifolia	8.02486	61.2429		Riparian_chaparral_evergreen_(California)	54	Quercus_durata_var._durata	126.567
Riparian_chaparral_evergreen_(California)	54	Prunus_ilicifolia_ssp._ilicifolia	14.9412	77.2576		Riparian_chaparral_evergreen_(California)	54	Quercus_durata_var._durata	69.102
Riparian_chaparral_evergreen_(California)	54	Prunus_ilicifolia_ssp._ilicifolia	12.8092	73.6048		Riparian_chaparral_evergreen_(California)	54	Quercus_durata_var._durata	69.5274
Riparian_chaparral_evergreen_(California)	54	Prunus_ilicifolia_ssp._ilicifolia	4.65433	61.7256		Riparian_chaparral_evergreen_(California)	54	Quercus_durata_var._durata	71.5997
Riparian_chaparral_evergreen_(California)	54	Prunus_ilicifolia_ssp._ilicifolia	3.067	52.018		Riparian_chaparral_evergreen_(California)	54	Quercus_durata_var._durata	60.6613
Riparian_chaparral_evergreen_(California)	54	Prunus_ilicifolia_ssp._ilicifolia	15.3768	76.3972		Riparian_chaparral_evergreen_(California)	54	Quercus_durata_var._durata	69.7546
Riparian_chaparral_evergreen_(California)	54	Prunus_ilicifolia_ssp._ilicifolia	10.2933	74.6438		Riparian_chaparral_evergreen_(California)	54	Quercus_durata_var._durata	50.7736
Riparian_chaparral_evergreen_(California)	54	Quercus_agrifolia__var._agrifolia	22.2892	136.207		Riparian_chaparral_evergreen_(California)	54	Quercus_durata_var._durata	67.4413
Riparian_chaparral_evergreen_(California)	54	Quercus_agrifolia__var._agrifolia	11.0748	105.777		Riparian_chaparral_evergreen_(California)	54	Quercus_durata_var._durata	53.6368
Riparian_chaparral_evergreen_(California)	54	Quercus_agrifolia__var._agrifolia	16.0328	65.8282		Riparian_chaparral_evergreen_(California)	54	Quercus_kelloggii	125.843
Riparian_chaparral_evergreen_(California)	54	Quercus_agrifolia__var._agrifolia	19.7103	67.858		Riparian_chaparral_evergreen_(California)	54	Quercus_kelloggii	93.6188
Riparian_chaparral_evergreen_(California)	54	Quercus_agrifolia__var._agrifolia	25.0165	63.1564		Riparian_chaparral_evergreen_(California)	54	Quercus_kelloggii	60.5055
Riparian_chaparral_evergreen_(California)	54	Quercus_agrifolia__var._agrifolia	7.55017	72.8158		Riparian_chaparral_evergreen_(California)	54	Quercus_kelloggii	108.008
Riparian_chaparral_evergreen_(California)	54	Quercus_agrifolia__var._agrifolia	9.98243	50.2162		Riparian_chaparral_evergreen_(California)	54	Quercus_kelloggii	155.55
Riparian_chaparral_evergreen_(California)	54	Quercus_agrifolia__var._agrifolia	11.8247	84.9431		Riparian_chaparral_evergreen_(California)	54	Quercus_kelloggii	118.571
Riparian_chaparral_evergreen_(California)	54	Quercus_agrifolia__var._agrifolia	14.9571	53.6354		Riparian_chaparral_evergreen_(California)	54	Quercus_kelloggii	83.3757
Riparian_chaparral_evergreen_(California)	54	Quercus_agrifolia__var._agrifolia	7.0242	67.2981		Riparian_chaparral_evergreen_(California)	54	Quercus_kelloggii	86.1627
Riparian_chaparral_evergreen_(California)	54	Quercus_agrifolia__var._agrifolia	3.01492	57.9265		Riparian_chaparral_evergreen_(California)	54	Quercus_kelloggii	157.965
Riparian_chaparral_evergreen_(California)	54	Quercus_agrifolia__var._agrifolia	6.18127	91.1938		Riparian_chaparral_evergreen_(California)	54	Quercus_kelloggii	129.364
Riparian_chaparral_evergreen_(California)	54	Quercus_agrifolia__var._agrifolia	11.0284	47.5242		Riparian_chaparral_evergreen_(California)	54	Quercus_lobata	139.616
Riparian_chaparral_evergreen_(California)	54	Quercus_agrifolia__var._agrifolia	8.52467	50.0611		Riparian_chaparral_evergreen_(California)	54	Quercus_lobata	93.1618
Riparian_chaparral_evergreen_(California)	54	Quercus_agrifolia__var._agrifolia	5.6255	93.7211		Riparian_chaparral_evergreen_(California)	54	Quercus_lobata	103.678
Riparian_chaparral_evergreen_(California)	54	Quercus_agrifolia__var._agrifolia	4.485	72.6451		Riparian_chaparral_evergreen_(California)	54	Quercus_lobata	82.1676
Riparian_chaparral_evergreen_(California)	54	Quercus_agrifolia__var._agrifolia	7.72486	35.7455		Riparian_chaparral_evergreen_(California)	54	Quercus_lobata	129.238
Riparian_chaparral_evergreen_(California)	54	Quercus_agrifolia__var._agrifolia	11.8673	40.9907		Riparian_chaparral_evergreen_(California)	54	Quercus_lobata	182.038
Riparian_chaparral_evergreen_(California)	54	Quercus_agrifolia__var._agrifolia	14.4035	48.4327		Riparian_chaparral_evergreen_(California)	54	Quercus_lobata	125.114
Riparian_chaparral_evergreen_(California)	54	Quercus_agrifolia__var._agrifolia	22.0278	53.547		Riparian_chaparral_evergreen_(California)	54	Quercus_lobata	78.6369
Riparian_chaparral_evergreen_(California)	54	Quercus_agrifolia__var._agrifolia	12.2818	49.0565		Riparian_chaparral_evergreen_(California)	54	Quercus_lobata	91.0047
Riparian_chaparral_evergreen_(California)	54	Quercus_agrifolia__var._agrifolia	13.1077	73.4913		Riparian_chaparral_evergreen_(California)	54	Quercus_lobata	102.141
Riparian_chaparral_evergreen_(California)	54	Quercus_agrifolia__var._agrifolia	6.06329	43.2359		Riparian_chaparral_evergreen_(California)	54	Quercus_lobata	NA
Riparian_chaparral_evergreen_(California)	54	Quercus_agrifolia__var._agrifolia	4.55417	58.1601		Riparian_chaparral_evergreen_(California)	54	Quercus_lobata	NA
Riparian_chaparral_evergreen_(California)	54	Quercus_agrifolia__var._agrifolia	8.45233	70.4059		Riparian_chaparral_evergreen_(California)	54	Rhamnus_californica_ssp._californica	96.563
Riparian_chaparral_evergreen_(California)	54	Quercus_agrifolia__var._agrifolia	6.028	41.8991		Riparian_chaparral_evergreen_(California)	54	Rhamnus_californica_ssp._californica	133.742
Riparian_chaparral_evergreen_(California)	54	Quercus_agrifolia__var._agrifolia	4.4878	46.4168		Riparian_chaparral_evergreen_(California)	54	Rhamnus_californica_ssp._californica	110.665
Riparian_chaparral_evergreen_(California)	54	Quercus_agrifolia__var._agrifolia	9.04037	67.5348		Riparian_chaparral_evergreen_(California)	54	Rhamnus_californica_ssp._californica	204.895
Riparian_chaparral_evergreen_(California)	54	Quercus_agrifolia__var._agrifolia	9.81117	54.6808		Riparian_chaparral_evergreen_(California)	54	Rhamnus_californica_ssp._californica	179.099
Riparian_chaparral_evergreen_(California)	54	Quercus_agrifolia__var._agrifolia	7.67788	52.8976		Riparian_chaparral_evergreen_(California)	54	Rhamnus_californica_ssp._californica	132.537
Riparian_chaparral_evergreen_(California)	54	Quercus_agrifolia__var._agrifolia	15.1164	56.1472		Riparian_chaparral_evergreen_(California)	54	Rhamnus_californica_ssp._californica	133.304
Riparian_chaparral_evergreen_(California)	54	Quercus_agrifolia__var._agrifolia	10.8793	58.996		Riparian_chaparral_evergreen_(California)	54	Rhamnus_californica_ssp._californica	89.1053
Riparian_chaparral_evergreen_(California)	54	Quercus_agrifolia__var._agrifolia	10.4115	46.93		Riparian_chaparral_evergreen_(California)	54	Rhamnus_californica_ssp._californica	101.401
Riparian_chaparral_evergreen_(California)	54	Quercus_agrifolia__var._agrifolia	10.1966	64.6208		Riparian_chaparral_evergreen_(California)	54	Rhamnus_californica_ssp._californica	173.489
Riparian_chaparral_evergreen_(California)	54	Quercus_agrifolia__var._agrifolia	13.122	97.9502		Riparian_chaparral_evergreen_(California)	54	Rhamnus_californica_ssp._californica	173.924
Riparian_chaparral_evergreen_(California)	54	Quercus_agrifolia__var._agrifolia	17.2508	45.2916		Riparian_chaparral_evergreen_(California)	54	Rhamnus_californica_ssp._californica	162.146
Riparian_chaparral_evergreen_(California)	54	Quercus_agrifolia__var._agrifolia	7.63233	58.6783		Riparian_chaparral_evergreen_(California)	54	Rhamnus_crocea	96.4211
Riparian_chaparral_evergreen_(California)	54	Quercus_agrifolia__var._agrifolia	17.2183	73.7326		Riparian_chaparral_evergreen_(California)	54	Rhamnus_crocea	77.2733
Riparian_chaparral_evergreen_(California)	54	Quercus_agrifolia__var._agrifolia	13.233	NA		Riparian_chaparral_evergreen_(California)	54	Rhamnus_crocea	75.7132
Riparian_chaparral_evergreen_(California)	54	Quercus_agrifolia__var._agrifolia	9.2	NA		Riparian_chaparral_evergreen_(California)	54	Rhamnus_crocea	116.535
Riparian_chaparral_evergreen_(California)	54	Quercus_agrifolia__var._agrifolia	6.72514	NA		Riparian_chaparral_evergreen_(California)	54	Rhamnus_crocea	136.911
Riparian_chaparral_evergreen_(California)	54	Quercus_douglasii	17.2967	55.0537		Riparian_chaparral_evergreen_(California)	54	Rhamnus_crocea	56.263
Riparian_chaparral_evergreen_(California)	54	Quercus_douglasii	16.4452	75.1232		Riparian_chaparral_evergreen_(California)	54	Rhamnus_crocea	89.1217
Riparian_chaparral_evergreen_(California)	54	Quercus_douglasii	6.076	65.9831		Riparian_chaparral_evergreen_(California)	54	Rhamnus_crocea	NA
Riparian_chaparral_evergreen_(California)	54	Quercus_douglasii	6.938	83.153		Riparian_chaparral_evergreen_(California)	54	Rhamnus_crocea	85.3253
Riparian_chaparral_evergreen_(California)	54	Quercus_douglasii	6.30216	68.3322		Riparian_chaparral_evergreen_(California)	54	Rhamnus_crocea	76.9311
Riparian_chaparral_evergreen_(California)	54	Quercus_douglasii	8.3455	100.649		Riparian_chaparral_evergreen_(California)	54	Rhamnus_crocea	120.945
Riparian_chaparral_evergreen_(California)	54	Quercus_douglasii	7.42386	92.876		Riparian_chaparral_evergreen_(California)	54	Rhamnus_crocea	78.4918
Riparian_chaparral_evergreen_(California)	54	Quercus_douglasii	5.8278	86.122		Riparian_chaparral_evergreen_(California)	54	Rhamnus_crocea	79.9191
Riparian_chaparral_evergreen_(California)	54	Quercus_douglasii	16.268	69.0408		Riparian_chaparral_evergreen_(California)	54	Rhamnus_crocea	73.2301
Riparian_chaparral_evergreen_(California)	54	Quercus_douglasii	10.0782	64.5276		Riparian_chaparral_evergreen_(California)	54	Rhamnus_crocea	186.589
Riparian_chaparral_evergreen_(California)	54	Quercus_douglasii	10.323	NA		Riparian_chaparral_evergreen_(California)	54	Rhamnus_crocea	83.4413
Riparian_chaparral_evergreen_(California)	54	Quercus_douglasii	12.88	NA		Riparian_chaparral_evergreen_(California)	54	Rhamnus_crocea	127.299
Riparian_chaparral_evergreen_(California)	54	Quercus_durata_var._durata	6.2615	88.0801		Riparian_chaparral_evergreen_(California)	54	Rhamnus_crocea	107.784
Riparian_chaparral_evergreen_(California)	54	Quercus_durata_var._durata	2.73156	126.567		Riparian_chaparral_evergreen_(California)	54	Rhamnus_crocea	88.9749
Riparian_chaparral_evergreen_(California)	54	Quercus_durata_var._durata	3.12756	69.102		Riparian_chaparral_evergreen_(California)	54	Rhamnus_crocea	83.9837
Riparian_chaparral_evergreen_(California)	54	Quercus_durata_var._durata	2.0645	69.5274		Riparian_chaparral_evergreen_(California)	54	Rhamnus_crocea	85.0088
Riparian_chaparral_evergreen_(California)	54	Quercus_durata_var._durata	2.4468	71.5997		Riparian_chaparral_evergreen_(California)	54	Rhamnus_crocea	144.146
Riparian_chaparral_evergreen_(California)	54	Quercus_durata_var._durata	2.17782	60.6613		Riparian_chaparral_evergreen_(California)	54	Rhamnus_crocea	72.8213
Riparian_chaparral_evergreen_(California)	54	Quercus_durata_var._durata	1.6933	69.7546		Riparian_chaparral_evergreen_(California)	54	Rhamnus_crocea	70.844
Riparian_chaparral_evergreen_(California)	54	Quercus_durata_var._durata	3.69525	50.7736		Riparian_chaparral_evergreen_(California)	54	Rhamnus_crocea	70.1273
Riparian_chaparral_evergreen_(California)	54	Quercus_durata_var._durata	4.2478	67.4413		Riparian_chaparral_evergreen_(California)	54	Rhamnus_crocea	84.0606
Riparian_chaparral_evergreen_(California)	54	Quercus_durata_var._durata	3.2089	53.6368		Riparian_chaparral_evergreen_(California)	54	Rhamnus_crocea	129.819
Riparian_chaparral_evergreen_(California)	54	Quercus_kelloggii	38.4552	125.843		Riparian_chaparral_evergreen_(California)	54	Rhamnus_crocea	130.14
Riparian_chaparral_evergreen_(California)	54	Quercus_kelloggii	51.282	93.6188		Riparian_chaparral_evergreen_(California)	54	Rhamnus_crocea	86.9905
Riparian_chaparral_evergreen_(California)	54	Quercus_kelloggii	58.85	60.5055		Riparian_chaparral_evergreen_(California)	54	Ribes_californicum_var._californicum	305.489
Riparian_chaparral_evergreen_(California)	54	Quercus_kelloggii	48.952	108.008		Riparian_chaparral_evergreen_(California)	54	Ribes_californicum_var._californicum	180.047
Riparian_chaparral_evergreen_(California)	54	Quercus_kelloggii	34.2036	155.55		Riparian_chaparral_evergreen_(California)	54	Ribes_californicum_var._californicum	171.504
Riparian_chaparral_evergreen_(California)	54	Quercus_kelloggii	25.98	118.571		Riparian_chaparral_evergreen_(California)	54	Ribes_californicum_var._californicum	127.138
Riparian_chaparral_evergreen_(California)	54	Quercus_kelloggii	57.236	83.3757		Riparian_chaparral_evergreen_(California)	54	Ribes_californicum_var._californicum	238.641
Riparian_chaparral_evergreen_(California)	54	Quercus_kelloggii	61.538	86.1627		Riparian_chaparral_evergreen_(California)	54	Ribes_californicum_var._californicum	139.832
Riparian_chaparral_evergreen_(California)	54	Quercus_kelloggii	28.873	157.965		Riparian_chaparral_evergreen_(California)	54	Ribes_californicum_var._californicum	348.073
Riparian_chaparral_evergreen_(California)	54	Quercus_kelloggii	31.3552	129.364		Riparian_chaparral_evergreen_(California)	54	Ribes_californicum_var._californicum	212.967
Riparian_chaparral_evergreen_(California)	54	Quercus_lobata	9.00769	139.616		Riparian_chaparral_evergreen_(California)	54	Ribes_californicum_var._californicum	144.081
Riparian_chaparral_evergreen_(California)	54	Quercus_lobata	17.1347	93.1618		Riparian_chaparral_evergreen_(California)	54	Ribes_californicum_var._californicum	216.557
Riparian_chaparral_evergreen_(California)	54	Quercus_lobata	33.7086	103.678		Riparian_chaparral_evergreen_(California)	54	Ribes_californicum_var._californicum	225.998
Riparian_chaparral_evergreen_(California)	54	Quercus_lobata	39.2367	82.1676		Riparian_chaparral_evergreen_(California)	54	Ribes_californicum_var._californicum	230.392
Riparian_chaparral_evergreen_(California)	54	Quercus_lobata	47.3196	129.238		Riparian_chaparral_evergreen_(California)	54	Ribes_californicum_var._californicum	467.277
Riparian_chaparral_evergreen_(California)	54	Quercus_lobata	14.8145	182.038		Riparian_chaparral_evergreen_(California)	54	Ribes_californicum_var._californicum	438.459
Riparian_chaparral_evergreen_(California)	54	Quercus_lobata	9.752	125.114		Riparian_chaparral_evergreen_(California)	54	Ribes_californicum_var._californicum	234.472
Riparian_chaparral_evergreen_(California)	54	Quercus_lobata	11.8235	78.6369		Riparian_chaparral_evergreen_(California)	54	Ribes_californicum_var._californicum	126.649
Riparian_chaparral_evergreen_(California)	54	Quercus_lobata	17.8667	91.0047		Riparian_chaparral_evergreen_(California)	54	Ribes_californicum_var._californicum	245.899
Riparian_chaparral_evergreen_(California)	54	Quercus_lobata	87.5195	102.141		Riparian_chaparral_evergreen_(California)	54	Ribes_californicum_var._californicum	386.843
Riparian_chaparral_evergreen_(California)	54	Quercus_lobata	11.2705	NA		Riparian_chaparral_evergreen_(California)	54	Ribes_californicum_var._californicum	248.078
Riparian_chaparral_evergreen_(California)	54	Quercus_lobata	22.386	NA		Riparian_chaparral_evergreen_(California)	54	Ribes_californicum_var._californicum	151.064
Riparian_chaparral_evergreen_(California)	54	Rhamnus_californica_ssp._californica	14.2548	96.563		Riparian_chaparral_evergreen_(California)	54	Ribes_californicum_var._californicum	244.004
Riparian_chaparral_evergreen_(California)	54	Rhamnus_californica_ssp._californica	12.9471	133.742		Riparian_chaparral_evergreen_(California)	54	Ribes_californicum_var._californicum	121.675
Riparian_chaparral_evergreen_(California)	54	Rhamnus_californica_ssp._californica	12.7165	110.665		Riparian_chaparral_evergreen_(California)	54	Ribes_californicum_var._californicum	142.063
Riparian_chaparral_evergreen_(California)	54	Rhamnus_californica_ssp._californica	10.783	204.895		Riparian_chaparral_evergreen_(California)	54	Ribes_californicum_var._californicum	276.567
Riparian_chaparral_evergreen_(California)	54	Rhamnus_californica_ssp._californica	5.363	179.099		Riparian_chaparral_evergreen_(California)	54	Ribes_californicum_var._californicum	238.637
Riparian_chaparral_evergreen_(California)	54	Rhamnus_californica_ssp._californica	13.093	132.537		Riparian_chaparral_evergreen_(California)	54	Ribes_californicum_var._californicum	152.98
Riparian_chaparral_evergreen_(California)	54	Rhamnus_californica_ssp._californica	10.1183	133.304		Riparian_chaparral_evergreen_(California)	54	Ribes_californicum_var._californicum	NA
Riparian_chaparral_evergreen_(California)	54	Rhamnus_californica_ssp._californica	9.05087	89.1053		Riparian_chaparral_evergreen_(California)	54	Ribes_californicum_var._californicum	NA
Riparian_chaparral_evergreen_(California)	54	Rhamnus_californica_ssp._californica	11.99	101.401		Riparian_chaparral_evergreen_(California)	54	Ribes_sanguineum_var._glutinosum	237.934
Riparian_chaparral_evergreen_(California)	54	Rhamnus_californica_ssp._californica	15.0752	173.489		Riparian_chaparral_evergreen_(California)	54	Ribes_sanguineum_var._glutinosum	260.069
Riparian_chaparral_evergreen_(California)	54	Rhamnus_californica_ssp._californica	13.6462	173.924		Riparian_chaparral_evergreen_(California)	54	Ribes_sanguineum_var._glutinosum	157.812
Riparian_chaparral_evergreen_(California)	54	Rhamnus_californica_ssp._californica	8.0065	162.146		Riparian_chaparral_evergreen_(California)	54	Ribes_sanguineum_var._glutinosum	372.716
Riparian_chaparral_evergreen_(California)	54	Rhamnus_crocea	3.56373	96.4211		Riparian_chaparral_evergreen_(California)	54	Ribes_sanguineum_var._glutinosum	453.637
Riparian_chaparral_evergreen_(California)	54	Rhamnus_crocea	4.51589	77.2733		Riparian_chaparral_evergreen_(California)	54	Ribes_sanguineum_var._glutinosum	679.362
Riparian_chaparral_evergreen_(California)	54	Rhamnus_crocea	0.65745	75.7132		Riparian_chaparral_evergreen_(California)	54	Ribes_sanguineum_var._glutinosum	367.437
Riparian_chaparral_evergreen_(California)	54	Rhamnus_crocea	0.59041	116.535		Riparian_chaparral_evergreen_(California)	54	Ribes_sanguineum_var._glutinosum	626.005
Riparian_chaparral_evergreen_(California)	54	Rhamnus_crocea	0.74891	136.911		Riparian_chaparral_evergreen_(California)	54	Ribes_sanguineum_var._glutinosum	112.46
Riparian_chaparral_evergreen_(California)	54	Rhamnus_crocea	0.622183	56.263		Riparian_chaparral_evergreen_(California)	54	Ribes_sanguineum_var._glutinosum	244.022
Riparian_chaparral_evergreen_(California)	54	Rhamnus_crocea	1.21509	89.1217		Riparian_chaparral_evergreen_(California)	54	Ribes_sanguineum_var._glutinosum	257.648
Riparian_chaparral_evergreen_(California)	54	Rhamnus_crocea	0.421431	NA		Riparian_chaparral_evergreen_(California)	54	Salix_lucida_ssp._lasiandra	263.201
Riparian_chaparral_evergreen_(California)	54	Rhamnus_crocea	0.3626	85.3253		Riparian_chaparral_evergreen_(California)	54	Salix_lucida_ssp._lasiandra	197.621
Riparian_chaparral_evergreen_(California)	54	Rhamnus_crocea	0.9282	76.9311		Riparian_chaparral_evergreen_(California)	54	Salix_lucida_ssp._lasiandra	245.8
Riparian_chaparral_evergreen_(California)	54	Rhamnus_crocea	0.976417	120.945		Riparian_chaparral_evergreen_(California)	54	Salix_lucida_ssp._lasiandra	220.154
Riparian_chaparral_evergreen_(California)	54	Rhamnus_crocea	1.782	78.4918		Riparian_chaparral_evergreen_(California)	54	Salix_lucida_ssp._lasiandra	132.969
Riparian_chaparral_evergreen_(California)	54	Rhamnus_crocea	1.77622	79.9191		Riparian_chaparral_evergreen_(California)	54	Salix_lucida_ssp._lasiandra	269.347
Riparian_chaparral_evergreen_(California)	54	Rhamnus_crocea	0.606925	73.2301		Riparian_chaparral_evergreen_(California)	54	Salix_lucida_ssp._lasiandra	241.608
Riparian_chaparral_evergreen_(California)	54	Rhamnus_crocea	0.693771	186.589		Riparian_chaparral_evergreen_(California)	54	Salix_lucida_ssp._lasiandra	110.828
Riparian_chaparral_evergreen_(California)	54	Rhamnus_crocea	1.04673	83.4413		Riparian_chaparral_evergreen_(California)	54	Salix_lucida_ssp._lasiandra	200.524
Riparian_chaparral_evergreen_(California)	54	Rhamnus_crocea	0.542235	127.299		Riparian_chaparral_evergreen_(California)	54	Salix_lucida_ssp._lasiandra	144.582
Riparian_chaparral_evergreen_(California)	54	Rhamnus_crocea	0.7984	107.784		Riparian_chaparral_evergreen_(California)	54	Salix_lucida_ssp._lasiandra	345.914
Riparian_chaparral_evergreen_(California)	54	Rhamnus_crocea	0.97849	88.9749		Riparian_chaparral_evergreen_(California)	54	Salix_lucida_ssp._lasiandra	116.122
Riparian_chaparral_evergreen_(California)	54	Rhamnus_crocea	0.6817	83.9837		Riparian_chaparral_evergreen_(California)	54	Salix_lucida_ssp._lasiandra	163.65
Riparian_chaparral_evergreen_(California)	54	Rhamnus_crocea	0.549137	85.0088		Riparian_chaparral_evergreen_(California)	54	Salix_lucida_ssp._lasiandra	NA
Riparian_chaparral_evergreen_(California)	54	Rhamnus_crocea	0.473778	144.146		Riparian_chaparral_evergreen_(California)	54	Symphoricarpos_albus_var._laevigatus	316.136
Riparian_chaparral_evergreen_(California)	54	Rhamnus_crocea	0.667913	72.8213		Riparian_chaparral_evergreen_(California)	54	Symphoricarpos_albus_var._laevigatus	453.379
Riparian_chaparral_evergreen_(California)	54	Rhamnus_crocea	2.4482	70.844		Riparian_chaparral_evergreen_(California)	54	Symphoricarpos_albus_var._laevigatus	284.764
Riparian_chaparral_evergreen_(California)	54	Rhamnus_crocea	1.00895	70.1273		Riparian_chaparral_evergreen_(California)	54	Symphoricarpos_albus_var._laevigatus	171.92
Riparian_chaparral_evergreen_(California)	54	Rhamnus_crocea	0.9303	84.0606		Riparian_chaparral_evergreen_(California)	54	Symphoricarpos_albus_var._laevigatus	161.572
Riparian_chaparral_evergreen_(California)	54	Rhamnus_crocea	1.18184	129.819		Riparian_chaparral_evergreen_(California)	54	Symphoricarpos_albus_var._laevigatus	325.393
Riparian_chaparral_evergreen_(California)	54	Rhamnus_crocea	0.668545	130.14		Riparian_chaparral_evergreen_(California)	54	Symphoricarpos_albus_var._laevigatus	397.751
Riparian_chaparral_evergreen_(California)	54	Rhamnus_crocea	1.718	86.9905		Riparian_chaparral_evergreen_(California)	54	Symphoricarpos_albus_var._laevigatus	225.338
Riparian_chaparral_evergreen_(California)	54	Ribes_californicum_var._californicum	1.83717	305.489		Riparian_chaparral_evergreen_(California)	54	Symphoricarpos_albus_var._laevigatus	653.252
Riparian_chaparral_evergreen_(California)	54	Ribes_californicum_var._californicum	3.47125	180.047		Riparian_chaparral_evergreen_(California)	54	Symphoricarpos_albus_var._laevigatus	671.529
Riparian_chaparral_evergreen_(California)	54	Ribes_californicum_var._californicum	3.94175	171.504		Riparian_chaparral_evergreen_(California)	54	Symphoricarpos_albus_var._laevigatus	214.743
Riparian_chaparral_evergreen_(California)	54	Ribes_californicum_var._californicum	2.95383	127.138		Riparian_chaparral_evergreen_(California)	54	Symphoricarpos_albus_var._laevigatus	195.574
Riparian_chaparral_evergreen_(California)	54	Ribes_californicum_var._californicum	2.739	238.641		Riparian_chaparral_evergreen_(California)	54	Symphoricarpos_albus_var._laevigatus	313.834
Riparian_chaparral_evergreen_(California)	54	Ribes_californicum_var._californicum	2.25813	139.832		Riparian_chaparral_evergreen_(California)	54	Symphoricarpos_albus_var._laevigatus	511.618
Riparian_chaparral_evergreen_(California)	54	Ribes_californicum_var._californicum	2.91783	348.073		Riparian_chaparral_evergreen_(California)	54	Symphoricarpos_albus_var._laevigatus	236.038
Riparian_chaparral_evergreen_(California)	54	Ribes_californicum_var._californicum	1.28665	212.967		Riparian_chaparral_evergreen_(California)	54	Symphoricarpos_albus_var._laevigatus	214.08
Riparian_chaparral_evergreen_(California)	54	Ribes_californicum_var._californicum	1.27845	144.081		Riparian_chaparral_evergreen_(California)	54	Symphoricarpos_albus_var._laevigatus	297.344
Riparian_chaparral_evergreen_(California)	54	Ribes_californicum_var._californicum	1.02023	216.557		Riparian_chaparral_evergreen_(California)	54	Symphoricarpos_albus_var._laevigatus	597.607
Riparian_chaparral_evergreen_(California)	54	Ribes_californicum_var._californicum	1.564	225.998		Riparian_chaparral_evergreen_(California)	54	Symphoricarpos_albus_var._laevigatus	673.943
Riparian_chaparral_evergreen_(California)	54	Ribes_californicum_var._californicum	3.1835	230.392		Riparian_chaparral_evergreen_(California)	54	Symphoricarpos_albus_var._laevigatus	220.663
Riparian_chaparral_evergreen_(California)	54	Ribes_californicum_var._californicum	3.00667	467.277		Riparian_chaparral_evergreen_(California)	54	Symphoricarpos_albus_var._laevigatus	495.748
Riparian_chaparral_evergreen_(California)	54	Ribes_californicum_var._californicum	2.04933	438.459		Riparian_chaparral_evergreen_(California)	54	Symphoricarpos_mollis	420.418
Riparian_chaparral_evergreen_(California)	54	Ribes_californicum_var._californicum	2.07	234.472		Riparian_chaparral_evergreen_(California)	54	Symphoricarpos_mollis	400.154
Riparian_chaparral_evergreen_(California)	54	Ribes_californicum_var._californicum	2.912	126.649		Riparian_chaparral_evergreen_(California)	54	Symphoricarpos_mollis	976.642
Riparian_chaparral_evergreen_(California)	54	Ribes_californicum_var._californicum	11.333	245.899		Riparian_chaparral_evergreen_(California)	54	Symphoricarpos_mollis	402.034
Riparian_chaparral_evergreen_(California)	54	Ribes_californicum_var._californicum	13.6758	386.843		Riparian_chaparral_evergreen_(California)	54	Symphoricarpos_mollis	406.182
Riparian_chaparral_evergreen_(California)	54	Ribes_californicum_var._californicum	2.0922	248.078		Riparian_chaparral_evergreen_(California)	54	Symphoricarpos_mollis	393.022
Riparian_chaparral_evergreen_(California)	54	Ribes_californicum_var._californicum	2.30017	151.064		Riparian_chaparral_evergreen_(California)	54	Symphoricarpos_mollis	229.398
Riparian_chaparral_evergreen_(California)	54	Ribes_californicum_var._californicum	2.3588	244.004		Riparian_chaparral_evergreen_(California)	54	Symphoricarpos_mollis	254.328
Riparian_chaparral_evergreen_(California)	54	Ribes_californicum_var._californicum	2.47325	121.675		Riparian_chaparral_evergreen_(California)	54	Symphoricarpos_mollis	271.694
Riparian_chaparral_evergreen_(California)	54	Ribes_californicum_var._californicum	1.80675	142.063		Riparian_chaparral_evergreen_(California)	54	Symphoricarpos_mollis	387.99
Riparian_chaparral_evergreen_(California)	54	Ribes_californicum_var._californicum	1.664	276.567		Riparian_chaparral_evergreen_(California)	54	Symphoricarpos_mollis	304.307
Riparian_chaparral_evergreen_(California)	54	Ribes_californicum_var._californicum	1.36497	238.637		Riparian_chaparral_evergreen_(California)	54	Symphoricarpos_mollis	233.992
Riparian_chaparral_evergreen_(California)	54	Ribes_californicum_var._californicum	3.10783	152.98		Riparian_chaparral_evergreen_(California)	54	Symphoricarpos_mollis	337.169
Riparian_chaparral_evergreen_(California)	54	Ribes_californicum_var._californicum	1.12064	NA		Riparian_chaparral_evergreen_(California)	54	Symphoricarpos_mollis	338.604
Riparian_chaparral_evergreen_(California)	54	Ribes_californicum_var._californicum	2.3624	NA		Riparian_chaparral_evergreen_(California)	54	Symphoricarpos_mollis	417.695
Riparian_chaparral_evergreen_(California)	54	Ribes_sanguineum_var._glutinosum	31.18	237.934		Riparian_chaparral_evergreen_(California)	54	Symphoricarpos_mollis	282.651
Riparian_chaparral_evergreen_(California)	54	Ribes_sanguineum_var._glutinosum	39.8433	260.069		Riparian_chaparral_evergreen_(California)	54	Symphoricarpos_mollis	323.61
Riparian_chaparral_evergreen_(California)	54	Ribes_sanguineum_var._glutinosum	33.7675	157.812		Riparian_chaparral_evergreen_(California)	54	Symphoricarpos_mollis	253.037
Riparian_chaparral_evergreen_(California)	54	Ribes_sanguineum_var._glutinosum	46.6767	372.716		Riparian_chaparral_evergreen_(California)	54	Symphoricarpos_mollis	250.94
Riparian_chaparral_evergreen_(California)	54	Ribes_sanguineum_var._glutinosum	46.355	453.637		Riparian_chaparral_evergreen_(California)	54	Symphoricarpos_mollis	257.385
Riparian_chaparral_evergreen_(California)	54	Ribes_sanguineum_var._glutinosum	26.5273	679.362		Riparian_chaparral_evergreen_(California)	54	Symphoricarpos_mollis	287.008
Riparian_chaparral_evergreen_(California)	54	Ribes_sanguineum_var._glutinosum	64.5063	367.437		Riparian_chaparral_evergreen_(California)	54	Symphoricarpos_mollis	339.357
Riparian_chaparral_evergreen_(California)	54	Ribes_sanguineum_var._glutinosum	6.74833	626.005		Riparian_chaparral_evergreen_(California)	54	Symphoricarpos_mollis	249.87
Riparian_chaparral_evergreen_(California)	54	Ribes_sanguineum_var._glutinosum	11.1188	112.46		Riparian_chaparral_evergreen_(California)	54	Symphoricarpos_mollis	437.801
Riparian_chaparral_evergreen_(California)	54	Ribes_sanguineum_var._glutinosum	21.7071	244.022		Riparian_chaparral_evergreen_(California)	54	Symphoricarpos_mollis	660.836
Riparian_chaparral_evergreen_(California)	54	Ribes_sanguineum_var._glutinosum	28.605	257.648		Riparian_chaparral_evergreen_(California)	54	Symphoricarpos_mollis	326.654
Riparian_chaparral_evergreen_(California)	54	Rubus_ursinus	23.178	NA		Riparian_chaparral_evergreen_(California)	54	Umbellularia_californica	107.164
Riparian_chaparral_evergreen_(California)	54	Rubus_ursinus	12.6915	NA		Riparian_chaparral_evergreen_(California)	54	Umbellularia_californica	109.225
Riparian_chaparral_evergreen_(California)	54	Rubus_ursinus	30.6675	NA		Riparian_chaparral_evergreen_(California)	54	Umbellularia_californica	101.28
Riparian_chaparral_evergreen_(California)	54	Rubus_ursinus	24.5182	NA		Riparian_chaparral_evergreen_(California)	54	Umbellularia_californica	104.953
Riparian_chaparral_evergreen_(California)	54	Rubus_ursinus	18.9012	NA		Riparian_chaparral_evergreen_(California)	54	Umbellularia_californica	108.343
Riparian_chaparral_evergreen_(California)	54	Rubus_ursinus	10.3576	NA		Riparian_chaparral_evergreen_(California)	54	Umbellularia_californica	99.9148
Riparian_chaparral_evergreen_(California)	54	Rubus_ursinus	8.77289	NA		Riparian_chaparral_evergreen_(California)	54	Umbellularia_californica	106.886
Riparian_chaparral_evergreen_(California)	54	Rubus_ursinus	9.20789	NA		Riparian_chaparral_evergreen_(California)	54	Umbellularia_californica	86.4356
Riparian_chaparral_evergreen_(California)	54	Rubus_ursinus	9.203	NA		Riparian_chaparral_evergreen_(California)	54	Umbellularia_californica	94.5412
Riparian_chaparral_evergreen_(California)	54	Rubus_ursinus	9.755	NA		Riparian_chaparral_evergreen_(California)	54	Umbellularia_californica	110.423
Riparian_chaparral_evergreen_(California)	54	Rubus_ursinus	24.3537	NA		Riparian_chaparral_evergreen_(California)	54	Umbellularia_californica	113.401
Riparian_chaparral_evergreen_(California)	54	Rubus_ursinus	24.545	NA		Riparian_chaparral_evergreen_(California)	54	Umbellularia_californica	96.7154
Riparian_chaparral_evergreen_(California)	54	Rubus_ursinus	9.42489	NA		Riparian_chaparral_evergreen_(California)	54	Umbellularia_californica	129.13
Riparian_chaparral_evergreen_(California)	54	Rubus_ursinus	6.82867	NA		Riparian_chaparral_evergreen_(California)	54	Umbellularia_californica	126.601
Riparian_chaparral_evergreen_(California)	54	Rubus_ursinus	30.1	NA		Riparian_chaparral_evergreen_(California)	54	Umbellularia_californica	113.885
Riparian_chaparral_evergreen_(California)	54	Rubus_ursinus	16.0275	NA		Riparian_chaparral_evergreen_(California)	54	Umbellularia_californica	128.536
Riparian_chaparral_evergreen_(California)	54	Rubus_ursinus	12.685	NA		Riparian_chaparral_evergreen_(California)	54	Umbellularia_californica	101.83
Riparian_chaparral_evergreen_(California)	54	Rubus_ursinus	24.4229	NA		Riparian_chaparral_evergreen_(California)	54	Umbellularia_californica	125.255
Riparian_chaparral_evergreen_(California)	54	Rubus_ursinus	11.1692	NA		Riparian_chaparral_evergreen_(California)	54	Umbellularia_californica	92.7567
Riparian_chaparral_evergreen_(California)	54	Rubus_ursinus	12.705	NA		Riparian_chaparral_evergreen_(California)	54	Umbellularia_californica	93.8641
Riparian_chaparral_evergreen_(California)	54	Rubus_ursinus	25.7067	NA		Riparian_chaparral_evergreen_(California)	54	Umbellularia_californica	77.275
Riparian_chaparral_evergreen_(California)	54	Rubus_ursinus	15.0814	NA		Riparian_chaparral_evergreen_(California)	54	Umbellularia_californica	104.829
Riparian_chaparral_evergreen_(California)	54	Rubus_ursinus	7.18775	NA		Riparian_chaparral_evergreen_(California)	54	Umbellularia_californica	136.686
Riparian_chaparral_evergreen_(California)	54	Rubus_ursinus	12.1083	NA		Riparian_chaparral_evergreen_(California)	54	Umbellularia_californica	103.988
Riparian_chaparral_evergreen_(California)	54	Rubus_ursinus	11.1901	NA		Riparian_chaparral_evergreen_(California)	54	Umbellularia_californica	147.07
Riparian_chaparral_evergreen_(California)	54	Rubus_ursinus	11.7011	NA		Riparian_chaparral_evergreen_(California)	54	Umbellularia_californica	118.582
Riparian_chaparral_evergreen_(California)	54	Salix_lucida_ssp._lasiandra	22.6033	263.201		Riparian_chaparral_evergreen_(California)	54	Umbellularia_californica	116.209
Riparian_chaparral_evergreen_(California)	54	Salix_lucida_ssp._lasiandra	17.989	197.621		Riparian_chaparral_evergreen_(California)	54	Umbellularia_californica	98.5091
Riparian_chaparral_evergreen_(California)	54	Salix_lucida_ssp._lasiandra	11.6642	245.8		Lowland_trop_rainf_(Acarouany_FG)	148	Protium.gallicum	145
Riparian_chaparral_evergreen_(California)	54	Salix_lucida_ssp._lasiandra	21.938	220.154		Lowland_trop_rainf_(Acarouany_FG)	148	Protium.gallicum	131.4
Riparian_chaparral_evergreen_(California)	54	Salix_lucida_ssp._lasiandra	20.0442	132.969		Lowland_trop_rainf_(Acarouany_FG)	148	Protium.gallicum	131
Riparian_chaparral_evergreen_(California)	54	Salix_lucida_ssp._lasiandra	25.8513	269.347		Lowland_trop_rainf_(Acarouany_FG)	148	Protium.gallicum	159.5
Riparian_chaparral_evergreen_(California)	54	Salix_lucida_ssp._lasiandra	35.398	241.608		Lowland_trop_rainf_(Acarouany_FG)	148	Protium.gallicum	151
Riparian_chaparral_evergreen_(California)	54	Salix_lucida_ssp._lasiandra	26.205	110.828		Lowland_trop_rainf_(Acarouany_FG)	148	Protium.gallicum	176.3
Riparian_chaparral_evergreen_(California)	54	Salix_lucida_ssp._lasiandra	13.7273	200.524		Lowland_trop_rainf_(Acarouany_FG)	148	Protium.gallicum	155.8
Riparian_chaparral_evergreen_(California)	54	Salix_lucida_ssp._lasiandra	10.3078	144.582		Lowland_trop_rainf_(Acarouany_FG)	148	Protium.gallicum	157.9
Riparian_chaparral_evergreen_(California)	54	Salix_lucida_ssp._lasiandra	12.7441	345.914		Lowland_trop_rainf_(Acarouany_FG)	148	Protium.gallicum	99.3
Riparian_chaparral_evergreen_(California)	54	Salix_lucida_ssp._lasiandra	16.5893	116.122		Lowland_trop_rainf_(Acarouany_FG)	148	Protium.gallicum	117.9
Riparian_chaparral_evergreen_(California)	54	Salix_lucida_ssp._lasiandra	18.3109	163.65		Lowland_trop_rainf_(Acarouany_FG)	148	Protium.gallicum	140.1
Riparian_chaparral_evergreen_(California)	54	Salix_lucida_ssp._lasiandra	23.1095	NA		Lowland_trop_rainf_(Acarouany_FG)	148	Protium.gallicum	153.5
Riparian_chaparral_evergreen_(California)	54	Sambucus_mexicana	32.9563	99.3663		Lowland_trop_rainf_(Acarouany_FG)	148	Protium.gallicum	182.2
Riparian_chaparral_evergreen_(California)	54	Sambucus_mexicana	19.0271	81.8656		Lowland_trop_rainf_(Acarouany_FG)	148	Protium.gallicum	204.5
Riparian_chaparral_evergreen_(California)	54	Sambucus_mexicana	19.87	117.296		Lowland_trop_rainf_(Acarouany_FG)	148	Protium.gallicum	108.3
Riparian_chaparral_evergreen_(California)	54	Sambucus_mexicana	12.8067	NA		Lowland_trop_rainf_(Acarouany_FG)	148	Protium.gallicum	145.1
Riparian_chaparral_evergreen_(California)	54	Sambucus_mexicana	3.32513	NA		Lowland_trop_rainf_(Acarouany_FG)	148	Protium.gallicum	133.9
Riparian_chaparral_evergreen_(California)	54	Sambucus_mexicana	5.98927	NA		Lowland_trop_rainf_(Acarouany_FG)	148	Protium.gallicum	163.8
Riparian_chaparral_evergreen_(California)	54	Sambucus_mexicana	5.02965	NA		Lowland_trop_rainf_(Acarouany_FG)	148	Protium.gallicum	110.4
Riparian_chaparral_evergreen_(California)	54	Sambucus_mexicana	3.72445	NA		Lowland_trop_rainf_(Acarouany_FG)	148	Protium.gallicum	156.1
Riparian_chaparral_evergreen_(California)	54	Sambucus_mexicana	3.52052	NA		Lowland_trop_rainf_(Acarouany_FG)	148	Protium.gallicum	150.4
Riparian_chaparral_evergreen_(California)	54	Sambucus_mexicana	3.42948	NA		Lowland_trop_rainf_(Acarouany_FG)	148	Protium.gallicum	135.8
Riparian_chaparral_evergreen_(California)	54	Symphoricarpos_albus_var._laevigatus	13.9725	316.136		Lowland_trop_rainf_(Acarouany_FG)	148	Poraqueiba.guianensis	125.6
Riparian_chaparral_evergreen_(California)	54	Symphoricarpos_albus_var._laevigatus	6.8385	453.379		Lowland_trop_rainf_(Acarouany_FG)	148	Poraqueiba.guianensis	112
Riparian_chaparral_evergreen_(California)	54	Symphoricarpos_albus_var._laevigatus	3.1356	284.764		Lowland_trop_rainf_(Acarouany_FG)	148	Poraqueiba.guianensis	99.2
Riparian_chaparral_evergreen_(California)	54	Symphoricarpos_albus_var._laevigatus	2.5135	171.92		Lowland_trop_rainf_(Acarouany_FG)	148	Poraqueiba.guianensis	90.5
Riparian_chaparral_evergreen_(California)	54	Symphoricarpos_albus_var._laevigatus	4.87578	161.572		Lowland_trop_rainf_(Acarouany_FG)	148	Poraqueiba.guianensis	91.4
Riparian_chaparral_evergreen_(California)	54	Symphoricarpos_albus_var._laevigatus	2.73062	325.393		Lowland_trop_rainf_(Acarouany_FG)	148	Poraqueiba.guianensis	102.3
Riparian_chaparral_evergreen_(California)	54	Symphoricarpos_albus_var._laevigatus	7.769	397.751		Lowland_trop_rainf_(Acarouany_FG)	148	Poraqueiba.guianensis	102.3
Riparian_chaparral_evergreen_(California)	54	Symphoricarpos_albus_var._laevigatus	8.834	225.338		Lowland_trop_rainf_(Acarouany_FG)	148	Poraqueiba.guianensis	103.6
Riparian_chaparral_evergreen_(California)	54	Symphoricarpos_albus_var._laevigatus	6.704	653.252		Lowland_trop_rainf_(Acarouany_FG)	148	Poraqueiba.guianensis	94.5
Riparian_chaparral_evergreen_(California)	54	Symphoricarpos_albus_var._laevigatus	5.65533	671.529		Lowland_trop_rainf_(Acarouany_FG)	148	Poraqueiba.guianensis	96.2
Riparian_chaparral_evergreen_(California)	54	Symphoricarpos_albus_var._laevigatus	1.50933	214.743		Lowland_trop_rainf_(Acarouany_FG)	148	Poraqueiba.guianensis	82.9
Riparian_chaparral_evergreen_(California)	54	Symphoricarpos_albus_var._laevigatus	2.76343	195.574		Lowland_trop_rainf_(Acarouany_FG)	148	Poraqueiba.guianensis	109
Riparian_chaparral_evergreen_(California)	54	Symphoricarpos_albus_var._laevigatus	2.98743	313.834		Lowland_trop_rainf_(Acarouany_FG)	148	Poraqueiba.guianensis	103
Riparian_chaparral_evergreen_(California)	54	Symphoricarpos_albus_var._laevigatus	6.80517	511.618		Lowland_trop_rainf_(Acarouany_FG)	148	Poraqueiba.guianensis	116.2
Riparian_chaparral_evergreen_(California)	54	Symphoricarpos_albus_var._laevigatus	5.2802	236.038		Lowland_trop_rainf_(Acarouany_FG)	148	Poraqueiba.guianensis	111.8
Riparian_chaparral_evergreen_(California)	54	Symphoricarpos_albus_var._laevigatus	6.19088	214.08		Lowland_trop_rainf_(Acarouany_FG)	148	Poraqueiba.guianensis	94.8
Riparian_chaparral_evergreen_(California)	54	Symphoricarpos_albus_var._laevigatus	4.9374	297.344		Lowland_trop_rainf_(Paracaou_FG)	150	Eperua_falcata	133.4
Riparian_chaparral_evergreen_(California)	54	Symphoricarpos_albus_var._laevigatus	5.36675	597.607		Lowland_trop_rainf_(Paracaou_FG)	150	Eperua_falcata	131.7
Riparian_chaparral_evergreen_(California)	54	Symphoricarpos_albus_var._laevigatus	3.05975	673.943		Lowland_trop_rainf_(Paracaou_FG)	150	Eperua_falcata	142
Riparian_chaparral_evergreen_(California)	54	Symphoricarpos_albus_var._laevigatus	6.14325	220.663		Lowland_trop_rainf_(Paracaou_FG)	150	Eperua_falcata	103.3
Riparian_chaparral_evergreen_(California)	54	Symphoricarpos_albus_var._laevigatus	4.54725	495.748		Lowland_trop_rainf_(Paracaou_FG)	150	Eperua_falcata	134.4
Riparian_chaparral_evergreen_(California)	54	Symphoricarpos_mollis	18.111	420.418		Lowland_trop_rainf_(Paracaou_FG)	150	Eperua_falcata	142.4
Riparian_chaparral_evergreen_(California)	54	Symphoricarpos_mollis	5.19475	400.154		Lowland_trop_rainf_(Paracaou_FG)	150	Eperua_falcata	143.5
Riparian_chaparral_evergreen_(California)	54	Symphoricarpos_mollis	4.87417	976.642		Lowland_trop_rainf_(Paracaou_FG)	150	Eperua_falcata	120
Riparian_chaparral_evergreen_(California)	54	Symphoricarpos_mollis	3.954	402.034		Lowland_trop_rainf_(Paracaou_FG)	150	Eperua_falcata	126.3
Riparian_chaparral_evergreen_(California)	54	Symphoricarpos_mollis	4.148	406.182		Lowland_trop_rainf_(Paracaou_FG)	150	Eperua_falcata	176.6
Riparian_chaparral_evergreen_(California)	54	Symphoricarpos_mollis	5.7648	393.022		Lowland_trop_rainf_(Paracaou_FG)	150	Eperua_falcata	118
Riparian_chaparral_evergreen_(California)	54	Symphoricarpos_mollis	5.362	229.398		Lowland_trop_rainf_(Paracaou_FG)	150	Eperua_grandiflora	98.4
Riparian_chaparral_evergreen_(California)	54	Symphoricarpos_mollis	2.9275	254.328		Lowland_trop_rainf_(Paracaou_FG)	150	Eperua_grandiflora	76.1
Riparian_chaparral_evergreen_(California)	54	Symphoricarpos_mollis	3.0476	271.694		Lowland_trop_rainf_(Paracaou_FG)	150	Eperua_grandiflora	98.3
Riparian_chaparral_evergreen_(California)	54	Symphoricarpos_mollis	5.538	387.99		Lowland_trop_rainf_(Paracaou_FG)	150	Eperua_grandiflora	127.6
Riparian_chaparral_evergreen_(California)	54	Symphoricarpos_mollis	5.964	304.307		Lowland_trop_rainf_(Paracaou_FG)	150	Eperua_grandiflora	86.8
Riparian_chaparral_evergreen_(California)	54	Symphoricarpos_mollis	2.243	233.992		Lowland_trop_rainf_(Paracaou_FG)	150	Eperua_grandiflora	65.4
Riparian_chaparral_evergreen_(California)	54	Symphoricarpos_mollis	2.63009	337.169		Lowland_trop_rainf_(Paracaou_FG)	150	Eperua_grandiflora	77.5
Riparian_chaparral_evergreen_(California)	54	Symphoricarpos_mollis	2.3504	338.604		Lowland_trop_rainf_(Paracaou_FG)	150	Eperua_grandiflora	109.8
Riparian_chaparral_evergreen_(California)	54	Symphoricarpos_mollis	2.82675	417.695		Lowland_trop_rainf_(Paracaou_FG)	150	Eperua_grandiflora	115.6
Riparian_chaparral_evergreen_(California)	54	Symphoricarpos_mollis	4.00833	282.651		Lowland_trop_rainf_(Paracaou_FG)	150	Eperua_grandiflora	106.5
Riparian_chaparral_evergreen_(California)	54	Symphoricarpos_mollis	4.11533	323.61		Lowland_trop_rainf_(Paracaou_FG)	150	Gustavia_hexapetala	117.1
Riparian_chaparral_evergreen_(California)	54	Symphoricarpos_mollis	2.94844	253.037		Lowland_trop_rainf_(Paracaou_FG)	150	Gustavia_hexapetala	166.5
Riparian_chaparral_evergreen_(California)	54	Symphoricarpos_mollis	3.98225	250.94		Lowland_trop_rainf_(Paracaou_FG)	150	Gustavia_hexapetala	88.1
Riparian_chaparral_evergreen_(California)	54	Symphoricarpos_mollis	5.52317	257.385		Lowland_trop_rainf_(Paracaou_FG)	150	Gustavia_hexapetala	77
Riparian_chaparral_evergreen_(California)	54	Symphoricarpos_mollis	4.1485	287.008		Lowland_trop_rainf_(Paracaou_FG)	150	Gustavia_hexapetala	109.7
Riparian_chaparral_evergreen_(California)	54	Symphoricarpos_mollis	2.2546	339.357		Lowland_trop_rainf_(Paracaou_FG)	150	Gustavia_hexapetala	154.2
Riparian_chaparral_evergreen_(California)	54	Symphoricarpos_mollis	3.64433	249.87		Lowland_trop_rainf_(Paracaou_FG)	150	Gustavia_hexapetala	97.9
Riparian_chaparral_evergreen_(California)	54	Symphoricarpos_mollis	3.06186	437.801		Lowland_trop_rainf_(Paracaou_FG)	150	Gustavia_hexapetala	136.5
Riparian_chaparral_evergreen_(California)	54	Symphoricarpos_mollis	9.2535	660.836		Lowland_trop_rainf_(Paracaou_FG)	150	Gustavia_hexapetala	163.7
Riparian_chaparral_evergreen_(California)	54	Symphoricarpos_mollis	8.96483	326.654		Lowland_trop_rainf_(Paracaou_FG)	150	Gustavia_hexapetala	136.9
Riparian_chaparral_evergreen_(California)	54	Toxicodendron_diversilobum	13.8656	NA		Lowland_trop_rainf_(Paracaou_FG)	150	Gustavia_hexapetala	118.2
Riparian_chaparral_evergreen_(California)	54	Toxicodendron_diversilobum	25.7111	NA		Lowland_trop_rainf_(Paracaou_FG)	150	Gustavia_hexapetala	123.2
Riparian_chaparral_evergreen_(California)	54	Toxicodendron_diversilobum	7.03133	NA		Lowland_trop_rainf_(Paracaou_FG)	150	Gustavia_hexapetala	128.4
Riparian_chaparral_evergreen_(California)	54	Toxicodendron_diversilobum	8.86	NA		Lowland_trop_rainf_(Paracaou_FG)	150	Gustavia_hexapetala	156.3
Riparian_chaparral_evergreen_(California)	54	Toxicodendron_diversilobum	6.32083	NA		Lowland_trop_rainf_(Paracaou_FG)	150	Gustavia_hexapetala	136.8
Riparian_chaparral_evergreen_(California)	54	Toxicodendron_diversilobum	8.825	NA		Lowland_trop_rainf_(Paracaou_FG)	150	Gustavia_hexapetala	156.8
Riparian_chaparral_evergreen_(California)	54	Toxicodendron_diversilobum	9.87267	NA		Lowland_trop_rainf_(Paracaou_FG)	150	Gustavia_hexapetala	129
Riparian_chaparral_evergreen_(California)	54	Toxicodendron_diversilobum	8.85167	NA		Lowland_trop_rainf_(Paracaou_FG)	150	Gustavia_hexapetala	120
Riparian_chaparral_evergreen_(California)	54	Toxicodendron_diversilobum	5.56833	NA		Lowland_trop_rainf_(Paracaou_FG)	150	Gustavia_hexapetala	149.3
Riparian_chaparral_evergreen_(California)	54	Toxicodendron_diversilobum	4.92333	NA		Lowland_trop_rainf_(Paracaou_FG)	150	Gustavia_hexapetala	130
Riparian_chaparral_evergreen_(California)	54	Toxicodendron_diversilobum	5.57667	NA		Lowland_trop_rainf_(Paracaou_FG)	150	Gustavia_hexapetala	141.3
Riparian_chaparral_evergreen_(California)	54	Toxicodendron_diversilobum	5.57667	NA		Lowland_trop_rainf_(Paracaou_FG)	150	Gustavia_hexapetala	142
Riparian_chaparral_evergreen_(California)	54	Toxicodendron_diversilobum	7.5075	NA		Lowland_trop_rainf_(Paracaou_FG)	150	Gustavia_hexapetala	166.8
Riparian_chaparral_evergreen_(California)	54	Toxicodendron_diversilobum	16.9783	NA		Lowland_trop_rainf_(Paracaou_FG)	150	Iryanthera_hostmannii	83.8
Riparian_chaparral_evergreen_(California)	54	Toxicodendron_diversilobum	17.961	NA		Lowland_trop_rainf_(Paracaou_FG)	150	Iryanthera_hostmannii	136
Riparian_chaparral_evergreen_(California)	54	Toxicodendron_diversilobum	11.7767	NA		Lowland_trop_rainf_(Paracaou_FG)	150	Iryanthera_hostmannii	91.4
Riparian_chaparral_evergreen_(California)	54	Toxicodendron_diversilobum	13.8067	NA		Lowland_trop_rainf_(Paracaou_FG)	150	Iryanthera_hostmannii	95.7
Riparian_chaparral_evergreen_(California)	54	Umbellularia_californica	13.8144	NA		Lowland_trop_rainf_(Paracaou_FG)	150	Iryanthera_hostmannii	116.4
Riparian_chaparral_evergreen_(California)	54	Umbellularia_californica	15.5323	NA		Lowland_trop_rainf_(Paracaou_FG)	150	Iryanthera_hostmannii	94.9
Riparian_chaparral_evergreen_(California)	54	Umbellularia_californica	18.5595	107.164		Lowland_trop_rainf_(Paracaou_FG)	150	Iryanthera_hostmannii	106.5
Riparian_chaparral_evergreen_(California)	54	Umbellularia_californica	24.2373	109.225		Lowland_trop_rainf_(Paracaou_FG)	150	Iryanthera_hostmannii	94
Riparian_chaparral_evergreen_(California)	54	Umbellularia_californica	23.2512	101.28		Lowland_trop_rainf_(Paracaou_FG)	150	Iryanthera_hostmannii	113.8
Riparian_chaparral_evergreen_(California)	54	Umbellularia_californica	15.3735	104.953		Lowland_trop_rainf_(Paracaou_FG)	150	Iryanthera_hostmannii	127.2
Riparian_chaparral_evergreen_(California)	54	Umbellularia_californica	23.5572	108.343		Lowland_trop_rainf_(Paracaou_FG)	150	Iryanthera_hostmannii	114.2
Riparian_chaparral_evergreen_(California)	54	Umbellularia_californica	23.988	99.9148		Lowland_trop_rainf_(Paracaou_FG)	150	Iryanthera_hostmannii	98.8
Riparian_chaparral_evergreen_(California)	54	Umbellularia_californica	13.6843	106.886		Lowland_trop_rainf_(Paracaou_FG)	150	Iryanthera_sagotiana	132.1
Riparian_chaparral_evergreen_(California)	54	Umbellularia_californica	15.2393	86.4356		Lowland_trop_rainf_(Paracaou_FG)	150	Iryanthera_sagotiana	125.8
Riparian_chaparral_evergreen_(California)	54	Umbellularia_californica	15.5186	94.5412		Lowland_trop_rainf_(Paracaou_FG)	150	Iryanthera_sagotiana	98.5
Riparian_chaparral_evergreen_(California)	54	Umbellularia_californica	18.0933	110.423		Lowland_trop_rainf_(Paracaou_FG)	150	Iryanthera_sagotiana	108.2
Riparian_chaparral_evergreen_(California)	54	Umbellularia_californica	14.8839	113.401		Lowland_trop_rainf_(Paracaou_FG)	150	Iryanthera_sagotiana	108.4
Riparian_chaparral_evergreen_(California)	54	Umbellularia_californica	12.5567	96.7154		Lowland_trop_rainf_(Paracaou_FG)	150	Iryanthera_sagotiana	85.6
Riparian_chaparral_evergreen_(California)	54	Umbellularia_californica	14.6324	129.13		Lowland_trop_rainf_(Paracaou_FG)	150	Iryanthera_sagotiana	139.5
Riparian_chaparral_evergreen_(California)	54	Umbellularia_californica	27.374	126.601		Lowland_trop_rainf_(Paracaou_FG)	150	Iryanthera_sagotiana	129.5
Riparian_chaparral_evergreen_(California)	54	Umbellularia_californica	23.7748	113.885		Lowland_trop_rainf_(Paracaou_FG)	150	Iryanthera_sagotiana	114.8
Riparian_chaparral_evergreen_(California)	54	Umbellularia_californica	11.4258	128.536		Lowland_trop_rainf_(Paracaou_FG)	150	Iryanthera_sagotiana	103.2
Riparian_chaparral_evergreen_(California)	54	Umbellularia_californica	8.99725	101.83		Lowland_trop_rainf_(Paracaou_FG)	150	Iryanthera_sagotiana	119.7
Riparian_chaparral_evergreen_(California)	54	Umbellularia_californica	10.608	125.255		Lowland_trop_rainf_(Paracaou_FG)	150	Iryanthera_sagotiana	127.4
Riparian_chaparral_evergreen_(California)	54	Umbellularia_californica	13.133	92.7567		Lowland_trop_rainf_(Paracaou_FG)	150	Iryanthera_sagotiana	127.6
Riparian_chaparral_evergreen_(California)	54	Umbellularia_californica	17.4829	93.8641		Lowland_trop_rainf_(Paracaou_FG)	150	Iryanthera_sagotiana	86.9
Riparian_chaparral_evergreen_(California)	54	Umbellularia_californica	13.27	77.275		Lowland_trop_rainf_(Paracaou_FG)	150	Lecythis_persistens	61.6
Riparian_chaparral_evergreen_(California)	54	Umbellularia_californica	14.273	104.829		Lowland_trop_rainf_(Paracaou_FG)	150	Lecythis_persistens	61.5
Riparian_chaparral_evergreen_(California)	54	Umbellularia_californica	15.3595	136.686		Lowland_trop_rainf_(Paracaou_FG)	150	Lecythis_persistens	54.9
Riparian_chaparral_evergreen_(California)	54	Umbellularia_californica	21.9186	103.988		Lowland_trop_rainf_(Paracaou_FG)	150	Lecythis_persistens	96.9
Riparian_chaparral_evergreen_(California)	54	Umbellularia_californica	14.06	147.07		Lowland_trop_rainf_(Paracaou_FG)	150	Lecythis_persistens	76.1
Riparian_chaparral_evergreen_(California)	54	Umbellularia_californica	15.206	118.582		Lowland_trop_rainf_(Paracaou_FG)	150	Lecythis_persistens	69.8
Riparian_chaparral_evergreen_(California)	54	Umbellularia_californica	17.9267	116.209		Lowland_trop_rainf_(Paracaou_FG)	150	Lecythis_persistens	61.5
Riparian_chaparral_evergreen_(California)	54	Umbellularia_californica	11.182	98.5091		Lowland_trop_rainf_(Paracaou_FG)	150	Lecythis_persistens	79.8
Lowland_trop_rainf_(Acarouany_FG)	148	Protium.gallicum	15.5	145		Lowland_trop_rainf_(Paracaou_FG)	150	Lecythis_persistens	56.8
Lowland_trop_rainf_(Acarouany_FG)	148	Protium.gallicum	17.9	131.4		Lowland_trop_rainf_(Paracaou_FG)	150	Lecythis_persistens	67
Lowland_trop_rainf_(Acarouany_FG)	148	Protium.gallicum	12.7	131		Lowland_trop_rainf_(Paracaou_FG)	150	Lecythis_persistens	72.5
Lowland_trop_rainf_(Acarouany_FG)	148	Protium.gallicum	19.8	159.5		Lowland_trop_rainf_(Paracaou_FG)	150	Lecythis_persistens	45.6
Lowland_trop_rainf_(Acarouany_FG)	148	Protium.gallicum	10.5	151		Lowland_trop_rainf_(Paracaou_FG)	150	Lecythis_persistens	67.7
Lowland_trop_rainf_(Acarouany_FG)	148	Protium.gallicum	18.1	176.3		Lowland_trop_rainf_(Paracaou_FG)	150	Lecythis_persistens	49.5
Lowland_trop_rainf_(Acarouany_FG)	148	Protium.gallicum	10.7	155.8		Lowland_trop_rainf_(Paracaou_FG)	150	Lecythis_persistens	78.3
Lowland_trop_rainf_(Acarouany_FG)	148	Protium.gallicum	20.9	157.9		Lowland_trop_rainf_(Paracaou_FG)	150	Lecythis_persistens	86.8
Lowland_trop_rainf_(Acarouany_FG)	148	Protium.gallicum	20.1	99.3		Lowland_trop_rainf_(Paracaou_FG)	150	Oxandra_asbeckii	104.6
Lowland_trop_rainf_(Acarouany_FG)	148	Protium.gallicum	18.9	117.9		Lowland_trop_rainf_(Paracaou_FG)	150	Oxandra_asbeckii	102
Lowland_trop_rainf_(Acarouany_FG)	148	Protium.gallicum	15.4	140.1		Lowland_trop_rainf_(Paracaou_FG)	150	Oxandra_asbeckii	99.2
Lowland_trop_rainf_(Acarouany_FG)	148	Protium.gallicum	16.9	153.5		Lowland_trop_rainf_(Paracaou_FG)	150	Oxandra_asbeckii	99.3
Lowland_trop_rainf_(Acarouany_FG)	148	Protium.gallicum	14	182.2		Lowland_trop_rainf_(Paracaou_FG)	150	Oxandra_asbeckii	120.3
Lowland_trop_rainf_(Acarouany_FG)	148	Protium.gallicum	33.3	204.5		Lowland_trop_rainf_(Paracaou_FG)	150	Oxandra_asbeckii	97
Lowland_trop_rainf_(Acarouany_FG)	148	Protium.gallicum	9.2	108.3		Lowland_trop_rainf_(Paracaou_FG)	150	Oxandra_asbeckii	105.3
Lowland_trop_rainf_(Acarouany_FG)	148	Protium.gallicum	15.8	145.1		Lowland_trop_rainf_(Paracaou_FG)	150	Oxandra_asbeckii	123.8
Lowland_trop_rainf_(Acarouany_FG)	148	Protium.gallicum	19.3	133.9		Lowland_trop_rainf_(Paracaou_FG)	150	Oxandra_asbeckii	101.5
Lowland_trop_rainf_(Acarouany_FG)	148	Protium.gallicum	16.4	163.8		Lowland_trop_rainf_(Paracaou_FG)	150	Oxandra_asbeckii	111.3
Lowland_trop_rainf_(Acarouany_FG)	148	Protium.gallicum	16.3	110.4		Lowland_trop_rainf_(Paracaou_FG)	150	Oxandra_asbeckii	104.3
Lowland_trop_rainf_(Acarouany_FG)	148	Protium.gallicum	17.5	156.1		Lowland_trop_rainf_(Paracaou_FG)	150	Oxandra_asbeckii	108
Lowland_trop_rainf_(Acarouany_FG)	148	Protium.gallicum	17.5	150.4		Lowland_trop_rainf_(Paracaou_FG)	150	Oxandra_asbeckii	117
Lowland_trop_rainf_(Acarouany_FG)	148	Protium.gallicum	16.8	135.8		Lowland_trop_rainf_(Paracaou_FG)	150	Oxandra_asbeckii	113.1
Lowland_trop_rainf_(Acarouany_FG)	148	Poraqueiba.guianensis	61.3	125.6		Lowland_trop_rainf_(Paracaou_FG)	150	Oxandra_asbeckii	99.5
Lowland_trop_rainf_(Acarouany_FG)	148	Poraqueiba.guianensis	69.4	112		Lowland_trop_rainf_(Paracaou_FG)	150	Oxandra_asbeckii	123.2
Lowland_trop_rainf_(Acarouany_FG)	148	Poraqueiba.guianensis	84.8	99.2		Lowland_trop_rainf_(Paracaou_FG)	150	Oxandra_asbeckii	101.1
Lowland_trop_rainf_(Acarouany_FG)	148	Poraqueiba.guianensis	85.5	90.5		Lowland_trop_rainf_(Paracaou_FG)	150	Oxandra_asbeckii	98.5
Lowland_trop_rainf_(Acarouany_FG)	148	Poraqueiba.guianensis	71.4	91.4		Lowland_trop_rainf_(Paracaou_FG)	150	Oxandra_asbeckii	100
Lowland_trop_rainf_(Acarouany_FG)	148	Poraqueiba.guianensis	79.4	102.3		Lowland_trop_rainf_(Paracaou_FG)	150	Oxandra_asbeckii	113.3
Lowland_trop_rainf_(Acarouany_FG)	148	Poraqueiba.guianensis	70.2	102.3		Lowland_trop_rainf_(Paracaou_FG)	150	Oxandra_asbeckii	85.9
Lowland_trop_rainf_(Acarouany_FG)	148	Poraqueiba.guianensis	64.6	103.6		Lowland_trop_rainf_(Paracaou_FG)	150	Oxandra_asbeckii	102.2
Lowland_trop_rainf_(Acarouany_FG)	148	Poraqueiba.guianensis	78.2	94.5		Lowland_trop_rainf_(Paracaou_FG)	150	Oxandra_asbeckii	118.9
Lowland_trop_rainf_(Acarouany_FG)	148	Poraqueiba.guianensis	57.7	96.2		Lowland_trop_rainf_(Paracaou_FG)	150	Oxandra_asbeckii	114.1
Lowland_trop_rainf_(Acarouany_FG)	148	Poraqueiba.guianensis	56.1	82.9		Lowland_trop_rainf_(Paracaou_FG)	150	Oxandra_asbeckii	113.4
Lowland_trop_rainf_(Acarouany_FG)	148	Poraqueiba.guianensis	62	109		Lowland_trop_rainf_(Paracaou_FG)	150	Oxandra_asbeckii	106.3
Lowland_trop_rainf_(Acarouany_FG)	148	Poraqueiba.guianensis	69.3	103		Lowland_trop_rainf_(Paracaou_FG)	150	Oxandra_asbeckii	116.1
Lowland_trop_rainf_(Acarouany_FG)	148	Poraqueiba.guianensis	76	116.2		Lowland_trop_rainf_(Paracaou_FG)	150	Oxandra_asbeckii	103.6
Lowland_trop_rainf_(Acarouany_FG)	148	Poraqueiba.guianensis	91.7	111.8		Lowland_trop_rainf_(Paracaou_FG)	150	Oxandra_asbeckii	94.9
Lowland_trop_rainf_(Acarouany_FG)	148	Poraqueiba.guianensis	56.3	94.8		Lowland_trop_rainf_(Paracaou_FG)	150	Oxandra_asbeckii	91.3
Lowland_trop_rainf_(Paracaou_FG)	150	Eperua_falcata	55.7	133.4		Lowland_trop_rainf_(Paracaou_FG)	150	Oxandra_asbeckii	126.2
Lowland_trop_rainf_(Paracaou_FG)	150	Eperua_falcata	44.6	131.7		Lowland_trop_rainf_(Paracaou_FG)	150	Oxandra_asbeckii	108.5
Lowland_trop_rainf_(Paracaou_FG)	150	Eperua_falcata	43.8	142		Lowland_trop_rainf_(Paracaou_FG)	150	Oxandra_asbeckii	102.5
Lowland_trop_rainf_(Paracaou_FG)	150	Eperua_falcata	38.7	103.3		Lowland_trop_rainf_(Paracaou_FG)	150	Oxandra_asbeckii	115.1
Lowland_trop_rainf_(Paracaou_FG)	150	Eperua_falcata	19.9	134.4		Lowland_trop_rainf_(Paracaou_FG)	150	Oxandra_asbeckii	113.6
Lowland_trop_rainf_(Paracaou_FG)	150	Eperua_falcata	42.3	142.4		Lowland_trop_rainf_(Paracaou_FG)	150	Oxandra_asbeckii	90.1
Lowland_trop_rainf_(Paracaou_FG)	150	Eperua_falcata	36.5	143.5		Lowland_trop_rainf_(Paracaou_FG)	150	Oxandra_asbeckii	129.8
Lowland_trop_rainf_(Paracaou_FG)	150	Eperua_falcata	41.8	120		Lowland_trop_rainf_(Paracaou_FG)	150	Oxandra_asbeckii	124
Lowland_trop_rainf_(Paracaou_FG)	150	Eperua_falcata	45.7	126.3		Lowland_trop_rainf_(Paracaou_FG)	150	Oxandra_asbeckii	135.5
Lowland_trop_rainf_(Paracaou_FG)	150	Eperua_falcata	31.1	176.6		Lowland_trop_rainf_(Paracaou_FG)	150	Pogonophora_schomburgkiana	126.2
Lowland_trop_rainf_(Paracaou_FG)	150	Eperua_falcata	56	118		Lowland_trop_rainf_(Paracaou_FG)	150	Pogonophora_schomburgkiana	131.4
Lowland_trop_rainf_(Paracaou_FG)	150	Eperua_grandiflora	47.1	98.4		Lowland_trop_rainf_(Paracaou_FG)	150	Pogonophora_schomburgkiana	100.8
Lowland_trop_rainf_(Paracaou_FG)	150	Eperua_grandiflora	17.4	76.1		Lowland_trop_rainf_(Paracaou_FG)	150	Pogonophora_schomburgkiana	167.6
Lowland_trop_rainf_(Paracaou_FG)	150	Eperua_grandiflora	29.7	98.3		Lowland_trop_rainf_(Paracaou_FG)	150	Pogonophora_schomburgkiana	212.6
Lowland_trop_rainf_(Paracaou_FG)	150	Eperua_grandiflora	63.7	127.6		Lowland_trop_rainf_(Paracaou_FG)	150	Pogonophora_schomburgkiana	124.6
Lowland_trop_rainf_(Paracaou_FG)	150	Eperua_grandiflora	46.2	86.8		Lowland_trop_rainf_(Paracaou_FG)	150	Pogonophora_schomburgkiana	85
Lowland_trop_rainf_(Paracaou_FG)	150	Eperua_grandiflora	41.5	65.4		Lowland_trop_rainf_(Paracaou_FG)	150	Pogonophora_schomburgkiana	126.9
Lowland_trop_rainf_(Paracaou_FG)	150	Eperua_grandiflora	46	77.5		Lowland_trop_rainf_(Paracaou_FG)	150	Pogonophora_schomburgkiana	132.8
Lowland_trop_rainf_(Paracaou_FG)	150	Eperua_grandiflora	35.1	109.8		Lowland_trop_rainf_(Paracaou_FG)	150	Pogonophora_schomburgkiana	150.2
Lowland_trop_rainf_(Paracaou_FG)	150	Eperua_grandiflora	74.5	115.6		Lowland_trop_rainf_(Paracaou_FG)	150	Pogonophora_schomburgkiana	133.9
Lowland_trop_rainf_(Paracaou_FG)	150	Eperua_grandiflora	46.7	106.5		Lowland_trop_rainf_(Paracaou_FG)	150	Pogonophora_schomburgkiana	94.4
Lowland_trop_rainf_(Paracaou_FG)	150	Gustavia_hexapetala	36.1	117.1		Lowland_trop_rainf_(Paracaou_FG)	150	Pogonophora_schomburgkiana	116.4
Lowland_trop_rainf_(Paracaou_FG)	150	Gustavia_hexapetala	80.6	166.5		Lowland_trop_rainf_(Paracaou_FG)	150	Pogonophora_schomburgkiana	129.2
Lowland_trop_rainf_(Paracaou_FG)	150	Gustavia_hexapetala	64.3	88.1		Lowland_trop_rainf_(Paracaou_FG)	150	Pogonophora_schomburgkiana	134.3
Lowland_trop_rainf_(Paracaou_FG)	150	Gustavia_hexapetala	55.3	77		Lowland_trop_rainf_(Paracaou_FG)	150	Pogonophora_schomburgkiana	113.9
Lowland_trop_rainf_(Paracaou_FG)	150	Gustavia_hexapetala	92.8	109.7		Lowland_trop_rainf_(Paracaou_FG)	150	Pogonophora_schomburgkiana	138.9
Lowland_trop_rainf_(Paracaou_FG)	150	Gustavia_hexapetala	49.6	154.2		Lowland_trop_rainf_(Paracaou_FG)	150	Pogonophora_schomburgkiana	148.2
Lowland_trop_rainf_(Paracaou_FG)	150	Gustavia_hexapetala	51	97.9		Lowland_trop_rainf_(Paracaou_FG)	150	Pogonophora_schomburgkiana	126.4
Lowland_trop_rainf_(Paracaou_FG)	150	Gustavia_hexapetala	53.1	136.5		Lowland_trop_rainf_(Paracaou_FG)	150	Pogonophora_schomburgkiana	141.4
Lowland_trop_rainf_(Paracaou_FG)	150	Gustavia_hexapetala	75.1	163.7		Lowland_trop_rainf_(Paracaou_FG)	150	Pogonophora_schomburgkiana	129.1
Lowland_trop_rainf_(Paracaou_FG)	150	Gustavia_hexapetala	49.8	136.9		Lowland_trop_rainf_(Paracaou_FG)	150	Pogonophora_schomburgkiana	151.7
Lowland_trop_rainf_(Paracaou_FG)	150	Gustavia_hexapetala	65.6	118.2		Lowland_trop_rainf_(Paracaou_FG)	150	Pogonophora_schomburgkiana	116.3
Lowland_trop_rainf_(Paracaou_FG)	150	Gustavia_hexapetala	71.6	123.2		Lowland_trop_rainf_(Paracaou_FG)	150	Pogonophora_schomburgkiana	120.4
Lowland_trop_rainf_(Paracaou_FG)	150	Gustavia_hexapetala	71.5	128.4		Lowland_trop_rainf_(Paracaou_FG)	150	Rheedia_madruno	72.9
Lowland_trop_rainf_(Paracaou_FG)	150	Gustavia_hexapetala	158	156.3		Lowland_trop_rainf_(Paracaou_FG)	150	Rheedia_madruno	57.4
Lowland_trop_rainf_(Paracaou_FG)	150	Gustavia_hexapetala	85.7	136.8		Lowland_trop_rainf_(Paracaou_FG)	150	Rheedia_madruno	87.8
Lowland_trop_rainf_(Paracaou_FG)	150	Gustavia_hexapetala	101.2	156.8		Lowland_trop_rainf_(Paracaou_FG)	150	Rheedia_madruno	71.4
Lowland_trop_rainf_(Paracaou_FG)	150	Gustavia_hexapetala	64.4	129		Lowland_trop_rainf_(Paracaou_FG)	150	Rheedia_madruno	94
Lowland_trop_rainf_(Paracaou_FG)	150	Gustavia_hexapetala	49.7	120		Lowland_trop_rainf_(Paracaou_FG)	150	Rheedia_madruno	81.1
Lowland_trop_rainf_(Paracaou_FG)	150	Gustavia_hexapetala	55.8	149.3		Lowland_trop_rainf_(Paracaou_FG)	150	Rheedia_madruno	72
Lowland_trop_rainf_(Paracaou_FG)	150	Gustavia_hexapetala	90	130		Lowland_trop_rainf_(Paracaou_FG)	150	Rheedia_madruno	82.2
Lowland_trop_rainf_(Paracaou_FG)	150	Gustavia_hexapetala	61.6	141.3		Lowland_trop_rainf_(Paracaou_FG)	150	Rheedia_madruno	65.5
Lowland_trop_rainf_(Paracaou_FG)	150	Gustavia_hexapetala	44.1	142		Lowland_trop_rainf_(Paracaou_FG)	150	Rheedia_madruno	78.6
Lowland_trop_rainf_(Paracaou_FG)	150	Gustavia_hexapetala	119.4	166.8		Lowland_trop_rainf_(Paracaou_FG)	150	Sandwithia_guianensis	163.8
Lowland_trop_rainf_(Paracaou_FG)	150	Iryanthera_hostmannii	91.2	83.8		Lowland_trop_rainf_(Paracaou_FG)	150	Sandwithia_guianensis	163.5
Lowland_trop_rainf_(Paracaou_FG)	150	Iryanthera_hostmannii	93.6	136		Lowland_trop_rainf_(Paracaou_FG)	150	Sandwithia_guianensis	178.4
Lowland_trop_rainf_(Paracaou_FG)	150	Iryanthera_hostmannii	64.7	91.4		Lowland_trop_rainf_(Paracaou_FG)	150	Sandwithia_guianensis	158.9
Lowland_trop_rainf_(Paracaou_FG)	150	Iryanthera_hostmannii	44.8	95.7		Lowland_trop_rainf_(Paracaou_FG)	150	Sandwithia_guianensis	132.9
Lowland_trop_rainf_(Paracaou_FG)	150	Iryanthera_hostmannii	65.1	116.4		Lowland_trop_rainf_(Paracaou_FG)	150	Sandwithia_guianensis	143.4
Lowland_trop_rainf_(Paracaou_FG)	150	Iryanthera_hostmannii	58.5	94.9		Lowland_trop_rainf_(Paracaou_FG)	150	Sandwithia_guianensis	176.8
Lowland_trop_rainf_(Paracaou_FG)	150	Iryanthera_hostmannii	80.4	106.5		Lowland_trop_rainf_(Paracaou_FG)	150	Sandwithia_guianensis	162.5
Lowland_trop_rainf_(Paracaou_FG)	150	Iryanthera_hostmannii	30.3	94		Lowland_trop_rainf_(Paracaou_FG)	150	Sandwithia_guianensis	176.6
Lowland_trop_rainf_(Paracaou_FG)	150	Iryanthera_hostmannii	75.7	113.8		Lowland_trop_rainf_(Paracaou_FG)	150	Sandwithia_guianensis	109.5
Lowland_trop_rainf_(Paracaou_FG)	150	Iryanthera_hostmannii	48.5	127.2		Lowland_trop_rainf_(Paracaou_FG)	150	Sandwithia_guianensis	160.9
Lowland_trop_rainf_(Paracaou_FG)	150	Iryanthera_hostmannii	60	114.2		Lowland_trop_rainf_(Paracaou_FG)	150	Sandwithia_guianensis	162.2
Lowland_trop_rainf_(Paracaou_FG)	150	Iryanthera_hostmannii	88.9	98.8		Lowland_trop_rainf_(Paracaou_FG)	150	Sandwithia_guianensis	144.3
Lowland_trop_rainf_(Paracaou_FG)	150	Iryanthera_sagotiana	32.2	132.1		Lowland_trop_rainf_(Paracaou_FG)	150	Sandwithia_guianensis	118.3
Lowland_trop_rainf_(Paracaou_FG)	150	Iryanthera_sagotiana	28.5	125.8		Lowland_trop_rainf_(Paracaou_FG)	150	Sandwithia_guianensis	126
Lowland_trop_rainf_(Paracaou_FG)	150	Iryanthera_sagotiana	35.2	98.5		Lowland_trop_rainf_(Paracaou_FG)	150	Sandwithia_guianensis	166.5
Lowland_trop_rainf_(Paracaou_FG)	150	Iryanthera_sagotiana	39.8	108.2		Lowland_trop_rainf_(Paracaou_FG)	150	Sandwithia_guianensis	158.8
Lowland_trop_rainf_(Paracaou_FG)	150	Iryanthera_sagotiana	36.4	108.4		Lowland_trop_rainf_(Paracaou_FG)	150	Sandwithia_guianensis	146.7
Lowland_trop_rainf_(Paracaou_FG)	150	Iryanthera_sagotiana	49.9	85.6		Lowland_trop_rainf_(Paracaou_FG)	150	Sandwithia_guianensis	143.2
Lowland_trop_rainf_(Paracaou_FG)	150	Iryanthera_sagotiana	26.5	139.5		Lowland_trop_rainf_(Paracaou_FG)	150	Sandwithia_guianensis	186.8
Lowland_trop_rainf_(Paracaou_FG)	150	Iryanthera_sagotiana	41.6	129.5		Lowland_trop_rainf_(Paracaou_FG)	150	Sandwithia_guianensis	168.9
Lowland_trop_rainf_(Paracaou_FG)	150	Iryanthera_sagotiana	32.4	114.8		Lowland_trop_rainf_(Paracaou_FG)	150	Sandwithia_guianensis	163.1
Lowland_trop_rainf_(Paracaou_FG)	150	Iryanthera_sagotiana	28.1	103.2		Lowland_trop_rainf_(Paracaou_FG)	150	Sandwithia_guianensis	144.4
Lowland_trop_rainf_(Paracaou_FG)	150	Iryanthera_sagotiana	53.7	119.7		Lowland_trop_rainf_(Paracaou_FG)	150	Sandwithia_guianensis	193.9
Lowland_trop_rainf_(Paracaou_FG)	150	Iryanthera_sagotiana	75.4	127.4		Lowland_trop_rainf_(Paracaou_FG)	150	Sandwithia_guianensis	122.4
Lowland_trop_rainf_(Paracaou_FG)	150	Iryanthera_sagotiana	35.7	127.6		Lowland_trop_rainf_(Paracaou_FG)	150	Sandwithia_guianensis	153.5
Lowland_trop_rainf_(Paracaou_FG)	150	Iryanthera_sagotiana	36	86.9		Lowland_trop_rainf_(Paracaou_FG)	150	Sandwithia_guianensis	144.1
Lowland_trop_rainf_(Paracaou_FG)	150	Lecythis_persistens	72.1	61.6		Lowland_trop_rainf_(Paracaou_FG)	150	Sandwithia_guianensis	154.7
Lowland_trop_rainf_(Paracaou_FG)	150	Lecythis_persistens	114.5	61.5		Lowland_trop_rainf_(Paracaou_FG)	150	Sandwithia_guianensis	194.3
Lowland_trop_rainf_(Paracaou_FG)	150	Lecythis_persistens	85.5	54.9		Lowland_trop_rainf_(Paracaou_FG)	150	Sandwithia_guianensis	99.1
Lowland_trop_rainf_(Paracaou_FG)	150	Lecythis_persistens	111	96.9		Lowland_trop_rainf_(Paracaou_FG)	150	Sandwithia_guianensis	154.3
Lowland_trop_rainf_(Paracaou_FG)	150	Lecythis_persistens	112.1	76.1		Lowland_trop_rainf_(Paracaou_FG)	150	Sandwithia_guianensis	149.3
Lowland_trop_rainf_(Paracaou_FG)	150	Lecythis_persistens	142.1	69.8		Lowland_trop_rainf_(Paracaou_FG)	150	Sandwithia_guianensis	146.2
Lowland_trop_rainf_(Paracaou_FG)	150	Lecythis_persistens	55.2	61.5		Lowland_trop_rainf_(Paracaou_FG)	150	Sandwithia_guianensis	144.5
Lowland_trop_rainf_(Paracaou_FG)	150	Lecythis_persistens	95.2	79.8		Lowland_trop_rainf_(Paracaou_FG)	150	Sandwithia_guianensis	120.4
Lowland_trop_rainf_(Paracaou_FG)	150	Lecythis_persistens	115.3	56.8		Lowland_trop_rainf_(Paracaou_FG)	150	Sandwithia_guianensis	182.8
Lowland_trop_rainf_(Paracaou_FG)	150	Lecythis_persistens	153	67		Lowland_trop_rainf_(Paracaou_FG)	150	Sandwithia_guianensis	159.1
Lowland_trop_rainf_(Paracaou_FG)	150	Lecythis_persistens	126.1	72.5		Lowland_trop_rainf_(Paracaou_FG)	150	Tapura_capitulifera	68.5
Lowland_trop_rainf_(Paracaou_FG)	150	Lecythis_persistens	89	45.6		Lowland_trop_rainf_(Paracaou_FG)	150	Tapura_capitulifera	51.8
Lowland_trop_rainf_(Paracaou_FG)	150	Lecythis_persistens	139.8	67.7		Lowland_trop_rainf_(Paracaou_FG)	150	Tapura_capitulifera	63.3
Lowland_trop_rainf_(Paracaou_FG)	150	Lecythis_persistens	112.9	49.5		Lowland_trop_rainf_(Paracaou_FG)	150	Tapura_capitulifera	75.3
Lowland_trop_rainf_(Paracaou_FG)	150	Lecythis_persistens	133.4	78.3		Lowland_trop_rainf_(Paracaou_FG)	150	Tapura_capitulifera	67.2
Lowland_trop_rainf_(Paracaou_FG)	150	Lecythis_persistens	93.8	86.8		Lowland_trop_rainf_(Paracaou_FG)	150	Tapura_capitulifera	69.9
Lowland_trop_rainf_(Paracaou_FG)	150	Oxandra_asbeckii	17.6	104.6		Lowland_trop_rainf_(Paracaou_FG)	150	Tapura_capitulifera	67.2
Lowland_trop_rainf_(Paracaou_FG)	150	Oxandra_asbeckii	18.8	102		Lowland_trop_rainf_(Paracaou_FG)	150	Tapura_capitulifera	55.7
Lowland_trop_rainf_(Paracaou_FG)	150	Oxandra_asbeckii	17.6	99.2		Lowland_trop_rainf_(Paracaou_FG)	150	Tapura_capitulifera	75.9
Lowland_trop_rainf_(Paracaou_FG)	150	Oxandra_asbeckii	40.7	99.3		Lowland_trop_rainf_(Paracaou_FG)	150	Tapura_capitulifera	47
Lowland_trop_rainf_(Paracaou_FG)	150	Oxandra_asbeckii	28.2	120.3		Lowland_trop_rainf_(Paracaou_FG)	150	Tapura_capitulifera	82.4
Lowland_trop_rainf_(Paracaou_FG)	150	Oxandra_asbeckii	21.2	97		Lowland_trop_rainf_(Paracaou_FG)	150	Tapura_capitulifera	47.4
Lowland_trop_rainf_(Paracaou_FG)	150	Oxandra_asbeckii	19.9	105.3		Lowland_trop_rainf_(Paracaou_FG)	150	Tapura_capitulifera	72.5
Lowland_trop_rainf_(Paracaou_FG)	150	Oxandra_asbeckii	27.7	123.8		Lowland_trop_rainf_(Paracaou_FG)	150	Tapura_capitulifera	53.5
Lowland_trop_rainf_(Paracaou_FG)	150	Oxandra_asbeckii	24.8	101.5		Lowland_trop_rainf_(Paracaou_FG)	150	Tovomita_sp._B1	102.7
Lowland_trop_rainf_(Paracaou_FG)	150	Oxandra_asbeckii	14.2	111.3		Lowland_trop_rainf_(Paracaou_FG)	150	Tovomita_sp._B1	93.6
Lowland_trop_rainf_(Paracaou_FG)	150	Oxandra_asbeckii	31.8	104.3		Lowland_trop_rainf_(Paracaou_FG)	150	Tovomita_sp._B1	131.3
Lowland_trop_rainf_(Paracaou_FG)	150	Oxandra_asbeckii	27.1	108		Lowland_trop_rainf_(Paracaou_FG)	150	Tovomita_sp._B1	126.6
Lowland_trop_rainf_(Paracaou_FG)	150	Oxandra_asbeckii	22.3	117		Lowland_trop_rainf_(Paracaou_FG)	150	Tovomita_sp._B1	120.9
Lowland_trop_rainf_(Paracaou_FG)	150	Oxandra_asbeckii	26.5	113.1		Lowland_trop_rainf_(Paracaou_FG)	150	Tovomita_sp._B1	101.8
Lowland_trop_rainf_(Paracaou_FG)	150	Oxandra_asbeckii	27.3	99.5		Lowland_trop_rainf_(Paracaou_FG)	150	Tovomita_sp._B1	133.6
Lowland_trop_rainf_(Paracaou_FG)	150	Oxandra_asbeckii	19.7	123.2		Lowland_trop_rainf_(Paracaou_FG)	150	Tovomita_sp._B1	118
Lowland_trop_rainf_(Paracaou_FG)	150	Oxandra_asbeckii	17.8	101.1		Lowland_trop_rainf_(Paracaou_FG)	150	Tovomita_sp._B1	135.5
Lowland_trop_rainf_(Paracaou_FG)	150	Oxandra_asbeckii	26.7	98.5		Lowland_trop_rainf_(Paracaou_FG)	150	Tovomita_sp._B1	109.4
Lowland_trop_rainf_(Paracaou_FG)	150	Oxandra_asbeckii	24.4	100		Lowland_trop_rainf_(Paracaou_FG)	150	Tovomita_sp._B1	83.9
Lowland_trop_rainf_(Paracaou_FG)	150	Oxandra_asbeckii	26.1	113.3		Lowland_trop_rainf_(Paracaou_FG)	150	Tovomita_sp._B1	131.8
Lowland_trop_rainf_(Paracaou_FG)	150	Oxandra_asbeckii	16.8	85.9		Lowland_trop_rainf_(Paracaou_FG)	150	Tovomita_sp._B1	112.8
Lowland_trop_rainf_(Paracaou_FG)	150	Oxandra_asbeckii	22.2	102.2		Lowland_trop_rainf_(Paracaou_FG)	150	Tovomita_sp._B1	126
Lowland_trop_rainf_(Paracaou_FG)	150	Oxandra_asbeckii	27.4	118.9		Lowland_trop_rainf_(Paracaou_FG)	150	Tovomita_sp._B1	143.2
Lowland_trop_rainf_(Paracaou_FG)	150	Oxandra_asbeckii	25.7	114.1		Lowland_trop_rainf_(Paracaou_FG)	150	Tovomita_sp._B1	184.4
Lowland_trop_rainf_(Paracaou_FG)	150	Oxandra_asbeckii	14.1	113.4		Lowland_trop_rainf_(Paracaou_FG)	150	Tovomita_sp._B1	137.9
Lowland_trop_rainf_(Paracaou_FG)	150	Oxandra_asbeckii	19.6	106.3		Lowland_trop_rainf_(Paracaou_FG)	150	Tovomita_sp._B1	155.8
Lowland_trop_rainf_(Paracaou_FG)	150	Oxandra_asbeckii	29.6	116.1		Lowland_trop_rainf_(Paracaou_FG)	150	Tovomita_sp._B1	182.3
Lowland_trop_rainf_(Paracaou_FG)	150	Oxandra_asbeckii	42.1	103.6		Lowland_trop_rainf_(Paracaou_FG)	150	Tovomita_sp._B1	123.7
Lowland_trop_rainf_(Paracaou_FG)	150	Oxandra_asbeckii	19.1	94.9		Lowland_trop_rainf_(Paracaou_FG)	150	Tovomita_sp._B1	108.6
Lowland_trop_rainf_(Paracaou_FG)	150	Oxandra_asbeckii	17.2	91.3		Lowland_trop_rainf_(Paracaou_FG)	150	Tovomita_sp._B1	149.4
Lowland_trop_rainf_(Paracaou_FG)	150	Oxandra_asbeckii	16.4	126.2		Lowland_trop_rainf_(Paracaou_FG)	150	Tovomita_sp._B1	130.4
Lowland_trop_rainf_(Paracaou_FG)	150	Oxandra_asbeckii	24.6	108.5		Lowland_trop_rainf_(Paracaou_FG)	150	Tovomita_sp._B1	152.3
Lowland_trop_rainf_(Paracaou_FG)	150	Oxandra_asbeckii	31.5	102.5		Lowland_trop_rainf_(Paracaou_FG)	150	Tovomita_sp._B1	132.9
Lowland_trop_rainf_(Paracaou_FG)	150	Oxandra_asbeckii	22.6	115.1		Lowland_trop_rainf_(Paracaou_FG)	150	Tovomita_sp._B1	114.2
Lowland_trop_rainf_(Paracaou_FG)	150	Oxandra_asbeckii	28.6	113.6		Lowland_trop_rainf_(BAFOG_FG)	156	Protium.gallicum	136.1
Lowland_trop_rainf_(Paracaou_FG)	150	Oxandra_asbeckii	21	90.1		Lowland_trop_rainf_(BAFOG_FG)	156	Protium.gallicum	138.3
Lowland_trop_rainf_(Paracaou_FG)	150	Oxandra_asbeckii	23.4	129.8		Lowland_trop_rainf_(BAFOG_FG)	156	Protium.gallicum	130.6
Lowland_trop_rainf_(Paracaou_FG)	150	Oxandra_asbeckii	18.8	124		Lowland_trop_rainf_(BAFOG_FG)	156	Protium.gallicum	148.5
Lowland_trop_rainf_(Paracaou_FG)	150	Oxandra_asbeckii	25.3	135.5		Lowland_trop_rainf_(BAFOG_FG)	156	Protium.gallicum	137.1
Lowland_trop_rainf_(Paracaou_FG)	150	Pogonophora_schomburgkiana	17.8	126.2		Lowland_trop_rainf_(BAFOG_FG)	156	Protium.gallicum	124.9
Lowland_trop_rainf_(Paracaou_FG)	150	Pogonophora_schomburgkiana	35	131.4		Lowland_trop_rainf_(BAFOG_FG)	156	Protium.gallicum	120.3
Lowland_trop_rainf_(Paracaou_FG)	150	Pogonophora_schomburgkiana	37.9	100.8		Lowland_trop_rainf_(BAFOG_FG)	156	Protium.gallicum	117.3
Lowland_trop_rainf_(Paracaou_FG)	150	Pogonophora_schomburgkiana	24.1	167.6		Lowland_trop_rainf_(BAFOG_FG)	156	Protium.gallicum	171.2
Lowland_trop_rainf_(Paracaou_FG)	150	Pogonophora_schomburgkiana	65.2	212.6		Lowland_trop_rainf_(BAFOG_FG)	156	Protium.gallicum	118.2
Lowland_trop_rainf_(Paracaou_FG)	150	Pogonophora_schomburgkiana	49.6	124.6		Lowland_trop_rainf_(BAFOG_FG)	156	Protium.gallicum	122.1
Lowland_trop_rainf_(Paracaou_FG)	150	Pogonophora_schomburgkiana	15.7	85		Lowland_trop_rainf_(BAFOG_FG)	156	Protium.gallicum	155.1
Lowland_trop_rainf_(Paracaou_FG)	150	Pogonophora_schomburgkiana	27.7	126.9		Lowland_trop_rainf_(BAFOG_FG)	156	Protium.gallicum	148.4
Lowland_trop_rainf_(Paracaou_FG)	150	Pogonophora_schomburgkiana	66.3	132.8		Lowland_trop_rainf_(BAFOG_FG)	156	Protium.gallicum	169
Lowland_trop_rainf_(Paracaou_FG)	150	Pogonophora_schomburgkiana	64.2	150.2		Lowland_trop_rainf_(BAFOG_FG)	156	Protium.gallicum	172.1
Lowland_trop_rainf_(Paracaou_FG)	150	Pogonophora_schomburgkiana	44.9	133.9		Lowland_trop_rainf_(BAFOG_FG)	156	Protium.gallicum	136.4
Lowland_trop_rainf_(Paracaou_FG)	150	Pogonophora_schomburgkiana	33.5	94.4		Lowland_trop_rainf_(BAFOG_FG)	156	Protium.gallicum	154.1
Lowland_trop_rainf_(Paracaou_FG)	150	Pogonophora_schomburgkiana	45.6	116.4		Lowland_trop_rainf_(BAFOG_FG)	156	Protium.gallicum	130.4
Lowland_trop_rainf_(Paracaou_FG)	150	Pogonophora_schomburgkiana	34.2	129.2		Lowland_trop_rainf_(BAFOG_FG)	156	Protium.gallicum	122
Lowland_trop_rainf_(Paracaou_FG)	150	Pogonophora_schomburgkiana	44	134.3		Lowland_trop_rainf_(BAFOG_FG)	156	Protium.gallicum	143.8
Lowland_trop_rainf_(Paracaou_FG)	150	Pogonophora_schomburgkiana	36	113.9		Lowland_trop_rainf_(BAFOG_FG)	156	Protium.gallicum	138.7
Lowland_trop_rainf_(Paracaou_FG)	150	Pogonophora_schomburgkiana	47.6	138.9		Lowland_trop_rainf_(BAFOG_FG)	156	Protium.gallicum	122.8
Lowland_trop_rainf_(Paracaou_FG)	150	Pogonophora_schomburgkiana	59	148.2		Lowland_trop_rainf_(BAFOG_FG)	156	Protium.gallicum	113
Lowland_trop_rainf_(Paracaou_FG)	150	Pogonophora_schomburgkiana	16.9	126.4		Lowland_trop_rainf_(BAFOG_FG)	156	Protium.gallicum	135.1
Lowland_trop_rainf_(Paracaou_FG)	150	Pogonophora_schomburgkiana	57	141.4		Lowland_trop_rainf_(BAFOG_FG)	156	Protium.gallicum	117.5
Lowland_trop_rainf_(Paracaou_FG)	150	Pogonophora_schomburgkiana	49.7	129.1		Lowland_trop_rainf_(BAFOG_FG)	156	Iryanthera.sagotiana	104.1
Lowland_trop_rainf_(Paracaou_FG)	150	Pogonophora_schomburgkiana	34.7	151.7		Lowland_trop_rainf_(BAFOG_FG)	156	Iryanthera.sagotiana	99.6
Lowland_trop_rainf_(Paracaou_FG)	150	Pogonophora_schomburgkiana	51.7	116.3		Lowland_trop_rainf_(BAFOG_FG)	156	Iryanthera.sagotiana	114.6
Lowland_trop_rainf_(Paracaou_FG)	150	Pogonophora_schomburgkiana	31.7	120.4		Lowland_trop_rainf_(BAFOG_FG)	156	Iryanthera.sagotiana	143.9
Lowland_trop_rainf_(Paracaou_FG)	150	Rheedia_madruno	172.6	72.9		Lowland_trop_rainf_(BAFOG_FG)	156	Iryanthera.sagotiana	113.2
Lowland_trop_rainf_(Paracaou_FG)	150	Rheedia_madruno	189.3	57.4		Lowland_trop_rainf_(BAFOG_FG)	156	Iryanthera.sagotiana	140.4
Lowland_trop_rainf_(Paracaou_FG)	150	Rheedia_madruno	146.7	87.8		Lowland_trop_rainf_(BAFOG_FG)	156	Iryanthera.sagotiana	100.2
Lowland_trop_rainf_(Paracaou_FG)	150	Rheedia_madruno	302	71.4		Lowland_trop_rainf_(BAFOG_FG)	156	Iryanthera.sagotiana	159.9
Lowland_trop_rainf_(Paracaou_FG)	150	Rheedia_madruno	95.8	94		Lowland_trop_rainf_(BAFOG_FG)	156	Iryanthera.sagotiana	107.4
Lowland_trop_rainf_(Paracaou_FG)	150	Rheedia_madruno	119.9	81.1		Lowland_trop_rainf_(BAFOG_FG)	156	Iryanthera.sagotiana	101.7
Lowland_trop_rainf_(Paracaou_FG)	150	Rheedia_madruno	103.2	72		Lowland_trop_rainf_(BAFOG_FG)	156	Iryanthera.sagotiana	163.4
Lowland_trop_rainf_(Paracaou_FG)	150	Rheedia_madruno	236.1	82.2		Lowland_trop_rainf_(BAFOG_FG)	156	Iryanthera.sagotiana	117.9
Lowland_trop_rainf_(Paracaou_FG)	150	Rheedia_madruno	134.6	65.5		Lowland_trop_rainf_(BAFOG_FG)	156	Iryanthera.sagotiana	134
Lowland_trop_rainf_(Paracaou_FG)	150	Rheedia_madruno	131	78.6		Lowland_trop_rainf_(BAFOG_FG)	156	Iryanthera.sagotiana	152.6
Lowland_trop_rainf_(Paracaou_FG)	150	Sandwithia_guianensis	138.5	163.8		Lowland_trop_rainf_(BAFOG_FG)	156	Iryanthera.sagotiana	133.8
Lowland_trop_rainf_(Paracaou_FG)	150	Sandwithia_guianensis	45.7	163.5		Lowland_trop_rainf_(BAFOG_FG)	156	Iryanthera.sagotiana	164
Lowland_trop_rainf_(Paracaou_FG)	150	Sandwithia_guianensis	60	178.4		Lowland_trop_rainf_(BAFOG_FG)	156	Iryanthera.sagotiana	132
Lowland_trop_rainf_(Paracaou_FG)	150	Sandwithia_guianensis	94.7	158.9		Lowland_trop_rainf_(BAFOG_FG)	156	Iryanthera.sagotiana	124.5
Lowland_trop_rainf_(Paracaou_FG)	150	Sandwithia_guianensis	57.3	132.9		Lowland_trop_rainf_(BAFOG_FG)	156	Iryanthera.sagotiana	159.5
Lowland_trop_rainf_(Paracaou_FG)	150	Sandwithia_guianensis	55.6	143.4		Lowland_trop_rainf_(BAFOG_FG)	156	Iryanthera.sagotiana	108
Lowland_trop_rainf_(Paracaou_FG)	150	Sandwithia_guianensis	74.5	176.8		Lowland_trop_rainf_(Nouragues_FG)	197	Astrocaryum.sciophilum	51.1
Lowland_trop_rainf_(Paracaou_FG)	150	Sandwithia_guianensis	30.6	162.5		Lowland_trop_rainf_(Nouragues_FG)	197	Astrocaryum.sciophilum	58
Lowland_trop_rainf_(Paracaou_FG)	150	Sandwithia_guianensis	51	176.6		Lowland_trop_rainf_(Nouragues_FG)	197	Astrocaryum.sciophilum	47.1
Lowland_trop_rainf_(Paracaou_FG)	150	Sandwithia_guianensis	39.7	109.5		Lowland_trop_rainf_(Nouragues_FG)	197	Astrocaryum.sciophilum	57.8
Lowland_trop_rainf_(Paracaou_FG)	150	Sandwithia_guianensis	38.1	160.9		Lowland_trop_rainf_(Nouragues_FG)	197	Astrocaryum.sciophilum	70
Lowland_trop_rainf_(Paracaou_FG)	150	Sandwithia_guianensis	46.8	162.2		Lowland_trop_rainf_(Nouragues_FG)	197	Astrocaryum.sciophilum	63.7
Lowland_trop_rainf_(Paracaou_FG)	150	Sandwithia_guianensis	27.7	144.3		Lowland_trop_rainf_(Nouragues_FG)	197	Astrocaryum.sciophilum	41.6
Lowland_trop_rainf_(Paracaou_FG)	150	Sandwithia_guianensis	43	118.3		Lowland_trop_rainf_(Nouragues_FG)	197	Astrocaryum.sciophilum	43.4
Lowland_trop_rainf_(Paracaou_FG)	150	Sandwithia_guianensis	55.8	126		Lowland_trop_rainf_(Nouragues_FG)	197	Astrocaryum.sciophilum	55.4
Lowland_trop_rainf_(Paracaou_FG)	150	Sandwithia_guianensis	70.3	166.5		Lowland_trop_rainf_(Nouragues_FG)	197	Astrocaryum.sciophilum	69.7
Lowland_trop_rainf_(Paracaou_FG)	150	Sandwithia_guianensis	48.1	158.8		Lowland_trop_rainf_(Nouragues_FG)	197	Astrocaryum.sciophilum	182.8
Lowland_trop_rainf_(Paracaou_FG)	150	Sandwithia_guianensis	105.7	146.7		Lowland_trop_rainf_(Nouragues_FG)	197	Astrocaryum.sciophilum	65.3
Lowland_trop_rainf_(Paracaou_FG)	150	Sandwithia_guianensis	28.1	143.2		Lowland_trop_rainf_(Nouragues_FG)	197	Astrocaryum.sciophilum	49.9
Lowland_trop_rainf_(Paracaou_FG)	150	Sandwithia_guianensis	84.2	186.8		Lowland_trop_rainf_(Nouragues_FG)	197	Astrocaryum.sciophilum	53.3
Lowland_trop_rainf_(Paracaou_FG)	150	Sandwithia_guianensis	31.5	168.9		Lowland_trop_rainf_(Nouragues_FG)	197	Astrocaryum.sciophilum	48.1
Lowland_trop_rainf_(Paracaou_FG)	150	Sandwithia_guianensis	33.6	163.1		Lowland_trop_rainf_(Nouragues_FG)	197	Astrocaryum.sciophilum	80.6
Lowland_trop_rainf_(Paracaou_FG)	150	Sandwithia_guianensis	85.3	144.4		Lowland_trop_rainf_(Nouragues_FG)	197	Astrocaryum.sciophilum	49.2
Lowland_trop_rainf_(Paracaou_FG)	150	Sandwithia_guianensis	47.4	193.9		Lowland_trop_rainf_(Nouragues_FG)	197	Astrocaryum.sciophilum	58.8
Lowland_trop_rainf_(Paracaou_FG)	150	Sandwithia_guianensis	37.7	122.4		Lowland_trop_rainf_(Nouragues_FG)	197	Astrocaryum.sciophilum	45.9
Lowland_trop_rainf_(Paracaou_FG)	150	Sandwithia_guianensis	60.5	153.5		Lowland_trop_rainf_(Nouragues_FG)	197	Astrocaryum.sciophilum	79
Lowland_trop_rainf_(Paracaou_FG)	150	Sandwithia_guianensis	62.7	144.1		Lowland_trop_rainf_(Nouragues_FG)	197	Astrocaryum.sciophilum	64.4
Lowland_trop_rainf_(Paracaou_FG)	150	Sandwithia_guianensis	85.5	154.7		Lowland_trop_rainf_(Nouragues_FG)	197	Bocoa.prouacensis	95.8
Lowland_trop_rainf_(Paracaou_FG)	150	Sandwithia_guianensis	44.3	194.3		Lowland_trop_rainf_(Nouragues_FG)	197	Bocoa.prouacensis	143.7
Lowland_trop_rainf_(Paracaou_FG)	150	Sandwithia_guianensis	14.6	99.1		Lowland_trop_rainf_(Nouragues_FG)	197	Bocoa.prouacensis	94.1
Lowland_trop_rainf_(Paracaou_FG)	150	Sandwithia_guianensis	93.2	154.3		Lowland_trop_rainf_(Nouragues_FG)	197	Bocoa.prouacensis	138.6
Lowland_trop_rainf_(Paracaou_FG)	150	Sandwithia_guianensis	54.9	149.3		Lowland_trop_rainf_(Nouragues_FG)	197	Bocoa.prouacensis	101.6
Lowland_trop_rainf_(Paracaou_FG)	150	Sandwithia_guianensis	20.3	146.2		Lowland_trop_rainf_(Nouragues_FG)	197	Bocoa.prouacensis	94.1
Lowland_trop_rainf_(Paracaou_FG)	150	Sandwithia_guianensis	42.6	144.5		Lowland_trop_rainf_(Nouragues_FG)	197	Bocoa.prouacensis	131.3
Lowland_trop_rainf_(Paracaou_FG)	150	Sandwithia_guianensis	37.7	120.4		Lowland_trop_rainf_(Nouragues_FG)	197	Bocoa.prouacensis	131.3
Lowland_trop_rainf_(Paracaou_FG)	150	Sandwithia_guianensis	67	182.8		Lowland_trop_rainf_(Nouragues_FG)	197	Bocoa.prouacensis	118.1
Lowland_trop_rainf_(Paracaou_FG)	150	Sandwithia_guianensis	46	159.1		Lowland_trop_rainf_(Nouragues_FG)	197	Bocoa.prouacensis	120.7
Lowland_trop_rainf_(Paracaou_FG)	150	Tapura_capitulifera	15	68.5		Lowland_trop_rainf_(Nouragues_FG)	197	Bocoa.prouacensis	125.4
Lowland_trop_rainf_(Paracaou_FG)	150	Tapura_capitulifera	32.1	51.8		Lowland_trop_rainf_(Nouragues_FG)	197	Bocoa.prouacensis	133
Lowland_trop_rainf_(Paracaou_FG)	150	Tapura_capitulifera	20.7	63.3		Lowland_trop_rainf_(Nouragues_FG)	197	Bocoa.prouacensis	127.4
Lowland_trop_rainf_(Paracaou_FG)	150	Tapura_capitulifera	29	75.3		Lowland_trop_rainf_(Nouragues_FG)	197	Eschweilera.coriacea	127.9
Lowland_trop_rainf_(Paracaou_FG)	150	Tapura_capitulifera	31.2	67.2		Lowland_trop_rainf_(Nouragues_FG)	197	Eschweilera.coriacea	109.4
Lowland_trop_rainf_(Paracaou_FG)	150	Tapura_capitulifera	35.3	69.9		Lowland_trop_rainf_(Nouragues_FG)	197	Eschweilera.coriacea	91
Lowland_trop_rainf_(Paracaou_FG)	150	Tapura_capitulifera	16.6	67.2		Lowland_trop_rainf_(Nouragues_FG)	197	Eschweilera.coriacea	130.4
Lowland_trop_rainf_(Paracaou_FG)	150	Tapura_capitulifera	21.8	55.7		Lowland_trop_rainf_(Nouragues_FG)	197	Eschweilera.coriacea	93.8
Lowland_trop_rainf_(Paracaou_FG)	150	Tapura_capitulifera	36.7	75.9		Lowland_trop_rainf_(Nouragues_FG)	197	Eschweilera.coriacea	123.4
Lowland_trop_rainf_(Paracaou_FG)	150	Tapura_capitulifera	15.2	47		Lowland_trop_rainf_(Nouragues_FG)	197	Eschweilera.coriacea	101.1
Lowland_trop_rainf_(Paracaou_FG)	150	Tapura_capitulifera	24.9	82.4		Lowland_trop_rainf_(Nouragues_FG)	197	Eschweilera.coriacea	101.9
Lowland_trop_rainf_(Paracaou_FG)	150	Tapura_capitulifera	25.4	47.4		Lowland_trop_rainf_(Nouragues_FG)	197	Eschweilera.coriacea	89.9
Lowland_trop_rainf_(Paracaou_FG)	150	Tapura_capitulifera	36.7	72.5		Lowland_trop_rainf_(Nouragues_FG)	197	Eschweilera.coriacea	96.4
Lowland_trop_rainf_(Paracaou_FG)	150	Tapura_capitulifera	17.5	53.5		Lowland_trop_rainf_(Nouragues_FG)	197	Eschweilera.coriacea	94.9
Lowland_trop_rainf_(Paracaou_FG)	150	Tovomita_sp._B1	27.9	102.7		Lowland_trop_rainf_(Nouragues_FG)	197	Eschweilera.coriacea	103.9
Lowland_trop_rainf_(Paracaou_FG)	150	Tovomita_sp._B1	44.6	93.6		Lowland_trop_rainf_(Nouragues_FG)	197	Eschweilera.coriacea	128.3
Lowland_trop_rainf_(Paracaou_FG)	150	Tovomita_sp._B1	41.6	131.3		Lowland_trop_rainf_(Nouragues_FG)	197	Eschweilera.coriacea	130.1
Lowland_trop_rainf_(Paracaou_FG)	150	Tovomita_sp._B1	39.2	126.6		Lowland_trop_rainf_(Nouragues_FG)	197	Eschweilera.coriacea	113.8
Lowland_trop_rainf_(Paracaou_FG)	150	Tovomita_sp._B1	45.8	120.9		Lowland_trop_rainf_(Nouragues_FG)	197	Eschweilera.coriacea	112.6
Lowland_trop_rainf_(Paracaou_FG)	150	Tovomita_sp._B1	63.7	101.8		Lowland_trop_rainf_(Nouragues_FG)	197	Eschweilera.coriacea	128.3
Lowland_trop_rainf_(Paracaou_FG)	150	Tovomita_sp._B1	64.4	133.6		Lowland_trop_rainf_(Nouragues_FG)	197	Eschweilera.coriacea	134.4
Lowland_trop_rainf_(Paracaou_FG)	150	Tovomita_sp._B1	32.4	118		Lowland_trop_rainf_(Nouragues_FG)	197	Gustavia.hexapetala	201.8
Lowland_trop_rainf_(Paracaou_FG)	150	Tovomita_sp._B1	52.8	135.5		Lowland_trop_rainf_(Nouragues_FG)	197	Gustavia.hexapetala	131.1
Lowland_trop_rainf_(Paracaou_FG)	150	Tovomita_sp._B1	46.4	109.4		Lowland_trop_rainf_(Nouragues_FG)	197	Gustavia.hexapetala	142
Lowland_trop_rainf_(Paracaou_FG)	150	Tovomita_sp._B1	42.7	83.9		Lowland_trop_rainf_(Nouragues_FG)	197	Gustavia.hexapetala	107.8
Lowland_trop_rainf_(Paracaou_FG)	150	Tovomita_sp._B1	42	131.8		Lowland_trop_rainf_(Nouragues_FG)	197	Gustavia.hexapetala	128
Lowland_trop_rainf_(Paracaou_FG)	150	Tovomita_sp._B1	49.5	112.8		Lowland_trop_rainf_(Nouragues_FG)	197	Gustavia.hexapetala	151.9
Lowland_trop_rainf_(Paracaou_FG)	150	Tovomita_sp._B1	51.2	126		Lowland_trop_rainf_(Nouragues_FG)	197	Gustavia.hexapetala	110.9
Lowland_trop_rainf_(Paracaou_FG)	150	Tovomita_sp._B1	54.3	143.2		Lowland_trop_rainf_(Nouragues_FG)	197	Gustavia.hexapetala	142.7
Lowland_trop_rainf_(Paracaou_FG)	150	Tovomita_sp._B1	29.6	184.4		Lowland_trop_rainf_(Nouragues_FG)	197	Gustavia.hexapetala	129.8
Lowland_trop_rainf_(Paracaou_FG)	150	Tovomita_sp._B1	88.4	137.9		Lowland_trop_rainf_(Nouragues_FG)	197	Gustavia.hexapetala	116.1
Lowland_trop_rainf_(Paracaou_FG)	150	Tovomita_sp._B1	60.2	155.8		Lowland_trop_rainf_(Nouragues_FG)	197	Jessenia.bataua	127.7
Lowland_trop_rainf_(Paracaou_FG)	150	Tovomita_sp._B1	43.9	182.3		Lowland_trop_rainf_(Nouragues_FG)	197	Jessenia.bataua	87.7
Lowland_trop_rainf_(Paracaou_FG)	150	Tovomita_sp._B1	30.8	123.7		Lowland_trop_rainf_(Nouragues_FG)	197	Jessenia.bataua	64.8
Lowland_trop_rainf_(Paracaou_FG)	150	Tovomita_sp._B1	23.6	108.6		Lowland_trop_rainf_(Nouragues_FG)	197	Jessenia.bataua	72.8
Lowland_trop_rainf_(Paracaou_FG)	150	Tovomita_sp._B1	54.6	149.4		Lowland_trop_rainf_(Nouragues_FG)	197	Jessenia.bataua	49
Lowland_trop_rainf_(Paracaou_FG)	150	Tovomita_sp._B1	38.9	130.4		Lowland_trop_rainf_(Nouragues_FG)	197	Jessenia.bataua	71
Lowland_trop_rainf_(Paracaou_FG)	150	Tovomita_sp._B1	61.9	152.3		Lowland_trop_rainf_(Nouragues_FG)	197	Jessenia.bataua	55.5
Lowland_trop_rainf_(Paracaou_FG)	150	Tovomita_sp._B1	34.2	132.9		Lowland_trop_rainf_(Nouragues_FG)	197	Jessenia.bataua	186.7
Lowland_trop_rainf_(Paracaou_FG)	150	Tovomita_sp._B1	53.6	114.2		Lowland_trop_rainf_(Nouragues_FG)	197	Jessenia.bataua	67.5
Lowland_trop_rainf_(BAFOG_FG)	156	Protium.gallicum	14.2	136.1		Lowland_trop_rainf_(Nouragues_FG)	197	Jessenia.bataua	47.5
Lowland_trop_rainf_(BAFOG_FG)	156	Protium.gallicum	13.8	138.3		Lowland_trop_rainf_(Nouragues_FG)	197	Lecythis.persistens	98.7
Lowland_trop_rainf_(BAFOG_FG)	156	Protium.gallicum	12.4	130.6		Lowland_trop_rainf_(Nouragues_FG)	197	Lecythis.persistens	84.7
Lowland_trop_rainf_(BAFOG_FG)	156	Protium.gallicum	20.3	148.5		Lowland_trop_rainf_(Nouragues_FG)	197	Lecythis.persistens	72.1
Lowland_trop_rainf_(BAFOG_FG)	156	Protium.gallicum	6.9	137.1		Lowland_trop_rainf_(Nouragues_FG)	197	Lecythis.persistens	108.9
Lowland_trop_rainf_(BAFOG_FG)	156	Protium.gallicum	16	124.9		Lowland_trop_rainf_(Nouragues_FG)	197	Lecythis.persistens	87.2
Lowland_trop_rainf_(BAFOG_FG)	156	Protium.gallicum	15	120.3		Lowland_trop_rainf_(Nouragues_FG)	197	Lecythis.persistens	82.5
Lowland_trop_rainf_(BAFOG_FG)	156	Protium.gallicum	13.1	117.3		Lowland_trop_rainf_(Nouragues_FG)	197	Lecythis.persistens	68.1
Lowland_trop_rainf_(BAFOG_FG)	156	Protium.gallicum	11.9	171.2		Lowland_trop_rainf_(Nouragues_FG)	197	Lecythis.persistens	95.6
Lowland_trop_rainf_(BAFOG_FG)	156	Protium.gallicum	14.1	118.2		Lowland_trop_rainf_(Nouragues_FG)	197	Lecythis.persistens	78.5
Lowland_trop_rainf_(BAFOG_FG)	156	Protium.gallicum	11.1	122.1		Lowland_trop_rainf_(Nouragues_FG)	197	Lecythis.persistens	77.2
Lowland_trop_rainf_(BAFOG_FG)	156	Protium.gallicum	17.8	155.1		Lowland_trop_rainf_(Nouragues_FG)	197	Lecythis.persistens	110.6
Lowland_trop_rainf_(BAFOG_FG)	156	Protium.gallicum	14.1	148.4		Lowland_trop_rainf_(Nouragues_FG)	197	Lecythis.persistens	89
Lowland_trop_rainf_(BAFOG_FG)	156	Protium.gallicum	14.7	169		Lowland_trop_rainf_(Nouragues_FG)	197	Lecythis.persistens	68.1
Lowland_trop_rainf_(BAFOG_FG)	156	Protium.gallicum	19.7	172.1		Lowland_trop_rainf_(Nouragues_FG)	197	Lecythis.persistens	81.1
Lowland_trop_rainf_(BAFOG_FG)	156	Protium.gallicum	19.9	136.4		Lowland_trop_rainf_(Nouragues_FG)	197	Lecythis.persistens	70.5
Lowland_trop_rainf_(BAFOG_FG)	156	Protium.gallicum	14.9	154.1		Lowland_trop_rainf_(Nouragues_FG)	197	Lecythis.persistens	84.5
Lowland_trop_rainf_(BAFOG_FG)	156	Protium.gallicum	12.6	130.4		Lowland_trop_rainf_(Nouragues_FG)	197	Lecythis.persistens	54.1
Lowland_trop_rainf_(BAFOG_FG)	156	Protium.gallicum	7.4	122		Lowland_trop_rainf_(Nouragues_FG)	197	Lecythis.persistens	70.1
Lowland_trop_rainf_(BAFOG_FG)	156	Protium.gallicum	14	143.8		Lowland_trop_rainf_(Nouragues_FG)	197	Lecythis.persistens	103.3
Lowland_trop_rainf_(BAFOG_FG)	156	Protium.gallicum	15.1	138.7		Lowland_trop_rainf_(Nouragues_FG)	197	Lecythis.persistens	107
Lowland_trop_rainf_(BAFOG_FG)	156	Protium.gallicum	12.7	122.8		Lowland_trop_rainf_(Nouragues_FG)	197	Lecythis.persistens	88
Lowland_trop_rainf_(BAFOG_FG)	156	Protium.gallicum	9.3	113		Lowland_trop_rainf_(Nouragues_FG)	197	Lecythis.persistens	86.8
Lowland_trop_rainf_(BAFOG_FG)	156	Protium.gallicum	13.3	135.1		Lowland_trop_rainf_(Nouragues_FG)	197	Licania.canescens	95.6
Lowland_trop_rainf_(BAFOG_FG)	156	Protium.gallicum	10.1	117.5		Lowland_trop_rainf_(Nouragues_FG)	197	Licania.canescens	109.6
Lowland_trop_rainf_(BAFOG_FG)	156	Iryanthera.sagotiana	34.2	104.1		Lowland_trop_rainf_(Nouragues_FG)	197	Licania.canescens	109.5
Lowland_trop_rainf_(BAFOG_FG)	156	Iryanthera.sagotiana	27.8	99.6		Lowland_trop_rainf_(Nouragues_FG)	197	Licania.canescens	135
Lowland_trop_rainf_(BAFOG_FG)	156	Iryanthera.sagotiana	29.3	114.6		Lowland_trop_rainf_(Nouragues_FG)	197	Licania.canescens	107.2
Lowland_trop_rainf_(BAFOG_FG)	156	Iryanthera.sagotiana	44.5	143.9		Lowland_trop_rainf_(Nouragues_FG)	197	Licania.canescens	103.2
Lowland_trop_rainf_(BAFOG_FG)	156	Iryanthera.sagotiana	43.8	113.2		Lowland_trop_rainf_(Nouragues_FG)	197	Licania.canescens	99.1
Lowland_trop_rainf_(BAFOG_FG)	156	Iryanthera.sagotiana	76.6	140.4		Lowland_trop_rainf_(Nouragues_FG)	197	Licania.canescens	82.7
Lowland_trop_rainf_(BAFOG_FG)	156	Iryanthera.sagotiana	40.5	100.2		Lowland_trop_rainf_(Nouragues_FG)	197	Licania.canescens	86
Lowland_trop_rainf_(BAFOG_FG)	156	Iryanthera.sagotiana	44.3	159.9		Lowland_trop_rainf_(Nouragues_FG)	197	Licania.canescens	97.4
Lowland_trop_rainf_(BAFOG_FG)	156	Iryanthera.sagotiana	46.7	107.4		Lowland_trop_rainf_(Nouragues_FG)	197	Licania.canescens	133.9
Lowland_trop_rainf_(BAFOG_FG)	156	Iryanthera.sagotiana	31.1	101.7		Lowland_trop_rainf_(Nouragues_FG)	197	Licania.canescens	121.7
Lowland_trop_rainf_(BAFOG_FG)	156	Iryanthera.sagotiana	35.1	163.4		Lowland_trop_rainf_(Nouragues_FG)	197	Licania.canescens	117.6
Lowland_trop_rainf_(BAFOG_FG)	156	Iryanthera.sagotiana	36.8	117.9		Lowland_trop_rainf_(Nouragues_FG)	197	Licania.canescens	100.8
Lowland_trop_rainf_(BAFOG_FG)	156	Iryanthera.sagotiana	40.2	134		Lowland_trop_rainf_(Nouragues_FG)	197	Licania.canescens	148.4
Lowland_trop_rainf_(BAFOG_FG)	156	Iryanthera.sagotiana	29.2	152.6		Lowland_trop_rainf_(Nouragues_FG)	197	Licania.canescens	124
Lowland_trop_rainf_(BAFOG_FG)	156	Iryanthera.sagotiana	22.2	133.8		Lowland_trop_rainf_(Nouragues_FG)	197	Licania.canescens	109.4
Lowland_trop_rainf_(BAFOG_FG)	156	Iryanthera.sagotiana	30.6	164		Lowland_trop_rainf_(Nouragues_FG)	197	Licania.canescens	101.7
Lowland_trop_rainf_(BAFOG_FG)	156	Iryanthera.sagotiana	43.4	132		Lowland_trop_rainf_(Nouragues_FG)	197	Licania.canescens	94.9
Lowland_trop_rainf_(BAFOG_FG)	156	Iryanthera.sagotiana	39.1	124.5		Lowland_trop_rainf_(Nouragues_FG)	197	Licania.canescens	106.9
Lowland_trop_rainf_(BAFOG_FG)	156	Iryanthera.sagotiana	30.7	159.5		Lowland_trop_rainf_(Nouragues_FG)	197	Licania.canescens	147.8
Lowland_trop_rainf_(BAFOG_FG)	156	Iryanthera.sagotiana	52.6	108		Lowland_trop_rainf_(Nouragues_FG)	197	Licania.canescens	133.5
Lowland_trop_rainf_(Nouragues_FG)	197	Astrocaryum.sciophilum	758.4	51.1		Lowland_trop_rainf_(Nouragues_FG)	197	Licania.canescens	108.3
Lowland_trop_rainf_(Nouragues_FG)	197	Astrocaryum.sciophilum	598.8	58		Lowland_trop_rainf_(Nouragues_FG)	197	Licania.canescens	152
Lowland_trop_rainf_(Nouragues_FG)	197	Astrocaryum.sciophilum	336	47.1		Lowland_trop_rainf_(Nouragues_FG)	197	Licania.canescens	111.6
Lowland_trop_rainf_(Nouragues_FG)	197	Astrocaryum.sciophilum	444	57.8		Lowland_trop_rainf_(Nouragues_FG)	197	Pouteria.gonggrijpii	121.3
Lowland_trop_rainf_(Nouragues_FG)	197	Astrocaryum.sciophilum	528	70		Lowland_trop_rainf_(Nouragues_FG)	197	Pouteria.gonggrijpii	97.4
Lowland_trop_rainf_(Nouragues_FG)	197	Astrocaryum.sciophilum	313.2	63.7		Lowland_trop_rainf_(Nouragues_FG)	197	Pouteria.gonggrijpii	77
Lowland_trop_rainf_(Nouragues_FG)	197	Astrocaryum.sciophilum	836.4	41.6		Lowland_trop_rainf_(Nouragues_FG)	197	Pouteria.gonggrijpii	61.6
Lowland_trop_rainf_(Nouragues_FG)	197	Astrocaryum.sciophilum	344.4	43.4		Lowland_trop_rainf_(Nouragues_FG)	197	Pouteria.gonggrijpii	82.8
Lowland_trop_rainf_(Nouragues_FG)	197	Astrocaryum.sciophilum	504	55.4		Lowland_trop_rainf_(Nouragues_FG)	197	Pouteria.gonggrijpii	96.4
Lowland_trop_rainf_(Nouragues_FG)	197	Astrocaryum.sciophilum	408	69.7		Lowland_trop_rainf_(Nouragues_FG)	197	Pouteria.gonggrijpii	71
Lowland_trop_rainf_(Nouragues_FG)	197	Astrocaryum.sciophilum	2095.2	182.8		Lowland_trop_rainf_(Nouragues_FG)	197	Pouteria.gonggrijpii	90.3
Lowland_trop_rainf_(Nouragues_FG)	197	Astrocaryum.sciophilum	516	65.3		Lowland_trop_rainf_(Nouragues_FG)	197	Pouteria.gonggrijpii	104.5
Lowland_trop_rainf_(Nouragues_FG)	197	Astrocaryum.sciophilum	522	49.9		Lowland_trop_rainf_(Nouragues_FG)	197	Pouteria.gonggrijpii	89.2
Lowland_trop_rainf_(Nouragues_FG)	197	Astrocaryum.sciophilum	670.8	53.3		Lowland_trop_rainf_(Nouragues_FG)	197	Pouteria.gonggrijpii	115.8
Lowland_trop_rainf_(Nouragues_FG)	197	Astrocaryum.sciophilum	577.2	48.1		Lowland_trop_rainf_(Nouragues_FG)	197	Quararibea.duckei	220
Lowland_trop_rainf_(Nouragues_FG)	197	Astrocaryum.sciophilum	800.4	80.6		Lowland_trop_rainf_(Nouragues_FG)	197	Quararibea.duckei	164.3
Lowland_trop_rainf_(Nouragues_FG)	197	Astrocaryum.sciophilum	600	49.2		Lowland_trop_rainf_(Nouragues_FG)	197	Quararibea.duckei	264.8
Lowland_trop_rainf_(Nouragues_FG)	197	Astrocaryum.sciophilum	561.6	58.8		Lowland_trop_rainf_(Nouragues_FG)	197	Quararibea.duckei	208.1
Lowland_trop_rainf_(Nouragues_FG)	197	Astrocaryum.sciophilum	558	45.9		Lowland_trop_rainf_(Nouragues_FG)	197	Quararibea.duckei	214.8
Lowland_trop_rainf_(Nouragues_FG)	197	Astrocaryum.sciophilum	565.2	79		Lowland_trop_rainf_(Nouragues_FG)	197	Quararibea.duckei	191.3
Lowland_trop_rainf_(Nouragues_FG)	197	Astrocaryum.sciophilum	399.6	64.4		Lowland_trop_rainf_(Nouragues_FG)	197	Quararibea.duckei	202.2
Lowland_trop_rainf_(Nouragues_FG)	197	Bocoa.prouacensis	56.8	95.8		Lowland_trop_rainf_(Nouragues_FG)	197	Quararibea.duckei	184.4
Lowland_trop_rainf_(Nouragues_FG)	197	Bocoa.prouacensis	55.6	143.7		Lowland_trop_rainf_(Nouragues_FG)	197	Quararibea.duckei	217
Lowland_trop_rainf_(Nouragues_FG)	197	Bocoa.prouacensis	50.9	94.1		Lowland_trop_rainf_(Nouragues_FG)	197	Quararibea.duckei	403.5
Lowland_trop_rainf_(Nouragues_FG)	197	Bocoa.prouacensis	29.6	138.6		Lowland_trop_rainf_(Nouragues_FG)	197	Quararibea.duckei	158.6
Lowland_trop_rainf_(Nouragues_FG)	197	Bocoa.prouacensis	56.7	101.6		Lowland_trop_rainf_(Nouragues_FG)	197	Quararibea.duckei	195.1
Lowland_trop_rainf_(Nouragues_FG)	197	Bocoa.prouacensis	104.2	94.1		Lowland_trop_rainf_(Nouragues_FG)	197	Quararibea.duckei	256.2
Lowland_trop_rainf_(Nouragues_FG)	197	Bocoa.prouacensis	46.1	131.3		Lowland_trop_rainf_(Nouragues_FG)	197	Quararibea.duckei	132.8
Lowland_trop_rainf_(Nouragues_FG)	197	Bocoa.prouacensis	80.9	131.3		Lowland_trop_rainf_(Nouragues_FG)	197	Quararibea.duckei	170
Lowland_trop_rainf_(Nouragues_FG)	197	Bocoa.prouacensis	38.8	118.1		Lowland_trop_rainf_(Nouragues_FG)	197	Quararibea.duckei	170.6
Lowland_trop_rainf_(Nouragues_FG)	197	Bocoa.prouacensis	56	120.7		Lowland_trop_rainf_(Nouragues_FG)	197	Quararibea.duckei	198.3
Lowland_trop_rainf_(Nouragues_FG)	197	Bocoa.prouacensis	50.1	125.4		Lowland_trop_rainf_(Nouragues_FG)	197	Quararibea.duckei	233.7
Lowland_trop_rainf_(Nouragues_FG)	197	Bocoa.prouacensis	49.3	133		Lowland_trop_rainf_(Nouragues_FG)	197	Quararibea.duckei	178.2
Lowland_trop_rainf_(Nouragues_FG)	197	Bocoa.prouacensis	47.4	127.4		Lowland_trop_rainf_(Nouragues_FG)	197	Quararibea.duckei	201.3
Lowland_trop_rainf_(Nouragues_FG)	197	Eschweilera.coriacea	108.1	127.9		Lowland_trop_rainf_(Nouragues_FG)	197	Quararibea.duckei	169.9
Lowland_trop_rainf_(Nouragues_FG)	197	Eschweilera.coriacea	108.6	109.4		Lowland_trop_rainf_(Montagne_Tortue_FG)	213	Astrocaryum.sciophilum	50.2
Lowland_trop_rainf_(Nouragues_FG)	197	Eschweilera.coriacea	49.7	91		Lowland_trop_rainf_(Montagne_Tortue_FG)	213	Astrocaryum.sciophilum	66.5
Lowland_trop_rainf_(Nouragues_FG)	197	Eschweilera.coriacea	52.6	130.4		Lowland_trop_rainf_(Montagne_Tortue_FG)	213	Astrocaryum.sciophilum	63.9
Lowland_trop_rainf_(Nouragues_FG)	197	Eschweilera.coriacea	132.1	93.8		Lowland_trop_rainf_(Montagne_Tortue_FG)	213	Astrocaryum.sciophilum	50
Lowland_trop_rainf_(Nouragues_FG)	197	Eschweilera.coriacea	78.2	123.4		Lowland_trop_rainf_(Montagne_Tortue_FG)	213	Astrocaryum.sciophilum	69
Lowland_trop_rainf_(Nouragues_FG)	197	Eschweilera.coriacea	62.4	101.1		Lowland_trop_rainf_(Montagne_Tortue_FG)	213	Astrocaryum.sciophilum	64.5
Lowland_trop_rainf_(Nouragues_FG)	197	Eschweilera.coriacea	88	101.9		Lowland_trop_rainf_(Montagne_Tortue_FG)	213	Astrocaryum.sciophilum	60.7
Lowland_trop_rainf_(Nouragues_FG)	197	Eschweilera.coriacea	124.3	89.9		Lowland_trop_rainf_(Montagne_Tortue_FG)	213	Astrocaryum.sciophilum	54.2
Lowland_trop_rainf_(Nouragues_FG)	197	Eschweilera.coriacea	86.5	96.4		Lowland_trop_rainf_(Montagne_Tortue_FG)	213	Astrocaryum.sciophilum	42
Lowland_trop_rainf_(Nouragues_FG)	197	Eschweilera.coriacea	84.7	94.9		Lowland_trop_rainf_(Montagne_Tortue_FG)	213	Astrocaryum.sciophilum	47.5
Lowland_trop_rainf_(Nouragues_FG)	197	Eschweilera.coriacea	78.9	103.9		Lowland_trop_rainf_(Montagne_Tortue_FG)	213	Protium.opacum	94.8
Lowland_trop_rainf_(Nouragues_FG)	197	Eschweilera.coriacea	100.3	128.3		Lowland_trop_rainf_(Montagne_Tortue_FG)	213	Protium.opacum	117.6
Lowland_trop_rainf_(Nouragues_FG)	197	Eschweilera.coriacea	48.1	130.1		Lowland_trop_rainf_(Montagne_Tortue_FG)	213	Protium.opacum	118.6
Lowland_trop_rainf_(Nouragues_FG)	197	Eschweilera.coriacea	86.3	113.8		Lowland_trop_rainf_(Montagne_Tortue_FG)	213	Protium.opacum	115.6
Lowland_trop_rainf_(Nouragues_FG)	197	Eschweilera.coriacea	145.6	112.6		Lowland_trop_rainf_(Montagne_Tortue_FG)	213	Protium.opacum	106.6
Lowland_trop_rainf_(Nouragues_FG)	197	Eschweilera.coriacea	87.8	128.3		Lowland_trop_rainf_(Montagne_Tortue_FG)	213	Protium.opacum	144.3
Lowland_trop_rainf_(Nouragues_FG)	197	Eschweilera.coriacea	133.7	134.4		Lowland_trop_rainf_(Montagne_Tortue_FG)	213	Protium.opacum	87.6
Lowland_trop_rainf_(Nouragues_FG)	197	Gustavia.hexapetala	73.9	201.8		Lowland_trop_rainf_(Montagne_Tortue_FG)	213	Protium.opacum	142.1
Lowland_trop_rainf_(Nouragues_FG)	197	Gustavia.hexapetala	58	131.1		Lowland_trop_rainf_(Montagne_Tortue_FG)	213	Protium.opacum	131.7
Lowland_trop_rainf_(Nouragues_FG)	197	Gustavia.hexapetala	71.4	142		Lowland_trop_rainf_(Montagne_Tortue_FG)	213	Protium.opacum	76.3
Lowland_trop_rainf_(Nouragues_FG)	197	Gustavia.hexapetala	55.4	107.8		Lowland_trop_rainf_(Montagne_Tortue_FG)	213	Protium.opacum	135.8
Lowland_trop_rainf_(Nouragues_FG)	197	Gustavia.hexapetala	140.2	128		Lowland_trop_rainf_(Montagne_Tortue_FG)	213	Eschweilera.coriacea	113.8
Lowland_trop_rainf_(Nouragues_FG)	197	Gustavia.hexapetala	88.2	151.9		Lowland_trop_rainf_(Montagne_Tortue_FG)	213	Eschweilera.coriacea	125
Lowland_trop_rainf_(Nouragues_FG)	197	Gustavia.hexapetala	75	110.9		Lowland_trop_rainf_(Montagne_Tortue_FG)	213	Eschweilera.coriacea	103.3
Lowland_trop_rainf_(Nouragues_FG)	197	Gustavia.hexapetala	69	142.7		Lowland_trop_rainf_(Montagne_Tortue_FG)	213	Eschweilera.coriacea	173.2
Lowland_trop_rainf_(Nouragues_FG)	197	Gustavia.hexapetala	59.9	129.8		Lowland_trop_rainf_(Montagne_Tortue_FG)	213	Eschweilera.coriacea	122.1
Lowland_trop_rainf_(Nouragues_FG)	197	Gustavia.hexapetala	96.5	116.1		Lowland_trop_rainf_(Montagne_Tortue_FG)	213	Eschweilera.coriacea	104
Lowland_trop_rainf_(Nouragues_FG)	197	Jessenia.bataua	442.8	127.7		Lowland_trop_rainf_(Montagne_Tortue_FG)	213	Eschweilera.coriacea	116.3
Lowland_trop_rainf_(Nouragues_FG)	197	Jessenia.bataua	402	87.7		Lowland_trop_rainf_(Montagne_Tortue_FG)	213	Eschweilera.coriacea	98.2
Lowland_trop_rainf_(Nouragues_FG)	197	Jessenia.bataua	462	64.8		Lowland_trop_rainf_(Montagne_Tortue_FG)	213	Eschweilera.coriacea	107.6
Lowland_trop_rainf_(Nouragues_FG)	197	Jessenia.bataua	656.4	72.8		Lowland_trop_rainf_(Montagne_Tortue_FG)	213	Eschweilera.coriacea	123.7
Lowland_trop_rainf_(Nouragues_FG)	197	Jessenia.bataua	566.4	49		Lowland_trop_rainf_(Saut_Lavilette_FG)	224	Oxandra.asbeckii	113.5
Lowland_trop_rainf_(Nouragues_FG)	197	Jessenia.bataua	276	71		Lowland_trop_rainf_(Saut_Lavilette_FG)	224	Oxandra.asbeckii	89.4
Lowland_trop_rainf_(Nouragues_FG)	197	Jessenia.bataua	1207.2	55.5		Lowland_trop_rainf_(Saut_Lavilette_FG)	224	Oxandra.asbeckii	123.8
Lowland_trop_rainf_(Nouragues_FG)	197	Jessenia.bataua	658.8	186.7		Lowland_trop_rainf_(Saut_Lavilette_FG)	224	Oxandra.asbeckii	89.3
Lowland_trop_rainf_(Nouragues_FG)	197	Jessenia.bataua	651.6	67.5		Lowland_trop_rainf_(Saut_Lavilette_FG)	224	Oxandra.asbeckii	105.8
Lowland_trop_rainf_(Nouragues_FG)	197	Jessenia.bataua	1030.8	47.5		Lowland_trop_rainf_(Saut_Lavilette_FG)	224	Oxandra.asbeckii	113.4
Lowland_trop_rainf_(Nouragues_FG)	197	Lecythis.persistens	91.7	98.7		Lowland_trop_rainf_(Saut_Lavilette_FG)	224	Oxandra.asbeckii	107.7
Lowland_trop_rainf_(Nouragues_FG)	197	Lecythis.persistens	180.2	84.7		Lowland_trop_rainf_(Saut_Lavilette_FG)	224	Oxandra.asbeckii	122.5
Lowland_trop_rainf_(Nouragues_FG)	197	Lecythis.persistens	87.1	72.1		Lowland_trop_rainf_(Saut_Lavilette_FG)	224	Oxandra.asbeckii	134.2
Lowland_trop_rainf_(Nouragues_FG)	197	Lecythis.persistens	67.8	108.9		Lowland_trop_rainf_(Saut_Lavilette_FG)	224	Oxandra.asbeckii	115.8
Lowland_trop_rainf_(Nouragues_FG)	197	Lecythis.persistens	200.9	87.2		Lowland_trop_rainf_(Saut_Lavilette_FG)	224	Oxandra.asbeckii	108.5
Lowland_trop_rainf_(Nouragues_FG)	197	Lecythis.persistens	109.7	82.5		Lowland_trop_rainf_(Saut_Lavilette_FG)	224	Oxandra.asbeckii	131.1
Lowland_trop_rainf_(Nouragues_FG)	197	Lecythis.persistens	130.3	68.1		Lowland_trop_rainf_(Saut_Lavilette_FG)	224	Oxandra.asbeckii	88
Lowland_trop_rainf_(Nouragues_FG)	197	Lecythis.persistens	81.7	95.6		Lowland_trop_rainf_(Saut_Lavilette_FG)	224	Oxandra.asbeckii	111.6
Lowland_trop_rainf_(Nouragues_FG)	197	Lecythis.persistens	75.2	78.5		Lowland_trop_rainf_(Saut_Lavilette_FG)	224	Oxandra.asbeckii	126
Lowland_trop_rainf_(Nouragues_FG)	197	Lecythis.persistens	174.5	77.2		Lowland_trop_rainf_(Saut_Lavilette_FG)	224	Oxandra.asbeckii	105.8
Lowland_trop_rainf_(Nouragues_FG)	197	Lecythis.persistens	76.1	110.6		Lowland_trop_rainf_(Saut_Lavilette_FG)	224	Oxandra.asbeckii	120.7
Lowland_trop_rainf_(Nouragues_FG)	197	Lecythis.persistens	123.3	89		Lowland_trop_rainf_(Saut_Lavilette_FG)	224	Oxandra.asbeckii	116.4
Lowland_trop_rainf_(Nouragues_FG)	197	Lecythis.persistens	82	68.1		Lowland_trop_rainf_(Saut_Lavilette_FG)	224	Oxandra.asbeckii	124.7
Lowland_trop_rainf_(Nouragues_FG)	197	Lecythis.persistens	91.6	81.1		Lowland_trop_rainf_(Saut_Lavilette_FG)	224	Oxandra.asbeckii	134
Lowland_trop_rainf_(Nouragues_FG)	197	Lecythis.persistens	192	70.5		Lowland_trop_rainf_(Saut_Lavilette_FG)	224	Oxandra.asbeckii	139.5
Lowland_trop_rainf_(Nouragues_FG)	197	Lecythis.persistens	120.1	84.5		Lowland_trop_rainf_(Saut_Lavilette_FG)	224	Oxandra.asbeckii	142.2
Lowland_trop_rainf_(Nouragues_FG)	197	Lecythis.persistens	110.5	54.1		Lowland_trop_rainf_(Saut_Lavilette_FG)	224	Oxandra.asbeckii	96.6
Lowland_trop_rainf_(Nouragues_FG)	197	Lecythis.persistens	129.3	70.1		Lowland_trop_rainf_(Saut_Lavilette_FG)	224	Oxandra.asbeckii	126.4
Lowland_trop_rainf_(Nouragues_FG)	197	Lecythis.persistens	239.6	103.3		Lowland_trop_rainf_(Saut_Lavilette_FG)	224	Oxandra.asbeckii	115.6
Lowland_trop_rainf_(Nouragues_FG)	197	Lecythis.persistens	131.4	107		Lowland_trop_rainf_(Saut_Lavilette_FG)	224	Oxandra.asbeckii	103.5
Lowland_trop_rainf_(Nouragues_FG)	197	Lecythis.persistens	102.3	88		Lowland_trop_rainf_(Saut_Lavilette_FG)	224	Oxandra.asbeckii	159.9
Lowland_trop_rainf_(Nouragues_FG)	197	Lecythis.persistens	140.9	86.8		Lowland_trop_rainf_(Saut_Lavilette_FG)	224	Oxandra.asbeckii	136.4
Lowland_trop_rainf_(Nouragues_FG)	197	Licania.canescens	28.4	95.6		Evergreen_tropical_rainf_(Ecuador)	251	ACALCU	186.395
Lowland_trop_rainf_(Nouragues_FG)	197	Licania.canescens	32.5	109.6		Evergreen_tropical_rainf_(Ecuador)	251	ACALCU	224.07
Lowland_trop_rainf_(Nouragues_FG)	197	Licania.canescens	27.8	109.5		Evergreen_tropical_rainf_(Ecuador)	251	ACALCU	281.825
Lowland_trop_rainf_(Nouragues_FG)	197	Licania.canescens	40.1	135		Evergreen_tropical_rainf_(Ecuador)	251	ACALCU	187.285
Lowland_trop_rainf_(Nouragues_FG)	197	Licania.canescens	22.9	107.2		Evergreen_tropical_rainf_(Ecuador)	251	ACALCU	241.92
Lowland_trop_rainf_(Nouragues_FG)	197	Licania.canescens	26	103.2		Evergreen_tropical_rainf_(Ecuador)	251	ACALCU	244.459
[truncated: 792 more rows]

## Sheet: 10ind_sin rar con rar la
	site	richness	sps					site	richness	sps	la_mean_rar	LS_sin rar			site	richness	sps	LA.mean	LA.sd	cv_la_SIN RAR			site	richness	sps	la_cv_rar	cv_la_SIN RAR
21	Lowland_trop_rainf_(Montagne_Tortue_FG)	213	Astrocaryum.sciophilum				107	Lowland_trop_rainf_(Montagne_Tortue_FG)	213	Astrocaryum.sciophilum	1164.8	1170.72		78	Mount_beech_(Romania)	1	abal	0.343659	0.0653836	19.0257		6	Mount_beech_(Romania)	1	abal	18.7236	19.0257
93	Evergreen_tropical_rainf_(Ecuador)	251	PENTSU				137	Evergreen_tropical_rainf_(Ecuador)	251	PENTSU	967.204	962.831		82	Mount_beech_(Romania)	2	abal	0.431444	0.100231	23.2316		11	Mount_beech_(Romania)	2	abal	22.6314	23.2316
68	Lowland_trop_rainf_(Nouragues_FG)	197	Jessenia.bataua				102	Lowland_trop_rainf_(Nouragues_FG)	197	Jessenia.bataua	632.275	635.4		85	Mount_beech_(Romania)	3	abal	0.448848	0.14366	32.0063		14	Mount_beech_(Romania)	3	abal	29.7284	32.0063
20	Lowland_trop_rainf_(Nouragues_FG)	197	Astrocaryum.sciophilum				98	Lowland_trop_rainf_(Nouragues_FG)	197	Astrocaryum.sciophilum	617.718	616.057		6	Evergreen_tropical_rainf_(Ecuador)	251	ACALCU	80.9475	27.596	34.0912		111	Evergreen_tropical_rainf_(Ecuador)	251	ACALCU	34.0276	34.0912
78	Evergreen_tropical_rainf_(Ecuador)	251	MICOEL				131	Evergreen_tropical_rainf_(Ecuador)	251	MICOEL	304.058	305.303		89	Riparian_chaparral_evergreen_(California)	54	Acer_negundo_var._californicum	20.0117	5.21582	26.0639		50	Riparian_chaparral_evergreen_(California)	54	Acer_negundo_var._californicum	25.4217	26.0639
57	Evergreen_tropical_rainf_(Ecuador)	251	GUARGR				124	Evergreen_tropical_rainf_(Ecuador)	251	GUARGR	262.095	261.746		7	Evergreen_tropical_rainf_(Ecuador)	251	ACIDNI	39.312	8.18796	20.8281		112	Evergreen_tropical_rainf_(Ecuador)	251	ACIDNI	20.5366	20.8281
111	Evergreen_tropical_rainf_(Ecuador)	251	PROTNO				141	Evergreen_tropical_rainf_(Ecuador)	251	PROTNO	234.008	232.823		121	Trop_dry_deciduous_(Bolivia)	34	Acosmium.cardenasii	1.12829	0.520476	46.1297		23	Trop_dry_deciduous_(Bolivia)	34	Acosmium.cardenasii	43.3541	46.1297
79	Evergreen_tropical_rainf_(Ecuador)	251	MICOTI				132	Evergreen_tropical_rainf_(Ecuador)	251	MICOTI	228.639	227.765		79	Mount_beech_(Romania)	1	acps	68.9491	23.4034	33.9431		7	Mount_beech_(Romania)	1	acps	31.4681	33.9431
133	Evergreen_tropical_rainf_(Ecuador)	251	SIPABI				144	Evergreen_tropical_rainf_(Ecuador)	251	SIPABI	214.033	214.81		122	Trop_dry_deciduous_(Bolivia)	34	Actinostemon.concepcionis	8.7909	11.2042	127.452		24	Trop_dry_deciduous_(Bolivia)	34	Actinostemon.concepcionis	119.473	127.452
16	Evergreen_tropical_rainf_(Ecuador)	251	APHECR				116	Evergreen_tropical_rainf_(Ecuador)	251	APHECR	210.467	210.443		90	Riparian_chaparral_evergreen_(California)	54	Adenostoma_fasciculatum	0.0627982	0.0156961	24.9946		51	Riparian_chaparral_evergreen_(California)	54	Adenostoma_fasciculatum	23.4481	24.9946
146	Evergreen_tropical_rainf_(Ecuador)	251	UNONVE				147	Evergreen_tropical_rainf_(Ecuador)	251	UNONVE	191.529	191.418		91	Riparian_chaparral_evergreen_(California)	54	Aesculus_californica	19.4773	8.46232	43.447		52	Riparian_chaparral_evergreen_(California)	54	Aesculus_californica	44.4469	43.447
83	Evergreen_tropical_rainf_(Ecuador)	251	NECTVI				134	Evergreen_tropical_rainf_(Ecuador)	251	NECTVI	165.517	165.764		8	Evergreen_tropical_rainf_(Ecuador)	251	ALLOGL	68.4154	30.8256	45.0565		113	Evergreen_tropical_rainf_(Ecuador)	251	ALLOGL	41.9179	45.0565
123	Lowland_trop_rainf_(Paracaou_FG)	150	Rheedia_madruno				92	Lowland_trop_rainf_(Paracaou_FG)	150	Rheedia_madruno	163.041	163.12		123	Trop_dry_deciduous_(Bolivia)	34	Ampelocera.ruizii	42.5286	7.60256	17.8763		25	Trop_dry_deciduous_(Bolivia)	34	Ampelocera.ruizii	17.1899	17.8763
39	Trop_dry_deciduous_(Bolivia)	34	Combretum.leprosum				35	Trop_dry_deciduous_(Bolivia)	34	Combretum.leprosum	156.979	156.667		9	Evergreen_tropical_rainf_(Ecuador)	251	ANIBRI	78.1487	32.5025	41.5907		114	Evergreen_tropical_rainf_(Ecuador)	251	ANIBRI	41.3952	41.5907
128	Evergreen_tropical_rainf_(Ecuador)	251	SALAAT				143	Evergreen_tropical_rainf_(Ecuador)	251	SALAAT	155.452	155.604		10	Evergreen_tropical_rainf_(Ecuador)	251	APEIME	66.3503	25.8446	38.9518		115	Evergreen_tropical_rainf_(Ecuador)	251	APEIME	38.5941	38.9518
76	Trop_dry_deciduous_(Bolivia)	34	Manihot.guaranitica				39	Trop_dry_deciduous_(Bolivia)	34	Manihot.guaranitica	155.412	154.632		11	Evergreen_tropical_rainf_(Ecuador)	251	APHECR	210.443	48.6082	23.098		116	Evergreen_tropical_rainf_(Ecuador)	251	APHECR	22.6308	23.098
107	Evergreen_tropical_rainf_(Ecuador)	251	PRESSC				140	Evergreen_tropical_rainf_(Ecuador)	251	PRESSC	152.91	152.737		92	Riparian_chaparral_evergreen_(California)	54	Artemisia_californica	0.248017	0.158215	63.7921		53	Riparian_chaparral_evergreen_(California)	54	Artemisia_californica	60.6068	63.7921
103	Trop_dry_deciduous_(Bolivia)	34	Pogonopus.tubulosus				43	Trop_dry_deciduous_(Bolivia)	34	Pogonopus.tubulosus	151.577	151.299		124	Trop_dry_deciduous_(Bolivia)	34	Aspidosperma.cylindrocarpon	37.8584	9.99426	26.3991		26	Trop_dry_deciduous_(Bolivia)	34	Aspidosperma.cylindrocarpon	26.322	26.3991
58	Evergreen_tropical_rainf_(Ecuador)	251	GUARSI				125	Evergreen_tropical_rainf_(Ecuador)	251	GUARSI	132.433	133.261		125	Trop_dry_deciduous_(Bolivia)	34	Aspidosperma.tomentosum	28.9138	12.2533	42.3787		27	Trop_dry_deciduous_(Bolivia)	34	Aspidosperma.tomentosum	42.7738	42.3787
69	Lowland_trop_rainf_(Nouragues_FG)	197	Lecythis.persistens				103	Lowland_trop_rainf_(Nouragues_FG)	197	Lecythis.persistens	124.264	124.464		50	Lowland_trop_rainf_(Nouragues_FG)	197	Astrocaryum.sciophilum	616.057	367.934	59.724		98	Lowland_trop_rainf_(Nouragues_FG)	197	Astrocaryum.sciophilum	38.8272	59.724
63	Evergreen_tropical_rainf_(Ecuador)	251	IRYAHO				127	Evergreen_tropical_rainf_(Ecuador)	251	IRYAHO	114.191	113.501		47	Lowland_trop_rainf_(Montagne_Tortue_FG)	213	Astrocaryum.sciophilum	1170.72	1096.82	93.6873		107	Lowland_trop_rainf_(Montagne_Tortue_FG)	213	Astrocaryum.sciophilum	87.7298	93.6873
135	Trop_dry_deciduous_(Bolivia)	34	Solanum.riparium				45	Trop_dry_deciduous_(Bolivia)	34	Solanum.riparium	110.991	111.113		126	Trop_dry_deciduous_(Bolivia)	34	Astronium.urundeuva	16.4034	5.083	30.9875		28	Trop_dry_deciduous_(Bolivia)	34	Astronium.urundeuva	29.1278	30.9875
85	Evergreen_tropical_rainf_(Ecuador)	251	NEEAPO				136	Evergreen_tropical_rainf_(Ecuador)	251	NEEAPO	109.91	109.951		93	Riparian_chaparral_evergreen_(California)	54	Baccharis_pilularis	1.48568	0.687391	46.2677		54	Riparian_chaparral_evergreen_(California)	54	Baccharis_pilularis	39.8307	46.2677
70	Lowland_trop_rainf_(Paracaou_FG)	150	Lecythis_persistens				89	Lowland_trop_rainf_(Paracaou_FG)	150	Lecythis_persistens	109.5	109.438		1	Boreal_(Finland)	1	BEPE	15.3246	6.44196	42.0369		1	Boreal_(Finland)	1	BEPE	35.7248	42.0369
30	Trop_dry_deciduous_(Bolivia)	34	Capparis.prisca				31	Trop_dry_deciduous_(Bolivia)	34	Capparis.prisca	109.349	108.77		4	Boreal_(Finland)	2	BEPE	14.2087	5.87861	41.3734		4	Boreal_(Finland)	2	BEPE	37.6968	41.3734
45	Evergreen_tropical_rainf_(Ecuador)	251	ESCHCO				120	Evergreen_tropical_rainf_(Ecuador)	251	ESCHCO	107.904	107.842		51	Lowland_trop_rainf_(Nouragues_FG)	197	Bocoa.prouacensis	55.5692	18.7363	33.7171		99	Lowland_trop_rainf_(Nouragues_FG)	197	Bocoa.prouacensis	29.8499	33.7171
67	Trop_dry_deciduous_(Bolivia)	34	Jacaratia.sp.				38	Trop_dry_deciduous_(Bolivia)	34	Jacaratia.sp.	102.523	102.605		127	Trop_dry_deciduous_(Bolivia)	34	Bougainvillea.modesta	26.3737	10.2313	38.7934		29	Trop_dry_deciduous_(Bolivia)	34	Bougainvillea.modesta	38.1229	38.7934
115	Lowland_trop_rainf_(Nouragues_FG)	197	Quararibea.duckei				106	Lowland_trop_rainf_(Nouragues_FG)	197	Quararibea.duckei	97.1891	97.7286		12	Evergreen_tropical_rainf_(Ecuador)	251	BROWGR	61.0527	19.7925	32.4187		117	Evergreen_tropical_rainf_(Ecuador)	251	BROWGR	29.6795	32.4187
46	Lowland_trop_rainf_(Nouragues_FG)	197	Eschweilera.coriacea				100	Lowland_trop_rainf_(Nouragues_FG)	197	Eschweilera.coriacea	91.9037	91.9944		128	Trop_dry_deciduous_(Bolivia)	34	Caesalpinia.pluviosa	4.35209	3.5637	81.8847		30	Trop_dry_deciduous_(Bolivia)	34	Caesalpinia.pluviosa	86.0421	81.8847
47	Lowland_trop_rainf_(Montagne_Tortue_FG)	213	Eschweilera.coriacea				109	Lowland_trop_rainf_(Montagne_Tortue_FG)	213	Eschweilera.coriacea	87.9941	88.12		129	Trop_dry_deciduous_(Bolivia)	34	Capparis.prisca	108.77	51.516	47.3622		31	Trop_dry_deciduous_(Bolivia)	34	Capparis.prisca	46.5389	47.3622
31	Evergreen_tropical_rainf_(Ecuador)	251	CAPPSO				118	Evergreen_tropical_rainf_(Ecuador)	251	CAPPSO	86.7158	86.4176		13	Evergreen_tropical_rainf_(Ecuador)	251	CAPPSO	86.4176	32.5757	37.6956		118	Evergreen_tropical_rainf_(Ecuador)	251	CAPPSO	36.0027	37.6956
38	Evergreen_tropical_rainf_(Ecuador)	251	COCCDE				119	Evergreen_tropical_rainf_(Ecuador)	251	COCCDE	84.3951	84.4945		130	Trop_dry_deciduous_(Bolivia)	34	Casearia.gossypiosperma	24.3485	7.14753	29.3551		32	Trop_dry_deciduous_(Bolivia)	34	Casearia.gossypiosperma	28.9725	29.3551
134	Evergreen_tropical_rainf_(Ecuador)	251	SIPADE				145	Evergreen_tropical_rainf_(Ecuador)	251	SIPADE	82.9338	83.6908		94	Riparian_chaparral_evergreen_(California)	54	Ceanothus_cuneatus_var._cuneatus	0.907992	0.383525	42.2388		55	Riparian_chaparral_evergreen_(California)	54	Ceanothus_cuneatus_var._cuneatus	38.5968	42.2388
72	Evergreen_tropical_rainf_(Ecuador)	251	LICANE				128	Evergreen_tropical_rainf_(Ecuador)	251	LICANE	81.1487	81.1084		131	Trop_dry_deciduous_(Bolivia)	34	Ceiba.samauma	17.7013	8.46345	47.8125		33	Trop_dry_deciduous_(Bolivia)	34	Ceiba.samauma	44.0744	47.8125
4	Evergreen_tropical_rainf_(Ecuador)	251	ACALCU				111	Evergreen_tropical_rainf_(Ecuador)	251	ACALCU	80.7645	80.9475		132	Trop_dry_deciduous_(Bolivia)	34	Centrolobium.microchaete	32.7279	17.9112	54.7276		34	Trop_dry_deciduous_(Bolivia)	34	Centrolobium.microchaete	50.2548	54.7276
94	Evergreen_tropical_rainf_(Ecuador)	251	PEREXA				138	Evergreen_tropical_rainf_(Ecuador)	251	PEREXA	80.1178	80.1664		95	Riparian_chaparral_evergreen_(California)	54	Cercocarpus_betuloides_var._betuloides	1.41447	0.290065	20.5069		56	Riparian_chaparral_evergreen_(California)	54	Cercocarpus_betuloides_var._betuloides	20.3921	20.5069
59	Lowland_trop_rainf_(Nouragues_FG)	197	Gustavia.hexapetala				101	Lowland_trop_rainf_(Nouragues_FG)	197	Gustavia.hexapetala	78.8746	78.75		96	Riparian_chaparral_evergreen_(California)	54	Clematis_lasiantha	6.25047	4.18558	66.9643		57	Riparian_chaparral_evergreen_(California)	54	Clematis_lasiantha	52.0695	66.9643
81	Evergreen_tropical_rainf_(Ecuador)	251	MYRCBL				114	Evergreen_tropical_rainf_(Ecuador)	251	ANIBRI	78.6741	78.1867		14	Evergreen_tropical_rainf_(Ecuador)	251	COCCDE	84.4945	19.0809	22.5824		119	Evergreen_tropical_rainf_(Ecuador)	251	COCCDE	20.8932	22.5824
14	Evergreen_tropical_rainf_(Ecuador)	251	ANIBRI				133	Evergreen_tropical_rainf_(Ecuador)	251	MYRCBL	78.507	78.1487		133	Trop_dry_deciduous_(Bolivia)	34	Combretum.leprosum	156.667	93.9208	59.9494		35	Trop_dry_deciduous_(Bolivia)	34	Combretum.leprosum	58.6062	59.9494
110	Lowland_trop_rainf_(Montagne_Tortue_FG)	213	Protium.opacum				108	Lowland_trop_rainf_(Montagne_Tortue_FG)	213	Protium.opacum	77.6533	77.5909		97	Riparian_chaparral_evergreen_(California)	54	Cotoneaster_pannosa	1.15669	0.337542	29.1816		58	Riparian_chaparral_evergreen_(California)	54	Cotoneaster_pannosa	28.68	29.1816
106	Evergreen_tropical_rainf_(Ecuador)	251	POUTVE				139	Evergreen_tropical_rainf_(Ecuador)	251	POUTVE	75.1242	75.1475		98	Riparian_chaparral_evergreen_(California)	54	Dirca_occidentalis	12.1611	5.6046	46.0864		59	Riparian_chaparral_evergreen_(California)	54	Dirca_occidentalis	45.4464	46.0864
60	Lowland_trop_rainf_(Paracaou_FG)	150	Gustavia_hexapetala				86	Lowland_trop_rainf_(Paracaou_FG)	150	Gustavia_hexapetala	71.5869	71.5783		59	Lowland_trop_rainf_(Paracaou_FG)	150	Eperua_falcata	41.4636	10.2601	24.7449		84	Lowland_trop_rainf_(Paracaou_FG)	150	Eperua_falcata	23.5942	24.7449
104	Lowland_trop_rainf_(Acarouany_FG)	148	Poraqueiba.guianensis				83	Lowland_trop_rainf_(Acarouany_FG)	148	Poraqueiba.guianensis	70.9372	70.8688		60	Lowland_trop_rainf_(Paracaou_FG)	150	Eperua_grandiflora	44.79	16.1085	35.9645		85	Lowland_trop_rainf_(Paracaou_FG)	150	Eperua_grandiflora	34.4859	35.9645
84	Evergreen_tropical_rainf_(Ecuador)	251	NEEABA				135	Evergreen_tropical_rainf_(Ecuador)	251	NEEABA	70.4977	70.4079		134	Trop_dry_deciduous_(Bolivia)	34	Erythroxylum.daphnites	9.57972	3.87196	40.4183		36	Trop_dry_deciduous_(Bolivia)	34	Erythroxylum.daphnites	39.1947	40.4183
56	Evergreen_tropical_rainf_(Ecuador)	251	GUAPCL				123	Evergreen_tropical_rainf_(Ecuador)	251	GUAPCL	70.0207	69.8072		15	Evergreen_tropical_rainf_(Ecuador)	251	ESCHCO	107.842	30.3175	28.1129		120	Evergreen_tropical_rainf_(Ecuador)	251	ESCHCO	25.4711	28.1129
8	Mount_beech_(Romania)	1	acps				7	Mount_beech_(Romania)	1	acps	68.8288	68.9491		52	Lowland_trop_rainf_(Nouragues_FG)	197	Eschweilera.coriacea	91.9944	29.2289	31.7724		100	Lowland_trop_rainf_(Nouragues_FG)	197	Eschweilera.coriacea	30.9538	31.7724
12	Evergreen_tropical_rainf_(Ecuador)	251	ALLOGL				113	Evergreen_tropical_rainf_(Ecuador)	251	ALLOGL	68.1756	68.4154		48	Lowland_trop_rainf_(Montagne_Tortue_FG)	213	Eschweilera.coriacea	88.12	17.2348	19.5583		109	Lowland_trop_rainf_(Montagne_Tortue_FG)	213	Eschweilera.coriacea	18.9165	19.5583
65	Lowland_trop_rainf_(Paracaou_FG)	150	Iryanthera_hostmannii				87	Lowland_trop_rainf_(Paracaou_FG)	150	Iryanthera_hostmannii	66.7816	66.8083		16	Evergreen_tropical_rainf_(Ecuador)	251	EUGEFL	38.5669	11.008	28.5427		121	Evergreen_tropical_rainf_(Ecuador)	251	EUGEFL	27.1719	28.5427
15	Evergreen_tropical_rainf_(Ecuador)	251	APEIME				115	Evergreen_tropical_rainf_(Ecuador)	251	APEIME	66.6797	66.3503		17	Evergreen_tropical_rainf_(Ecuador)	251	FARACA	45.3554	9.84374	21.7036		122	Evergreen_tropical_rainf_(Ecuador)	251	FARACA	21.3647	21.7036
86	Trop_dry_deciduous_(Bolivia)	34	Ouratea.sp.				41	Trop_dry_deciduous_(Bolivia)	34	Ouratea.sp.	65.713	65.173		80	Mount_beech_(Romania)	1	fasy	14.0672	2.83382	20.1449		8	Mount_beech_(Romania)	1	fasy	19.0391	20.1449
105	Lowland_trop_rainf_(Nouragues_FG)	197	Pouteria.gonggrijpii				146	Evergreen_tropical_rainf_(Ecuador)	251	SOROST	63.611	63.7		83	Mount_beech_(Romania)	2	fasy	14.5213	4.52412	31.1551		10	Mount_beech_(Romania)	2	fasy	29.3227	31.1551
136	Evergreen_tropical_rainf_(Ecuador)	251	SOROST				105	Lowland_trop_rainf_(Nouragues_FG)	197	Pouteria.gonggrijpii	63.4673	63.3553		86	Mount_beech_(Romania)	3	fasy	14.5879	3.55165	24.3466		13	Mount_beech_(Romania)	3	fasy	23.1665	24.3466
132	Trop_dry_deciduous_(Bolivia)	34	Simira.rubescens				44	Trop_dry_deciduous_(Bolivia)	34	Simira.rubescens	62.6253	62.85		88	Mount_beech_(Romania)	4	fasy	15.873	2.25408	14.2007		16	Mount_beech_(Romania)	4	fasy	13.7392	14.2007
28	Evergreen_tropical_rainf_(Ecuador)	251	BROWGR				117	Evergreen_tropical_rainf_(Ecuador)	251	BROWGR	61.3874	61.0527		135	Trop_dry_deciduous_(Bolivia)	34	Gallesia.integrifolia	50.1348	16.4116	32.735		37	Trop_dry_deciduous_(Bolivia)	34	Gallesia.integrifolia	32.1898	32.735
131	Lowland_trop_rainf_(Paracaou_FG)	150	Sandwithia_guianensis				93	Lowland_trop_rainf_(Paracaou_FG)	150	Sandwithia_guianensis	55.7465	55.6811		99	Riparian_chaparral_evergreen_(California)	54	Genista_monspessulana	0.888189	0.577752	65.0483		60	Riparian_chaparral_evergreen_(California)	54	Genista_monspessulana	60.9005	65.0483
26	Lowland_trop_rainf_(Nouragues_FG)	197	Bocoa.prouacensis				99	Lowland_trop_rainf_(Nouragues_FG)	197	Bocoa.prouacensis	55.3965	55.5692		18	Evergreen_tropical_rainf_(Ecuador)	251	GUAPCL	69.8072	19.8526	28.4392		123	Evergreen_tropical_rainf_(Ecuador)	251	GUAPCL	27.9831	28.4392
54	Trop_dry_deciduous_(Bolivia)	34	Gallesia.integrifolia				37	Trop_dry_deciduous_(Bolivia)	34	Gallesia.integrifolia	50.4235	50.1348		19	Evergreen_tropical_rainf_(Ecuador)	251	GUARGR	261.746	156.854	59.9261		124	Evergreen_tropical_rainf_(Ecuador)	251	GUARGR	59.8491	59.9261
142	Lowland_trop_rainf_(Paracaou_FG)	150	Tovomita_sp._B1				95	Lowland_trop_rainf_(Paracaou_FG)	150	Tovomita_sp._B1	46.994	46.8538		20	Evergreen_tropical_rainf_(Ecuador)	251	GUARSI	133.261	32.5299	24.4107		125	Evergreen_tropical_rainf_(Ecuador)	251	GUARSI	23.7544	24.4107
62	Evergreen_tropical_rainf_(Ecuador)	251	INGAUM				126	Evergreen_tropical_rainf_(Ecuador)	251	INGAUM	45.7113	45.7556		53	Lowland_trop_rainf_(Nouragues_FG)	197	Gustavia.hexapetala	78.75	25.1622	31.9521		101	Lowland_trop_rainf_(Nouragues_FG)	197	Gustavia.hexapetala	28.9461	31.9521
49	Evergreen_tropical_rainf_(Ecuador)	251	FARACA				122	Evergreen_tropical_rainf_(Ecuador)	251	FARACA	45.3841	45.3554		61	Lowland_trop_rainf_(Paracaou_FG)	150	Gustavia_hexapetala	71.5783	27.5388	38.4736		86	Lowland_trop_rainf_(Paracaou_FG)	150	Gustavia_hexapetala	32.8042	38.4736
43	Lowland_trop_rainf_(Paracaou_FG)	150	Eperua_grandiflora				85	Lowland_trop_rainf_(Paracaou_FG)	150	Eperua_grandiflora	44.8683	44.79		100	Riparian_chaparral_evergreen_(California)	54	Heteromeles_arbutifolia	13.9737	6.05166	43.3073		61	Riparian_chaparral_evergreen_(California)	54	Heteromeles_arbutifolia	42.623	43.3073
119	Riparian_chaparral_evergreen_(California)	54	Quercus_kelloggii				69	Riparian_chaparral_evergreen_(California)	54	Quercus_kelloggii	43.7873	43.6725		21	Evergreen_tropical_rainf_(Ecuador)	251	INGAUM	45.7556	20.4645	44.7256		126	Evergreen_tropical_rainf_(Ecuador)	251	INGAUM	43.0783	44.7256
13	Trop_dry_deciduous_(Bolivia)	34	Ampelocera.ruizii				25	Trop_dry_deciduous_(Bolivia)	34	Ampelocera.ruizii	42.6195	42.5286		22	Evergreen_tropical_rainf_(Ecuador)	251	IRYAHO	113.501	37.2636	32.8311		127	Evergreen_tropical_rainf_(Ecuador)	251	IRYAHO	32.1	32.8311
42	Lowland_trop_rainf_(Paracaou_FG)	150	Eperua_falcata				84	Lowland_trop_rainf_(Paracaou_FG)	150	Eperua_falcata	41.5125	41.4636		45	Lowland_trop_rainf_(BAFOG_FG)	156	Iryanthera.sagotiana	38.935	11.7095	30.0744		97	Lowland_trop_rainf_(BAFOG_FG)	156	Iryanthera.sagotiana	25.7973	30.0744
102	Lowland_trop_rainf_(Paracaou_FG)	150	Pogonophora_schomburgkiana				91	Lowland_trop_rainf_(Paracaou_FG)	150	Pogonophora_schomburgkiana	41.3793	41.25		62	Lowland_trop_rainf_(Paracaou_FG)	150	Iryanthera_hostmannii	66.8083	19.8626	29.7307		87	Lowland_trop_rainf_(Paracaou_FG)	150	Iryanthera_hostmannii	29.3706	29.7307
66	Lowland_trop_rainf_(Paracaou_FG)	150	Iryanthera_sagotiana				88	Lowland_trop_rainf_(Paracaou_FG)	150	Iryanthera_sagotiana	39.3026	39.3857		63	Lowland_trop_rainf_(Paracaou_FG)	150	Iryanthera_sagotiana	39.3857	12.9537	32.8893		88	Lowland_trop_rainf_(Paracaou_FG)	150	Iryanthera_sagotiana	27.9011	32.8893
6	Evergreen_tropical_rainf_(Ecuador)	251	ACIDNI				112	Evergreen_tropical_rainf_(Ecuador)	251	ACIDNI	39.2372	39.312		136	Trop_dry_deciduous_(Bolivia)	34	Jacaratia.sp.	102.605	23.4119	22.8175		38	Trop_dry_deciduous_(Bolivia)	34	Jacaratia.sp.	22.207	22.8175
64	Lowland_trop_rainf_(BAFOG_FG)	156	Iryanthera.sagotiana				97	Lowland_trop_rainf_(BAFOG_FG)	156	Iryanthera.sagotiana	38.9132	38.935		54	Lowland_trop_rainf_(Nouragues_FG)	197	Jessenia.bataua	635.4	286.766	45.1316		102	Lowland_trop_rainf_(Nouragues_FG)	197	Jessenia.bataua	42.8118	45.1316
48	Evergreen_tropical_rainf_(Ecuador)	251	EUGEFL				121	Evergreen_tropical_rainf_(Ecuador)	251	EUGEFL	38.6383	38.5669		55	Lowland_trop_rainf_(Nouragues_FG)	197	Lecythis.persistens	124.464	46.6643	37.4923		103	Lowland_trop_rainf_(Nouragues_FG)	197	Lecythis.persistens	36.0637	37.4923
18	Trop_dry_deciduous_(Bolivia)	34	Aspidosperma.cylindrocarpon				26	Trop_dry_deciduous_(Bolivia)	34	Aspidosperma.cylindrocarpon	37.7861	37.8584		64	Lowland_trop_rainf_(Paracaou_FG)	150	Lecythis_persistens	109.438	26.575	24.2833		89	Lowland_trop_rainf_(Paracaou_FG)	150	Lecythis_persistens	23.8258	24.2833
126	Evergreen_tropical_rainf_(Ecuador)	251	RINOVI				34	Trop_dry_deciduous_(Bolivia)	34	Centrolobium.microchaete	32.7583	32.7331		101	Riparian_chaparral_evergreen_(California)	54	Lepechinia_calycina	12.1592	10.4899	86.2712		62	Riparian_chaparral_evergreen_(California)	54	Lepechinia_calycina	69.2135	86.2712
35	Trop_dry_deciduous_(Bolivia)	34	Centrolobium.microchaete				142	Evergreen_tropical_rainf_(Ecuador)	251	RINOVI	32.7102	32.7279		23	Evergreen_tropical_rainf_(Ecuador)	251	LICANE	81.1084	35.8154	44.1575		128	Evergreen_tropical_rainf_(Ecuador)	251	LICANE	44.4185	44.1575
125	Riparian_chaparral_evergreen_(California)	54	Ribes_sanguineum_var._glutinosum				74	Riparian_chaparral_evergreen_(California)	54	Ribes_sanguineum_var._glutinosum	32.4717	32.4578		56	Lowland_trop_rainf_(Nouragues_FG)	197	Licania.canescens	25.728	6.374	24.7746		104	Lowland_trop_rainf_(Nouragues_FG)	197	Licania.canescens	22.8497	24.7746
137	Trop_dry_deciduous_(Bolivia)	34	Spondias.mombin				46	Trop_dry_deciduous_(Bolivia)	34	Spondias.mombin	30.1205	30.0017		102	Riparian_chaparral_evergreen_(California)	54	Lonicera_hispidula_var._vacillans	6.25022	5.07033	81.1225		63	Riparian_chaparral_evergreen_(California)	54	Lonicera_hispidula_var._vacillans	66.8083	81.1225
19	Trop_dry_deciduous_(Bolivia)	34	Aspidosperma.tomentosum				27	Trop_dry_deciduous_(Bolivia)	34	Aspidosperma.tomentosum	28.9273	28.9138		24	Evergreen_tropical_rainf_(Ecuador)	251	LOZAKL	26.3501	8.66097	32.8688		129	Evergreen_tropical_rainf_(Ecuador)	251	LOZAKL	32.2757	32.8688
120	Riparian_chaparral_evergreen_(California)	54	Quercus_lobata				70	Riparian_chaparral_evergreen_(California)	54	Quercus_lobata	26.6278	26.82		137	Trop_dry_deciduous_(Bolivia)	34	Manihot.guaranitica	154.632	78.4755	50.7499		39	Trop_dry_deciduous_(Bolivia)	34	Manihot.guaranitica	46.7047	50.7499
27	Trop_dry_deciduous_(Bolivia)	34	Bougainvillea.modesta				29	Trop_dry_deciduous_(Bolivia)	34	Bougainvillea.modesta	26.4514	26.3737		25	Evergreen_tropical_rainf_(Ecuador)	251	MARMBA	1.17643	0.831046	70.6412		130	Evergreen_tropical_rainf_(Ecuador)	251	MARMBA	59.6333	70.6412
75	Evergreen_tropical_rainf_(Ecuador)	251	LOZAKL				129	Evergreen_tropical_rainf_(Ecuador)	251	LOZAKL	26.3091	26.3501		26	Evergreen_tropical_rainf_(Ecuador)	251	MICOEL	305.303	175.6	57.5168		131	Evergreen_tropical_rainf_(Ecuador)	251	MICOEL	53.3085	57.5168
73	Lowland_trop_rainf_(Nouragues_FG)	197	Licania.canescens				94	Lowland_trop_rainf_(Paracaou_FG)	150	Tapura_capitulifera	25.6734	25.728		27	Evergreen_tropical_rainf_(Ecuador)	251	MICOTI	227.765	77.2153	33.9014		132	Evergreen_tropical_rainf_(Ecuador)	251	MICOTI	30.0002	33.9014
141	Lowland_trop_rainf_(Paracaou_FG)	150	Tapura_capitulifera				104	Lowland_trop_rainf_(Nouragues_FG)	197	Licania.canescens	25.6561	25.5786		103	Riparian_chaparral_evergreen_(California)	54	Mimulus_aurantiacus	2.33888	1.31524	56.2337		64	Riparian_chaparral_evergreen_(California)	54	Mimulus_aurantiacus	47.9728	56.2337
32	Trop_dry_deciduous_(Bolivia)	34	Casearia.gossypiosperma				32	Trop_dry_deciduous_(Bolivia)	34	Casearia.gossypiosperma	24.4976	24.3485		28	Evergreen_tropical_rainf_(Ecuador)	251	MYRCBL	78.1867	19.6578	25.1421		133	Evergreen_tropical_rainf_(Ecuador)	251	MYRCBL	24.2946	25.1421
88	Lowland_trop_rainf_(Paracaou_FG)	150	Oxandra_asbeckii				90	Lowland_trop_rainf_(Paracaou_FG)	150	Oxandra_asbeckii	23.7566	23.7538		138	Trop_dry_deciduous_(Bolivia)	34	Myrciaria.cauliflora	2.99159	1.16353	38.8932		40	Trop_dry_deciduous_(Bolivia)	34	Myrciaria.cauliflora	35.983	38.8932
87	Lowland_trop_rainf_(Saut_Lavilette_FG)	224	Oxandra.asbeckii				110	Lowland_trop_rainf_(Saut_Lavilette_FG)	224	Oxandra.asbeckii	21.7064	21.7679		29	Evergreen_tropical_rainf_(Ecuador)	251	NECTVI	165.764	35.7697	21.5787		134	Evergreen_tropical_rainf_(Ecuador)	251	NECTVI	20.9449	21.5787
5	Riparian_chaparral_evergreen_(California)	54	Acer_negundo_var._californicum				50	Riparian_chaparral_evergreen_(California)	54	Acer_negundo_var._californicum	19.927	20.0117		30	Evergreen_tropical_rainf_(Ecuador)	251	NEEABA	70.4079	19.5447	27.7592		135	Evergreen_tropical_rainf_(Ecuador)	251	NEEABA	26.7303	27.7592
129	Riparian_chaparral_evergreen_(California)	54	Salix_lucida_ssp._lasiandra				76	Riparian_chaparral_evergreen_(California)	54	Salix_lucida_ssp._lasiandra	19.7589	19.7487		31	Evergreen_tropical_rainf_(Ecuador)	251	NEEAPO	109.951	35.6976	32.467		136	Evergreen_tropical_rainf_(Ecuador)	251	NEEAPO	31.3976	32.467
11	Riparian_chaparral_evergreen_(California)	54	Aesculus_californica				52	Riparian_chaparral_evergreen_(California)	54	Aesculus_californica	19.4506	19.4773		139	Trop_dry_deciduous_(Bolivia)	34	Ouratea.sp.	65.173	56.8898	87.2905		41	Trop_dry_deciduous_(Bolivia)	34	Ouratea.sp.	70.512	87.2905
34	Trop_dry_deciduous_(Bolivia)	34	Ceiba.samauma				33	Trop_dry_deciduous_(Bolivia)	34	Ceiba.samauma	17.613	17.7013		71	Lowland_trop_rainf_(Saut_Lavilette_FG)	224	Oxandra.asbeckii	21.7679	4.00167	18.3834		110	Lowland_trop_rainf_(Saut_Lavilette_FG)	224	Oxandra.asbeckii	17.4812	18.3834
108	Lowland_trop_rainf_(Acarouany_FG)	148	Protium.gallicum				82	Lowland_trop_rainf_(Acarouany_FG)	148	Protium.gallicum	16.957	16.9773		65	Lowland_trop_rainf_(Paracaou_FG)	150	Oxandra_asbeckii	23.7538	6.25998	26.3535		90	Lowland_trop_rainf_(Paracaou_FG)	150	Oxandra_asbeckii	23.7714	26.3535
145	Riparian_chaparral_evergreen_(California)	54	Umbellularia_californica				81	Riparian_chaparral_evergreen_(California)	54	Umbellularia_californica	16.591	16.6304		72	Medit_mixed_(Spain)	1	P.nigra	0.794444	0.145823	18.3554		17	Medit_mixed_(Spain)	1	P.nigra	16.6394	18.3554
22	Trop_dry_deciduous_(Bolivia)	34	Astronium.urundeuva				28	Trop_dry_deciduous_(Bolivia)	34	Astronium.urundeuva	16.3979	16.4034		73	Medit_mixed_(Spain)	2	P.nigra	0.785857	0.179614	22.8559		18	Medit_mixed_(Spain)	2	P.nigra	21.6656	22.8559
53	Mount_beech_(Romania)	4	fasy				16	Mount_beech_(Romania)	4	fasy	15.8444	15.873		77	Medit_mixed_(Spain)	3	P.nigra	0.992667	0.21252	21.409		22	Medit_mixed_(Spain)	3	P.nigra	20.3073	21.409
127	Riparian_chaparral_evergreen_(California)	54	Rubus_ursinus				75	Riparian_chaparral_evergreen_(California)	54	Rubus_ursinus	15.7004	15.865		74	Medit_mixed_(Spain)	2	P.sylvestris	0.356923	0.102835	28.8115		19	Medit_mixed_(Spain)	2	P.sylvestris	27.1247	28.8115
24	Boreal_(Finland)	1	BEPE				1	Boreal_(Finland)	1	BEPE	15.2449	15.3246		32	Evergreen_tropical_rainf_(Ecuador)	251	PENTSU	962.831	709.677	73.7073		137	Evergreen_tropical_rainf_(Ecuador)	251	PENTSU	67.4925	73.7073
147	Trop_dry_deciduous_(Bolivia)	34	Zanthoxylum.monogynum...................				49	Trop_dry_deciduous_(Bolivia)	34	Zanthoxylum.monogynum...................	15.2204	15.1557		33	Evergreen_tropical_rainf_(Ecuador)	251	PEREXA	80.1664	33.6042	41.9181		138	Evergreen_tropical_rainf_(Ecuador)	251	PEREXA	37.1241	41.9181
144	Trop_dry_deciduous_(Bolivia)	34	Trichilia.elegans				48	Trop_dry_deciduous_(Bolivia)	34	Trichilia.elegans	15.1417	15.0969		140	Trop_dry_deciduous_(Bolivia)	34	Phyllostylon.rhamnoides	12.7419	4.51867	35.463		42	Trop_dry_deciduous_(Bolivia)	34	Phyllostylon.rhamnoides	33.3984	35.463
52	Mount_beech_(Romania)	3	fasy				13	Mount_beech_(Romania)	3	fasy	14.5965	14.5879		2	Boreal_(Finland)	1	PIAB	0.115173	0.0210806	18.3034		3	Boreal_(Finland)	1	PIAB	17.6392	18.3034
51	Mount_beech_(Romania)	2	fasy				10	Mount_beech_(Romania)	2	fasy	14.4854	14.5213		81	Mount_beech_(Romania)	1	piab	0.122865	0.0221503	18.0282		9	Mount_beech_(Romania)	1	piab	17.3146	18.0282
25	Boreal_(Finland)	2	BEPE				4	Boreal_(Finland)	2	BEPE	14.2908	14.2087		5	Boreal_(Finland)	2	PIAB	0.115895	0.0283175	24.4337		5	Boreal_(Finland)	2	PIAB	22.4912	24.4337
50	Mount_beech_(Romania)	1	fasy				8	Mount_beech_(Romania)	1	fasy	14.0418	14.0672		84	Mount_beech_(Romania)	2	piab	0.134074	0.038535	28.7415		12	Mount_beech_(Romania)	2	piab	27.3496	28.7415
61	Riparian_chaparral_evergreen_(California)	54	Heteromeles_arbutifolia				61	Riparian_chaparral_evergreen_(California)	54	Heteromeles_arbutifolia	13.8904	13.9737		87	Mount_beech_(Romania)	3	piab	0.158474	0.0433477	27.3532		15	Mount_beech_(Romania)	3	piab	24.3359	27.3532
109	Lowland_trop_rainf_(BAFOG_FG)	156	Protium.gallicum				96	Lowland_trop_rainf_(BAFOG_FG)	156	Protium.gallicum	13.7818	13.776		3	Boreal_(Finland)	1	PISY	0.497888	0.134756	27.0655		2	Boreal_(Finland)	1	PISY	25.1342	27.0655
95	Trop_dry_deciduous_(Bolivia)	34	Phyllostylon.rhamnoides				42	Trop_dry_deciduous_(Bolivia)	34	Phyllostylon.rhamnoides	12.6641	12.7419		66	Lowland_trop_rainf_(Paracaou_FG)	150	Pogonophora_schomburgkiana	41.25	15.06	36.509		91	Lowland_trop_rainf_(Paracaou_FG)	150	Pogonophora_schomburgkiana	36.2358	36.509
41	Riparian_chaparral_evergreen_(California)	54	Dirca_occidentalis				62	Riparian_chaparral_evergreen_(California)	54	Lepechinia_calycina	12.2974	12.1611		141	Trop_dry_deciduous_(Bolivia)	34	Pogonopus.tubulosus	151.299	67.2842	44.4711		43	Trop_dry_deciduous_(Bolivia)	34	Pogonopus.tubulosus	42.9357	44.4711
71	Riparian_chaparral_evergreen_(California)	54	Lepechinia_calycina				59	Riparian_chaparral_evergreen_(California)	54	Dirca_occidentalis	12.2476	12.1592		43	Lowland_trop_rainf_(Acarouany_FG)	148	Poraqueiba.guianensis	70.8688	10.9957	15.5156		83	Lowland_trop_rainf_(Acarouany_FG)	148	Poraqueiba.guianensis	14.9909	15.5156
121	Riparian_chaparral_evergreen_(California)	54	Rhamnus_californica_ssp._californica				71	Riparian_chaparral_evergreen_(California)	54	Rhamnus_californica_ssp._californica	11.4416	11.4204		57	Lowland_trop_rainf_(Nouragues_FG)	197	Pouteria.gonggrijpii	63.7	16.356	25.6766		105	Lowland_trop_rainf_(Nouragues_FG)	197	Pouteria.gonggrijpii	25.4354	25.6766
116	Riparian_chaparral_evergreen_(California)	54	Quercus_agrifolia__var._agrifolia				66	Riparian_chaparral_evergreen_(California)	54	Quercus_agrifolia__var._agrifolia	11.0712	11.0448		34	Evergreen_tropical_rainf_(Ecuador)	251	POUTVE	75.1475	25.1877	33.5176		139	Evergreen_tropical_rainf_(Ecuador)	251	POUTVE	33.4569	33.5176
130	Riparian_chaparral_evergreen_(California)	54	Sambucus_mexicana				77	Riparian_chaparral_evergreen_(California)	54	Sambucus_mexicana	11.0378	10.9679		35	Evergreen_tropical_rainf_(Ecuador)	251	PRESSC	152.737	57.6031	37.7139		140	Evergreen_tropical_rainf_(Ecuador)	251	PRESSC	37.3632	37.7139
143	Riparian_chaparral_evergreen_(California)	54	Toxicodendron_diversilobum				80	Riparian_chaparral_evergreen_(California)	54	Toxicodendron_diversilobum	10.6016	10.5302		44	Lowland_trop_rainf_(Acarouany_FG)	148	Protium.gallicum	16.9773	4.81653	28.3705		82	Lowland_trop_rainf_(Acarouany_FG)	148	Protium.gallicum	24.5614	28.3705
117	Riparian_chaparral_evergreen_(California)	54	Quercus_douglasii				67	Riparian_chaparral_evergreen_(California)	54	Quercus_douglasii	10.3253	10.3504		46	Lowland_trop_rainf_(BAFOG_FG)	156	Protium.gallicum	13.776	3.4119	24.767		96	Lowland_trop_rainf_(BAFOG_FG)	156	Protium.gallicum	23.5399	24.767
44	Trop_dry_deciduous_(Bolivia)	34	Erythroxylum.daphnites				36	Trop_dry_deciduous_(Bolivia)	34	Erythroxylum.daphnites	9.58012	9.57972		49	Lowland_trop_rainf_(Montagne_Tortue_FG)	213	Protium.opacum	77.5909	31.6009	40.7276		108	Lowland_trop_rainf_(Montagne_Tortue_FG)	213	Protium.opacum	38.2096	40.7276
9	Trop_dry_deciduous_(Bolivia)	34	Actinostemon.concepcionis				24	Trop_dry_deciduous_(Bolivia)	34	Actinostemon.concepcionis	8.54233	8.7909		36	Evergreen_tropical_rainf_(Ecuador)	251	PROTNO	232.823	83.2389	35.752		141	Evergreen_tropical_rainf_(Ecuador)	251	PROTNO	32.5569	35.752
112	Riparian_chaparral_evergreen_(California)	54	Prunus_ilicifolia_ssp._ilicifolia				65	Riparian_chaparral_evergreen_(California)	54	Prunus_ilicifolia_ssp._ilicifolia	6.98337	6.94589		104	Riparian_chaparral_evergreen_(California)	54	Prunus_ilicifolia_ssp._ilicifolia	6.94589	3.7847	54.4883		65	Riparian_chaparral_evergreen_(California)	54	Prunus_ilicifolia_ssp._ilicifolia	50.1531	54.4883
37	Riparian_chaparral_evergreen_(California)	54	Clematis_lasiantha				57	Riparian_chaparral_evergreen_(California)	54	Clematis_lasiantha	6.26886	6.25047		75	Medit_mixed_(Spain)	2	Q.faginea	3.09738	0.884325	28.5507		20	Medit_mixed_(Spain)	2	Q.faginea	27.2865	28.5507
74	Riparian_chaparral_evergreen_(California)	54	Lonicera_hispidula_var._vacillans				63	Riparian_chaparral_evergreen_(California)	54	Lonicera_hispidula_var._vacillans	6.19266	6.25022		76	Medit_mixed_(Spain)	2	Q.ilex	3.96906	2.01874	50.862		21	Medit_mixed_(Spain)	2	Q.ilex	34.2908	50.862
138	Trop_dry_deciduous_(Bolivia)	34	Sweetia.fruticosa				78	Riparian_chaparral_evergreen_(California)	54	Symphoricarpos_albus_var._laevigatus	5.41003	5.41874		58	Lowland_trop_rainf_(Nouragues_FG)	197	Quararibea.duckei	97.7286	27.8769	28.5248		106	Lowland_trop_rainf_(Nouragues_FG)	197	Quararibea.duckei	26.9934	28.5248
139	Riparian_chaparral_evergreen_(California)	54	Symphoricarpos_albus_var._laevigatus				47	Trop_dry_deciduous_(Bolivia)	34	Sweetia.fruticosa	5.38629	5.36284		105	Riparian_chaparral_evergreen_(California)	54	Quercus_agrifolia__var._agrifolia	11.0448	5.19418	47.0284		66	Riparian_chaparral_evergreen_(California)	54	Quercus_agrifolia__var._agrifolia	43.5403	47.0284
140	Riparian_chaparral_evergreen_(California)	54	Symphoricarpos_mollis				79	Riparian_chaparral_evergreen_(California)	54	Symphoricarpos_mollis	4.94275	4.87851		106	Riparian_chaparral_evergreen_(California)	54	Quercus_douglasii	10.3504	4.32992	41.8335		67	Riparian_chaparral_evergreen_(California)	54	Quercus_douglasii	40.481	41.8335
29	Trop_dry_deciduous_(Bolivia)	34	Caesalpinia.pluviosa				30	Trop_dry_deciduous_(Bolivia)	34	Caesalpinia.pluviosa	4.41044	4.35209		107	Riparian_chaparral_evergreen_(California)	54	Quercus_durata_var._durata	3.1655	1.33751	42.2529		68	Riparian_chaparral_evergreen_(California)	54	Quercus_durata_var._durata	38.5823	42.2529
114	Medit_mixed_(Spain)	2	Q.ilex				21	Medit_mixed_(Spain)	2	Q.ilex	3.96606	3.96906		108	Riparian_chaparral_evergreen_(California)	54	Quercus_kelloggii	43.6725	13.4161	30.7198		69	Riparian_chaparral_evergreen_(California)	54	Quercus_kelloggii	30.7968	30.7198
118	Riparian_chaparral_evergreen_(California)	54	Quercus_durata_var._durata				68	Riparian_chaparral_evergreen_(California)	54	Quercus_durata_var._durata	3.17551	3.1655		109	Riparian_chaparral_evergreen_(California)	54	Quercus_lobata	26.82	22.8022	85.0193		70	Riparian_chaparral_evergreen_(California)	54	Quercus_lobata	72.4656	85.0193
113	Medit_mixed_(Spain)	2	Q.faginea				20	Medit_mixed_(Spain)	2	Q.faginea	3.09563	3.09738		110	Riparian_chaparral_evergreen_(California)	54	Rhamnus_californica_ssp._californica	11.4204	2.85309	24.9825		71	Riparian_chaparral_evergreen_(California)	54	Rhamnus_californica_ssp._californica	24.739	24.9825
124	Riparian_chaparral_evergreen_(California)	54	Ribes_californicum_var._californicum				73	Riparian_chaparral_evergreen_(California)	54	Ribes_californicum_var._californicum	3.08781	3.00534		111	Riparian_chaparral_evergreen_(California)	54	Rhamnus_crocea	1.14329	0.940939	82.3009		72	Riparian_chaparral_evergreen_(California)	54	Rhamnus_crocea	62.2304	82.3009
82	Trop_dry_deciduous_(Bolivia)	34	Myrciaria.cauliflora				40	Trop_dry_deciduous_(Bolivia)	34	Myrciaria.cauliflora	3.00147	2.99159		67	Lowland_trop_rainf_(Paracaou_FG)	150	Rheedia_madruno	163.12	64.5446	39.5688		92	Lowland_trop_rainf_(Paracaou_FG)	150	Rheedia_madruno	37.3257	39.5688
80	Riparian_chaparral_evergreen_(California)	54	Mimulus_aurantiacus				64	Riparian_chaparral_evergreen_(California)	54	Mimulus_aurantiacus	2.33733	2.33888		112	Riparian_chaparral_evergreen_(California)	54	Ribes_californicum_var._californicum	3.00534	2.80227	93.2431		73	Riparian_chaparral_evergreen_(California)	54	Ribes_californicum_var._californicum	56.5049	93.2431
23	Riparian_chaparral_evergreen_(California)	54	Baccharis_pilularis				54	Riparian_chaparral_evergreen_(California)	54	Baccharis_pilularis	1.4779	1.48568		113	Riparian_chaparral_evergreen_(California)	54	Ribes_sanguineum_var._glutinosum	32.4578	16.62	51.2049		74	Riparian_chaparral_evergreen_(California)	54	Ribes_sanguineum_var._glutinosum	50.9745	51.2049
36	Riparian_chaparral_evergreen_(California)	54	Cercocarpus_betuloides_var._betuloides				56	Riparian_chaparral_evergreen_(California)	54	Cercocarpus_betuloides_var._betuloides	1.41784	1.41447		37	Evergreen_tropical_rainf_(Ecuador)	251	RINOVI	32.7331	9.06955	27.7076		142	Evergreen_tropical_rainf_(Ecuador)	251	RINOVI	26.7177	27.7076
77	Evergreen_tropical_rainf_(Ecuador)	251	MARMBA				130	Evergreen_tropical_rainf_(Ecuador)	251	MARMBA	1.19187	1.17643		114	Riparian_chaparral_evergreen_(California)	54	Rubus_ursinus	15.865	7.45137	46.9673		75	Riparian_chaparral_evergreen_(California)	54	Rubus_ursinus	44.2557	46.9673
40	Riparian_chaparral_evergreen_(California)	54	Cotoneaster_pannosa				72	Riparian_chaparral_evergreen_(California)	54	Rhamnus_crocea	1.159	1.15669		38	Evergreen_tropical_rainf_(Ecuador)	251	SALAAT	155.604	46.9649	30.1823		143	Evergreen_tropical_rainf_(Ecuador)	251	SALAAT	28.0528	30.1823
122	Riparian_chaparral_evergreen_(California)	54	Rhamnus_crocea				58	Riparian_chaparral_evergreen_(California)	54	Cotoneaster_pannosa	1.15554	1.14329		115	Riparian_chaparral_evergreen_(California)	54	Salix_lucida_ssp._lasiandra	19.7487	6.81122	34.4895		76	Riparian_chaparral_evergreen_(California)	54	Salix_lucida_ssp._lasiandra	32.5404	34.4895
7	Trop_dry_deciduous_(Bolivia)	34	Acosmium.cardenasii				23	Trop_dry_deciduous_(Bolivia)	34	Acosmium.cardenasii	1.13554	1.12829		116	Riparian_chaparral_evergreen_(California)	54	Sambucus_mexicana	10.9679	10.0791	91.8965		77	Riparian_chaparral_evergreen_(California)	54	Sambucus_mexicana	86.047	91.8965
91	Medit_mixed_(Spain)	3	P.nigra				22	Medit_mixed_(Spain)	3	P.nigra	0.99207	0.992667		68	Lowland_trop_rainf_(Paracaou_FG)	150	Sandwithia_guianensis	55.6811	25.7867	46.3115		93	Lowland_trop_rainf_(Paracaou_FG)	150	Sandwithia_guianensis	41.6246	46.3115
33	Riparian_chaparral_evergreen_(California)	54	Ceanothus_cuneatus_var._cuneatus				55	Riparian_chaparral_evergreen_(California)	54	Ceanothus_cuneatus_var._cuneatus	0.911209	0.907992		142	Trop_dry_deciduous_(Bolivia)	34	Simira.rubescens	62.85	30.0734	47.8494		44	Trop_dry_deciduous_(Bolivia)	34	Simira.rubescens	42.2596	47.8494
55	Riparian_chaparral_evergreen_(California)	54	Genista_monspessulana				60	Riparian_chaparral_evergreen_(California)	54	Genista_monspessulana	0.88521	0.888189		39	Evergreen_tropical_rainf_(Ecuador)	251	SIPABI	214.81	105.751	49.2301		144	Evergreen_tropical_rainf_(Ecuador)	251	SIPABI	43.7624	49.2301
89	Medit_mixed_(Spain)	1	P.nigra				17	Medit_mixed_(Spain)	1	P.nigra	0.794661	0.794444		40	Evergreen_tropical_rainf_(Ecuador)	251	SIPADE	83.6908	42.7711	51.1061		145	Evergreen_tropical_rainf_(Ecuador)	251	SIPADE	49.2422	51.1061
90	Medit_mixed_(Spain)	2	P.nigra				18	Medit_mixed_(Spain)	2	P.nigra	0.785188	0.785857		143	Trop_dry_deciduous_(Bolivia)	34	Solanum.riparium	111.113	67.2887	60.5587		45	Trop_dry_deciduous_(Bolivia)	34	Solanum.riparium	55.9455	60.5587
101	Boreal_(Finland)	1	PISY				2	Boreal_(Finland)	1	PISY	0.49585	0.497888		41	Evergreen_tropical_rainf_(Ecuador)	251	SOROST	63.3553	30.8037	48.6206		146	Evergreen_tropical_rainf_(Ecuador)	251	SOROST	41.7064	48.6206
3	Mount_beech_(Romania)	3	abal				14	Mount_beech_(Romania)	3	abal	0.449573	0.448848		144	Trop_dry_deciduous_(Bolivia)	34	Spondias.mombin	30.0017	9.91402	33.0448		46	Trop_dry_deciduous_(Bolivia)	34	Spondias.mombin	32.7321	33.0448
2	Mount_beech_(Romania)	2	abal				11	Mount_beech_(Romania)	2	abal	0.433165	0.431444		145	Trop_dry_deciduous_(Bolivia)	34	Sweetia.fruticosa	5.41874	1.95924	36.1568		47	Trop_dry_deciduous_(Bolivia)	34	Sweetia.fruticosa	31.0606	36.1568
92	Medit_mixed_(Spain)	2	P.sylvestris				19	Medit_mixed_(Spain)	2	P.sylvestris	0.356602	0.356923		117	Riparian_chaparral_evergreen_(California)	54	Symphoricarpos_albus_var._laevigatus	5.36284	2.76634	51.5835		78	Riparian_chaparral_evergreen_(California)	54	Symphoricarpos_albus_var._laevigatus	46.3809	51.5835
1	Mount_beech_(Romania)	1	abal				6	Mount_beech_(Romania)	1	abal	0.343017	0.343659		118	Riparian_chaparral_evergreen_(California)	54	Symphoricarpos_mollis	4.87851	3.24558	66.5281		79	Riparian_chaparral_evergreen_(California)	54	Symphoricarpos_mollis	47.4417	66.5281
17	Riparian_chaparral_evergreen_(California)	54	Artemisia_californica				53	Riparian_chaparral_evergreen_(California)	54	Artemisia_californica	0.247663	0.248017		69	Lowland_trop_rainf_(Paracaou_FG)	150	Tapura_capitulifera	25.5786	7.99896	31.2721		94	Lowland_trop_rainf_(Paracaou_FG)	150	Tapura_capitulifera	30.9827	31.2721
98	Mount_beech_(Romania)	3	piab				15	Mount_beech_(Romania)	3	piab	0.15853	0.158474		70	Lowland_trop_rainf_(Paracaou_FG)	150	Tovomita_sp._B1	46.8538	14.1057	30.1058		95	Lowland_trop_rainf_(Paracaou_FG)	150	Tovomita_sp._B1	27.8881	30.1058
97	Mount_beech_(Romania)	2	piab				12	Mount_beech_(Romania)	2	piab	0.134543	0.134074		119	Riparian_chaparral_evergreen_(California)	54	Toxicodendron_diversilobum	10.5302	5.61162	53.2907		80	Riparian_chaparral_evergreen_(California)	54	Toxicodendron_diversilobum	47.8363	53.2907
96	Mount_beech_(Romania)	1	piab				9	Mount_beech_(Romania)	1	piab	0.122891	0.122865		146	Trop_dry_deciduous_(Bolivia)	34	Trichilia.elegans	15.0969	5.70011	37.7569		48	Trop_dry_deciduous_(Bolivia)	34	Trichilia.elegans	36.3481	37.7569
100	Boreal_(Finland)	2	PIAB				3	Boreal_(Finland)	1	PIAB	0.115541	0.115895		120	Riparian_chaparral_evergreen_(California)	54	Umbellularia_californica	16.6304	4.71007	28.322		81	Riparian_chaparral_evergreen_(California)	54	Umbellularia_californica	26.4921	28.322
99	Boreal_(Finland)	1	PIAB				5	Boreal_(Finland)	2	PIAB	0.115198	0.115173		42	Evergreen_tropical_rainf_(Ecuador)	251	UNONVE	191.418	44.59	23.2945		147	Evergreen_tropical_rainf_(Ecuador)	251	UNONVE	22.6996	23.2945
10	Riparian_chaparral_evergreen_(California)	54	Adenostoma_fasciculatum				51	Riparian_chaparral_evergreen_(California)	54	Adenostoma_fasciculatum	0.0629891	0.0627982		147	Trop_dry_deciduous_(Bolivia)	34	Zanthoxylum.monogynum...................	15.1557	6.23247	41.123		49	Trop_dry_deciduous_(Bolivia)	34	Zanthoxylum.monogynum...................	39.084	41.123

## Sheet: SLA_10ind
	site	richness	sps	SLA_MEAN SIN RAR				site	richness	sps	sla_mean_RARI	SLA_MEAN SIN RAR				site	richness	sps	SLA.mean	SLA.sd	cv_sla				site	richness	sps	sla_cv_rari	cv_sla_sin rari
62	Trop_dry_deciduous_(Bolivia)	34	Jacaratia.sp.	521.917			38	Trop_dry_deciduous_(Bolivia)	34	Jacaratia.sp.	523.166	521.917			77	Mount_beech_(Romania)	1	abal	95.5551	20.6329	21.5927			6	Mount_beech_(Romania)	1	abal	21.122	21.5927
49	Mount_beech_(Romania)	4	fasy	420.692			16	Mount_beech_(Romania)	4	fasy	420.519	420.692			81	Mount_beech_(Romania)	2	abal	86.7611	9.78241	11.2751			11	Mount_beech_(Romania)	2	abal	10.9922	11.2751
13	Evergreen_tropical_rainf_(Ecuador)	251	APEIME	411.543			107	Evergreen_tropical_rainf_(Ecuador)	251	APEIME	413.634	411.543			84	Mount_beech_(Romania)	3	abal	90.0861	11.4536	12.714			14	Mount_beech_(Romania)	3	abal	12.4707	12.714
47	Mount_beech_(Romania)	2	fasy	395.616			10	Mount_beech_(Romania)	2	fasy	396.61	395.616			6	Evergreen_tropical_rainf_(Ecuador)	251	ACALCU	225.094	33.9948	15.1025			103	Evergreen_tropical_rainf_(Ecuador)	251	ACALCU	14.9207	15.1025
48	Mount_beech_(Romania)	3	fasy	394.093			13	Mount_beech_(Romania)	3	fasy	392.997	394.093			7	Evergreen_tropical_rainf_(Ecuador)	251	ACIDNI	263.541	46.8937	17.7937			104	Evergreen_tropical_rainf_(Ecuador)	251	ACIDNI	15.6607	17.7937
46	Mount_beech_(Romania)	1	fasy	378.158			8	Mount_beech_(Romania)	1	fasy	379.495	378.158			112	Trop_dry_deciduous_(Bolivia)	34	Acosmium.cardenasii	172.341	22.6498	13.1424			23	Trop_dry_deciduous_(Bolivia)	34	Acosmium.cardenasii	12.9947	13.1424
131	Riparian_chaparral_evergreen_(California)	54	Symphoricarpos_albus_var._laevigatus	363.439			72	Riparian_chaparral_evergreen_(California)	54	Symphoricarpos_mollis	364.823	363.439			78	Mount_beech_(Romania)	1	acps	343.062	33.2867	9.70284			7	Mount_beech_(Romania)	1	acps	9.30117	9.70284
132	Riparian_chaparral_evergreen_(California)	54	Symphoricarpos_mollis	363.184			71	Riparian_chaparral_evergreen_(California)	54	Symphoricarpos_albus_var._laevigatus	361.147	363.184			113	Trop_dry_deciduous_(Bolivia)	34	Actinostemon.concepcionis	284.818	77.3414	27.1546			24	Trop_dry_deciduous_(Bolivia)	34	Actinostemon.concepcionis	22.8043	27.1546
7	Mount_beech_(Romania)	1	acps	343.062			7	Mount_beech_(Romania)	1	acps	343.587	343.062			88	Riparian_chaparral_evergreen_(California)	54	Adenostoma_fasciculatum	57.6841	8.85476	15.3504			50	Riparian_chaparral_evergreen_(California)	54	Adenostoma_fasciculatum	12.797	15.3504
119	Riparian_chaparral_evergreen_(California)	54	Ribes_sanguineum_var._glutinosum	342.646			69	Riparian_chaparral_evergreen_(California)	54	Ribes_sanguineum_var._glutinosum	341.826	342.646			8	Evergreen_tropical_rainf_(Ecuador)	251	ALLOGL	191.625	29.9625	15.636			105	Evergreen_tropical_rainf_(Ecuador)	251	ALLOGL	15.3782	15.636
8	Trop_dry_deciduous_(Bolivia)	34	Actinostemon.concepcionis	284.818			24	Trop_dry_deciduous_(Bolivia)	34	Actinostemon.concepcionis	285.308	284.818			114	Trop_dry_deciduous_(Bolivia)	34	Ampelocera.ruizii	165.191	10.8233	6.55197			25	Trop_dry_deciduous_(Bolivia)	34	Ampelocera.ruizii	6.16284	6.55197
5	Evergreen_tropical_rainf_(Ecuador)	251	ACIDNI	263.541			104	Evergreen_tropical_rainf_(Ecuador)	251	ACIDNI	262.955	263.541			9	Evergreen_tropical_rainf_(Ecuador)	251	ANIBRI	140.42	24.7695	17.6396			106	Evergreen_tropical_rainf_(Ecuador)	251	ANIBRI	17.0577	17.6396
97	Trop_dry_deciduous_(Bolivia)	34	Pogonopus.tubulosus	255.948			43	Trop_dry_deciduous_(Bolivia)	34	Pogonopus.tubulosus	256.258	255.948			10	Evergreen_tropical_rainf_(Ecuador)	251	APEIME	411.543	91.5829	22.2536			107	Evergreen_tropical_rainf_(Ecuador)	251	APEIME	21.1786	22.2536
22	Boreal_(Finland)	1	BEPE	241.905			1	Boreal_(Finland)	1	BEPE	242.073	241.905			11	Evergreen_tropical_rainf_(Ecuador)	251	APHECR	236.462	60.5848	25.6214			108	Evergreen_tropical_rainf_(Ecuador)	251	APHECR	23.8672	25.6214
33	Trop_dry_deciduous_(Bolivia)	34	Centrolobium.microchaete	240.301			34	Trop_dry_deciduous_(Bolivia)	34	Centrolobium.microchaete	240.989	240.301			89	Riparian_chaparral_evergreen_(California)	54	Artemisia_californica	109.431	22.0572	20.1563			51	Riparian_chaparral_evergreen_(California)	54	Artemisia_californica	19.3477	20.1563
23	Boreal_(Finland)	2	BEPE	239.066			4	Boreal_(Finland)	2	BEPE	239.01	239.066			115	Trop_dry_deciduous_(Bolivia)	34	Aspidosperma.cylindrocarpon	136.27	35.1487	25.7934			26	Trop_dry_deciduous_(Bolivia)	34	Aspidosperma.cylindrocarpon	25.4207	25.7934
14	Evergreen_tropical_rainf_(Ecuador)	251	APHECR	236.462			108	Evergreen_tropical_rainf_(Ecuador)	251	APHECR	237.072	236.462			116	Trop_dry_deciduous_(Bolivia)	34	Aspidosperma.tomentosum	153.581	27.4528	17.8752			27	Trop_dry_deciduous_(Bolivia)	34	Aspidosperma.tomentosum	16.9941	17.8752
37	Riparian_chaparral_evergreen_(California)	54	Dirca_occidentalis	234.25			55	Riparian_chaparral_evergreen_(California)	54	Dirca_occidentalis	234.417	234.25			49	Lowland_trop_rainf_(Nouragues_FG)	197	Astrocaryum.sciophilum	63.5762	29.4508	46.3236			90	Lowland_trop_rainf_(Nouragues_FG)	197	Astrocaryum.sciophilum	30.0948	46.3236
71	Trop_dry_deciduous_(Bolivia)	34	Manihot.guaranitica	233.252			39	Trop_dry_deciduous_(Bolivia)	34	Manihot.guaranitica	233.062	233.252			46	Lowland_trop_rainf_(Montagne_Tortue_FG)	213	Astrocaryum.sciophilum	56.85	9.24905	16.2692			99	Lowland_trop_rainf_(Montagne_Tortue_FG)	213	Astrocaryum.sciophilum	16.2457	16.2692
126	Evergreen_tropical_rainf_(Ecuador)	251	SIPADE	232.019			136	Evergreen_tropical_rainf_(Ecuador)	251	SIPADE	231.923	232.019			117	Trop_dry_deciduous_(Bolivia)	34	Astronium.urundeuva	145.757	45.0825	30.9298			28	Trop_dry_deciduous_(Bolivia)	34	Astronium.urundeuva	29.8849	30.9298
118	Riparian_chaparral_evergreen_(California)	54	Ribes_californicum_var._californicum	231.361			68	Riparian_chaparral_evergreen_(California)	54	Ribes_californicum_var._californicum	230.804	231.361			90	Riparian_chaparral_evergreen_(California)	54	Baccharis_pilularis	125.849	44.8235	35.6169			52	Riparian_chaparral_evergreen_(California)	54	Baccharis_pilularis	32.9626	35.6169
4	Evergreen_tropical_rainf_(Ecuador)	251	ACALCU	225.094			103	Evergreen_tropical_rainf_(Ecuador)	251	ACALCU	225.711	225.094			1	Boreal_(Finland)	1	BEPE	241.905	44.0422	18.2064			1	Boreal_(Finland)	1	BEPE	17.0395	18.2064
30	Trop_dry_deciduous_(Bolivia)	34	Casearia.gossypiosperma	221.016			133	Evergreen_tropical_rainf_(Ecuador)	251	RINOVI	221.014	221.016			4	Boreal_(Finland)	2	BEPE	239.066	45.6883	19.1111			4	Boreal_(Finland)	2	BEPE	17.2499	19.1111
120	Evergreen_tropical_rainf_(Ecuador)	251	RINOVI	220.605			32	Trop_dry_deciduous_(Bolivia)	34	Casearia.gossypiosperma	220.604	220.605			50	Lowland_trop_rainf_(Nouragues_FG)	197	Bocoa.prouacensis	119.623	17.5215	14.6472			91	Lowland_trop_rainf_(Nouragues_FG)	197	Bocoa.prouacensis	14.4261	14.6472
70	Evergreen_tropical_rainf_(Ecuador)	251	LOZAKL	216.951			121	Evergreen_tropical_rainf_(Ecuador)	251	LOZAKL	216.668	216.951			118	Trop_dry_deciduous_(Bolivia)	34	Bougainvillea.modesta	162.194	26.0596	16.067			29	Trop_dry_deciduous_(Bolivia)	34	Bougainvillea.modesta	15.5534	16.067
50	Trop_dry_deciduous_(Bolivia)	34	Gallesia.integrifolia	215.21			37	Trop_dry_deciduous_(Bolivia)	34	Gallesia.integrifolia	215.567	215.21			12	Evergreen_tropical_rainf_(Ecuador)	251	BROWGR	194.252	23.7383	12.2204			109	Evergreen_tropical_rainf_(Ecuador)	251	BROWGR	11.7147	12.2204
79	Evergreen_tropical_rainf_(Ecuador)	251	NEEAPO	213.012			127	Evergreen_tropical_rainf_(Ecuador)	251	NEEAPO	213.234	213.012			119	Trop_dry_deciduous_(Bolivia)	34	Caesalpinia.pluviosa	165.649	29.4727	17.7923			30	Trop_dry_deciduous_(Bolivia)	34	Caesalpinia.pluviosa	17.1089	17.7923
109	Lowland_trop_rainf_(Nouragues_FG)	197	Quararibea.duckei	206.433			98	Lowland_trop_rainf_(Nouragues_FG)	197	Quararibea.duckei	206.068	206.433			120	Trop_dry_deciduous_(Bolivia)	34	Capparis.prisca	103.953	17.1349	16.4834			31	Trop_dry_deciduous_(Bolivia)	34	Capparis.prisca	15.988	16.4834
53	Evergreen_tropical_rainf_(Ecuador)	251	GUARSI	204.284			70	Riparian_chaparral_evergreen_(California)	54	Salix_lucida_ssp._lasiandra	203.886	204.284			13	Evergreen_tropical_rainf_(Ecuador)	251	CAPPSO	135.828	15.6182	11.4985			110	Evergreen_tropical_rainf_(Ecuador)	251	CAPPSO	10.9835	11.4985
122	Riparian_chaparral_evergreen_(California)	54	Salix_lucida_ssp._lasiandra	204.025			36	Trop_dry_deciduous_(Bolivia)	34	Erythroxylum.daphnites	203.873	204.025			121	Trop_dry_deciduous_(Bolivia)	34	Casearia.gossypiosperma	221.016	27.8568	12.604			32	Trop_dry_deciduous_(Bolivia)	34	Casearia.gossypiosperma	12.3841	12.604
88	Evergreen_tropical_rainf_(Ecuador)	251	PEREXA	203.918			137	Evergreen_tropical_rainf_(Ecuador)	251	SOROST	203.555	203.918			91	Riparian_chaparral_evergreen_(California)	54	Ceanothus_cuneatus_var._cuneatus	43.9769	6.3748	14.4958			53	Riparian_chaparral_evergreen_(California)	54	Ceanothus_cuneatus_var._cuneatus	13.5534	14.4958
128	Evergreen_tropical_rainf_(Ecuador)	251	SOROST	203.917			129	Evergreen_tropical_rainf_(Ecuador)	251	PEREXA	203.548	203.917			122	Trop_dry_deciduous_(Bolivia)	34	Ceiba.samauma	179.198	58.3372	32.5546			33	Trop_dry_deciduous_(Bolivia)	34	Ceiba.samauma	31.9966	32.5546
40	Trop_dry_deciduous_(Bolivia)	34	Erythroxylum.daphnites	203.566			117	Evergreen_tropical_rainf_(Ecuador)	251	GUARSI	203.508	203.566			123	Trop_dry_deciduous_(Bolivia)	34	Centrolobium.microchaete	240.301	60.8499	25.3223			34	Trop_dry_deciduous_(Bolivia)	34	Centrolobium.microchaete	24.2742	25.3223
87	Evergreen_tropical_rainf_(Ecuador)	251	PENTSU	201.117			128	Evergreen_tropical_rainf_(Ecuador)	251	PENTSU	201.1	201.117			92	Riparian_chaparral_evergreen_(California)	54	Cercocarpus_betuloides_var._betuloides	70.5245	10.0093	14.1927			54	Riparian_chaparral_evergreen_(California)	54	Cercocarpus_betuloides_var._betuloides	13.8467	14.1927
138	Trop_dry_deciduous_(Bolivia)	34	Zanthoxylum.monogynum...................	200.145			49	Trop_dry_deciduous_(Bolivia)	34	Zanthoxylum.monogynum...................	199.97	200.145			14	Evergreen_tropical_rainf_(Ecuador)	251	COCCDE	155.669	18.5102	11.8907			111	Evergreen_tropical_rainf_(Ecuador)	251	COCCDE	11.1334	11.8907
127	Trop_dry_deciduous_(Bolivia)	34	Solanum.riparium	196.94			45	Trop_dry_deciduous_(Bolivia)	34	Solanum.riparium	197.449	196.94			124	Trop_dry_deciduous_(Bolivia)	34	Combretum.leprosum	153.45	24.2921	15.8306			35	Trop_dry_deciduous_(Bolivia)	34	Combretum.leprosum	15.7095	15.8306
57	Evergreen_tropical_rainf_(Ecuador)	251	INGAUM	196.211			118	Evergreen_tropical_rainf_(Ecuador)	251	INGAUM	196.346	196.211			93	Riparian_chaparral_evergreen_(California)	54	Dirca_occidentalis	234.25	62.6491	26.7446			55	Riparian_chaparral_evergreen_(California)	54	Dirca_occidentalis	24.6735	26.7446
129	Trop_dry_deciduous_(Bolivia)	34	Spondias.mombin	196.119			46	Trop_dry_deciduous_(Bolivia)	34	Spondias.mombin	196.028	196.119			58	Lowland_trop_rainf_(Paracaou_FG)	150	Eperua_falcata	133.782	18.7046	13.9815			76	Lowland_trop_rainf_(Paracaou_FG)	150	Eperua_falcata	13.0329	13.9815
26	Evergreen_tropical_rainf_(Ecuador)	251	BROWGR	194.252			109	Evergreen_tropical_rainf_(Ecuador)	251	BROWGR	194.695	194.252			59	Lowland_trop_rainf_(Paracaou_FG)	150	Eperua_grandiflora	96.2	19.5883	20.3621			77	Lowland_trop_rainf_(Paracaou_FG)	150	Eperua_grandiflora	19.8176	20.3621
51	Evergreen_tropical_rainf_(Ecuador)	251	GUAPCL	191.832			115	Evergreen_tropical_rainf_(Ecuador)	251	GUAPCL	191.805	191.832			125	Trop_dry_deciduous_(Bolivia)	34	Erythroxylum.daphnites	203.566	59.0406	29.0031			36	Trop_dry_deciduous_(Bolivia)	34	Erythroxylum.daphnites	28.9704	29.0031
10	Evergreen_tropical_rainf_(Ecuador)	251	ALLOGL	191.625			105	Evergreen_tropical_rainf_(Ecuador)	251	ALLOGL	191.715	191.625			15	Evergreen_tropical_rainf_(Ecuador)	251	ESCHCO	133.819	15.6621	11.704			112	Evergreen_tropical_rainf_(Ecuador)	251	ESCHCO	10.5238	11.704
73	Evergreen_tropical_rainf_(Ecuador)	251	MICOTI	188.661			123	Evergreen_tropical_rainf_(Ecuador)	251	MICOTI	188.883	188.661			51	Lowland_trop_rainf_(Nouragues_FG)	197	Eschweilera.coriacea	111.75	15.6697	14.0221			92	Lowland_trop_rainf_(Nouragues_FG)	197	Eschweilera.coriacea	13.6375	14.0221
124	Trop_dry_deciduous_(Bolivia)	34	Simira.rubescens	186.335			44	Trop_dry_deciduous_(Bolivia)	34	Simira.rubescens	185.633	186.335			47	Lowland_trop_rainf_(Montagne_Tortue_FG)	213	Eschweilera.coriacea	118.72	21.2733	17.9189			101	Lowland_trop_rainf_(Montagne_Tortue_FG)	213	Eschweilera.coriacea	15.597	17.9189
130	Trop_dry_deciduous_(Bolivia)	34	Sweetia.fruticosa	179.671			33	Trop_dry_deciduous_(Bolivia)	34	Ceiba.samauma	179.427	179.671			16	Evergreen_tropical_rainf_(Ecuador)	251	EUGEFL	171.207	20.9952	12.263			113	Evergreen_tropical_rainf_(Ecuador)	251	EUGEFL	11.6082	12.263
32	Trop_dry_deciduous_(Bolivia)	34	Ceiba.samauma	179.198			47	Trop_dry_deciduous_(Bolivia)	34	Sweetia.fruticosa	179.309	179.198			17	Evergreen_tropical_rainf_(Ecuador)	251	FARACA	163.939	26.304	16.045			114	Evergreen_tropical_rainf_(Ecuador)	251	FARACA	15.5165	16.045
78	Evergreen_tropical_rainf_(Ecuador)	251	NEEABA	176.236			126	Evergreen_tropical_rainf_(Ecuador)	251	NEEABA	176.375	176.236			79	Mount_beech_(Romania)	1	fasy	378.158	41.4637	10.9646			8	Mount_beech_(Romania)	1	fasy	10.293	10.9646
135	Trop_dry_deciduous_(Bolivia)	34	Trichilia.elegans	172.566			48	Trop_dry_deciduous_(Bolivia)	34	Trichilia.elegans	172.722	172.566			82	Mount_beech_(Romania)	2	fasy	395.616	44.0021	11.1224			10	Mount_beech_(Romania)	2	fasy	9.97568	11.1224
6	Trop_dry_deciduous_(Bolivia)	34	Acosmium.cardenasii	172.341			23	Trop_dry_deciduous_(Bolivia)	34	Acosmium.cardenasii	172.508	172.341			85	Mount_beech_(Romania)	3	fasy	394.093	51.108	12.9685			13	Mount_beech_(Romania)	3	fasy	12.2842	12.9685
44	Evergreen_tropical_rainf_(Ecuador)	251	EUGEFL	171.207			113	Evergreen_tropical_rainf_(Ecuador)	251	EUGEFL	171.115	171.207			87	Mount_beech_(Romania)	4	fasy	420.692	23.8453	5.66813			16	Mount_beech_(Romania)	4	fasy	5.46401	5.66813
27	Trop_dry_deciduous_(Bolivia)	34	Caesalpinia.pluviosa	165.649			30	Trop_dry_deciduous_(Bolivia)	34	Caesalpinia.pluviosa	165.357	165.649			126	Trop_dry_deciduous_(Bolivia)	34	Gallesia.integrifolia	215.21	65.4349	30.4052			37	Trop_dry_deciduous_(Bolivia)	34	Gallesia.integrifolia	29.4804	30.4052
11	Trop_dry_deciduous_(Bolivia)	34	Ampelocera.ruizii	165.191			58	Riparian_chaparral_evergreen_(California)	54	Lonicera_hispidula_var._vacillans	165.321	165.191			18	Evergreen_tropical_rainf_(Ecuador)	251	GUAPCL	191.832	37.3713	19.4812			115	Evergreen_tropical_rainf_(Ecuador)	251	GUAPCL	18.8745	19.4812
89	Trop_dry_deciduous_(Bolivia)	34	Phyllostylon.rhamnoides	164.561			25	Trop_dry_deciduous_(Bolivia)	34	Ampelocera.ruizii	165.165	164.561			19	Evergreen_tropical_rainf_(Ecuador)	251	GUARGR	155.791	22.1427	14.2131			116	Evergreen_tropical_rainf_(Ecuador)	251	GUARGR	13.8977	14.2131
69	Riparian_chaparral_evergreen_(California)	54	Lonicera_hispidula_var._vacillans	164.238			122	Evergreen_tropical_rainf_(Ecuador)	251	MICOEL	164.656	164.238			20	Evergreen_tropical_rainf_(Ecuador)	251	GUARSI	204.284	36.0718	17.6577			117	Evergreen_tropical_rainf_(Ecuador)	251	GUARSI	17.1515	17.6577
72	Evergreen_tropical_rainf_(Ecuador)	251	MICOEL	164.06			114	Evergreen_tropical_rainf_(Ecuador)	251	FARACA	164.2	164.06			52	Lowland_trop_rainf_(Nouragues_FG)	197	Gustavia.hexapetala	136.21	27.1019	19.8971			93	Lowland_trop_rainf_(Nouragues_FG)	197	Gustavia.hexapetala	18.0489	19.8971
45	Evergreen_tropical_rainf_(Ecuador)	251	FARACA	163.939			42	Trop_dry_deciduous_(Bolivia)	34	Phyllostylon.rhamnoides	164.132	163.939			60	Lowland_trop_rainf_(Paracaou_FG)	150	Gustavia_hexapetala	132.422	24.2391	18.3044			78	Lowland_trop_rainf_(Paracaou_FG)	150	Gustavia_hexapetala	18.0532	18.3044
25	Trop_dry_deciduous_(Bolivia)	34	Bougainvillea.modesta	162.194			29	Trop_dry_deciduous_(Bolivia)	34	Bougainvillea.modesta	162.276	162.194			94	Riparian_chaparral_evergreen_(California)	54	Heteromeles_arbutifolia	61.4097	15.7744	25.6872			56	Riparian_chaparral_evergreen_(California)	54	Heteromeles_arbutifolia	23.458	25.6872
67	Evergreen_tropical_rainf_(Ecuador)	251	LICANE	159.793			120	Evergreen_tropical_rainf_(Ecuador)	251	LICANE	160.182	159.793			21	Evergreen_tropical_rainf_(Ecuador)	251	INGAUM	196.211	25.1067	12.7958			118	Evergreen_tropical_rainf_(Ecuador)	251	INGAUM	12.4555	12.7958
52	Evergreen_tropical_rainf_(Ecuador)	251	GUARGR	155.791			116	Evergreen_tropical_rainf_(Ecuador)	251	GUARGR	155.687	155.791			22	Evergreen_tropical_rainf_(Ecuador)	251	IRYAHO	133.238	25.9475	19.4745			119	Evergreen_tropical_rainf_(Ecuador)	251	IRYAHO	18.537	19.4745
35	Evergreen_tropical_rainf_(Ecuador)	251	COCCDE	155.669			111	Evergreen_tropical_rainf_(Ecuador)	251	COCCDE	155.584	155.669			44	Lowland_trop_rainf_(BAFOG_FG)	156	Iryanthera.sagotiana	128.735	22.7401	17.6642			89	Lowland_trop_rainf_(BAFOG_FG)	156	Iryanthera.sagotiana	17.3027	17.6642
76	Trop_dry_deciduous_(Bolivia)	34	Myrciaria.cauliflora	153.877			27	Trop_dry_deciduous_(Bolivia)	34	Aspidosperma.tomentosum	154.072	153.877			61	Lowland_trop_rainf_(Paracaou_FG)	150	Iryanthera_hostmannii	106.058	15.7163	14.8186			79	Lowland_trop_rainf_(Paracaou_FG)	150	Iryanthera_hostmannii	14.4417	14.8186
17	Trop_dry_deciduous_(Bolivia)	34	Aspidosperma.tomentosum	153.581			40	Trop_dry_deciduous_(Bolivia)	34	Myrciaria.cauliflora	153.882	153.581			62	Lowland_trop_rainf_(Paracaou_FG)	150	Iryanthera_sagotiana	114.8	16.8908	14.7133			80	Lowland_trop_rainf_(Paracaou_FG)	150	Iryanthera_sagotiana	14.359	14.7133
36	Trop_dry_deciduous_(Bolivia)	34	Combretum.leprosum	153.45			85	Lowland_trop_rainf_(Paracaou_FG)	150	Sandwithia_guianensis	153.727	153.45			127	Trop_dry_deciduous_(Bolivia)	34	Jacaratia.sp.	521.917	67.4278	12.9193			38	Trop_dry_deciduous_(Bolivia)	34	Jacaratia.sp.	11.9872	12.9193
123	Lowland_trop_rainf_(Paracaou_FG)	150	Sandwithia_guianensis	153.378			35	Trop_dry_deciduous_(Bolivia)	34	Combretum.leprosum	153.675	153.378			53	Lowland_trop_rainf_(Nouragues_FG)	197	Jessenia.bataua	83.02	43.1611	51.9888			94	Lowland_trop_rainf_(Nouragues_FG)	197	Jessenia.bataua	45.3607	51.9888
75	Evergreen_tropical_rainf_(Ecuador)	251	MYRCBL	152.955			124	Evergreen_tropical_rainf_(Ecuador)	251	MYRCBL	152.696	152.955			54	Lowland_trop_rainf_(Nouragues_FG)	197	Lecythis.persistens	84.8455	14.8447	17.4961			95	Lowland_trop_rainf_(Nouragues_FG)	197	Lecythis.persistens	16.8366	17.4961
125	Evergreen_tropical_rainf_(Ecuador)	251	SIPABI	146.988			138	Evergreen_tropical_rainf_(Ecuador)	251	UNONVE	146.94	146.988			63	Lowland_trop_rainf_(Paracaou_FG)	150	Lecythis_persistens	67.8937	13.6394	20.0894			81	Lowland_trop_rainf_(Paracaou_FG)	150	Lecythis_persistens	19.0453	20.0894
137	Evergreen_tropical_rainf_(Ecuador)	251	UNONVE	146.609			74	Lowland_trop_rainf_(Acarouany_FG)	148	Protium.gallicum	146.766	146.609			95	Riparian_chaparral_evergreen_(California)	54	Lepechinia_calycina	124.843	26.6323	21.3327			57	Riparian_chaparral_evergreen_(California)	54	Lepechinia_calycina	20.1511	21.3327
102	Lowland_trop_rainf_(Acarouany_FG)	148	Protium.gallicum	145.873			135	Evergreen_tropical_rainf_(Ecuador)	251	SIPABI	146.088	145.873			23	Evergreen_tropical_rainf_(Ecuador)	251	LICANE	159.793	36.6509	22.9365			120	Evergreen_tropical_rainf_(Ecuador)	251	LICANE	22.1109	22.9365
20	Trop_dry_deciduous_(Bolivia)	34	Astronium.urundeuva	145.757			28	Trop_dry_deciduous_(Bolivia)	34	Astronium.urundeuva	144.738	145.757			55	Lowland_trop_rainf_(Nouragues_FG)	197	Licania.canescens	113.512	19.1004	16.8268			96	Lowland_trop_rainf_(Nouragues_FG)	197	Licania.canescens	15.8905	16.8268
105	Evergreen_tropical_rainf_(Ecuador)	251	PROTNO	144.479			132	Evergreen_tropical_rainf_(Ecuador)	251	PROTNO	144.69	144.479			96	Riparian_chaparral_evergreen_(California)	54	Lonicera_hispidula_var._vacillans	164.238	63.3049	38.5447			58	Riparian_chaparral_evergreen_(California)	54	Lonicera_hispidula_var._vacillans	32.5394	38.5447
115	Riparian_chaparral_evergreen_(California)	54	Rhamnus_californica_ssp._californica	140.906			66	Riparian_chaparral_evergreen_(California)	54	Rhamnus_californica_ssp._californica	140.998	140.906			24	Evergreen_tropical_rainf_(Ecuador)	251	LOZAKL	216.951	25.0272	11.5359			121	Evergreen_tropical_rainf_(Ecuador)	251	LOZAKL	11.365	11.5359
12	Evergreen_tropical_rainf_(Ecuador)	251	ANIBRI	140.42			106	Evergreen_tropical_rainf_(Ecuador)	251	ANIBRI	140.525	140.42			128	Trop_dry_deciduous_(Bolivia)	34	Manihot.guaranitica	233.252	29.9178	12.8264			39	Trop_dry_deciduous_(Bolivia)	34	Manihot.guaranitica	12.3253	12.8264
77	Evergreen_tropical_rainf_(Ecuador)	251	NECTVI	138.309			125	Evergreen_tropical_rainf_(Ecuador)	251	NECTVI	138.313	138.309			25	Evergreen_tropical_rainf_(Ecuador)	251	MICOEL	164.06	32.8674	20.0338			122	Evergreen_tropical_rainf_(Ecuador)	251	MICOEL	19.2295	20.0338
103	Lowland_trop_rainf_(BAFOG_FG)	156	Protium.gallicum	136.92			26	Trop_dry_deciduous_(Bolivia)	34	Aspidosperma.cylindrocarpon	136.925	136.92			26	Evergreen_tropical_rainf_(Ecuador)	251	MICOTI	188.661	25.2378	13.3774			123	Evergreen_tropical_rainf_(Ecuador)	251	MICOTI	12.5536	13.3774
16	Trop_dry_deciduous_(Bolivia)	34	Aspidosperma.cylindrocarpon	136.27			88	Lowland_trop_rainf_(BAFOG_FG)	156	Protium.gallicum	136.727	136.27			97	Riparian_chaparral_evergreen_(California)	54	Mimulus_aurantiacus	74.2345	32.6862	44.0311			59	Riparian_chaparral_evergreen_(California)	54	Mimulus_aurantiacus	41.8004	44.0311
54	Lowland_trop_rainf_(Nouragues_FG)	197	Gustavia.hexapetala	136.21			93	Lowland_trop_rainf_(Nouragues_FG)	197	Gustavia.hexapetala	136.372	136.21			27	Evergreen_tropical_rainf_(Ecuador)	251	MYRCBL	152.955	25.3411	16.5677			124	Evergreen_tropical_rainf_(Ecuador)	251	MYRCBL	15.4939	16.5677
29	Evergreen_tropical_rainf_(Ecuador)	251	CAPPSO	135.828			110	Evergreen_tropical_rainf_(Ecuador)	251	CAPPSO	136.252	135.828			129	Trop_dry_deciduous_(Bolivia)	34	Myrciaria.cauliflora	153.877	27.748	18.0325			40	Trop_dry_deciduous_(Bolivia)	34	Myrciaria.cauliflora	17.0957	18.0325
41	Evergreen_tropical_rainf_(Ecuador)	251	ESCHCO	133.819			76	Lowland_trop_rainf_(Paracaou_FG)	150	Eperua_falcata	134.178	133.819			28	Evergreen_tropical_rainf_(Ecuador)	251	NECTVI	138.309	17.5887	12.7169			125	Evergreen_tropical_rainf_(Ecuador)	251	NECTVI	12.1479	12.7169
38	Lowland_trop_rainf_(Paracaou_FG)	150	Eperua_falcata	133.782			112	Evergreen_tropical_rainf_(Ecuador)	251	ESCHCO	133.493	133.782			29	Evergreen_tropical_rainf_(Ecuador)	251	NEEABA	176.236	31.4056	17.8202			126	Evergreen_tropical_rainf_(Ecuador)	251	NEEABA	17.0592	17.8202
58	Evergreen_tropical_rainf_(Ecuador)	251	IRYAHO	133.238			119	Evergreen_tropical_rainf_(Ecuador)	251	IRYAHO	133.041	133.238			30	Evergreen_tropical_rainf_(Ecuador)	251	NEEAPO	213.012	33.1425	15.559			127	Evergreen_tropical_rainf_(Ecuador)	251	NEEAPO	15.0733	15.559
55	Lowland_trop_rainf_(Paracaou_FG)	150	Gustavia_hexapetala	132.422			78	Lowland_trop_rainf_(Paracaou_FG)	150	Gustavia_hexapetala	132.427	132.422			130	Trop_dry_deciduous_(Bolivia)	34	Ouratea.sp.	95.5005	10.6847	11.1881			41	Trop_dry_deciduous_(Bolivia)	34	Ouratea.sp.	10.8703	11.1881
96	Lowland_trop_rainf_(Paracaou_FG)	150	Pogonophora_schomburgkiana	131.358			83	Lowland_trop_rainf_(Paracaou_FG)	150	Pogonophora_schomburgkiana	131.027	131.358			70	Lowland_trop_rainf_(Saut_Lavilette_FG)	224	Oxandra.asbeckii	117.939	17.075	14.4778			102	Lowland_trop_rainf_(Saut_Lavilette_FG)	224	Oxandra.asbeckii	13.749	14.4778
59	Lowland_trop_rainf_(BAFOG_FG)	156	Iryanthera.sagotiana	128.735			87	Lowland_trop_rainf_(Paracaou_FG)	150	Tovomita_sp._B1	128.772	128.735			64	Lowland_trop_rainf_(Paracaou_FG)	150	Oxandra_asbeckii	108.572	11.3801	10.4816			82	Lowland_trop_rainf_(Paracaou_FG)	150	Oxandra_asbeckii	9.86905	10.4816
134	Lowland_trop_rainf_(Paracaou_FG)	150	Tovomita_sp._B1	128.577			89	Lowland_trop_rainf_(BAFOG_FG)	156	Iryanthera.sagotiana	128.587	128.577			71	Medit_mixed_(Spain)	1	P.nigra	40.6138	5.83957	14.3783			17	Medit_mixed_(Spain)	1	P.nigra	13.6296	14.3783
21	Riparian_chaparral_evergreen_(California)	54	Baccharis_pilularis	125.849			52	Riparian_chaparral_evergreen_(California)	54	Baccharis_pilularis	124.743	125.849			72	Medit_mixed_(Spain)	2	P.nigra	40.2024	5.35562	13.3217			18	Medit_mixed_(Spain)	2	P.nigra	12.1894	13.3217
66	Riparian_chaparral_evergreen_(California)	54	Lepechinia_calycina	124.843			57	Riparian_chaparral_evergreen_(California)	54	Lepechinia_calycina	124.498	124.843			76	Medit_mixed_(Spain)	3	P.nigra	41.7637	4.78949	11.4681			22	Medit_mixed_(Spain)	3	P.nigra	10.978	11.4681
101	Evergreen_tropical_rainf_(Ecuador)	251	PRESSC	122.145			131	Evergreen_tropical_rainf_(Ecuador)	251	PRESSC	121.958	122.145			73	Medit_mixed_(Spain)	2	P.sylvestris	41.2781	6.71168	16.2597			19	Medit_mixed_(Spain)	2	P.sylvestris	15.5409	16.2597
24	Lowland_trop_rainf_(Nouragues_FG)	197	Bocoa.prouacensis	119.623			91	Lowland_trop_rainf_(Nouragues_FG)	197	Bocoa.prouacensis	119.36	119.623			31	Evergreen_tropical_rainf_(Ecuador)	251	PENTSU	201.117	49.2514	24.4889			128	Evergreen_tropical_rainf_(Ecuador)	251	PENTSU	24.2322	24.4889
43	Lowland_trop_rainf_(Montagne_Tortue_FG)	213	Eschweilera.coriacea	118.72			101	Lowland_trop_rainf_(Montagne_Tortue_FG)	213	Eschweilera.coriacea	118.871	118.72			32	Evergreen_tropical_rainf_(Ecuador)	251	PEREXA	203.918	38.0678	18.6682			129	Evergreen_tropical_rainf_(Ecuador)	251	PEREXA	18.0778	18.6682
81	Lowland_trop_rainf_(Saut_Lavilette_FG)	224	Oxandra.asbeckii	117.939			102	Lowland_trop_rainf_(Saut_Lavilette_FG)	224	Oxandra.asbeckii	117.871	117.939			131	Trop_dry_deciduous_(Bolivia)	34	Phyllostylon.rhamnoides	164.561	29.3469	17.8334			42	Trop_dry_deciduous_(Bolivia)	34	Phyllostylon.rhamnoides	17.5048	17.8334
100	Evergreen_tropical_rainf_(Ecuador)	251	POUTVE	116.662			130	Evergreen_tropical_rainf_(Ecuador)	251	POUTVE	116.589	116.662			2	Boreal_(Finland)	1	PIAB	65.8026	20.7123	31.4764			3	Boreal_(Finland)	1	PIAB	25.6389	31.4764
104	Lowland_trop_rainf_(Montagne_Tortue_FG)	213	Protium.opacum	115.545			100	Lowland_trop_rainf_(Montagne_Tortue_FG)	213	Protium.opacum	115.325	115.545			80	Mount_beech_(Romania)	1	piab	104.783	9.07235	8.65819			9	Mount_beech_(Romania)	1	piab	8.14756	8.65819
61	Lowland_trop_rainf_(Paracaou_FG)	150	Iryanthera_sagotiana	114.8			80	Lowland_trop_rainf_(Paracaou_FG)	150	Iryanthera_sagotiana	114.781	114.8			5	Boreal_(Finland)	2	PIAB	69.6234	15.8495	22.7646			5	Boreal_(Finland)	2	PIAB	19.482	22.7646
68	Lowland_trop_rainf_(Nouragues_FG)	197	Licania.canescens	113.512			96	Lowland_trop_rainf_(Nouragues_FG)	197	Licania.canescens	113.759	113.512			83	Mount_beech_(Romania)	2	piab	104.246	22.1737	21.2705			12	Mount_beech_(Romania)	2	piab	18.8615	21.2705
114	Riparian_chaparral_evergreen_(California)	54	Quercus_lobata	112.68			65	Riparian_chaparral_evergreen_(California)	54	Quercus_lobata	112.658	112.68			86	Mount_beech_(Romania)	3	piab	98.8044	13.6557	13.821			15	Mount_beech_(Romania)	3	piab	13.3714	13.821
107	Medit_mixed_(Spain)	2	Q.faginea	111.938			64	Riparian_chaparral_evergreen_(California)	54	Quercus_kelloggii	111.935	111.938			3	Boreal_(Finland)	1	PISY	77.6772	14.0241	18.0543			2	Boreal_(Finland)	1	PISY	16.8723	18.0543
113	Riparian_chaparral_evergreen_(California)	54	Quercus_kelloggii	111.896			20	Medit_mixed_(Spain)	2	Q.faginea	111.917	111.896			65	Lowland_trop_rainf_(Paracaou_FG)	150	Pogonophora_schomburgkiana	131.358	25.1877	19.1748			83	Lowland_trop_rainf_(Paracaou_FG)	150	Pogonophora_schomburgkiana	16.907	19.1748
42	Lowland_trop_rainf_(Nouragues_FG)	197	Eschweilera.coriacea	111.75			92	Lowland_trop_rainf_(Nouragues_FG)	197	Eschweilera.coriacea	111.744	111.75			132	Trop_dry_deciduous_(Bolivia)	34	Pogonopus.tubulosus	255.948	27.2354	10.641			43	Trop_dry_deciduous_(Bolivia)	34	Pogonopus.tubulosus	10.4649	10.641
15	Riparian_chaparral_evergreen_(California)	54	Artemisia_californica	109.431			51	Riparian_chaparral_evergreen_(California)	54	Artemisia_californica	109.375	109.431			42	Lowland_trop_rainf_(Acarouany_FG)	148	Poraqueiba.guianensis	102.206	10.8495	10.6153			75	Lowland_trop_rainf_(Acarouany_FG)	148	Poraqueiba.guianensis	10.109	10.6153
136	Riparian_chaparral_evergreen_(California)	54	Umbellularia_californica	109.082			73	Riparian_chaparral_evergreen_(California)	54	Umbellularia_californica	108.708	109.082			56	Lowland_trop_rainf_(Nouragues_FG)	197	Pouteria.gonggrijpii	91.5727	18.2023	19.8774			97	Lowland_trop_rainf_(Nouragues_FG)	197	Pouteria.gonggrijpii	19.4693	19.8774
82	Lowland_trop_rainf_(Paracaou_FG)	150	Oxandra_asbeckii	108.572			82	Lowland_trop_rainf_(Paracaou_FG)	150	Oxandra_asbeckii	108.258	108.572			33	Evergreen_tropical_rainf_(Ecuador)	251	POUTVE	116.662	14.8085	12.6935			130	Evergreen_tropical_rainf_(Ecuador)	251	POUTVE	12.3509	12.6935
60	Lowland_trop_rainf_(Paracaou_FG)	150	Iryanthera_hostmannii	106.058			79	Lowland_trop_rainf_(Paracaou_FG)	150	Iryanthera_hostmannii	106.09	106.058			34	Evergreen_tropical_rainf_(Ecuador)	251	PRESSC	122.145	22.5871	18.492			131	Evergreen_tropical_rainf_(Ecuador)	251	PRESSC	18.4253	18.492
90	Mount_beech_(Romania)	1	piab	104.783			9	Mount_beech_(Romania)	1	piab	104.728	104.783			43	Lowland_trop_rainf_(Acarouany_FG)	148	Protium.gallicum	145.873	24.8559	17.0395			74	Lowland_trop_rainf_(Acarouany_FG)	148	Protium.gallicum	15.9331	17.0395
91	Mount_beech_(Romania)	2	piab	104.246			12	Mount_beech_(Romania)	2	piab	104.614	104.246			45	Lowland_trop_rainf_(BAFOG_FG)	156	Protium.gallicum	136.92	17.344	12.6673			88	Lowland_trop_rainf_(BAFOG_FG)	156	Protium.gallicum	12.1007	12.6673
28	Trop_dry_deciduous_(Bolivia)	34	Capparis.prisca	103.953			31	Trop_dry_deciduous_(Bolivia)	34	Capparis.prisca	103.925	103.953			48	Lowland_trop_rainf_(Montagne_Tortue_FG)	213	Protium.opacum	115.545	22.4684	19.4455			100	Lowland_trop_rainf_(Montagne_Tortue_FG)	213	Protium.opacum	19.3049	19.4455
98	Lowland_trop_rainf_(Acarouany_FG)	148	Poraqueiba.guianensis	102.206			75	Lowland_trop_rainf_(Acarouany_FG)	148	Poraqueiba.guianensis	102.401	102.206			35	Evergreen_tropical_rainf_(Ecuador)	251	PROTNO	144.479	15.6392	10.8245			132	Evergreen_tropical_rainf_(Ecuador)	251	PROTNO	10.53	10.8245
121	Evergreen_tropical_rainf_(Ecuador)	251	SALAAT	101.614			134	Evergreen_tropical_rainf_(Ecuador)	251	SALAAT	101.487	101.614			98	Riparian_chaparral_evergreen_(California)	54	Prunus_ilicifolia_ssp._ilicifolia	70.4343	13.583	19.2847			60	Riparian_chaparral_evergreen_(California)	54	Prunus_ilicifolia_ssp._ilicifolia	18.4056	19.2847
92	Mount_beech_(Romania)	3	piab	98.8044			15	Mount_beech_(Romania)	3	piab	98.7435	98.8044			74	Medit_mixed_(Spain)	2	Q.faginea	111.938	14.1183	12.6126			20	Medit_mixed_(Spain)	2	Q.faginea	12.1506	12.6126
116	Riparian_chaparral_evergreen_(California)	54	Rhamnus_crocea	96.9682			67	Riparian_chaparral_evergreen_(California)	54	Rhamnus_crocea	96.35	96.9682			75	Medit_mixed_(Spain)	2	Q.ilex	51.5164	7.52665	14.6102			21	Medit_mixed_(Spain)	2	Q.ilex	14.0198	14.6102
39	Lowland_trop_rainf_(Paracaou_FG)	150	Eperua_grandiflora	96.2			77	Lowland_trop_rainf_(Paracaou_FG)	150	Eperua_grandiflora	96.2038	96.2			57	Lowland_trop_rainf_(Nouragues_FG)	197	Quararibea.duckei	206.433	55.2324	26.7556			98	Lowland_trop_rainf_(Nouragues_FG)	197	Quararibea.duckei	21.7237	26.7556
1	Mount_beech_(Romania)	1	abal	95.5551			41	Trop_dry_deciduous_(Bolivia)	34	Ouratea.sp.	95.6317	95.5551			99	Riparian_chaparral_evergreen_(California)	54	Quercus_agrifolia__var._agrifolia	63.675	20.4823	32.1669			61	Riparian_chaparral_evergreen_(California)	54	Quercus_agrifolia__var._agrifolia	27.7856	32.1669
80	Trop_dry_deciduous_(Bolivia)	34	Ouratea.sp.	95.5005			6	Mount_beech_(Romania)	1	abal	95.4289	95.5005			100	Riparian_chaparral_evergreen_(California)	54	Quercus_douglasii	76.086	14.2384	18.7136			62	Riparian_chaparral_evergreen_(California)	54	Quercus_douglasii	18.0549	18.7136
99	Lowland_trop_rainf_(Nouragues_FG)	197	Pouteria.gonggrijpii	91.5727			97	Lowland_trop_rainf_(Nouragues_FG)	197	Pouteria.gonggrijpii	91.4927	91.5727			101	Riparian_chaparral_evergreen_(California)	54	Quercus_durata_var._durata	72.7144	21.5712	29.6657			63	Riparian_chaparral_evergreen_(California)	54	Quercus_durata_var._durata	25.5559	29.6657
3	Mount_beech_(Romania)	3	abal	90.0861			14	Mount_beech_(Romania)	3	abal	90.1765	90.0861			102	Riparian_chaparral_evergreen_(California)	54	Quercus_kelloggii	111.896	31.6894	28.3203			64	Riparian_chaparral_evergreen_(California)	54	Quercus_kelloggii	27.7879	28.3203
2	Mount_beech_(Romania)	2	abal	86.7611			11	Mount_beech_(Romania)	2	abal	86.722	86.7611			103	Riparian_chaparral_evergreen_(California)	54	Quercus_lobata	112.68	31.7939	28.2162			65	Riparian_chaparral_evergreen_(California)	54	Quercus_lobata	25.7707	28.2162
64	Lowland_trop_rainf_(Nouragues_FG)	197	Lecythis.persistens	84.8455			95	Lowland_trop_rainf_(Nouragues_FG)	197	Lecythis.persistens	85.0541	84.8455			104	Riparian_chaparral_evergreen_(California)	54	Rhamnus_californica_ssp._californica	140.906	37.4896	26.6061			66	Riparian_chaparral_evergreen_(California)	54	Rhamnus_californica_ssp._californica	26.1098	26.6061
63	Lowland_trop_rainf_(Nouragues_FG)	197	Jessenia.bataua	83.02			94	Lowland_trop_rainf_(Nouragues_FG)	197	Jessenia.bataua	82.9407	83.02			105	Riparian_chaparral_evergreen_(California)	54	Rhamnus_crocea	96.9682	29.2682	30.1833			67	Riparian_chaparral_evergreen_(California)	54	Rhamnus_crocea	26.6848	30.1833
95	Boreal_(Finland)	1	PISY	77.6772			2	Boreal_(Finland)	1	PISY	77.6533	77.6772			66	Lowland_trop_rainf_(Paracaou_FG)	150	Rheedia_madruno	76.29	10.732	14.0674			84	Lowland_trop_rainf_(Paracaou_FG)	150	Rheedia_madruno	13.6754	14.0674
117	Lowland_trop_rainf_(Paracaou_FG)	150	Rheedia_madruno	76.29			84	Lowland_trop_rainf_(Paracaou_FG)	150	Rheedia_madruno	76.2569	76.29			106	Riparian_chaparral_evergreen_(California)	54	Ribes_californicum_var._californicum	231.361	94.206	40.7182			68	Riparian_chaparral_evergreen_(California)	54	Ribes_californicum_var._californicum	37.0009	40.7182
111	Riparian_chaparral_evergreen_(California)	54	Quercus_douglasii	76.086			62	Riparian_chaparral_evergreen_(California)	54	Quercus_douglasii	75.7038	76.086			107	Riparian_chaparral_evergreen_(California)	54	Ribes_sanguineum_var._glutinosum	342.646	181.492	52.9678			69	Riparian_chaparral_evergreen_(California)	54	Ribes_sanguineum_var._glutinosum	51.0932	52.9678
74	Riparian_chaparral_evergreen_(California)	54	Mimulus_aurantiacus	74.2345			59	Riparian_chaparral_evergreen_(California)	54	Mimulus_aurantiacus	73.8797	74.2345			36	Evergreen_tropical_rainf_(Ecuador)	251	RINOVI	220.605	39.5575	17.9314			133	Evergreen_tropical_rainf_(Ecuador)	251	RINOVI	17.283	17.9314
112	Riparian_chaparral_evergreen_(California)	54	Quercus_durata_var._durata	72.7144			63	Riparian_chaparral_evergreen_(California)	54	Quercus_durata_var._durata	72.862	72.7144			37	Evergreen_tropical_rainf_(Ecuador)	251	SALAAT	101.614	10.3972	10.2321			134	Evergreen_tropical_rainf_(Ecuador)	251	SALAAT	9.74867	10.2321
34	Riparian_chaparral_evergreen_(California)	54	Cercocarpus_betuloides_var._betuloides	70.5245			54	Riparian_chaparral_evergreen_(California)	54	Cercocarpus_betuloides_var._betuloides	70.5711	70.5245			108	Riparian_chaparral_evergreen_(California)	54	Salix_lucida_ssp._lasiandra	204.025	69.5206	34.0746			70	Riparian_chaparral_evergreen_(California)	54	Salix_lucida_ssp._lasiandra	33.0223	34.0746
106	Riparian_chaparral_evergreen_(California)	54	Prunus_ilicifolia_ssp._ilicifolia	70.4343			60	Riparian_chaparral_evergreen_(California)	54	Prunus_ilicifolia_ssp._ilicifolia	70.3682	70.4343			67	Lowland_trop_rainf_(Paracaou_FG)	150	Sandwithia_guianensis	153.378	22.3648	14.5814			85	Lowland_trop_rainf_(Paracaou_FG)	150	Sandwithia_guianensis	13.8146	14.5814
94	Boreal_(Finland)	2	PIAB	69.6234			5	Boreal_(Finland)	2	PIAB	69.4435	69.6234			133	Trop_dry_deciduous_(Bolivia)	34	Simira.rubescens	186.335	45.8511	24.6068			44	Trop_dry_deciduous_(Bolivia)	34	Simira.rubescens	21.3597	24.6068
65	Lowland_trop_rainf_(Paracaou_FG)	150	Lecythis_persistens	67.8937			81	Lowland_trop_rainf_(Paracaou_FG)	150	Lecythis_persistens	67.7678	67.8937			38	Evergreen_tropical_rainf_(Ecuador)	251	SIPABI	146.988	43.8545	29.8354			135	Evergreen_tropical_rainf_(Ecuador)	251	SIPABI	27.5983	29.8354
93	Boreal_(Finland)	1	PIAB	65.8026			3	Boreal_(Finland)	1	PIAB	65.3979	65.8026			39	Evergreen_tropical_rainf_(Ecuador)	251	SIPADE	232.019	21.6467	9.32972			136	Evergreen_tropical_rainf_(Ecuador)	251	SIPADE	9.05085	9.32972
133	Lowland_trop_rainf_(Paracaou_FG)	150	Tapura_capitulifera	64.1143			86	Lowland_trop_rainf_(Paracaou_FG)	150	Tapura_capitulifera	64.3645	64.1143			134	Trop_dry_deciduous_(Bolivia)	34	Solanum.riparium	196.94	50.7667	25.7777			45	Trop_dry_deciduous_(Bolivia)	34	Solanum.riparium	25.2712	25.7777
110	Riparian_chaparral_evergreen_(California)	54	Quercus_agrifolia__var._agrifolia	63.675			90	Lowland_trop_rainf_(Nouragues_FG)	197	Astrocaryum.sciophilum	63.6958	63.675			40	Evergreen_tropical_rainf_(Ecuador)	251	SOROST	203.917	35.5836	17.45			137	Evergreen_tropical_rainf_(Ecuador)	251	SOROST	16.6059	17.45
18	Lowland_trop_rainf_(Nouragues_FG)	197	Astrocaryum.sciophilum	63.5762			61	Riparian_chaparral_evergreen_(California)	54	Quercus_agrifolia__var._agrifolia	63.5152	63.5762			135	Trop_dry_deciduous_(Bolivia)	34	Spondias.mombin	196.119	28.6457	14.6063			46	Trop_dry_deciduous_(Bolivia)	34	Spondias.mombin	14.3609	14.6063
56	Riparian_chaparral_evergreen_(California)	54	Heteromeles_arbutifolia	61.4097			56	Riparian_chaparral_evergreen_(California)	54	Heteromeles_arbutifolia	61.38	61.4097			136	Trop_dry_deciduous_(Bolivia)	34	Sweetia.fruticosa	179.671	45.2545	25.1875			47	Trop_dry_deciduous_(Bolivia)	34	Sweetia.fruticosa	21.8763	25.1875
9	Riparian_chaparral_evergreen_(California)	54	Adenostoma_fasciculatum	57.6841			50	Riparian_chaparral_evergreen_(California)	54	Adenostoma_fasciculatum	57.6612	57.6841			109	Riparian_chaparral_evergreen_(California)	54	Symphoricarpos_albus_var._laevigatus	363.439	173.394	47.7091			71	Riparian_chaparral_evergreen_(California)	54	Symphoricarpos_albus_var._laevigatus	45.0846	47.7091
19	Lowland_trop_rainf_(Montagne_Tortue_FG)	213	Astrocaryum.sciophilum	56.85			99	Lowland_trop_rainf_(Montagne_Tortue_FG)	213	Astrocaryum.sciophilum	56.9096	56.85			110	Riparian_chaparral_evergreen_(California)	54	Symphoricarpos_mollis	363.184	155.827	42.9058			72	Riparian_chaparral_evergreen_(California)	54	Symphoricarpos_mollis	32.2109	42.9058
108	Medit_mixed_(Spain)	2	Q.ilex	51.5164			21	Medit_mixed_(Spain)	2	Q.ilex	51.4371	51.5164			68	Lowland_trop_rainf_(Paracaou_FG)	150	Tapura_capitulifera	64.1143	11.2609	17.5638			86	Lowland_trop_rainf_(Paracaou_FG)	150	Tapura_capitulifera	16.9896	17.5638
31	Riparian_chaparral_evergreen_(California)	54	Ceanothus_cuneatus_var._cuneatus	43.9769			53	Riparian_chaparral_evergreen_(California)	54	Ceanothus_cuneatus_var._cuneatus	44.0659	43.9769			69	Lowland_trop_rainf_(Paracaou_FG)	150	Tovomita_sp._B1	128.577	23.822	18.5274			87	Lowland_trop_rainf_(Paracaou_FG)	150	Tovomita_sp._B1	17.0953	18.5274
85	Medit_mixed_(Spain)	3	P.nigra	41.7637			22	Medit_mixed_(Spain)	3	P.nigra	41.7053	41.7637			137	Trop_dry_deciduous_(Bolivia)	34	Trichilia.elegans	172.566	28.1096	16.2892			48	Trop_dry_deciduous_(Bolivia)	34	Trichilia.elegans	16.0243	16.2892
86	Medit_mixed_(Spain)	2	P.sylvestris	41.2781			19	Medit_mixed_(Spain)	2	P.sylvestris	41.3537	41.2781			111	Riparian_chaparral_evergreen_(California)	54	Umbellularia_californica	109.082	15.5217	14.2294			73	Riparian_chaparral_evergreen_(California)	54	Umbellularia_californica	13.4219	14.2294
83	Medit_mixed_(Spain)	1	P.nigra	40.6138			17	Medit_mixed_(Spain)	1	P.nigra	40.5993	40.6138			41	Evergreen_tropical_rainf_(Ecuador)	251	UNONVE	146.609	17.968	12.2558			138	Evergreen_tropical_rainf_(Ecuador)	251	UNONVE	11.9879	12.2558
84	Medit_mixed_(Spain)	2	P.nigra	40.2024			18	Medit_mixed_(Spain)	2	P.nigra	40.0695	40.2024			138	Trop_dry_deciduous_(Bolivia)	34	Zanthoxylum.monogynum...................	200.145	43.0089	21.4888			49	Trop_dry_deciduous_(Bolivia)	34	Zanthoxylum.monogynum...................	21.274	21.4888

## Sheet: >20
site	richness	sps	LA	SLA
Boreal_(Finland)	1	BEPE	12.9762	198.984
Boreal_(Finland)	1	BEPE	33.503	240.243
Boreal_(Finland)	1	BEPE	17.3703	216.579
Boreal_(Finland)	1	BEPE	26.5335	244.01
Boreal_(Finland)	1	PISY	0.7956	68.8424
Boreal_(Finland)	1	BEPE	17.3711	275.742
Boreal_(Finland)	1	PIAB	0.127697	70.9426
Boreal_(Finland)	1	BEPE	37.9083	239.18
Boreal_(Finland)	1	PISY	0.382423	61.2709
Boreal_(Finland)	1	BEPE	26.9258	322.799
Boreal_(Finland)	1	PISY	0.370233	37.0233
Boreal_(Finland)	1	BEPE	11.9817	155.603
Boreal_(Finland)	1	PIAB	0.09299	51.6611
Boreal_(Finland)	1	BEPE	14.7477	204.275
Boreal_(Finland)	1	BEPE	18.7483	232.786
Boreal_(Finland)	1	BEPE	31.2563	268.804
Boreal_(Finland)	1	BEPE	20.5622	232.073
Boreal_(Finland)	1	PIAB	0.13208	82.55
Boreal_(Finland)	1	BEPE	19.101	268.708
Boreal_(Finland)	1	PIAB	0.110973	55.4863
Boreal_(Finland)	1	BEPE	12.9625	250.211
Boreal_(Finland)	1	BEPE	9.34953	201.808
Boreal_(Finland)	1	PIAB	0.134287	47.9595
Boreal_(Finland)	1	BEPE	11.2682	238.485
Boreal_(Finland)	1	BEPE	10.9017	217.746
Boreal_(Finland)	1	PIAB	0.132417	47.2917
Boreal_(Finland)	1	PISY	0.774493	77.3692
Boreal_(Finland)	1	PIAB	0.124993	56.8152
Boreal_(Finland)	1	PISY	0.4485	72.1077
Boreal_(Finland)	1	BEPE	10.9222	190.502
Boreal_(Finland)	1	PIAB	0.11315	70.7188
Boreal_(Finland)	1	BEPE	24.5302	288.141
Boreal_(Finland)	1	PIAB	0.116907	53.1394
Boreal_(Finland)	1	BEPE	25.5067	231.569
Boreal_(Finland)	1	PIAB	0.104174	57.8744
Boreal_(Finland)	1	PISY	0.489106	68.988
Boreal_(Finland)	1	BEPE	19.6094	251.387
Boreal_(Finland)	1	BEPE	11.1378	282.834
Boreal_(Finland)	1	BEPE	12.017	174.638
Boreal_(Finland)	1	BEPE	16.4888	239.176
Boreal_(Finland)	1	BEPE	10.8933	211.544
Boreal_(Finland)	1	BEPE	10.1526	205.184
Boreal_(Finland)	1	BEPE	15.6897	240.152
Boreal_(Finland)	1	BEPE	13.4871	209.092
Boreal_(Finland)	1	PIAB	0.110783	92.3194
Boreal_(Finland)	1	PIAB	0.136583	85.3646
Boreal_(Finland)	1	PISY	0.370263	81.7164
Boreal_(Finland)	1	PISY	0.567683	68.9845
Boreal_(Finland)	1	BEPE	12.5284	219.701
Boreal_(Finland)	1	PIAB	0.150303	46.9698
Boreal_(Finland)	1	BEPE	11.873	294.587
Boreal_(Finland)	1	BEPE	14.641	319.405
Boreal_(Finland)	1	PIAB	0.0713267	59.4389
Boreal_(Finland)	1	BEPE	17.3274	300.086
Boreal_(Finland)	1	PIAB	0.103343	51.6717
Boreal_(Finland)	1	PIAB	0.0982	61.375
Boreal_(Finland)	1	PISY	0.38453	70.1475
Boreal_(Finland)	1	PIAB	0.100757	65.8794
Boreal_(Finland)	1	BEPE	8.6192	243.425
Boreal_(Finland)	1	BEPE	12.751	187.093
Boreal_(Finland)	1	BEPE	11.9958	187.978
Boreal_(Finland)	1	BEPE	12.3756	178.75
Boreal_(Finland)	1	BEPE	15.1566	236.435
Boreal_(Finland)	1	PIAB	0.121863	60.9317
Boreal_(Finland)	1	BEPE	12.3887	213.586
Boreal_(Finland)	1	PIAB	0.0999133	83.2611
Boreal_(Finland)	1	PIAB	0.143387	71.6933
Boreal_(Finland)	1	PIAB	0.101263	50.6317
Boreal_(Finland)	1	PIAB	0.103407	64.6292
Boreal_(Finland)	1	PISY	0.580067	79.4555
Boreal_(Finland)	1	PIAB	0.139737	58.2236
Boreal_(Finland)	1	BEPE	12.9265	212.493
Boreal_(Finland)	1	BEPE	10.109	341.11
Boreal_(Finland)	1	PIAB	0.146657	91.6604
Boreal_(Finland)	1	BEPE	11.0303	284.533
Boreal_(Finland)	1	PIAB	0.12283	46.0613
Boreal_(Finland)	1	PISY	0.6163	87.1304
Boreal_(Finland)	1	PIAB	0.136673	52.5667
Boreal_(Finland)	1	BEPE	13.686	242.25
Boreal_(Finland)	1	BEPE	14.1947	257.033
Boreal_(Finland)	1	BEPE	9.25488	218.995
Boreal_(Finland)	1	BEPE	9.57113	319.884
Boreal_(Finland)	1	BEPE	19.8689	221.227
Boreal_(Finland)	1	PISY	0.473455	92.0446
Boreal_(Finland)	1	BEPE	13.7075	224.247
Boreal_(Finland)	1	BEPE	15.7904	231.108
Boreal_(Finland)	1	BEPE	11.9921	285.26
Boreal_(Finland)	1	PIAB	0.05394	67.425
Boreal_(Finland)	1	PISY	0.301033	79.1409
Boreal_(Finland)	1	PIAB	0.108767	45.3194
Boreal_(Finland)	1	PISY	0.562468	91.4904
Boreal_(Finland)	1	BEPE	15.9206	224.73
Boreal_(Finland)	1	PIAB	0.105253	65.7833
Boreal_(Finland)	1	PISY	0.4182	84.0812
Boreal_(Finland)	1	PISY	0.495853	91.9939
Boreal_(Finland)	1	PIAB	0.136607	48.7881
Boreal_(Finland)	1	PIAB	0.117577	83.9833
Boreal_(Finland)	1	BEPE	8.7069	362.787
Boreal_(Finland)	1	BEPE	12.0951	208.117
Boreal_(Finland)	1	PIAB	0.103217	86.0139
Boreal_(Finland)	1	PIAB	0.09276	51.5333
Boreal_(Finland)	1	BEPE	9.10005	252.845
Boreal_(Finland)	1	PISY	0.497363	87.2894
Boreal_(Finland)	1	PISY	0.573167	77.7894
Boreal_(Finland)	1	BEPE	7.23061	200.528
Boreal_(Finland)	1	PISY	0.359137	99.0013
Boreal_(Finland)	1	BEPE	14.1069	304.32
Boreal_(Finland)	1	PIAB	0.12106	151.325
Boreal_(Finland)	2	BEPE	12.1721	203.294
Boreal_(Finland)	2	BEPE	8.03787	211.571
Boreal_(Finland)	2	BEPE	10.7036	208.731
Boreal_(Finland)	2	BEPE	12.6785	204.888
Boreal_(Finland)	2	PIAB	0.13854	69.27
Boreal_(Finland)	2	BEPE	12.2467	274.732
Boreal_(Finland)	2	BEPE	14.0671	239.142
Boreal_(Finland)	2	BEPE	12.2592	213.79
Boreal_(Finland)	2	BEPE	9.76187	220.993
Boreal_(Finland)	2	BEPE	12.126	210.951
Boreal_(Finland)	2	BEPE	10.8901	277.574
Boreal_(Finland)	2	BEPE	9.26572	229.233
Boreal_(Finland)	2	PIAB	0.07877	98.4625
Boreal_(Finland)	2	PIAB	0.10532	75.2286
Boreal_(Finland)	2	BEPE	11.947	211.446
Boreal_(Finland)	2	BEPE	9.51497	204.993
Boreal_(Finland)	2	PIAB	0.0691667	38.4259
Boreal_(Finland)	2	BEPE	10.0036	197.408
Boreal_(Finland)	2	BEPE	12.1249	189.878
Boreal_(Finland)	2	PIAB	0.106933	53.4667
Boreal_(Finland)	2	PIAB	0.145867	60.7778
Boreal_(Finland)	2	PIAB	0.10716	59.5333
Boreal_(Finland)	2	BEPE	9.55647	171.462
Boreal_(Finland)	2	BEPE	11.1074	212.784
Boreal_(Finland)	2	BEPE	16.7604	203.882
Boreal_(Finland)	2	PIAB	0.179	55.9375
Boreal_(Finland)	2	BEPE	12.6707	226.357
Boreal_(Finland)	2	BEPE	14.5396	260.016
Boreal_(Finland)	2	PIAB	0.133617	83.5104
Boreal_(Finland)	2	PIAB	0.208267	61.2549
Boreal_(Finland)	2	BEPE	10.7357	251.281
Boreal_(Finland)	2	PIAB	0.140108	77.8376
Boreal_(Finland)	2	PIAB	0.12234	61.17
Boreal_(Finland)	2	BEPE	24.2558	231.787
Boreal_(Finland)	2	BEPE	8.41207	211.89
Boreal_(Finland)	2	BEPE	23.6602	194.218
Boreal_(Finland)	2	PIAB	0.14963	53.4393
Boreal_(Finland)	2	BEPE	8.84133	191.029
Boreal_(Finland)	2	PIAB	0.137703	62.5924
Boreal_(Finland)	2	PIAB	0.105425	65.8904
Boreal_(Finland)	2	PIAB	0.131023	65.8409
Boreal_(Finland)	2	PIAB	0.07358	61.3167
Boreal_(Finland)	2	BEPE	11.9818	242.459
Boreal_(Finland)	2	PIAB	0.16169	53.8967
Boreal_(Finland)	2	BEPE	11.9667	245.474
Boreal_(Finland)	2	PIAB	0.128733	53.6389
Boreal_(Finland)	2	BEPE	9.76633	212.518
Boreal_(Finland)	2	PIAB	0.069	115
Boreal_(Finland)	2	PIAB	0.104467	65.2917
Boreal_(Finland)	2	BEPE	9.2066	209.965
Boreal_(Finland)	2	BEPE	23.3067	196.542
Boreal_(Finland)	2	PIAB	0.14464	60.2667
Boreal_(Finland)	2	PIAB	0.143893	89.9333
Boreal_(Finland)	2	PIAB	0.102287	85.2389
Boreal_(Finland)	2	PIAB	0.102897	64.3104
Boreal_(Finland)	2	BEPE	22.294	248.951
Boreal_(Finland)	2	BEPE	20.964	213.941
Boreal_(Finland)	2	PIAB	0.0905567	50.3093
Boreal_(Finland)	2	BEPE	16.1148	289.635
Boreal_(Finland)	2	PIAB	0.103777	47.1712
Boreal_(Finland)	2	PIAB	0.17229	61.5321
Boreal_(Finland)	2	BEPE	13.3221	269.319
Boreal_(Finland)	2	PIAB	0.11353	70.9562
Boreal_(Finland)	2	BEPE	12.6921	232.682
Boreal_(Finland)	2	PIAB	0.102118	72.9414
Boreal_(Finland)	2	PIAB	0.12306	68.3667
Boreal_(Finland)	2	PIAB	0.130243	59.2015
Boreal_(Finland)	2	BEPE	26.1986	338.948
Boreal_(Finland)	2	PIAB	0.159033	79.5167
Boreal_(Finland)	2	PIAB	0.135987	67.9933
Boreal_(Finland)	2	PIAB	0.121647	67.5815
Boreal_(Finland)	2	PIAB	0.1184	74
Boreal_(Finland)	2	PIAB	0.1049	57.9558
Boreal_(Finland)	2	PIAB	0.12265	68.1389
Boreal_(Finland)	2	PIAB	0.0950333	67.881
Boreal_(Finland)	2	PIAB	0.0808467	101.058
Boreal_(Finland)	2	BEPE	7.69393	206.91
Boreal_(Finland)	2	PIAB	0.0891867	55.7417
Boreal_(Finland)	2	PIAB	0.129117	64.5583
Boreal_(Finland)	2	PIAB	0.12535	69.6389
Boreal_(Finland)	2	PIAB	0.119633	59.8167
Boreal_(Finland)	2	PIAB	0.143167	69.8374
Boreal_(Finland)	2	BEPE	16.7633	193.387
Boreal_(Finland)	2	PIAB	0.15545	111.036
Boreal_(Finland)	2	PIAB	0.101233	63.2708
Boreal_(Finland)	2	BEPE	4.90693	185.843
Boreal_(Finland)	2	BEPE	11.0081	239.914
Boreal_(Finland)	2	BEPE	20.0037	268.448
Boreal_(Finland)	2	PIAB	0.101077	72.1976
Boreal_(Finland)	2	BEPE	8.47724	223.563
Boreal_(Finland)	2	PIAB	0.101753	84.7944
Boreal_(Finland)	2	PIAB	0.1382	69.1
Boreal_(Finland)	2	PIAB	0.1332	66.6
Boreal_(Finland)	2	PIAB	0.105157	65.7229
Boreal_(Finland)	2	PIAB	0.107067	66.9167
Boreal_(Finland)	2	BEPE	18.6587	370.648
Boreal_(Finland)	2	PIAB	0.0702467	70.2467
Boreal_(Finland)	2	BEPE	12.1257	347.16
Boreal_(Finland)	2	BEPE	21.1276	309.51
Boreal_(Finland)	2	PIAB	0.0961233	68.6595
Boreal_(Finland)	2	PIAB	0.0934993	77.9161
Boreal_(Finland)	2	PIAB	0.07485	62.375
Boreal_(Finland)	2	PIAB	0.10127	84.3917
Boreal_(Finland)	2	PIAB	0.105977	58.8759
Boreal_(Finland)	2	PIAB	0.0916633	57.2896
Boreal_(Finland)	2	BEPE	24.8061	282.455
Boreal_(Finland)	2	PIAB	0.100773	71.981
Boreal_(Finland)	2	BEPE	31.5709	301.157
Boreal_(Finland)	2	PIAB	0.0978	81.5
Boreal_(Finland)	2	BEPE	20.3938	324.653
Boreal_(Finland)	2	BEPE	19.6384	296.464
Boreal_(Finland)	2	PIAB	0.0927367	66.2405
Boreal_(Finland)	2	PIAB	0.0786333	131.056
Boreal_(Finland)	2	BEPE	7.10703	249.432
Mount_beech_(Romania)	1	fasy	17.6843	362.153
Mount_beech_(Romania)	1	fasy	17.2127	399.357
Mount_beech_(Romania)	1	fasy	12.8723	301.901
Mount_beech_(Romania)	1	fasy	15.49	384.273
Mount_beech_(Romania)	1	fasy	13.1057	403.911
Mount_beech_(Romania)	1	fasy	10.9753	357.262
Mount_beech_(Romania)	1	fasy	13.148	352.52
Mount_beech_(Romania)	1	fasy	14.6317	333.725
Mount_beech_(Romania)	1	fasy	15.4287	318.056
Mount_beech_(Romania)	1	fasy	14.196	339.073
Mount_beech_(Romania)	1	fasy	8.44933	352.698
Mount_beech_(Romania)	1	fasy	14.121	306.233
Mount_beech_(Romania)	1	fasy	17.8667	375.579
Mount_beech_(Romania)	1	fasy	13.255	343.251
Mount_beech_(Romania)	1	fasy	16.2957	274.21
Mount_beech_(Romania)	1	fasy	12.778	315.478
Mount_beech_(Romania)	1	fasy	11.5747	404.282
Mount_beech_(Romania)	1	fasy	12.7927	406.366
Mount_beech_(Romania)	1	fasy	14.624	476.989
Mount_beech_(Romania)	1	fasy	9.58867	411.561
Mount_beech_(Romania)	1	fasy	16.6625	424.481
Mount_beech_(Romania)	1	fasy	11.4261	422.884
Mount_beech_(Romania)	1	fasy	14.0611	411.67
Mount_beech_(Romania)	1	fasy	17.292	403.912
Mount_beech_(Romania)	1	fasy	21.6201	382.157
Mount_beech_(Romania)	1	fasy	13.0362	327.101
Mount_beech_(Romania)	1	fasy	16.2642	377.113
Mount_beech_(Romania)	1	fasy	17.6427	406.037
Mount_beech_(Romania)	1	fasy	12.7463	406.713
Mount_beech_(Romania)	1	fasy	11.5783	423.329
Mount_beech_(Romania)	1	fasy	18.4873	413.793
Mount_beech_(Romania)	1	fasy	12.8292	312.693
Mount_beech_(Romania)	1	fasy	10.103	367.737
Mount_beech_(Romania)	1	fasy	11.5677	380.887
Mount_beech_(Romania)	1	fasy	13.3404	349.093
Mount_beech_(Romania)	1	fasy	15.9374	352.661
Mount_beech_(Romania)	1	fasy	11.178	322.347
Mount_beech_(Romania)	1	fasy	19.7299	356.786
Mount_beech_(Romania)	1	fasy	14.5101	388.057
Mount_beech_(Romania)	1	fasy	18.0985	367.421
Mount_beech_(Romania)	1	fasy	10.7584	406.21
Mount_beech_(Romania)	1	fasy	8.9714	395.988
Mount_beech_(Romania)	1	fasy	15.955	438.535
Mount_beech_(Romania)	1	fasy	16.014	386.581
Mount_beech_(Romania)	1	fasy	15.558	438.023
Mount_beech_(Romania)	1	fasy	14.2853	433.329
Mount_beech_(Romania)	1	fasy	17.1633	401.811
Mount_beech_(Romania)	1	fasy	11.7469	410.721
Mount_beech_(Romania)	1	fasy	10.8665	345.862
Mount_beech_(Romania)	1	fasy	11.8616	370.83
Mount_beech_(Romania)	1	fasy	11.4619	382.414
Mount_beech_(Romania)	1	fasy	11.9944	377.796
Mount_beech_(Romania)	1	fasy	15.9074	442.997
Mount_beech_(Romania)	1	fasy	12.8829	373.705
Mount_beech_(Romania)	2	fasy	9.15433	392.324
Mount_beech_(Romania)	2	fasy	9.813	430.963
Mount_beech_(Romania)	2	fasy	7.899	409.572
Mount_beech_(Romania)	2	fasy	11.1887	432.553
Mount_beech_(Romania)	2	fasy	10.326	378.517
Mount_beech_(Romania)	2	fasy	11.9937	391.698
Mount_beech_(Romania)	2	fasy	8.94467	384.963
Mount_beech_(Romania)	2	fasy	9.79833	361.081
Mount_beech_(Romania)	2	fasy	11.2797	371.523
Mount_beech_(Romania)	2	fasy	11.4613	399.765
Mount_beech_(Romania)	2	fasy	17.0013	425.053
Mount_beech_(Romania)	2	fasy	20.3977	406.397
Mount_beech_(Romania)	2	fasy	11.9073	414.662
Mount_beech_(Romania)	2	fasy	7.93333	459.108
Mount_beech_(Romania)	2	fasy	17.2367	388.224
Mount_beech_(Romania)	2	fasy	17.009	494.207
Mount_beech_(Romania)	2	fasy	10.5793	353.543
Mount_beech_(Romania)	2	fasy	16.8563	339.784
Mount_beech_(Romania)	2	fasy	16.928	361.225
Mount_beech_(Romania)	2	fasy	16.9823	386.471
Mount_beech_(Romania)	2	fasy	14.2957	398.47
Mount_beech_(Romania)	2	fasy	12.945	394.509
Mount_beech_(Romania)	2	fasy	13.5473	383.838
Mount_beech_(Romania)	2	fasy	13.4938	427.055
Mount_beech_(Romania)	2	fasy	16.0503	413.641
Mount_beech_(Romania)	2	fasy	11.4595	519.212
Mount_beech_(Romania)	2	fasy	14.6597	487
Mount_beech_(Romania)	2	fasy	12.1706	405.742
Mount_beech_(Romania)	2	fasy	12.2825	467.425
Mount_beech_(Romania)	2	fasy	15.4268	447.184
Mount_beech_(Romania)	2	fasy	20.4078	438.205
Mount_beech_(Romania)	2	fasy	10.7662	425.675
Mount_beech_(Romania)	2	fasy	12.466	382.864
Mount_beech_(Romania)	2	fasy	15.3154	369.442
Mount_beech_(Romania)	2	fasy	16.333	389.033
Mount_beech_(Romania)	2	fasy	19.8423	377.269
Mount_beech_(Romania)	2	fasy	15.1717	324.584
Mount_beech_(Romania)	2	fasy	15.2253	399.582
Mount_beech_(Romania)	2	fasy	17.445	437.709
Mount_beech_(Romania)	2	fasy	16.8572	406.571
Mount_beech_(Romania)	2	fasy	8.75963	313.069
Mount_beech_(Romania)	2	fasy	8.07467	327.531
Mount_beech_(Romania)	2	fasy	7.4133	327.009
Mount_beech_(Romania)	2	fasy	8.59357	359.613
Mount_beech_(Romania)	2	fasy	12.9961	391.321
Mount_beech_(Romania)	2	fasy	17.565	365.48
Mount_beech_(Romania)	2	fasy	16.0805	402.139
Mount_beech_(Romania)	2	fasy	10.1983	416.989
Mount_beech_(Romania)	2	fasy	12.6166	389.259
Mount_beech_(Romania)	2	fasy	20.1327	390.547
Mount_beech_(Romania)	2	fasy	18.501	354.991
Mount_beech_(Romania)	2	fasy	31.3461	415.639
Mount_beech_(Romania)	2	fasy	14.9276	277.238
Mount_beech_(Romania)	2	fasy	16.557	315.346
Mount_beech_(Romania)	2	fasy	22.3261	408.712
Mount_beech_(Romania)	2	fasy	20.0193	423.25
Mount_beech_(Romania)	2	fasy	19.9488	372.775
Mount_beech_(Romania)	2	fasy	20.1631	426.391
Mount_beech_(Romania)	2	fasy	21.691	384.308
Mount_beech_(Romania)	2	fasy	12.5153	398.691
Mount_beech_(Romania)	3	fasy	14.6607	423.107
Mount_beech_(Romania)	3	fasy	17.0085	290.868
Mount_beech_(Romania)	3	fasy	10.8969	297.236
Mount_beech_(Romania)	3	fasy	18.3867	302.087
Mount_beech_(Romania)	3	fasy	18.8356	340.754
Mount_beech_(Romania)	3	fasy	15.7218	311.081
Mount_beech_(Romania)	3	fasy	9.19413	373.806
Mount_beech_(Romania)	3	fasy	6.89403	321.132
Mount_beech_(Romania)	3	fasy	13.511	391.762
Mount_beech_(Romania)	3	fasy	11.7278	413.081
Mount_beech_(Romania)	3	fasy	12.296	389.768
Mount_beech_(Romania)	3	fasy	24.2483	395.006
Mount_beech_(Romania)	3	fasy	13.4075	412.622
Mount_beech_(Romania)	3	fasy	16.5297	392.149
Mount_beech_(Romania)	3	fasy	18.9905	425.512
Mount_beech_(Romania)	3	fasy	15.509	401.452
Mount_beech_(Romania)	3	fasy	11.8763	393.487
Mount_beech_(Romania)	3	fasy	17.6756	475.22
Mount_beech_(Romania)	3	fasy	14.2478	424.246
Mount_beech_(Romania)	3	fasy	18.8403	387.008
Mount_beech_(Romania)	3	fasy	9.3986	403.572
Mount_beech_(Romania)	3	fasy	14.7327	344.785
Mount_beech_(Romania)	3	fasy	18.0507	400.544
Mount_beech_(Romania)	3	fasy	18.8366	436.347
Mount_beech_(Romania)	3	fasy	12.5498	409.665
Mount_beech_(Romania)	3	fasy	12.8595	458.88
Mount_beech_(Romania)	3	fasy	15.8204	481.734
Mount_beech_(Romania)	3	fasy	9.5817	399.681
Mount_beech_(Romania)	3	fasy	13.0168	361.936
Mount_beech_(Romania)	3	fasy	14.1109	509.555
Mount_beech_(Romania)	3	fasy	11.3882	449.65
Mount_beech_(Romania)	3	fasy	14.9329	457.349
Mount_beech_(Romania)	3	fasy	13.7837	369.25
Mount_beech_(Romania)	3	fasy	14.939	388.749
Mount_beech_(Romania)	3	fasy	14.4945	396.166
Mount_beech_(Romania)	3	fasy	11.0213	394.153
Mount_beech_(Romania)	3	fasy	19.7756	358.044
Mount_beech_(Romania)	4	fasy	19.4777	406.851
Mount_beech_(Romania)	4	fasy	14.3627	430.318
Mount_beech_(Romania)	4	fasy	13.206	399.395
Mount_beech_(Romania)	4	fasy	13.2033	383.934
Mount_beech_(Romania)	4	fasy	19.241	406.564
Mount_beech_(Romania)	4	fasy	15.882	397.298
Mount_beech_(Romania)	4	fasy	17.7263	438.657
Mount_beech_(Romania)	4	fasy	14.507	410.376
Mount_beech_(Romania)	4	fasy	11.9103	425.622
Mount_beech_(Romania)	4	fasy	15.6481	385.149
Mount_beech_(Romania)	4	fasy	14.3108	429.067
Mount_beech_(Romania)	4	fasy	13.7157	428.835
Mount_beech_(Romania)	4	fasy	17.771	399.407
Mount_beech_(Romania)	4	fasy	17.9609	415.053
Mount_beech_(Romania)	4	fasy	18.4565	403.94
Mount_beech_(Romania)	4	fasy	17.3636	448.698
Mount_beech_(Romania)	4	fasy	18.3528	468.014
Mount_beech_(Romania)	4	fasy	15.518	431.521
Mount_beech_(Romania)	4	fasy	14.7348	461.948
Mount_beech_(Romania)	4	fasy	14.112	443.185
Medit_mixed_(Spain)	1	P.nigra	1.35333	29.6281
Medit_mixed_(Spain)	1	P.nigra	0.5	44.381
Medit_mixed_(Spain)	1	P.nigra	1.03333	44.0476
Medit_mixed_(Spain)	1	P.nigra	0.64	40
Medit_mixed_(Spain)	1	P.nigra	0.926667	59.3333
Medit_mixed_(Spain)	1	P.nigra	0.756667	49.4345
Medit_mixed_(Spain)	1	P.nigra	0.82	50.5556
Medit_mixed_(Spain)	1	P.nigra	0.863333	39.4744
Medit_mixed_(Spain)	1	P.nigra	0.85	51.088
Medit_mixed_(Spain)	1	P.nigra	0.863333	47.037
Medit_mixed_(Spain)	1	P.nigra	0.926667	42.3308
Medit_mixed_(Spain)	1	P.nigra	0.756667	33.4596
Medit_mixed_(Spain)	1	P.nigra	0.926667	46.3333
Medit_mixed_(Spain)	1	P.nigra	0.75	48.3194
Medit_mixed_(Spain)	1	P.nigra	0.816667	37.1212
Medit_mixed_(Spain)	1	P.nigra	0.82	35.0142
Medit_mixed_(Spain)	1	P.nigra	0.563333	48.6111
Medit_mixed_(Spain)	1	P.nigra	0.713333	31.6799
Medit_mixed_(Spain)	1	P.nigra	0.74	36.625
Medit_mixed_(Spain)	1	P.nigra	0.646667	37.338
Medit_mixed_(Spain)	1	P.nigra	0.653333	35.1296
Medit_mixed_(Spain)	1	P.nigra	0.68	32.8283
Medit_mixed_(Spain)	1	P.nigra	0.686667	34.537
Medit_mixed_(Spain)	1	P.nigra	0.773333	45.6764
Medit_mixed_(Spain)	1	P.nigra	0.726667	37.6481
Medit_mixed_(Spain)	1	P.nigra	0.696667	37.3704
Medit_mixed_(Spain)	1	P.nigra	0.616667	47.0139
Medit_mixed_(Spain)	1	P.nigra	0.853333	38.819
Medit_mixed_(Spain)	1	P.nigra	0.953333	44.8182
Medit_mixed_(Spain)	1	P.nigra	0.84	32.0389
Medit_mixed_(Spain)	1	P.nigra	0.743333	39.9583
Medit_mixed_(Spain)	1	P.nigra	0.62	34.4886
Medit_mixed_(Spain)	1	P.nigra	0.94	40.4167
Medit_mixed_(Spain)	1	P.nigra	0.806667	36.7949
Medit_mixed_(Spain)	1	P.nigra	0.84	47.0417
Medit_mixed_(Spain)	1	P.nigra	0.676667	44.7354
Medit_mixed_(Spain)	1	P.nigra	0.876667	48.8889
Medit_mixed_(Spain)	1	P.nigra	0.753333	40.4259
Medit_mixed_(Spain)	1	P.nigra	0.636667	38.0556
Medit_mixed_(Spain)	1	P.nigra	0.886667	40.4823
Medit_mixed_(Spain)	1	P.nigra	0.756667	42.3704
Medit_mixed_(Spain)	1	P.nigra	0.936667	40.2115
Medit_mixed_(Spain)	1	P.nigra	0.663333	37.213
Medit_mixed_(Spain)	1	P.nigra	0.436667	44
Medit_mixed_(Spain)	1	P.nigra	0.88	39.7191
Medit_mixed_(Spain)	1	P.nigra	0.876667	38.0536
Medit_mixed_(Spain)	1	P.nigra	0.83	35.1958
Medit_mixed_(Spain)	1	P.nigra	0.956667	33.9136
Medit_mixed_(Spain)	1	P.nigra	0.773333	34.4736
Medit_mixed_(Spain)	1	P.nigra	0.953333	39.6856
Medit_mixed_(Spain)	1	P.nigra	0.826667	42.9856
Medit_mixed_(Spain)	1	P.nigra	0.9	34.6154
Medit_mixed_(Spain)	1	P.nigra	0.783333	42.5694
Medit_mixed_(Spain)	1	P.nigra	0.713333	36.0219
Medit_mixed_(Spain)	1	P.nigra	1.02333	43.9394
Medit_mixed_(Spain)	1	P.nigra	0.773333	42.119
Medit_mixed_(Spain)	1	P.nigra	0.673333	38.9167
Medit_mixed_(Spain)	2	P.nigra	0.873333	45.4978
Medit_mixed_(Spain)	2	P.nigra	0.803333	38.0952
Medit_mixed_(Spain)	2	P.nigra	0.816667	56.0438
Medit_mixed_(Spain)	2	P.nigra	0.656667	39.2857
Medit_mixed_(Spain)	2	P.nigra	0.94	45.5909
Medit_mixed_(Spain)	2	P.nigra	1.16	48.3897
Medit_mixed_(Spain)	2	P.sylvestris	0.466667	56.7057
Medit_mixed_(Spain)	2	P.sylvestris	0.536667	37.5864
Medit_mixed_(Spain)	2	P.sylvestris	0.47	40.111
Medit_mixed_(Spain)	2	P.sylvestris	0.283333	38.4457
Medit_mixed_(Spain)	2	P.sylvestris	0.403333	43.0183
Medit_mixed_(Spain)	2	P.sylvestris	0.306667	35.926
Medit_mixed_(Spain)	2	P.sylvestris	0.38	45.4244
Medit_mixed_(Spain)	2	P.nigra	0.746667	37.6326
Medit_mixed_(Spain)	2	Q.faginea	3.92667	83.3404
Medit_mixed_(Spain)	2	Q.faginea	3.54	101.536
Medit_mixed_(Spain)	2	Q.faginea	2.45667	116.444
Medit_mixed_(Spain)	2	Q.ilex	5.12333	64.0314
Medit_mixed_(Spain)	2	P.nigra	0.55	45.8333
Medit_mixed_(Spain)	2	P.nigra	0.956667	36.7949
Medit_mixed_(Spain)	2	P.nigra	0.756667	43.588
Medit_mixed_(Spain)	2	P.nigra	0.696667	45.5952
Medit_mixed_(Spain)	2	P.nigra	0.976667	34.3681
Medit_mixed_(Spain)	2	P.nigra	0.866667	43.8426
Medit_mixed_(Spain)	2	P.nigra	0.543333	36.0556
Medit_mixed_(Spain)	2	P.nigra	0.906667	40.1641
Medit_mixed_(Spain)	2	P.nigra	0.623333	44.5238
Medit_mixed_(Spain)	2	P.nigra	0.64	35.5324
Medit_mixed_(Spain)	2	P.sylvestris	0.453333	46.3889
Medit_mixed_(Spain)	2	P.sylvestris	0.39	42.0833
Medit_mixed_(Spain)	2	P.nigra	0.76	30.8387
Medit_mixed_(Spain)	2	P.nigra	0.886667	37.1853
Medit_mixed_(Spain)	2	P.nigra	0.683333	40.0529
Medit_mixed_(Spain)	2	P.nigra	0.806667	32.9672
Medit_mixed_(Spain)	2	P.nigra	0.96	39.1142
Medit_mixed_(Spain)	2	P.sylvestris	0.21	52.1368
Medit_mixed_(Spain)	2	P.sylvestris	0.306667	44.1729
Medit_mixed_(Spain)	2	P.sylvestris	0.63	31.9675
Medit_mixed_(Spain)	2	P.sylvestris	0.403333	30.2899
Medit_mixed_(Spain)	2	P.sylvestris	0.366667	35.4996
Medit_mixed_(Spain)	2	P.sylvestris	0.29	37.4633
Medit_mixed_(Spain)	2	P.nigra	1.07333	34.9851
Medit_mixed_(Spain)	2	P.nigra	1.00667	34.0093
Medit_mixed_(Spain)	2	P.nigra	0.9	37.4231
Medit_mixed_(Spain)	2	P.nigra	0.576667	46.9213
Medit_mixed_(Spain)	2	Q.faginea	2.745	114.913
Medit_mixed_(Spain)	2	P.nigra	0.666667	47.2718
Medit_mixed_(Spain)	2	P.nigra	0.606667	38.1085
Medit_mixed_(Spain)	2	P.nigra	0.78	40.9028
Medit_mixed_(Spain)	2	P.nigra	0.856667	42.7381
Medit_mixed_(Spain)	2	P.nigra	0.676667	35.1684
Medit_mixed_(Spain)	2	P.nigra	0.793333	47.7315
Medit_mixed_(Spain)	2	P.nigra	0.91	35.8317
Medit_mixed_(Spain)	2	Q.faginea	3.43	95.2778
Medit_mixed_(Spain)	2	Q.faginea	2.85667	90.6415
Medit_mixed_(Spain)	2	Q.faginea	4.28667	97.8634
Medit_mixed_(Spain)	2	Q.ilex	3.03667	53.2336
Medit_mixed_(Spain)	2	P.nigra	0.756667	35.5
Medit_mixed_(Spain)	2	P.nigra	0.933333	41.835
Medit_mixed_(Spain)	2	P.nigra	0.663333	33.1061
Medit_mixed_(Spain)	2	P.nigra	0.796667	37.5295
Medit_mixed_(Spain)	2	P.nigra	0.686667	39.6065
Medit_mixed_(Spain)	2	P.nigra	0.74	35.7576
Medit_mixed_(Spain)	2	P.nigra	0.873333	36.7424
Medit_mixed_(Spain)	2	Q.faginea	4.59	132.144
Medit_mixed_(Spain)	2	Q.faginea	2.12667	100.375
Medit_mixed_(Spain)	2	Q.faginea	2.19	118.303
Medit_mixed_(Spain)	2	Q.ilex	4.42	51.9475
Medit_mixed_(Spain)	2	P.nigra	0.606667	44.8333
Medit_mixed_(Spain)	2	P.nigra	0.65	41.8295
Medit_mixed_(Spain)	2	P.nigra	0.813333	41.3426
Medit_mixed_(Spain)	2	P.nigra	0.756667	41.0833
Medit_mixed_(Spain)	2	P.nigra	0.72	51.7956
Medit_mixed_(Spain)	2	P.nigra	1.11333	35.5999
Medit_mixed_(Spain)	2	P.nigra	0.816667	38.5438
Medit_mixed_(Spain)	2	P.nigra	0.76	37.5231
Medit_mixed_(Spain)	2	P.nigra	0.436667	44.4444
Medit_mixed_(Spain)	2	P.nigra	0.73	37.7098
Medit_mixed_(Spain)	2	P.sylvestris	0.286667	44.5833
Medit_mixed_(Spain)	2	P.sylvestris	0.396667	33.1508
Medit_mixed_(Spain)	2	P.sylvestris	0.316667	33.8889
Medit_mixed_(Spain)	2	P.sylvestris	0.37	42.6389
Medit_mixed_(Spain)	2	Q.ilex	4.13333	59.801
Medit_mixed_(Spain)	2	P.nigra	0.693333	37.3194
Medit_mixed_(Spain)	2	P.nigra	0.446667	44.1389
Medit_mixed_(Spain)	2	P.nigra	0.61	38.6667
Medit_mixed_(Spain)	2	P.sylvestris	0.206667	51.3234
Medit_mixed_(Spain)	2	P.sylvestris	0.353333	43.0654
Medit_mixed_(Spain)	2	P.sylvestris	0.24	33.6749
Medit_mixed_(Spain)	2	P.nigra	1.09667	NA
Medit_mixed_(Spain)	2	P.nigra	0.646667	34.8485
Medit_mixed_(Spain)	2	P.nigra	0.686667	49.0476
Medit_mixed_(Spain)	2	P.nigra	0.67	38.5185
Medit_mixed_(Spain)	2	P.nigra	0.46	53.3333
Medit_mixed_(Spain)	2	P.nigra	0.573333	51.3333
Medit_mixed_(Spain)	2	P.nigra	0.943333	34.7495
Medit_mixed_(Spain)	2	P.nigra	0.8	40.6818
Medit_mixed_(Spain)	2	P.nigra	0.973333	36.3889
Medit_mixed_(Spain)	2	P.nigra	1.25333	32.7368
Medit_mixed_(Spain)	2	P.nigra	0.576667	41.7917
Medit_mixed_(Spain)	2	P.nigra	0.766667	38.4461
Medit_mixed_(Spain)	2	P.nigra	0.593333	39.1667
Medit_mixed_(Spain)	2	P.sylvestris	0.313333	44.7697
Medit_mixed_(Spain)	2	P.sylvestris	0.22	39.9079
Medit_mixed_(Spain)	2	P.sylvestris	0.253333	50.734
Medit_mixed_(Spain)	2	P.sylvestris	0.426667	38.2742
Medit_mixed_(Spain)	2	Q.faginea	3.40667	110.198
Medit_mixed_(Spain)	2	Q.ilex	4.74333	46.5268
Medit_mixed_(Spain)	2	Q.ilex	5.18	51.9789
Medit_mixed_(Spain)	2	Q.ilex	3.83	66.8441
Medit_mixed_(Spain)	2	Q.faginea	2.45333	99.715
Medit_mixed_(Spain)	2	Q.faginea	3.07	118.41
Medit_mixed_(Spain)	2	Q.faginea	2.73333	110.897
Medit_mixed_(Spain)	2	Q.faginea	4.37333	116.946
Medit_mixed_(Spain)	2	Q.ilex	12.3967	52.8719
Medit_mixed_(Spain)	2	Q.ilex	4.33333	45.7396
Medit_mixed_(Spain)	2	Q.ilex	3.46333	43.8839
Medit_mixed_(Spain)	2	P.nigra	1.31	37.1156
Medit_mixed_(Spain)	2	P.nigra	0.856667	41.6667
Medit_mixed_(Spain)	2	Q.faginea	1.76333	120.268
Medit_mixed_(Spain)	2	Q.faginea	4.61333	136.67
Medit_mixed_(Spain)	2	Q.ilex	2.05667	36.3315
Medit_mixed_(Spain)	2	Q.ilex	2.93333	61.5046
Medit_mixed_(Spain)	2	Q.ilex	2.4	42.3892
Medit_mixed_(Spain)	2	Q.ilex	2.885	51.4679
Medit_mixed_(Spain)	2	Q.ilex	4.14667	55.4255
Medit_mixed_(Spain)	2	Q.ilex	4.23	44.613
Medit_mixed_(Spain)	2	Q.ilex	3.51333	58.9555
Medit_mixed_(Spain)	2	Q.ilex	3.03	52.7465
Medit_mixed_(Spain)	2	P.nigra	0.946667	32.4493
Medit_mixed_(Spain)	2	P.nigra	0.796667	38.697
Medit_mixed_(Spain)	2	Q.faginea	2.08	113.737
Medit_mixed_(Spain)	2	Q.faginea	2.21	133.929
Medit_mixed_(Spain)	2	Q.faginea	3.58333	116.758
Medit_mixed_(Spain)	2	Q.faginea	2.61	122.333
Medit_mixed_(Spain)	2	Q.ilex	3.03333	46.5734
Medit_mixed_(Spain)	2	Q.ilex	2.67	42.1719
Medit_mixed_(Spain)	2	Q.ilex	3.37667	55.3761
Medit_mixed_(Spain)	2	Q.ilex	3.19333	49.5216
Medit_mixed_(Spain)	2	Q.ilex	3.16	50.9429
Riparian_chaparral_evergreen_(California)	54	Baccharis_pilularis	2.56309	81.767
Riparian_chaparral_evergreen_(California)	54	Baccharis_pilularis	2.0198	93.1454
Riparian_chaparral_evergreen_(California)	54	Baccharis_pilularis	1.95029	94.3544
Riparian_chaparral_evergreen_(California)	54	Baccharis_pilularis	1.18836	95.7074
Riparian_chaparral_evergreen_(California)	54	Baccharis_pilularis	0.866895	74.5078
Riparian_chaparral_evergreen_(California)	54	Baccharis_pilularis	0.747	172.834
Riparian_chaparral_evergreen_(California)	54	Baccharis_pilularis	0.874687	190.026
Riparian_chaparral_evergreen_(California)	54	Baccharis_pilularis	1.4045	132.09
Riparian_chaparral_evergreen_(California)	54	Baccharis_pilularis	1.01193	81.8886
Riparian_chaparral_evergreen_(California)	54	Baccharis_pilularis	1.679	142.484
Riparian_chaparral_evergreen_(California)	54	Baccharis_pilularis	4.11083	129.935
Riparian_chaparral_evergreen_(California)	54	Baccharis_pilularis	0.64084	83.3373
Riparian_chaparral_evergreen_(California)	54	Baccharis_pilularis	1.29518	117.006
Riparian_chaparral_evergreen_(California)	54	Baccharis_pilularis	1.30865	86.7978
Riparian_chaparral_evergreen_(California)	54	Baccharis_pilularis	1.16183	240.575
Riparian_chaparral_evergreen_(California)	54	Baccharis_pilularis	0.74835	204.56
Riparian_chaparral_evergreen_(California)	54	Baccharis_pilularis	0.753	124.093
Riparian_chaparral_evergreen_(California)	54	Baccharis_pilularis	1.71807	149.719
Riparian_chaparral_evergreen_(California)	54	Baccharis_pilularis	1.52212	133.581
Riparian_chaparral_evergreen_(California)	54	Baccharis_pilularis	1.8112	176.057
Riparian_chaparral_evergreen_(California)	54	Baccharis_pilularis	1.84318	143.23
Riparian_chaparral_evergreen_(California)	54	Baccharis_pilularis	1.14438	113.252
Riparian_chaparral_evergreen_(California)	54	Baccharis_pilularis	0.993529	97.106
Riparian_chaparral_evergreen_(California)	54	Baccharis_pilularis	1.34183	84.332
Riparian_chaparral_evergreen_(California)	54	Baccharis_pilularis	1.2192	163.385
Riparian_chaparral_evergreen_(California)	54	Baccharis_pilularis	0.978471	78.1917
Riparian_chaparral_evergreen_(California)	54	Baccharis_pilularis	1.05964	82.1538
Riparian_chaparral_evergreen_(California)	54	Baccharis_pilularis	2.18433	90.8395
Riparian_chaparral_evergreen_(California)	54	Baccharis_pilularis	1.83906	90.0414
Riparian_chaparral_evergreen_(California)	54	Baccharis_pilularis	1.9869	207.485
Riparian_chaparral_evergreen_(California)	54	Baccharis_pilularis	2.137	146.83
Riparian_chaparral_evergreen_(California)	54	Baccharis_pilularis	1.43867	NA
Riparian_chaparral_evergreen_(California)	54	Ceanothus_cuneatus_var._cuneatus	0.37149	51.5989
Riparian_chaparral_evergreen_(California)	54	Ceanothus_cuneatus_var._cuneatus	0.527682	40.9421
Riparian_chaparral_evergreen_(California)	54	Ceanothus_cuneatus_var._cuneatus	0.452436	57.2114
Riparian_chaparral_evergreen_(California)	54	Ceanothus_cuneatus_var._cuneatus	0.74368	55.8669
Riparian_chaparral_evergreen_(California)	54	Ceanothus_cuneatus_var._cuneatus	1.33342	39.4258
Riparian_chaparral_evergreen_(California)	54	Ceanothus_cuneatus_var._cuneatus	0.94428	37.5899
Riparian_chaparral_evergreen_(California)	54	Ceanothus_cuneatus_var._cuneatus	1.91057	37.5198
Riparian_chaparral_evergreen_(California)	54	Ceanothus_cuneatus_var._cuneatus	0.846706	40.6564
Riparian_chaparral_evergreen_(California)	54	Ceanothus_cuneatus_var._cuneatus	1.05555	41.6354
Riparian_chaparral_evergreen_(California)	54	Ceanothus_cuneatus_var._cuneatus	0.945667	44.6679
[truncated: 1,018 more rows]

## Sheet: la 20ind
	site	richness	sps	LA.mean	LA.sd	cv_la_sin rar				site	richness	sps	la_cv_rar	cv_la_sin rar		sla_cv_rarf
[truncated: 54 more rows]

[truncated: 1 more sheets: sla 20ind]
